# Supplementary material for: Patterns and Mechanisms of Ancestral Histone Protein Inheritance in Budding Yeast
Source: PubMed Central journal article supplement (PMC3110181; doi:10.1371/journal.pbio.1001075), 2011-06-07

Figure S9

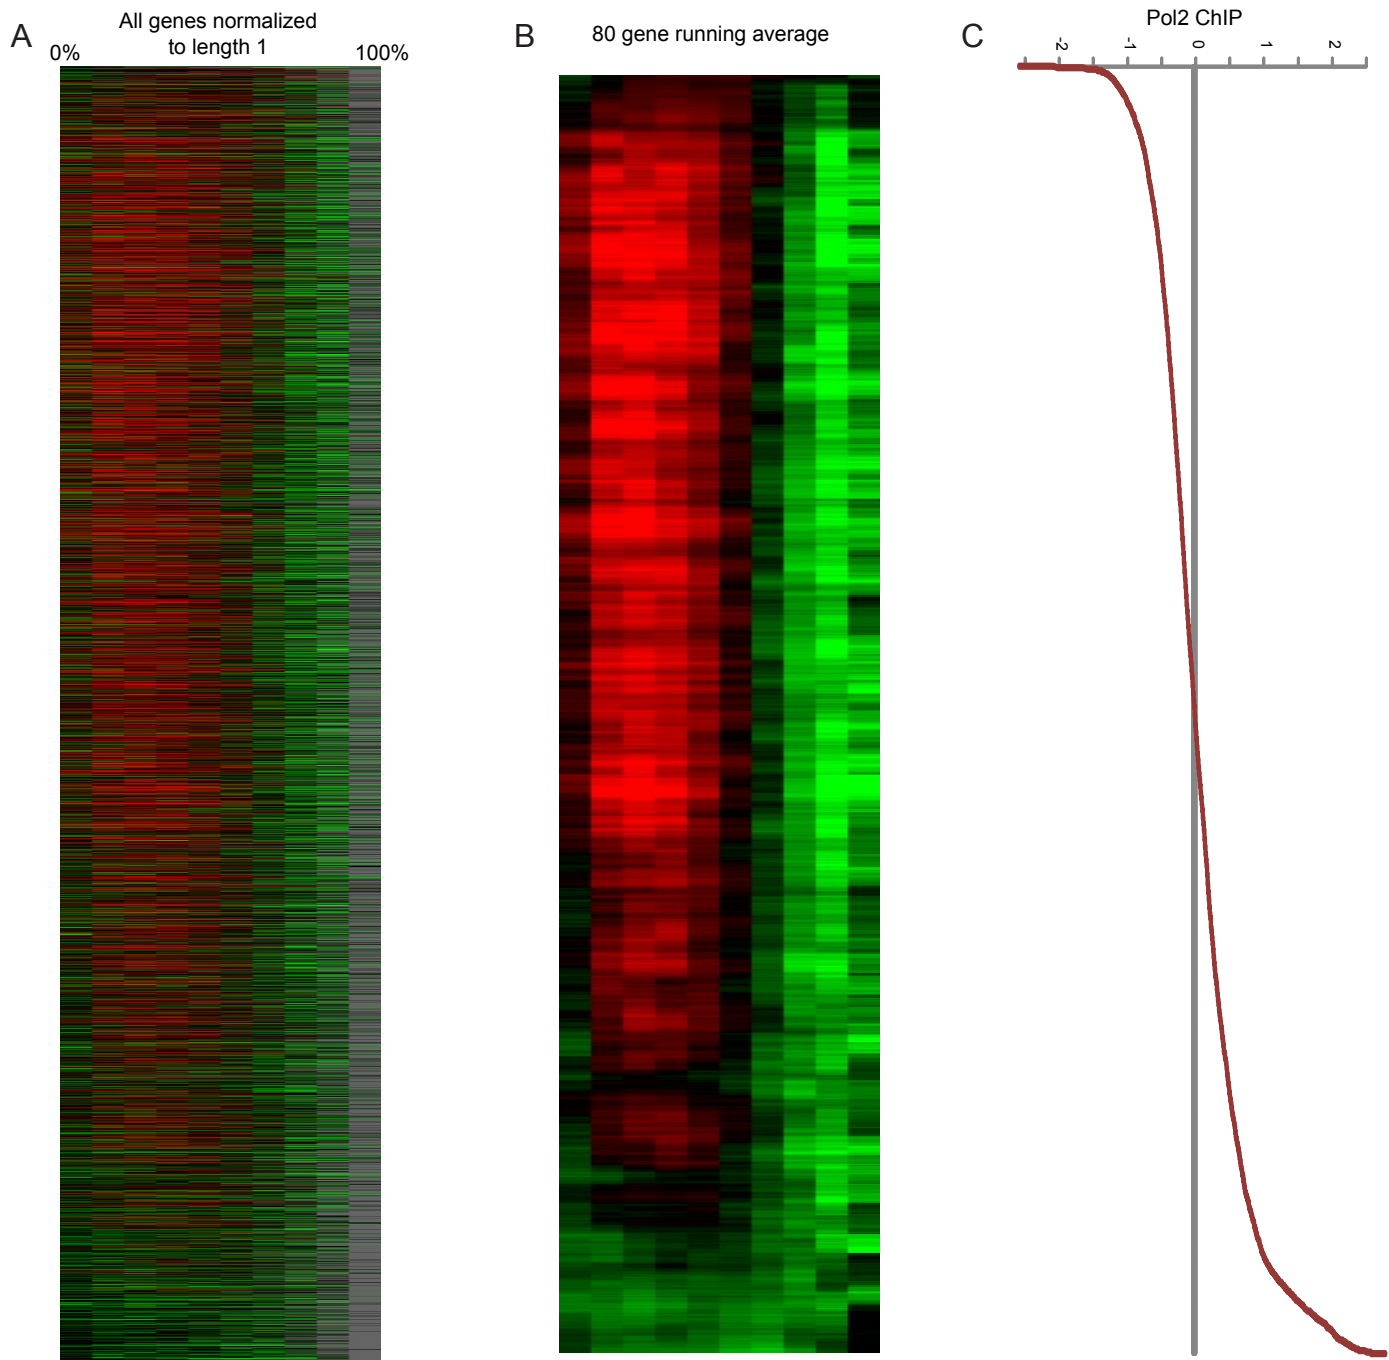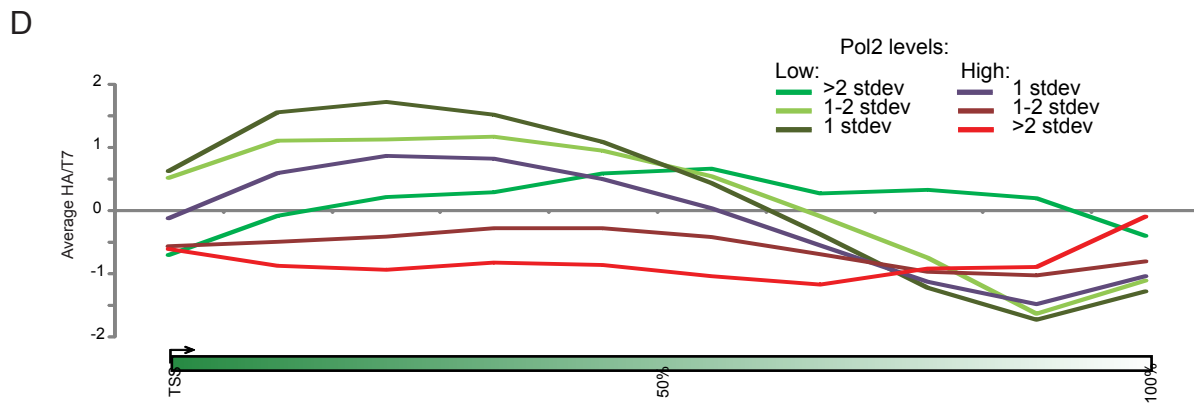

Supplement: pbio.1001075.s009.pdf [file pbio.1001075.s009.pdf]
