# Supplementary material for: Patterns and Mechanisms of Ancestral Histone Protein Inheritance in Budding Yeast
Source: PLoS Biol. 2011 Jun 7;9(6):e1001075. doi: 10.1371/journal.pbio.1001075 (PMC3110181; doi:10.1371/journal.pbio.1001075)
Supplement: Table S1 — HA/T7 ratios for 3 generations. Log2(HA/T7) for all genes is shown at varying distances with respect to the TSS. Genes are sorted according to the median HA/T7 over the 5′ 1 kb. (XLSX) [file pbio.1001075.s019.xlsx]

## Sheet: RatioGenesTSS_Gen3_6K_TSS_1K_so
UNIQUD	NAME	-500	-490	-480	-470	-460	-450	-440	-430	-420	-410	-400	-390	-380	-370	-360	-350	-340	-330	-320	-310	-300	-290	-280	-270	-260	-250	-240	-230	-220	-210	-200	-190	-180	-170	-160	-150	-140	-130	-120	-110	-100	-90	-80	-70	-60	-50	-40	-30
YDR225W	HTA1																												-1.1962	-1.1962	-1.1962	-1.1962	-1.1962	-1.1962	-1.1962	-1.1962	-1.1962	-1.1962	-1.1962	-1.1962	-1.1962	-1.1962	-1.1962
YJL159W	HSP150	-1.3217	-1.3217	-1.3217	-1.3217	-1.3217	-1.3217	-1.3217	-1.3217	-1.3217	-0.8541	-0.7606	-0.7606	-0.7606	-0.7606	-0.7606	-0.7606	-0.7606	-0.7606	-0.7606	-0.7606	-0.7606	-0.7606	-0.7606	-0.7606	-0.7606	-0.7606	-0.7606	-0.7606
YOL060C	MAM3	-0.4226	-0.4226	-0.4226	-0.4226	-0.4226	-0.4226			-0.4809	-0.4809	-0.4809	-0.4809	-0.4809	-0.4809	-0.4809	-0.4809	-0.4809	-0.4809	-0.5853	-1.0032	-1.0032	-1.0032	-1.0032	-1.0032	-1.0032	-1.0032	-1.0032	-1.0032	-1.0032	-1.0032	-1.0032	-1.0032	-1.0032	-1.0032	-1.0032	-1.0032					-0.9702	-0.9702	-0.9702	-0.9702	-0.9702	-0.9702	-0.9702	-0.9702
YDR224C	HTB1	-1.1962	-1.1962	-1.1962	-1.1962	-1.1962	-1.1962	-1.1962	-1.1962	-1.1962	-1.1962	-1.1962	-1.1962	-1.1962	-1.1962
YDR077W	SED1																															-1.7692	-1.7692	-1.7692	-1.7692	-1.7692	-1.7692	-1.7692	-1.7692	-1.7692	-1.7692	-1.7692
YCR012W	PGK1
YIL053W	RHR2
YPR035W	GLN1
YPL061W	ALD6
YBL003C	HTA2																																						-0.9891	-0.9891	-0.9891	-0.9891	-0.9891	-0.9891	-0.9891	-0.9891	-0.9891	-0.9891	-0.9891
YPL144W	POC4	-0.6436	-0.6436	-0.6436	-0.6436	-0.6436	-0.6436	-0.6436	-0.6436	-0.6436	-0.6436	-0.6436	-0.6436	-0.6436	-0.6436	-0.6436																																-1.0738	-1.0738
YML123C	PHO84																																-1.0221	-1.0221	-1.0221	-1.0221	-1.0221	-1.0221	-1.0221	-1.0221	-1.0221	-1.0221	-1.0221	-1.0221
YBL002W	HTB2							-0.5847	-0.5847	-0.5847	-0.5847	-0.5847	-0.5847	-0.5847	-0.5847	-0.5847	-0.5847	-0.5847	-0.5847													-0.9891	-0.9891	-0.9891	-0.9891	-0.9891	-0.9891	-0.9891	-0.9891	-0.9891	-0.9891	-0.9891	-0.9891	-0.9891
YKL152C	GPM1	-1.0521	-1.0521	-1.0521	-1.0521	-1.0521	-1.0521	-1.0521	-1.0521
YKL164C	PIR1	-0.9231	-0.9231	-0.9231	-0.5947	-0.5947	-0.5947	-0.5947	-0.5947	-0.5947	-0.5947	-0.5947	-0.5947	-0.5947	-0.5947	-0.5947	-0.5947	-0.5947	-0.5947																		-1.5656	-1.5656	-1.5656	-1.5656	-1.5656	-1.5656	-1.5656	-1.5656	-1.5656	-1.5656	-1.5656	-1.5656	-1.5656
YCR063W	BUD31																											-0.8623	-0.8623	-0.8623	-0.8623	-0.8623	-0.8623	-0.8623	-0.8623	-0.8623	-0.8623	-0.8623	-0.8623	-0.8623	-0.8623
YDR461W	MFA1	-0.2728	-0.2728	-0.5453	-0.7269	-0.7269	-0.7269	-0.7269	-0.7269	-0.7269	-0.7269	-0.7269	-0.7269	-0.7269	-0.7269
YJR127C	RSF2	-1.1992	-1.1992	-1.1992	-1.1992	-1.1992	-1.1992	-1.1992	-1.1992	-1.1992	-1.1992			-1.1083	-1.1083	-1.1083	-1.1083	-1.1083	-1.1083	-1.1083	-1.1083	-1.1083	-1.1083	-1.1083							-0.3858	-0.3858	-0.3858	-0.3858	-0.3858	-0.3858	-0.3858	-0.3858	-0.3858	-0.3858	-0.3858	-0.3858
YDR385W	EFT2
YNL145W	MFA2																																										-0.3217	-0.3217	-0.3217	-0.3217	-0.3217	-0.3217	-0.3217
YLR099W-A		-0.6567		-0.8302	-0.8302	-0.8302	-0.8302	-0.8302	-0.8302	-0.8302	-0.8302	-0.8302	-0.8302	-0.8302	-0.8302	-0.8302	-0.8302	-0.8302	-0.8302	-0.8302	-0.8302	-0.4342	-0.4342	-0.4342	-0.4342	-0.4342	-0.4342	-0.4342	-0.4342	-0.4342	-0.4342	-1.1477	-1.1477	-1.1477	-1.1477	-1.1477	-1.1477	-1.1477	-1.1477	-1.1477	-1.1162	-0.8648	-0.8648	-0.8648	-0.8648	-0.8648	-0.8648	-0.8648	-0.8648
YNR044W	AGA1	-0.4724	-0.484	-0.484	-0.484	-0.484	-0.484	-0.484	-0.484	-0.484	-0.484	-0.892	-0.892	-0.892	-0.892	-0.892	-0.892	-0.892	-0.892	-0.892	-0.892	-0.892	-0.892	-0.892	-0.892					-0.8453	-0.8453	-0.8453	-0.8453	-0.8453	-0.8453	-0.8453	-0.8453	-0.8453	-0.8453	-0.8453	-0.8453	-0.8453	-0.8453	-0.8453	-0.8453	-0.9712	-1.2651	-1.2651	-1.2651
YDR461C-A		-0.2402	-0.2402	-0.2402	-0.2402	-0.2402	-0.2402	-0.2402	-0.2402	-0.2402	-0.2402	-0.2402	-0.2402	-0.2402	-0.2402	-0.2402	-0.2402	-0.2402	-0.3934	-0.5466	-0.5466	-0.5466	-0.5466	-0.5466	-0.5466	-0.5466	-0.5466	-0.5466	-0.5466	-0.5466	-0.5466	-0.5466	-0.5466	-0.0217	0.3982	0.3982	0.3982	0.3982	0.3982	0.3982	0.3982	0.3982	0.3982	0.3982	0.3982				-1.3635
YMR244C-A		-1.1242	-1.1242	-1.1242	-1.1242	-1.1242	-1.1242	-1.1242	-1.1242	-1.1242	-1.1242	-1.1242								-0.4916	-0.4916	-0.4916	-0.4916	-0.4916	-0.4916	-0.4916	-0.4916	-0.4916	-0.4916	-0.4916	-0.4916	-0.4916	-0.4916	-0.4916	-0.4916	-0.5995	-0.9231	-0.9231	-0.9231	-0.9231	-0.9231	-0.9231	-0.9231	-0.9231	-0.9231	-0.9231	-0.9231	-0.9231	-0.9231
YNL031C	HHT2
YNL030W	HHF2
YDL133C-A	RPL41B									-0.1773	-0.1773	-0.1773	-0.1773	-0.1773	-0.1773	-0.1773	-0.1773	-0.1773	-0.1773	-0.1773	-0.1773	-0.1773
YPR036W-A
YKR042W	UTH1
YOR071C	NRT1				-0.6587	-0.6587	-0.6587	-0.6587	-0.6587	-0.6587	-0.6587	-0.6587	-0.6587	-0.9269	-1.5525	-1.5525	-1.5525	-1.5525	-1.5525	-1.5525	-1.5525	-1.5525	-1.5525	-1.5525	-1.5525	-1.5005	-1.2925	-1.2925	-1.2925	-1.2925	-1.2925	-1.2925	-1.2925	-1.2925	-1.2925	-1.2925	-1.2925	-1.2925	-1.2925	-1.2925	-1.2925	-1.2925	-1.2925		-0.9497	-0.9497	-0.9497	-0.9497	-0.9497
YDL184C	RPL41A	-0.5143	-0.5143	-0.5143	-0.5143	-0.5143	-0.5143	-0.1823	-0.0993	-0.0993	-0.0993	-0.0993	-0.0993	-0.0993	-0.0993	-0.0993	-0.0993	-0.0993	-0.0993	-0.0993	-0.0993	-0.0993
YKL096W-A	CWP2
YBR009C	HHF1
YEL044W	IES6	-0.8846	-0.8846	-0.8846	-0.8846	-0.8846	-0.8846	-0.8846	-0.8846	-0.8846	-0.7763	-0.7763	-0.7763	-0.7763	-0.7763	-0.7763	-0.7763	-0.7763	-0.7763	-0.7763	-0.7763	-0.7763	-0.7763			-1.0766	-1.0766	-1.0766	-1.0766	-1.0766	-1.0766	-1.0766	-1.0766	-1.0766	-1.0766
YFL014W	HSP12								-0.7956	-0.7956	-0.7956	-0.7956	-0.7956	-0.7956	-0.7956	-0.7956	-0.7956	-0.7956	-0.7956					-0.6257	-0.6257	-0.6257	-0.6257	-0.6257	-0.6257	-0.6257	-0.6257	-0.6257	-0.6257	-0.6257	-0.6257	-0.6257	-0.6257	-0.6257	-0.6257	-0.6257	0.8659	0.8659	0.8659	0.8659	0.8659	0.8659	0.8659	0.8659	0.8659
YER046W	SPO73	-0.7874	-0.7874	-0.7874	-0.7874	-0.7874	-0.7874	-0.7874	-0.7874	-0.7874	-0.7874	-0.7874	-0.7874	-0.7874	-0.7874	-0.7874																					-0.1102	-0.1102	-0.1102	-0.1102	-0.1102	-0.1102	-0.1102	-0.1102	-0.1102	-0.1102	-0.5802	-0.8623	-0.8623
YAL039C	CYC3	-0.6154	-0.6154	-0.6154	-0.6154						-0.719	-0.719	-0.719	-0.719	-0.719	-0.719	-0.719	-0.719	-0.719	-0.719	-0.719	-0.719	-0.719	-0.719	-0.719	-0.719	-0.719	-0.719
YKR013W	PRY2											-0.8071	-0.8071	-0.8071	-0.8071	-0.8071	-0.8071	-0.8071	-0.8071	-0.8071	-0.8071	-0.8071	-0.8071	-0.8071	-0.8071	-0.8071	-0.8071	-0.8071	-0.8071	-0.8071
YDR260C	SWM1						-0.3742	-0.3742	-0.3742	-0.3742	-0.3742	-0.3742	-0.3742	-0.3742	-0.3742	-0.3742				-0.9891	-0.9891	-0.9891	-0.9891	-0.9891	-0.9891	-0.9891	-0.9891	-0.9891	-0.9891	-0.9891	-0.9891																-0.0587	-0.0587	-0.0587
YER018C	SPC25	-0.1622	-0.1622	-0.1622	-0.1622	-0.1622	-0.1622	-0.2349	-0.4529	-0.4529	-0.4529	-0.4529	-0.4529	-0.4529	-0.4529	-0.4529	-0.4529	-0.4529	-0.4529	-0.4529	-0.4529	-0.4529	-0.4529	-0.4529	-0.4529	-0.4529						-0.6801	-0.6801	-0.6801	-0.6801	-0.6801	-0.6801	-0.6801	-0.6801	-0.6801	-0.6801	-0.6801	-0.6801
YNL146W		-1.0262	-1.0262	-1.0262	-1.0262	-1.0262	-1.0262											-0.3831	-0.3831	-0.3831	-0.3831	-0.3831	-0.3831	-0.3831	-0.3831	-0.3831	-0.3831
YKL060C	FBA1
YPL056C							-0.7847	-0.7847	-0.7847	-0.7847	-0.7847	-0.7847	-0.7847	-0.7847	-0.7847	-0.7847	-0.7847	-0.7847				-0.9915	-0.9915	-0.9915	-0.9915	-0.9915	-0.9915	-0.9915	-0.9915	-0.9915	-0.9915	-1.0954	-1.0954	-1.0954	-1.0954	-1.0954	-1.0954	-1.0954	-1.0954	-1.0954	-1.0954	-1.0954	-1.0954
YBR071W		-0.5332	-0.6668	-0.6668	-0.6668	-0.6668	-0.6668	-0.6668	-0.6668	-0.6668	-0.6668	-0.6668	-0.6668	-0.6668	-0.6668	-0.7763	-0.7763	-0.7763	-0.7763	-0.7763	-0.7763	-0.7763	-0.7763	-0.7763	-0.7763	-0.7763	-0.7763	-0.7763	-0.7763																-1.3448	-1.3448	-1.3448	-1.3448	-1.3448
YOL126C	MDH2
YML007C-A		0.6919	0.6919	0.6919	0.6919	1.4857	1.4857	1.4857	1.4857	1.4857	1.4857	1.4857	1.4857	1.4857	1.4857																														-0.9067	-0.9067	-0.9067	-0.9067	-0.9067
YOR344C	TYE7
YOR083W	WHI5	-0.0097	-0.0097	-0.0097	-0.0097	-0.0097	-0.0097	-0.0097	-0.0097	-0.0097	-0.0097	-0.0097	-0.0097	-0.0097	-0.0097	-0.0097	-0.1467	-0.238	-0.238	-0.238	-0.238	-0.238	-0.238	-0.238	-0.238	-0.238	-0.238	-0.238	-0.238	-0.238	-0.238	-0.238	-0.238
YGR203W		-0.9294	-0.9294	-0.9294			-1.2759	-1.2759	-1.2759	-1.2759	-1.2759	-1.2759	-1.2759	-1.2759	-1.2759	-1.2759	-1.2759
YGL103W	RPL28	-0.3401	-0.3401	-0.3401	-0.3401			-1.2392	-1.2392	-1.2392	-1.2392	-1.2392	-1.2392	-1.2392	-1.2392	-1.2392	-1.2392	-1.2392	-1.2392	-1.2392	-1.2392	-1.2392	-1.2392
YMR122W-A		-1.4822	-1.4822	-1.4822	-1.4822	-1.4822	-1.4822	-1.4822	-1.4822	-1.4822	-1.4822	-1.4822	-1.4822																																-0.2546	-0.2546	-0.2546	-0.2546	-0.2546
YNL300W	TOS6	-1.3675	-1.3675	-1.3675	-1.3675	-1.3675	-1.3675	-1.3675	-1.3675	-1.3675	-1.3675													-1.4992	-1.4992	-1.4992	-1.4992	-1.4992	-1.4992	-1.4992	-1.4992	-1.4992	-1.4992	-1.4992	-1.4992	-1.4992	-1.4992	-1.4992	-1.4992					-1.5441	-1.5441	-1.5441	-1.5441	-1.5441	-1.5441
YJL158C	CIS3	-1.2423	-1.2423	-1.2423	-1.2423	-1.2423	-1.2423	-1.2423	-1.2423	-1.2423	-1.2423
YJR048W	CYC1																																		-0.9196	-0.9196	-0.9196	-0.9196	-0.9196	-0.9196	-0.9196	-0.9196	-0.9196	-0.9196	-0.9196
YML028W	TSA1	-0.3775	-0.3775	-0.723	-1.0684	-1.0684	-1.0684	-1.0684	-1.0684	-1.0684	-1.0684	-1.0684	-1.0684	-1.0684	-1.1228	-1.1591	-1.1591	-1.1591	-1.1591	-1.1591	-1.1591	-1.1591	-1.1591	-1.1591	-1.1591	-1.1591	-1.1591	-1.1591	-1.1591	-1.1591	-1.1591	-1.1591	-0.9067	-0.9067	-0.9067	-0.9067	-0.9067	-0.9067	-0.9067	-0.9067	-0.9067	-0.9067	-0.9067	-0.9067	-0.9991	-1.1224	-1.1224	-1.1224	-1.1224
YDR345C	HXT3
YLR100W	ERG27	-0.8648	-0.8648	-0.8648	-0.8648	-0.8648	-0.8648	-0.8648	-0.8648	-0.8648	-0.8648	-0.8648								-0.9924	-0.9924	-0.9924	-0.9924	-0.9924	-0.9924	-0.9924	-0.9924	-0.9924	-0.9924	-0.9924	-0.9924	-0.9924	-1.0439	-1.0587	-1.0587	-1.0587	-1.0587	-1.0587	-1.0587	-1.0587	-1.0587	-1.0587
YLR300W	EXG1
YIL056W	VHR1																											-1.7912	-1.7912	-1.7912	-1.7912	-1.7912	-1.7912	-1.7912	-1.7912	-1.7912	-1.7912	-1.7912	-1.7912	-1.7912						-1.8719	-1.8719	-1.8719	-1.8719
YDR050C	TPI1	-0.5512	-0.5512	-0.5512	-0.5512	-0.5512	-0.5512	-0.5512
YNL190W		-0.8425	-0.8425	-0.8425
YGR060W	ERG25														-1.3723	-1.3723	-1.3723	-1.3723	-1.3723	-1.3723	-1.3723	-1.3723	-1.3723	-1.3723	-1.3723	-1.3723	-1.3723	-1.3723	-1.3723
YLR110C	CCW12
YDR022C	CIS1								-0.7367	-0.7367	-0.7367	-0.7367	-0.7367	-0.7367	-0.7367	-0.7367	-0.7367	-0.7367	-0.7367	-0.7367	-0.7367	-0.7367	-1.3217	-1.3217	-1.3217	-1.3217	-1.3217	-1.3217	-1.3217	-1.3217	-1.3217	-1.3217	-1.3217	-1.3217	-1.3217	-1.3217
YLR413W					-0.9067	-0.9067	-0.9067	-0.9067	-0.9067	-0.9067	-0.9067	-0.9067	-0.9067	-0.9067	-0.9067	-0.9067	-0.9067	-0.9067	-0.9067	-0.9067	-0.9067	-0.9067	-0.9067
YCL025C	AGP1																																			-1.5347	-1.5347	-1.5347	-1.5347	-1.5347	-1.5347	-1.5347	-1.5347	-1.5347	-1.5347	-1.5347	-1.0702	-1.0702	-1.0702
YMR043W	MCM1	-1.0587	-1.0587					-1.7888	-1.7888	-1.7888	-1.7888	-1.7888	-1.7888	-1.7888	-1.7888	-1.7888	-1.7888	-1.7888
YMR042W	ARG80				-0.4529	-0.4529	-0.4529	-0.4529	-0.4529	-0.4529	-0.4529	-0.4529	-0.4529	-0.4529	-0.4529	-0.4529	-0.4529	-0.4529
YAL038W	CDC19
YHR094C	HXT1
YBR111W-A	SUS1	0.2231				0.4438	0.4438	0.4438	0.4438	0.4438	0.4438	0.4438	0.4438	0.4438	0.4438	0.4438	0.4438	0.4438	0.4438	0.4438	0.4438	0.4438	-0.3612	-0.3612	-0.3612	-0.3612	-0.3612	-0.3612	-0.3612	-0.3612	-0.3612	-0.3612	-0.3762	-0.4212	-0.4212	-0.4212	-0.4212	-0.4212	-0.4212	-0.4212	-0.4212	-0.4212	-0.4212	-0.4212	-0.4212			-0.6436	-0.6436
YDR073W	SNF11																														-1.0807	-1.0807	-1.0807	-1.0807	-1.0807	-1.0807	-1.0807	-1.0807	-1.0807	-1.0807	-1.0807	-0.5847	-0.5847	-0.5847	-0.5847	-0.5847	-0.5847	-0.5847	-0.5847
YPL250C	ICY2	-0.7665	-1.6397	-1.7367	-1.7367	-1.7367	-1.7367	-1.7367	-1.7367	-1.7367	-1.7367	-1.7367	-1.7367	-1.7367	-1.7367	-1.7367	-1.7367	-1.7367	-1.7367														-0.9497	-0.9497	-0.9497	-0.9497	-0.9497	-0.9497	-0.9497	-0.9497	-0.9497	-0.9497	-0.9497	-1.0344	-1.0344	-1.0344	-1.0344	-1.0344	-1.0344
YNL104C	LEU4	-0.3997	-0.3997	-0.3997	-0.3997	-0.4165	-0.5505	-0.5505	-0.5505	-0.5505	-0.5505	-0.5505	-0.5505	-0.5505	-0.5505	-0.5505	-0.5505	-0.5505	-0.5505	-0.5505											-0.2014	-0.2014	-0.2014	-0.2014	-0.2014	-0.2014	-0.2014	-0.2014	-0.2014	-0.2014	-0.2014	-0.2014	-0.2014	-0.2014	-0.2014	-0.2014	-1.0052	-1.0052	-1.0052
YIL132C	CSM2	-0.5143	-0.5143	-0.5143	-0.5143							-0.3394	-0.3394	-0.3394	-0.3394	-0.3394	-0.3394	-0.3394	-0.3394	-0.3394	-0.3394	-0.3394	-0.3394	-0.3394	-0.3394	-0.3394	-0.3394	-0.3394						-1.5847	-1.5847	-1.5847	-1.5847	-1.5847	-1.5847	-1.5847	-1.5847	-1.5847	-1.5847	-1.5847	-1.5847		-0.6675	-0.6675	-0.6675
YNL327W	EGT2	-0.8719	-0.8719	-0.8719	-0.8719	-0.3217	-0.3217	-0.3217	-0.3217	-0.3217	-0.3217	-0.3217	-0.3217	-0.3217	-0.3217														-0.7742	-0.7742	-0.7742	-0.7742	-0.7742	-0.7742	-0.7742	-0.7742	-0.7742	-0.7742
YNL148C	ALF1								-1.0262	-1.0262	-1.0262	-1.0262	-1.0262	-1.0262	-1.0262	-1.0262	-1.0262	-1.0262	-1.0262	-1.0262		-0.716	-0.716	-0.716	-0.716	-0.716	-0.716	-0.716	-0.716	-0.716	-0.716	-0.716	-0.716	-0.716	-0.716	-0.716	-0.716	-0.716
YOL110W	SHR5					-0.1803	-0.1803	-0.1803	-0.1803	-0.1803	-0.1803	-0.1803	-0.1803	-0.1803	-0.1803	-0.1803	-0.1803	-0.1803	-0.1803	-0.1737	-0.1136	-0.1136	-0.1136	-0.1136	-0.1136	-0.1136	-0.1136	-0.1136	-0.1136	-0.1136	-0.1136	-0.028	-0.028	-0.028	-0.028	-0.028	-0.028	-0.028	-0.028	-0.028	-0.028
YNR002C	ATO2	-0.8226	-0.8226	-0.8226	-0.8226	-0.8226	-0.8226	-0.8226	-0.8226	-0.8226	-0.8226	-0.8226								-0.4698	-0.4698	-0.4698	-0.4698	-0.4698	-0.4698	-0.4698	-0.4698	-0.4698	-0.4698	-0.4698		-1.1985	-1.1985	-1.1985	-1.1985	-1.1985	-1.1985	-1.1985	-1.1985	-1.1985	-1.1985	-1.1985	-1.1985	-1.1985	-1.1985	-0.0943	-0.0943	-0.0943	-0.0943
YCR010C	ADY2	-1.2174	-1.2174	-1.2174			-0.0766	-0.0766	-0.0766	-0.0766	-0.0766	-0.0766	-0.0766	-0.0766	-0.0766	-0.0766	-0.0766	-0.0766		-0.8402	-0.8402	-0.8402	-0.8402	-0.8402	-0.8402	-0.8402	-0.8402	-0.8402	-0.8402	-0.8402	-0.8402	-0.8402	-0.8402	-0.8402	-0.8402	-0.8402	-0.5661	-0.5661	-0.5661	-0.5661	-0.5661	-0.5661	-0.5661	-0.5661	-0.5661	-0.5661	-1.1448	-1.1448	-1.1448
YPR192W	AQY1	-1.1904	-1.1904	-1.1904	-1.1904	-1.1904	-1.1904	-1.1904											-0.2457	-0.2457	-0.2457	-0.2457	-0.2457	-0.2457	-0.2457	-0.2457	-0.2457	-0.2457	-0.2457	-0.2457	-0.2457	-0.2457	-0.2457	-0.2457	-0.2457	-0.2457		-1.0124	-1.0124	-1.0124	-1.0124	-1.0124	-1.0124	-1.0124	-1.0124	-1.0124	-1.0124	-1.0124	-1.0124
YOL143C	RIB4			0.2778	0.2778	0.2778	0.2778	0.2778	0.2778	0.2778	0.2778	0.2778	0.2778	0.2778	0.2778	0.2778	0.2778	0.2778	0.2778	0.2778			-1.0156	-1.0156	-1.0156	-1.0156	-1.0156	-1.0156	-1.0156	-1.0156	-1.0156	-1.0156	-1.0156	-1.0156	-1.0156	-1.0156	-1.0156	-1.0156						-0.8593	-0.8593	-0.8593	-0.8593	-0.8593	-0.8593
YGL096W	TOS8																							-0.6909	-0.6909	-0.6909	-0.6909	-0.6909	-0.6909	-0.6909	-0.6909	-0.6909	-0.6909	-0.6909	-0.6909	-0.6909	-0.6909									-0.5847	-0.5847	-0.5847	-0.5847
YIL015W	BAR1	-0.6257	-0.6257	-0.6257	-0.6257	-0.6257
YJL127C-B		-1.0872	-1.0872	-1.0872	-1.0872	-1.0872	-1.0872	-1.0872	-1.0872								-1.2392	-1.2392	-1.2392	-1.2392	-1.2392	-1.2392	-1.2392	-1.2392	-1.2392	-1.2392	-0.5947	-0.5947	-0.5947	-0.5947	-0.5947	-0.5947	-0.5947	-0.5947	-0.5947	-0.5947	-0.5947	-0.5947	-0.5947	-0.5947	-0.5947	-0.5947	-0.5947	-0.5947	-0.5947	-1.0931	-1.0931	-1.0931	-1.0931
YEL059C-A	SOM1	-0.3756	-0.3756							-0.1224	-0.1224	-0.1224	-0.1224	-0.1224	-0.1224	-0.1224	-0.1224	-0.1224	-0.1224	-0.1224	-0.1224	-0.1224	-0.1224	-0.1224	-0.8468	-0.8468	-0.8468	-0.8468	-0.8468	-0.8468	-0.8468	-0.8468	-0.8468	-0.8468	-0.8468	-0.8468	-0.8468	-0.8468	-0.8468	-0.8468	-0.8468
YLR154C	RNH203
YGR254W	ENO1																										-1.6265	-1.6265	-1.6265	-1.6265	-1.6265	-1.6265	-1.6265	-1.6265	-1.6265	-1.6265	-1.6265	-1.6265	-1.6265	-1.6265	-1.6265	-1.6265	-1.6265
YNL289W	PCL1	-0.7653	-0.7653	-0.7653	-0.7653	-0.7653	-0.7653	-0.7653	-0.7653	-0.7653																																	-0.9829	-0.9829	-0.9829	-0.9829	-0.9829	-0.9829	-0.9829
YPR037C	ERV2				0.6622	0.6622	0.6622	0.6622	0.6622	0.6622	0.6622	0.6622	0.6622	0.6622	0.6622						0.6043	0.6043	0.6043	0.6043	0.6043	0.6043	0.6043	0.6043	0.6043	0.6043	0.6043	0.6043	0.6043	0.6043	0.6043	0.6043	0.6043
YLR167W	RPS31	-0.6605	-0.6605	-0.6605								0.4153	0.4153	0.4153	0.4153	0.4153	0.4153	0.4153	0.4153	0.4153	0.4153	0.4153
YER072W	VTC1			-1.0738	-1.0738	-1.0738	-1.0738	-1.0738	-1.0738	-1.0738	-1.0738	-1.0738	-1.0738	-1.0738	-1.0738
YAL005C	SSA1	-0.9807	-0.9807																																														-1.5143
YJL191W	RPS14B	-0.2342	-0.2342	-0.2342	-0.2342		-1.0587	-1.0587	-1.0587	-1.0587	-1.0587	-1.0587	-1.0587	-1.0587	-1.0587	-1.0587	-1.0587	-1.0587	-1.0587	-1.0587	-1.0587	-1.0587
YGR280C	PXR1	-0.6668	-0.4615	-0.4273	-0.4273	-0.4273	-0.4273	-0.4273	-0.4273	-0.4273	-0.4273	-0.4273	-0.4273	-0.4273	-0.4273	-0.4273	-0.4273	-0.4273	-0.4273	-1.2392	-1.2392	-1.2392	-1.2392	-1.2392	-1.2392	-1.2392	-1.2392	-1.2392	-1.2392	-1.2392	-1.2392
YDL085C-A		-0.4058	-0.4058	-0.4058	-0.4058	-0.4058	-0.4058	-0.4058	-0.4058	-0.4058	-0.4058	-0.4058	-0.4058								-0.4403	-0.4403	-0.4403	-0.4403	-0.4403	-0.4403	-0.4403	-0.4403	-0.4403	-0.4403	-0.4403	-0.4403	-0.4403	-0.4403	-0.4403	-0.4403	-0.4403	-0.4403	-0.5281	-0.5281	-0.5281	-0.5281	-0.5281	-0.5281	-0.5281	-0.5281	-0.5281	-0.5281	-0.6696
YDL055C	PSA1	-1.0442	-1.0442	-1.0442	-1.0442	-1.0442	-1.0442
YPR151C	SUE1	-0.1892	-0.1892	-0.1892	-0.1892	-0.1892	-0.1892	-0.1892	-0.1892	-0.1892	-0.1892	-0.1892			-0.6099	-0.6099	-0.6099	-0.6099	-0.6099	-0.6099	-0.6099	-0.6099	-0.6099	-0.6099	-0.6099	-0.6099	-0.6099	-0.6099	-0.6099	-0.0541	0.0076	0.0076	0.0076	0.0076	0.0076	0.0076	0.0076	0.0076	0.0076
YER146W	LSM5	-0.3714									-0.9432	-0.9432	-0.9432	-0.9432	-0.9432	-0.9432	-0.9432	-0.9432	-0.9432	-0.9432	-0.9432	-0.9432	-0.9432	-0.9432	-0.9432	-1.5627	-1.5627	-1.5627	-1.5627	-1.5627	-1.5627	-1.5627	-1.5627	-1.5627	-1.5627	-1.5627	-1.5627	-1.5627	-1.5627	-1.5627	-1.5627	-1.5627	-1.2477	-1.2477	-1.2477	-1.2477	-1.2477	-1.2477	-1.2477
YFR034C	PHO4	-0.8141	-0.8141	-0.8141	-0.8141	-0.8141	-0.8141	-0.8141	-0.8141	-0.8141	-0.8141	-0.8141	-0.8141	-0.8141	-0.8141	-0.8141	-0.8141		-1.253	-1.253	-1.253	-1.253	-1.253	-1.253	-1.253	-1.253	-1.253	-1.253	-1.253	-1.253	-1.253																-0.9193	-0.9193	-0.9193
YMR011W	HXT2																														-1.2265	-1.2265	-1.2265	-1.2265	-1.2265	-1.2265	-1.2265	-1.2265	-1.2265	-1.2265	-1.2265	-1.2265	-1.2265	-1.2265	-1.2265	-1.2265	-1.2265	-1.2265
YGR161W-C					-1.2869	-1.2869	-1.2869	-1.2869	-1.2869	-1.2869	-1.2869	-1.2869	-1.2869	-1.2869	-1.2869	-1.2869	-1.2869	-1.2869	-1.2869	-1.2869	-1.2869	-1.2869	-1.2869																							-1.129	-1.129	-1.129	-1.129
YPR065W	ROX1																									-0.3217	-0.3217	-0.3217	-0.3217	-0.3217	-0.3217	-0.3217	-0.3217	-0.3217	-0.3217
YPL024W	RMI1																																															-1.4647	-1.4647
YGL135W	RPL1B								-0.4661	-0.4661	-0.4661	-0.4661	-0.4661	-0.4661	-0.4661	-0.4661	-0.4661	-0.4661	-0.4661	-0.4661	-0.4661	-0.4661	-0.4661	-0.4661	-0.4661	-0.4661																						-0.0322	-0.0322
YER070W	RNR1							-0.3217	-0.3217	-0.3217	-0.3217	-0.3217	-0.3217	-0.3217	-0.3217	-0.3217	-0.3217	-0.3217	-0.3217	-0.3217	-0.3217	-0.3217	-0.3217	-0.3217																						-0.8811	-0.8811	-0.8811	-0.8811
YNL277W-A		-0.6198	-0.6198	-0.6198	-0.6198	-0.6198	-0.6198	-0.707	-0.707	-0.707	-0.707	-0.707	-0.707	-0.707	-0.707	-0.707	-0.707	-0.7202	-0.7202	-0.7202	-0.7202	-0.7202	-0.7202	-0.7202	-0.7202	-0.7202	-0.7219	-0.7367	-0.7367	-0.7367	-0.7367	-0.7367	-0.7367	-0.7367	-0.7367	-0.7367	-0.7367	-0.7367	-0.7367	-0.7367
YPL177C	CUP9
YPR149W	NCE102
YPL055C	LGE1	-0.3217	-0.3217	-0.3217	-0.3217	-0.3217	-0.3217	-0.3217	-0.3217	-0.3217				-0.7534	-0.7534	-0.7534	-0.7534	-0.7534	-0.7534	-0.7534	-0.7534	-0.7534	-0.7534	-0.7534	-0.7534	-0.7534	-0.7534	-0.7534																	-1.0262	-1.0262	-1.0262	-1.0262	-1.0262
YNR017W	TIM23	-0.7202	-0.7202	-0.7202	-0.7202	-0.7456	-0.9738	-0.9738	-0.9738	-0.9738	-0.9738	-0.9738	-0.9738	-0.9738	-0.9738	-0.9738	-0.9738	-0.9738																					-1.2501	-1.2501	-1.2501	-1.2501	-1.2501	-1.2501	-1.2501	-1.2501	-1.2501	-1.2501	-1.2501
YDL182W	LYS20																																			-1.2244	-1.2244	-1.2244	-1.2244	-1.2244	-1.2244	-1.2244	-1.2244	-1.2244	-1.2244	-1.2244	-1.2244	-1.2315	-1.2423
YBR052C	RFS1				-0.2717	-0.2717	-0.2717	-0.2717	-0.2717	-0.2717	-0.2717	-0.2717	-0.2717	-0.2717	-0.2717	-0.2608	-0.1634	-0.1634	-0.1634	-0.1634	-0.1634	-0.1634	-0.1634	-0.1634	-0.1634	-0.1634	-0.1634	-0.3627	-0.3627	-0.3627	-0.3627	-0.3627	-0.3627	-0.3627	-0.3627	-0.3627	-0.3627
YER131W	RPS26B	-0.4019	-0.4019	-0.4019				-1.1201	-1.1201	-1.1201	-1.1201	-1.1201	-1.1201	-1.1201	-1.1201	-1.1201	-1.1201	-1.1201
YHR136C	SPL2																				-1.4813	-1.4813	-1.4813	-1.4813	-1.4813	-1.4813	-1.4813	-1.4813	-1.4813	-1.4813	-1.4813	-1.4813	-1.4813	-1.4813	-1.4813	-1.4813	-1.4813											-0.9067	-0.9067
YOL086W-A			-0.2759	-0.2759	-0.2759	-0.2759	-0.2759	-0.2759	-0.2759	-0.2759	-0.2759	-0.2759	-0.2759	-0.2759	-0.2759	-0.2759	0.1898	0.1898	0.1898	0.1898	0.1898	0.1898	0.1898	0.1898	0.1898	0.1898	0.1898	0.1898	-0.0768	-0.2546	-0.2546	-0.2546	-0.2546	-0.2546	-0.2546	-0.2546	-0.2546	-0.2546	-0.2546	-0.2546	-0.2546	-0.2546	-0.2546	-0.2546	-0.2546
YHR097C		-1.1016	-1.1016	-1.1016	-1.1016	-1.1016	-1.1016	-1.1016	-1.1016	-1.1016	-1.1016	-1.1016	-1.1016	-1.1016	-1.1016	-1.1016				-0.7036	-0.7036	-0.7036	-0.7036	-0.7036	-0.7036	-0.7036	-0.7036	-0.7036	-0.7036	-0.7036	-0.7036	-0.7036	-0.7036	-0.7036	-0.7036	-0.7036	-0.7036			-0.4916	-0.4916	-0.4916	-0.4916	-0.4916	-0.4916	-0.4916	-0.4916	-0.4916	-0.4916
YOR348C	PUT4																													-2.1083	-2.1083	-2.1083	-2.1083	-2.1083	-2.1083	-2.1083	-2.1083	-2.1083	-2.1083	-2.1083	-2.1083	-2.1083	-2.1083	-2.1083
YKL217W	JEN1											-1.0807	-1.0807	-1.0807	-1.0807	-1.0807	-1.0807	-1.0807	-1.0807	-1.0807	-1.0807	-1.0807	-1.0807	-1.0807	-1.0807	-1.0807	-1.0822	-1.0842	-1.0842	-1.0842	-1.0842	-1.0842	-1.0842	-1.0842	-1.0842	-1.0842	-1.0842	-1.0842	-1.0842	-1.0842	-1.0842	-1.0842	-1.0842	-1.0842	-1.0842
YOL005C	RPB11	0.5764	0.5764	0.5764							0.3214	0.3214	0.3214	0.3214	0.3214	0.3214	0.3214	0.3214	0.3214	0.3214	0.3214	0.3214	0.3214	0.3214	0.2701	0.2189	0.2189	0.2189	0.2189	0.2189	0.2189	0.2189	0.2189	0.2189	0.2189	-0.6696	-0.6696	-0.6696	-0.6696	-0.6696	-0.6696	-0.6696	-0.6696	-0.6696	-0.6696	-0.6696		-1.1753	-1.1753
YPL017C	IRC15	-0.651	-0.651	-0.651	-0.651	-0.651	-0.651	-0.651	-0.651	-0.651	-0.651	-0.651			-0.6696	-0.6696	-0.6696	-0.6696	-0.6696	-0.6696	-0.6696	-0.6696	-0.6696	-0.6696	-0.6696	-0.6696	-0.6696	-0.6696	-0.6696	-0.6696	-0.6696
YFL026W	STE2	-0.3482	-0.3482			-0.4058	-0.4058	-0.4058	-0.4058	-0.4058	-0.4058	-0.4058	-0.4058	-0.4058	-0.4058	-0.4058	-0.4058	-0.4058			-0.5696	-0.5696	-0.5696	-0.5696	-0.5696	-0.5696	-0.5696	-0.5696	-0.5696	-0.5696	-0.5696	-0.5696	-0.5696	-0.5696	-0.5696	-0.5696	-0.5696	-0.5696
YLR109W	AHP1			-0.7942	-0.7942	-0.7942	-0.7942	-0.7942	-0.7942	-0.7942	-0.7942	-0.7942	-0.7942	-0.7942	-0.7942	-0.7942	-0.7942	-0.7942	-0.7942	-0.7942
YIR018C-A																																										-0.7692	-0.7692	-0.7692	-0.7692	-0.7692	-0.7692	-0.7692	-0.7692
YDR276C	PMP3			-1.0035	-1.0035	-1.0035	-1.0035	-1.0035	-1.0035	-1.0035	-1.0035	-1.0035	-1.0035	-1.0035	-1.0035	-1.0035	-1.0035	-1.0035	-1.0035	-1.0035
YMR038C	CCS1	-0.2148	-0.2148	-0.2148	-0.2148	0.1113	0.1113	0.1113	0.1113	0.1113	0.1113	0.1113	0.1113	0.1113	0.1113	0.1113	0.1113	0.1113	0.1113	0.1113	0.1113	0.1113
YDL169C	UGX2						-0.3831	-0.3831	-0.3831	-0.3831	-0.3831	-0.3831	-0.3831	-0.3831	-0.3831	-0.3831	-0.3831	-0.3831	-0.3831	-0.3831									-0.716	-0.716	-0.716	-0.716	-0.716	-0.716	-0.716	-0.716	-0.716	-0.716	-0.716	-0.716	-0.716	-0.716	-0.716	-0.716	-0.716	-0.1466	-0.1466	-0.1466	-0.1466
YBR067C	TIP1	0.0933	0.0933	0.0933	0.0933	0.0933	0.0933								-0.8242	-0.8242	-0.8242	-0.8242	-0.8242	-0.8242	-0.8242	-0.8242	-0.8242	-0.8242	-0.8242	-0.8242	-0.8242	-0.8242	-0.8242					-0.5281	-0.5281	-0.5281	-0.5281	-0.5281	-0.5281	-0.5281	-0.5281	-0.5281	-0.5281	-0.5281	-1.0943	-1.0943	-1.0943	-1.0943	-1.0943
YIR017C	MET28	-0.368	-0.368			-0.1365	-0.1365	-0.1365	-0.1365	-0.1365	-0.1365	-0.1365	-0.1365	-0.1365	-0.1365	-0.1365	-0.1365	-0.1365	-0.1365	-0.1587	-0.2477	-0.2477	-0.2477	-0.2477	-0.2477	-0.2477	-0.2477	-0.2477	-0.2477	-0.2477	-0.2477	-0.2477	-0.2477	-0.2477	-0.2477	-0.2477	-0.2477	-0.2477
YMR195W	ICY1																																									-0.9384	-0.9384	-0.9384	-0.9384	-0.9384	-0.9384	-0.9384	-0.9384
YGR121C	MEP1					-0.9549	-0.9549	-0.9549	-0.9549	-0.9549	-0.9549	-0.9549	-0.9549	-0.9549	-0.9549	-0.9549														-0.9331	-0.9331	-0.9331	-0.9331	-0.9331	-0.9331	-0.9331	-0.9331	-0.9331	-0.9331	-0.9331	-0.9331	-0.9331	-0.9331						-0.5847
YMR251W-A	HOR7	-1.0738	-1.0738	-1.0664	-1.0664	-1.0664	-1.0664	-1.0664	-1.0664	-1.0664	-1.0664	-1.0664	-1.0664	-1.0664	-1.0664	-1.0664	-1.0664	-1.0664	-1.0664																-1.3723	-1.3723	-1.3723	-1.3723	-1.3723	-1.3723	-1.3723	-1.3723	-1.3723	-1.3723	-1.3723	-1.3723	-1.3723	-1.3723	-1.3723
YDR233C	RTN1	0.144	0.144	0.144	0.144	0.144	0.144
YOR084W	LPX1					-0.5804	-0.5804	-0.5804	-0.5804	-0.5804	-0.5804	-0.5804	-0.5804	-0.5804	-0.5804	-0.5804		-1.0778	-1.0778	-1.0778	-1.0778	-1.0778	-1.0778	-1.0778	-1.0778	-1.0778	-0.9213	-0.5562	-0.5562	-0.5562	-0.5562	-0.5562	-0.5562	-0.5562	-0.5562	-0.5562	-0.5562	-0.5562									-0.3695	-0.3695	-0.3695
YJL079C	PRY1	-0.6972	-0.6972	-0.6972	-0.6972	-0.6972	-0.6972	-0.6972	-0.6972	-0.6972	-0.6972										-0.7938	-0.7938	-0.7938	-0.7938	-0.7938	-0.7938	-0.7938	-0.7938	-0.7938	-0.7938	-0.7938	-0.7938	-0.7938	-0.7938	-0.7938	-0.7938	-0.7938	-0.7938	-0.7938									-0.2315	-0.2315
YGR031W					0.1564	0.1564	0.1564	0.1564	0.1564	0.1564	0.1564	0.1564	0.1564	0.1564	0.1564	0.1564	0.1564	-0.0434	-0.8425	-0.8425	-0.8425	-0.8425	-0.8425	-0.8425	-0.8425	-0.8425	-0.8425	-0.8425	-0.8425	-0.8425
YCL058W-A		0.407	0.407	0.407	0.407	0.407			0.0518	0.0518	0.0518	0.0518	0.0518	0.0518	0.0518	0.0518	0.0518	0.0518	0.0518		-0.2931	-0.2931	-0.2931	-0.2931	-0.2931	-0.2931	-0.2931	-0.2931	-0.2931	-0.2931	-0.2931	-0.2931	-0.2931	-0.2931	-0.2931	-0.2931	-0.2931	-0.2931
YFR035C		-1.0943	-1.0943	-1.0943	-1.0943	-1.0943	-1.0157	-0.5441	-0.5441	-0.5441	-0.5441	-0.5441	-0.5441	-0.5441	-0.5441	-0.5441	-0.5441																																-0.8141
YDL130W-A	STF1	-0.0348	-0.0348	-0.0348	-0.0348	-0.0348	-0.0348	-0.0348	-0.0348	-0.0348	-0.0348	-0.0348									-0.5441	-0.5441	-0.5441	-0.5441	-0.5441	-0.5441	-0.5441	-0.5441	-0.5441	-0.5441	-0.5441	-0.5441	-0.5441															-0.5923	-0.5923
YOR327C	SNC2	0.4237	0.4237	0.4237	0.4237	0.4237	0.4237	0.4237	0.4237	-0.3829	-0.6518	-0.6518	-0.6518	-0.6518	-0.6518	-0.6518	-0.6518	-0.6518	-0.6518	-0.6518	-0.6518	-0.6518	0.286	0.286	0.286	0.286	0.286	0.286	0.286	0.286	0.286	0.286	0.286	0.286											-0.5847	-0.5847	-0.5847	-0.5847	-0.5847
YKL086W	SRX1	-0.4975	-0.4975	-0.4975	-0.4975	-0.4975	-0.4975	-0.4975		-0.2342	-0.2342	-0.2342	-0.2342	-0.2342	-0.2342	-0.2342	-0.2342	-0.2342	-0.2342	-0.1913	-0.1269	-0.1269	-0.1269	-0.1269	-0.1269	-0.1269	-0.1269	-0.1269	-0.1269	-0.1269	-0.1269	0.3063	0.3063	0.3063	0.3063	0.3063	0.3063	0.3063	0.3063	0.3063	0.3063	0.3063	0.3063	0.3063
YBR085C-A		-0.2728	-0.2728	-0.2728	-0.2728	-0.2728	-0.2728	-0.2728	-0.2728	-0.2728	-0.2728	-0.2728			-0.7742	-0.7742	-0.7742	-0.7742	-0.7742	-0.7742	-0.7742	-0.7742	-0.7742	-0.7742	-0.7742	-0.7742	-0.7742	-0.5552	-0.4092	-0.4092	-0.4092	-0.4092	-0.4092	-0.4092	-0.4092	-0.4092	-0.4092	-0.4092
YBL001C	ECM15	-0.5358	-0.5358	-0.5358	-0.5358	-0.5358	-0.5358	-0.5358	-0.5358	-0.5358	-0.5358	-0.5358	-0.5358	-0.5358	-0.4437	-0.4437	-0.4437	-0.4437	-0.4437	-0.4437	-0.4437	-0.4437	-0.4437	-0.4437	-0.4437	-0.4437	-0.4437								-1.3921	-1.3921	-1.3921	-1.3921	-1.3921	-1.3921	-1.3921	-1.3921	-1.3921	-1.3921	-1.3921	-1.3921	-1.3921	-1.3921	-1.3921
YKL032C	IXR1																																												-0.3723	-0.3723	-0.3723	-0.3723	-0.3723
YLR139C	SLS1										-1.3031	-1.3031	-1.3031	-1.3031	-1.3031	-1.3031	-1.3031	-1.3031	-1.3031	-1.3031	-1.3031	-1.3031	-1.3031	-1.3031					-1.553	-1.553	-1.553	-1.553	-1.553	-1.553	-1.553	-1.553	-1.553	-1.553	-1.553	-1.553	-1.553	-1.553	-1.553	-1.553
YER145C	FTR1				-1.5	-1.5	-1.5	-1.5	-1.5	-1.5	-1.5	-1.5	-1.5	-1.5	-1.5	-1.5	-1.5	-1.5	-1.5	-1.5															-1.2477	-1.2477	-1.2477	-1.2477	-1.2477	-1.2477	-1.2477	-1.2477	-1.2477	-1.2477	-1.2477	-1.5627	-1.5627	-1.5627	-1.5627
YKL185W	ASH1	-0.9591	-0.9591	-0.9591	-0.9591	-0.9591	-0.9591	-0.9591																						-0.7523	-0.7523	-0.7523	-0.7523	-0.7523	-0.7523	-0.7523	-0.7523	-0.7523	-0.7523	-0.7523	-0.7523	-0.7523	-0.7523	-0.7523	-0.7523
YBR070C	ALG14	-0.9154	-0.9154	-0.9154	-0.9154	-0.9154	-0.9154	-0.9154	-0.9154	-0.9154	-0.9154	-0.9154			-1.3448	-1.3448	-1.3448	-1.3448	-1.3448	-1.3448	-1.3448	-1.3448	-1.3448	-1.3448	-1.3448	-1.3448	-1.3448	-1.3448	-1.3448	-1.3448	-1.3448	-1.3448																-0.7763	-0.7763
YDR379C-A		-0.9777	-0.9777	-0.9777	-0.9777	-0.9777	-0.9777	-0.6961	-0.6961	-0.6961	-0.6961	-0.6961	-0.6961	-0.6961	-0.6961	-0.6961	-0.6961	-0.6961	-0.6961	-0.6961	-0.6961	-0.6961	-0.6961	-0.6961	-0.6961	-0.6961			-1.5298	-1.5298	-1.5298	-1.5298	-1.5298	-1.5298	-1.5298	-1.5298	-1.5298	-1.5298	-1.5298	-1.5298	-1.5298	-1.5298	-1.5298
YPL111W	CAR1	-1.8742	-1.8742	-1.8742	-1.8742																																					-0.7692	-0.7692	-0.7692	-0.7692	-0.7692	-0.7692	-0.7692	-0.7692
YGL087C	MMS2		-0.0168	-0.0168	-0.0168	-0.0168	-0.0168	-0.0168	-0.0168	-0.0168	-0.0168	-0.0168	-0.0168	-0.0168	-0.0168	-0.0168	-0.0168	-0.0168	-0.0035	-0.0035	-0.0035	-0.0035	-0.0035	-0.0035	-0.0035	-0.0035	-0.0035	-0.0035	-0.0035	-0.0035	-0.0035	-0.0035	-0.0035	-0.0035	-0.0035	-0.0035												-0.4472	-0.4472
YPL081W	RPS9A						-0.9915	-0.9915	-0.9915	-0.9915	-0.9915	-0.9915	-0.9915	-0.9915	-0.9915	-0.9915	-0.9915	-0.9915	-0.9915	-0.9915	-0.9915	-0.9915	-0.9915	-0.9915
YCL005W-A	VMA9	0.1083	0.1083	0.1083	0.1083	0.1083	0.1083	0.1083	0.1083	0.1083	0.1083	0.2498	0.2498	0.2498	0.2498	0.2498	0.2498	0.2498	0.2498	0.2498	0.2498	0.2498	0.2498	0.2498	0.2498	0.2498	0.2498	0.3595	0.3716	0.3716	0.3716	0.3716	0.3716	0.3716	0.3716	0.3716	0.3716	0.3716	0.3716	0.3716	0.3716	0.3716	0.3716	0.6625	1.0503	1.0503	1.0503	1.0503	1.0503
YER159C	BUR6
YBL029C-A																																											-1.552	-1.552	-1.552	-1.552	-1.552	-1.552	-1.552
YPL058C	PDR12	-1.2885	-1.2885	-1.2885	-1.2885	-1.2885	-1.2885	-1.2885	-1.2885	-1.2885	-1.2885	-1.2885	-1.2885	-1.2885	-0.6018	-0.6018	-0.6018	-0.6018	-0.6018	-0.6018	-0.6018	-0.6018	-0.6018	-0.6018	-0.6018
YHR022C-A		0.8344	0.8344	0.8344	0.8344	0.8344	0.8344	0.8344	0.8344	0.8344	0.8344	-0.1401	-0.1401	-0.1401	-0.1401	-0.1401	-0.1401	-0.1401	-0.1401	-0.1401	-0.1401	-0.1401
YPR098C		-0.129	-0.129	-0.129			0.0345	0.0345	0.0345	0.0345	0.0345	0.0345	0.0345	0.0345	0.0345	0.0345	0.0345	0.0345	0.0345	0.0345	0.0345	0.0345	-0.2137	-0.4619	-0.4619	-0.4619	-0.4619	-0.4619	-0.4619	-0.4619	-0.4619	-0.4619	-0.4619
YBL029W																																									-0.7367	-0.7367	-0.7367	-0.7367	-0.7367	-0.7367	-0.7367	-0.7367	-0.7367
YKL183W	LOT5	-0.2096	-0.2096	-0.2096	-0.2096	-0.2096	-0.2096	-0.2096	-0.2096	-0.2096	-0.2096	-0.2096	-0.0158	0.023	0.023	0.023	0.023	0.023	0.023	0.023	0.023	0.023	0.023	0.023	0.023
YEL009C	GCN4	-1.4592	-1.4592	-1.4592	-1.4592	-1.4592	-1.4592	-1.4592	-1.4592
YBR010W	HHT1
YOL109W	ZEO1
YFR031C-A	RPL2A
YCR005C	CIT2	-0.797	-0.797	-0.797	-0.797	-0.797	-0.797	-0.797	-1.1477	-1.1477	-1.1477	-1.1477	-1.1477	-1.1477	-1.1477	-1.1477	-1.1477	-1.1477	-1.1477	-1.1477	-1.1477	-1.1477	-1.1477	-1.1477	-1.1477	-1.1477									-0.9564	-0.9564	-0.9564	-0.9564	-0.9564	-0.9564	-0.9564	-0.9564	-0.9564	-0.9564	-0.9564	-0.9564	-0.9564	-0.9564	-0.9564
YMR175W	SIP18	0.0549	0.0549	0.0549	0.0549	0.0549	0.0549	0.0549	0.0549	0.0549	0.0549	0.0549		-0.9998	-0.9998	-0.9998	-0.9998	-0.9998	-0.9998	-0.9998	-0.9998	-0.9998	-0.9998	-0.9998	-0.9998	-0.9998	-0.9998	-0.9998	-0.9998	-0.9998					-0.5947	-0.5947	-0.5947	-0.5947	-0.5947	-0.5947	-0.5947	-0.5947	-0.5947	-0.5947
YLR437C	DIF1	0.0193	0.0193	-0.8742	-0.8742	-0.8742	-0.8742	-0.8742	-0.8742	-0.8742	-0.8742	-0.8742	-0.8742	-0.8742	-0.8742	-0.8742	-0.8742	-0.8742	-0.8742	-0.8742	-0.8742
YOL059W	GPD2	-0.9998	-0.9998	-0.9998	-0.9998	-0.9998	-0.9998	-0.9998	-0.9998	-0.9998	-0.9998	-0.9998	-1.1508	-1.2717	-1.2717	-1.2717	-1.2717	-1.2717	-1.2717	-1.2717	-1.2717	-1.2717																							-0.9702	-0.9702	-0.9702	-0.9702	-0.9702
YOR153W	PDR5
YGR146C														-0.5281	-0.5281	-0.5281	-0.5281	-0.5281	-0.5281	-0.5281	-0.5281	-0.5281	-0.5281	-0.5281	-0.5281		-1.5562	-1.5562	-1.5562	-1.5562	-1.5562	-1.5562	-1.5562	-1.5562	-1.5562	-1.5562	-1.5562	-1.5562	-1.5562	-1.5562	-0.9067	-0.9067	-0.9067	-0.9067	-0.9067	-0.9067	-0.9067	-0.9067	-0.9067
YJR104C	SOD1	-0.9355	-0.9355	-0.9355	-0.9355	-0.9355																								-1.29	-1.29	-1.29	-1.29	-1.29	-1.29	-1.29	-1.29	-1.29	-1.29	-1.29	-1.29	-1.29	-1.29	-1.29	-1.29	-1.29
YIL051C	MMF1	-0.2148							-0.7154	-0.7154	-0.7154	-0.7154	-0.7154	-0.7154	-0.7154	-0.7154	-0.7154	-0.7154	-0.7154	-0.7154	-0.7154	-0.7154		-1.1823	-1.1823	-1.1823	-1.1823	-1.1823	-1.1823	-1.1823	-1.1823	-1.1823	-1.1823	-1.1823
YCR059C	YIH1	-0.1783	-0.1783	-0.1783	-0.1783	-0.1783	-0.1783	-0.1783	-0.1783	-0.1783	-0.1783	-0.1783	-0.1783	-0.1783						0.0836	0.0836	0.0836	0.0836	0.0836	0.0836	0.0836	0.0836	0.0836	0.0836	-0.4521	-0.4521	-0.4521	-0.4521	-0.4521	-0.4521	-0.4521	-0.4521	-0.4521	-0.4521	-0.4521	-0.4521	-0.4521	-0.4521	-0.4521	-0.4521	-0.4521	-0.4521
YOR316C-A		-1.3217	-1.3217	-1.3217	-1.3217	-1.1647	-0.6937	-0.6937	-0.6937	-0.6937	-0.6937	-0.6937	-0.6937	-0.6937	-0.6937	-0.6937	-0.6937	-1.4372	-1.4372	-1.4372	-1.4372	-1.4372	-1.4372	-1.4372	-1.4372	-1.4372	-1.4372	-1.4372
YDR033W	MRH1
YHR005C-A	MRS11						-0.7598	-0.7598	-0.7598	-0.7598	-0.7598	-0.7598	-0.7598	-0.7598	-0.7598	-0.7598	-0.7598	-0.7598	-0.7598	-0.7598
YPL170W	DAP1	-0.4403	-0.4403	-0.4403	-0.4403	-0.4403	-0.4403	-0.3418	-0.2186	-0.2186	-0.2186	-0.2186	-0.2186	-0.2186	-0.2186	-0.2186	-0.2186	-0.2186	-0.2186	-0.2186	-0.2186	-0.2186	-0.2186	-0.2186
YBR054W	YRO2	-1.2261	-1.2261	-1.2261	-1.2261	-1.2261	-1.2261	-1.2261			-1.0587	-1.0587	-1.0587	-1.0587	-1.0587	-1.0587	-1.0587	-1.0587	-1.0587	-1.0587	-1.0587	-1.0587	-1.0587	-1.0587	-1.0587																		0.1219	0.1219	0.1219	0.1219	0.1219	0.1219	0.1219
YAR035W	YAT1																																	-0.8071	-0.8071	-0.8071	-0.8071	-0.8071	-0.8071	-0.8071	-0.8071	-0.8071	-0.8071	-0.8071	-0.8071	-0.8071	-0.8071
YLR073C					-0.4792	-0.4792	-0.4792	-0.4792	-0.4792	-0.4792	-0.4792	-0.4792	-0.4792	-0.4792	-0.7517	-0.7517	-0.7517	-0.7517	-0.7517	-0.7517	-0.7517	-0.7517	-0.7517	-0.7517	-0.7517	-0.7517	-0.7517	-0.7517	-0.7517	-0.7517	-0.7517	-0.7517	-0.7517
YHL025W	SNF6	-0.4313	-0.4313																		-1.1827	-1.1827	-1.1827	-1.1827	-1.1827	-1.1827	-1.1827	-1.1827	-1.1827	-1.1827	-1.1827	-1.1827	-1.1827	-1.1827	-1.1827	-1.1827	-1.3077	-1.3612	-1.3612	-1.3612	-1.3612	-1.3612	-1.3612	-1.3612	-1.3612	-1.1491	-0.6543	-0.6543	-0.6543
YNL231C	PDR16	-0.5959	-0.5959	-0.5959	-0.5959	-0.5959	-0.5959																																					-1.3858	-1.3858	-1.3858	-1.3858	-1.3858	-1.3858
YGL055W	OLE1																			-1.1439	-1.1439	-1.1439	-1.1439	-1.1439	-1.1439	-1.1439	-1.1439	-1.1439	-1.1439	-1.1439	-1.1439	-1.1439	-1.1439	-1.1439	-1.1439	-1.1439	-1.1439	-1.236	-1.236	-1.236	-1.236	-1.236	-1.236	-1.236	-1.236	-1.236	-1.236	-1.236	-1.236
YOL052C-A	DDR2																						-0.593	-0.593	-0.593	-0.593	-0.593	-0.593	-0.593	-0.593	-0.593	-0.593	-0.593	-0.593	-0.593	-0.593	-0.593	-0.593	-0.593								-1.2832	-1.2832	-1.2832
YMR121C	RPL15B			-1.4822	-1.4822	-1.4822	-1.4822	-1.4822	-1.4822	-1.4822	-1.4822	-1.4822	-1.4822	-1.4822	-1.4822	-1.4822	-1.4822	-1.2548	-1.1411	-1.1411	-1.1411	-1.1411	-1.1411	-1.1411	-1.1411	-1.1411	-1.1411	-1.1411	-1.1411	-1.1411	-1.1411
YLR297W		-1.2477	-1.2477	-1.2477	-1.2477	-1.2477	-1.2477	-1.2477		-1.6284	-1.6284	-1.6284	-1.6284	-1.6284	-1.6284	-1.6284	-1.6284	-1.6284	-1.6284	-1.6284	-1.6284	-1.6284	-1.6284	-1.6284	-1.6284	-1.6284
YMR205C	PFK2
YBR072W	HSP26	-1.039	-1.039	-1.039	-1.039	-0.8444	-0.8444	-0.8444	-0.8444	-0.8444	-0.8444	-0.8444	-0.8444	-0.8444	-0.8444	-0.8444			-0.3597	-0.3597	-0.3597	-0.3597	-0.3597	-0.3597	-0.3597	-0.3597	-0.3597	-0.3597	-0.3597	-0.3597	-0.3597	-0.3597	-0.6004	-0.8411	-0.8411	-0.8411	-0.8411	-0.8411	-0.8411	-0.8411	-0.8411	-0.8411	-0.8411	-0.8411
YDR482C	CWC21	-0.2495	-0.2495	-0.2495	-0.2304	-0.2265	-0.2265	-0.2265	-0.2265	-0.2265	-0.2265	-0.2265	-0.2265	-0.2265	-0.2265	-0.2265	-0.2265	-0.2265	-0.2265	-0.2265	-0.8071	-0.8071	-0.8071	-0.8071	-0.8071	-0.8071	-0.8071	-0.8071	-0.8071	-0.8071	-0.8071	-0.8071	-0.8071	-0.8071	-0.8071
YMR083W	ADH3																																									-1.6605	-1.6605	-1.6605	-1.6605	-1.6605	-1.6605	-1.6605	-1.6605
YOR011W-A		-0.3217	-0.3217	-0.3217	-0.3217	-0.3217	-0.3217									-0.5187	-0.5187	-0.5187	-0.5187	-0.5187	-0.5187	-0.5187	-0.5187	-0.5187	-0.5187	-0.5187	-0.5187	-1.1773	-1.1773	-1.1773	-1.1773	-1.1773	-1.1773	-1.1773	-1.1773	-1.1773	-1.1773	-1.1773	-0.3342	-0.1656	-0.1656	-0.1656	-0.1656	-0.1656	-0.1656	-0.1656	-0.1656	-0.1656	-0.1656
YDR226W	ADK1	-0.8856	-0.8856	-0.8856	-0.8856	-0.8856	-0.8856	-0.8856								-0.7523	-0.7523	-0.7523	-0.7523	-0.7523	-0.7523	-0.7523	-0.7523	-0.7523	-0.7523	-0.7523	-0.7523	-0.7523	-0.7523	-0.7523	-1.7087	-1.7087	-1.7087	-1.7087	-1.7087	-1.7087	-1.7087	-1.7087	-1.7087	-1.7087	-1.7087	-1.7087	-1.7087	-1.7087	-1.7087	-1.2832	-1.2832	-1.2832	-1.2832
YHR139C	SPS100						-0.5407	-0.5407	-0.5407	-0.5407	-0.5407	-0.5407	-0.5407	-0.5407	-0.5407	-0.5407	-0.5407		-0.2423	-0.2423	-0.2423	-0.2423	-0.2423	-0.2423	-0.2423	-0.2423	-0.2423	-0.2423	-0.2423	-0.2423	-0.6948	-0.8887	-0.8887	-0.8887	-0.8887	-0.8887	-0.8887	-0.8887	-0.8887	-0.8887	-0.8887	-0.4917	-0.3783	-0.3783	-0.3783	-0.3783	-0.3783	-0.3783	-0.3783
YBR244W	GPX2	-0.129	-0.129	-0.129	-0.129									-1.129	-1.129	-1.129	-1.129	-1.129	-1.129	-1.129	-1.129	-1.129	-1.129	-1.129							-0.5992	-0.5992	-0.5992	-0.5992	-0.5992	-0.5992	-0.5992	-0.5992	-0.5992	-0.5992	-0.5992	-0.5992	-0.5992	-0.5992	-0.5992	-0.5992	-0.4119	-0.4119	-0.4119
YPR051W	MAK3	0.7679	0.512	-0.0853	-0.0853	-0.0853	-0.0853	-0.0853	-0.0853	-0.0853	-0.0853	-0.0853	-0.0853	-0.0853	-0.0853								-0.0461	-0.0461	-0.0461	-0.0461	-0.0461	-0.0461	-0.0461	-0.0461	-0.0461	-0.0461	-0.0461	-0.0461	-0.0461	-0.0461	-0.0461	-0.0461	-0.0461
YFR033C	QCR6																																												-1.3217	-1.3217	-1.3217	-1.3217	-1.3217
YKR039W	GAP1														-1.1152	-1.1152	-1.1152	-1.1152	-1.1152	-1.1152	-1.1152	-1.1152	-1.1152	-1.1152	-1.1152	-1.1152	-1.1152	-1.1152	-1.1152	-1.1152	-1.1152	-1.1152	-0.716	-0.716	-0.716	-0.716	-0.716	-0.716	-0.716	-0.716	-0.716	-0.716	-0.716	-0.716	-0.716	-0.716	-0.716	-0.716
YFR036W	CDC26	-0.8141	-0.8141	-0.8141	-0.8141	-0.8141	-0.8141																																-0.5441	-0.5441	-0.5441	-0.5441	-0.5441	-0.5441	-0.5441	-0.5441	-0.5441	-0.5441	-0.7799
YHR041C	SRB2	-1.0097	-1.0097	-1.0097	-1.0097	-0.9488	-0.9336	-0.9336	-0.9336	-0.9336	-0.9336	-0.9336	-0.9336	-0.9336	-0.9336	-0.9336	-0.9336	-0.9336	-0.9336	-0.9336	-0.9336	-0.9336	-0.9336					-0.6402	-0.6402	-0.6402	-0.6402	-0.6402	-0.6402	-0.6402	-0.6402	-0.6402	-0.6402	-0.6402	-0.6402	-0.6402	-0.6402	-0.6402	-0.6402						-0.578
YGR052W	FMP48
YLR333C	RPS25B										-1.8071	-1.8071	-1.8071	-1.8071	-1.8071	-1.8071	-1.8071	-1.8071	-1.8071	-1.8071	-1.8071	-1.8071
YHR143W	DSE2					-0.0461	-0.0461	-0.0461	-0.0461	-0.0461	-0.0461	-0.0461	-0.0461	-0.0461	-0.0461	-0.0461	-0.0461	-0.0461
YGR189C	CRH1	-1.501	-1.501	-1.501	-1.501																																			-1.3761	-1.3761	-1.3761	-1.3761	-1.3761	-1.3761	-1.3761	-1.3761	-1.3761	-1.3761
YDL049C	KNH1		-1.593	-1.593	-1.593	-1.593	-1.593	-1.593	-1.593	-1.593	-1.593	-1.593	-1.593	-1.593	-1.593	-1.593	-1.593	-1.593	-1.593												-1.1131	-1.1131	-1.1131	-1.1131	-1.1131	-1.1131	-1.1131	-1.1131	-1.1131	-1.1131	-1.1131	-1.1131	-1.1131	-1.1131	-1.1131	-1.1131	-1.1131
YBR066C	NRG2																											-0.4714	-0.4714	-0.4714	-0.4714	-0.4714	-0.4714	-0.4714	-0.4714	-0.4714	-0.4714	-0.4714	-0.4714	-0.4714	-0.4714	-0.4714	-0.4714	-0.4714				-0.6732	-0.6732
YPL014W																									-0.7888	-0.7888	-0.7888	-0.7888	-0.7888	-0.7888	-0.7888	-0.7888	-0.7888	-0.7888	-0.7888	-0.7888	-0.7888	-0.7888	-0.7888	-0.7888					-0.6812	-0.6812	-0.6812	-0.6812	-0.6812
YHR096C	HXT5	-2.2885	-2.2885	-2.2885	-2.2885	-2.2885	-2.2885	-2.2885	-2.2885																																		-0.7367	-0.7367	-0.7367	-0.7367	-0.7367	-0.7367	-0.7367
YPL249C-A	RPL36B	-0.3217	-0.3217	-0.3217	-0.3217	-0.3217	-0.3217	-0.3217	-0.3217	-0.7471	-0.9173	-0.9173	-0.9173	-0.9173	-0.9173	-0.9173	-0.9173	-0.9173	-0.9173	-0.9173	-0.9173
YLR325C	RPL38				-0.8339	-0.8339	-0.8339	-0.8339	-0.8339	-0.8339	-0.8339	-0.8339	-0.8339	-0.8339	-0.8339	-0.8339	-0.8339	-0.8339	-0.8339	-0.8339
YMR307W	GAS1	-0.632	-0.632	-0.632	-0.632	-0.632	-0.632	-0.632	-0.632
YMR174C	PAI3	-0.5947	-0.5947	-0.5947	-0.5947	-0.5947	-0.5947	-0.5947	-0.5947	-0.5947	-0.5947					-0.9998	-0.9998	-0.9998	-0.9998	-0.9998	-0.9998	-0.9998	-0.9998	-0.9998	-0.9998	-0.9998	-0.9998	-0.9998	-0.9998	-0.9998	-0.9998	-0.9998		0.0549	0.0549	0.0549	0.0549	0.0549	0.0549	0.0549	0.0549	0.0549	0.0549	0.0549	0.0549	0.0549
YHL033C	RPL8A						-0.1842	-0.1842	-0.1842	-0.1842	-0.1842	-0.1842	-0.1842	-0.1842	-0.1842	-0.5021	-0.714	-0.714	-0.714	-0.714	-0.714	-0.714	-0.714	-0.714	-0.714	-0.714
YMR107W	SPG4	-0.3217	-0.3217	-0.3217	-0.3217	-0.3217	-0.3217	-0.3217	-0.3217	-0.3217	-0.3217	-0.3217	-0.3217	-0.7104	-1.2286	-1.2286	-1.2286	-1.2286	-1.2286	-1.2286	-1.2286	-1.2286	-1.2286	-1.2286	-1.2286	-1.2286	-1.2286	-1.2286	-1.2286	-1.2286	-1.2286	-1.2286				-0.9998	-0.9998	-0.9998	-0.9998	-0.9998	-0.9998	-0.9998	-0.9998	-0.9998	-0.9998	-0.9998
YKR093W	PTR2
YKL061W							-0.3217	-0.3217	-0.3217	-0.3217	-0.3217	-0.3217	-0.3217	-0.3217	-0.3217	-0.3217	-0.3217	-0.3217	-0.3217											-0.8363	-0.8363	-0.8363	-0.8363	-0.8363	-0.8363	-0.8363	-0.8363	-0.8363	-0.8363	-0.8363				-0.0114	-0.0114	-0.0114	-0.0114	-0.0114	-0.0114
YCR061W		-0.8127	-0.8127	-0.8127	-0.8127	-0.8127	-0.8127	-0.8127	-0.8127		-0.7895	-0.7895	-0.7895	-0.7895	-0.7895	-0.7895	-0.7895	-0.7895	-0.7895	-0.8528	-1.106	-1.106	-1.106	-1.106	-1.106	-1.106	-1.106	-1.106	-1.106																				-0.6889
YGL032C	AGA2	-0.1373	-0.1373	-0.1373	-0.1373
YPL036W	PMA2	-0.7757	-0.7757	-0.7757	-0.7757	-0.7757						-0.5385	-0.5385	-0.5385	-0.5385	-0.5385	-0.5385	-0.5385	-0.5385	-0.5385	-0.5385	-0.5385																									-0.8071	-0.8071	-0.8071
YGL029W	CGR1	-0.5795	-0.5795	-0.5795	-0.5795	-0.5795	-0.5795	-0.5795	-0.5795	-0.5795	-0.5795	-0.5795	-0.5795	-0.5795	-0.5795	-0.5795							-1.2342	-1.2342	-1.2342	-1.2342	-1.2342	-1.2342	-1.2342	-1.2342	-1.2342	-1.2342	-1.2342	-1.2342	-1.2342	-1.2342	-1.2342	-1.2342	-1.2342
YGR035C		-1.3448	-1.3448
YIL016W	SNL1	0.3332				-0.2368	-0.2368	-0.2368	-0.2368	-0.2368	-0.2368	-0.2368	-0.2368	-0.2368	-0.2368	-0.2368	-0.2368	-0.2368	-0.2368	-0.2368	-0.2368	-0.2368					-0.5973	-0.5973	-0.5973	-0.5973	-0.5973	-0.5973	-0.5973	-0.5973	-0.5973	-0.5973	-0.5973								-0.7754	-0.7754	-0.7754	-0.7754	-0.7754
YGL062W	PYC1	-0.1373	-0.1373	-0.1373	-0.1373																														-1.3888	-1.3888	-1.3888	-1.3888	-1.3888	-1.3888	-1.3888	-1.3888	-1.3888	-1.3888
YJL190C	RPS22A
YDR460W	TFB3	0.1617	0.1617	0.1617	0.1617	0.1617	-0.3059	-0.4228	-0.4228	-0.4228	-0.4228	-0.4228	-0.4228	-0.4228	-0.4228	-0.4228	-0.4228	-0.4228	-0.4228	-0.4228	-0.4228	-0.4228	-0.4228	-0.4228	-0.4228				-0.4342	-0.4342	-0.4342	-0.4342	-0.4342	-0.4342	-0.4342	-0.4342	-0.4342	-0.4342	-0.4342	-0.4342	-0.4342
YLR229C	CDC42	-1.2759	-1.2759	-1.2759	-1.2759	-1.2759																									-0.9591	-0.9591	-0.9591	-0.9591	-0.9591	-0.9591	-0.9591	-0.9591	-0.9591	-0.9591									-0.2913
YPR101W	SNT309	0.0345	0.0345	0.0345	0.0345	0.0345	0.0345	0.0345			-0.129	-0.129	-0.129	-0.129	-0.129	-0.129	-0.129	-0.129	-0.129	-0.129	-0.129	-0.129	-0.129	-0.129	-0.129																						-0.0993	-0.0993	-0.0993
YDR382W	RPP2B		-0.3217	-0.3217	-0.3217	-0.3217	-0.3217	-0.3217	-0.3217	-0.3217	-0.3217	-0.3217	-0.3217	-0.3217				-0.6336	-0.6336	-0.6336	-0.6336	-0.6336	-0.6336	-0.6336	-0.6336	-0.6336	-0.6336	-0.6336	-0.6336	-0.6336
YGR234W	YHB1	-1.0504	-1.0504	-1.0504	-1.0504	-1.0504	-1.0504	-1.0504	-1.0504	-1.0504																				-1.3661	-1.3661	-1.3661	-1.3661	-1.3661	-1.3661	-1.3661	-1.3661	-1.3661	-1.3661	-1.3661	-1.3661	-1.3661	-1.3661	-1.3661	-1.3661	-1.3661
YEL017W	GTT3						-0.5143	-0.5143	-0.5143	-0.5143	-0.5143	-0.5143	-0.5143	-0.5143	-0.5143	-0.5143	-0.5143	-0.5143	-0.5143	-0.5143	-0.5143	-0.5143	-0.5143
YPL156C	PRM4	-1.4563	-1.4563	-1.4563	-1.4563	-1.4563																											-0.6587	-0.6587	-0.6587	-0.6587	-0.6587	-0.6587	-0.6587	-0.6587	-0.6587	-0.6587	-0.6587	-0.6587	-0.6587	-0.6587	-0.6587	-0.6587	-0.6587
YDL131W	LYS21						-0.7367	-0.7367	-0.7367	-0.7367	-0.7367	-0.7367	-0.7367	-0.7367	-0.7367	-0.7367	-0.7367	-0.7367	-0.7367	-0.7367	-0.7367	-0.7367	-0.7367												-0.8489	-0.8489	-0.8489	-0.8489	-0.8489	-0.8489	-0.8489	-0.8489	-0.8489	-0.8489	-0.8489	-0.8489	-0.8489		-0.5769
YDR281C	PHM6	-0.2877	-0.2877	-0.2877	-0.2877	-0.2877	-0.2877									-0.9067	-0.9067	-0.9067	-0.9067	-0.9067	-0.9067	-0.9067	-0.9067	-0.9067	-0.9067	-0.9067	-0.9067	-0.9067	-0.9067	-0.9067	-0.9067	-0.9067	-0.9067	-0.7251	-0.2711	-0.2711	-0.2711	-0.2711	-0.2711	-0.2711	-0.2711	-0.2711	-0.2711	-0.2711	-0.2711	-0.2711
YLR390W	ECM19	0.1878	0.1878	0.1878	0.1878	0.1878	0.1878	0.1878	0.1878	-0.0299	-0.0299	-0.0299	-0.0299	-0.0299	-0.0299	-0.0299	-0.0299	-0.0299	-0.0299	-0.0299				-0.4706	-0.4706	-0.4706	-0.4706	-0.4706	-0.4706	-0.4706	-0.4706	-0.4706	-0.4706	-0.4706	-0.4706	-0.4706	-0.4706	-0.4706	-0.4706	-0.4706
YDR231C	COX20	0.4809	0.4809	0.4809	0.4809	0.4809	0.4809	0.4809	0.4809	0.4809	-0.369	-0.369	-0.369	-0.369	-0.369	-0.369	-0.369	-0.369	-0.369	-0.369	-0.369	-0.369	-0.369	-0.369	-0.369	-0.369	-0.369	-0.369					-0.1697	-0.1697	-0.1697	-0.1697	-0.1697	-0.1697	-0.1697	-0.1697	-0.1697	-0.1697	-0.1697	-0.1697				-0.4529	-0.4529
YLR164W		0.5238	0.5238	0.5238	0.5238	0.5238	0.5238	0.5238	0.5238	0.5238	0.5238	0.5238	0.5238	0.6011	0.6011	0.6011	0.6011	0.6011	0.6011	0.6011	0.6011	0.6011	0.6011	0.6011	0.6011	0.6011	0.6011	0.6011	0.6011
YEL017C-A	PMP2
YAL040C	CLN3
YGL123W	RPS2	-0.3876	-0.3876	-0.3876	-0.3876	-0.3876	-0.3876	-0.3876	-0.3876	-0.3876	-0.3876	-0.3876	-0.3876	-0.3876
YGL030W	RPL30
YOR097C				-0.5627	-0.5627	-0.5627	-0.5627	-0.5627	-0.5627	-0.5627	-0.5627	-0.5627	-0.5627	-0.5627	-0.5627	-0.5627					-1.3434	-1.3434	-1.3434	-1.3434	-1.3434	-1.3434	-1.3434	-1.3434	-1.3434	-1.3434	-1.3434	-1.3434	-1.3434	-1.3434	-1.3434	-1.3434									-0.7125	-0.7125	-0.7125	-0.7125	-0.7125
YMR182C	RGM1														-1.1024	-1.1024	-1.1024	-1.1024	-1.1024	-1.1024	-1.1024	-1.1024	-1.1024	-1.1024	-1.1024	-1.1024	-1.1024
YLR438C-A	LSM3	0.4015	0.4015	0.4015	0.4015	0.4015	0.4015	0.4015	0.4015	0.4015	0.4015	0.4015	0.4015	0.4015	0.4015	0.4015	0.4015	0.4015			0.1637	0.1637	0.1637	0.1637	0.1637	0.1637	0.1637	0.1637	0.2521	0.3846	0.3846	0.3846	0.3846	0.3846	0.3846	0.3846	0.3846	0.3846	0.3846	0.3846								-0.4592	-0.4592
YMR040W	YET2	-0.6696	-0.6696	-0.6696	-0.6696	-0.6696	-0.6696	-0.6696	-0.6696																															-0.7997	-0.7997	-0.7997	-0.7997	-0.7997	-0.7997	-0.7997	-0.7997	-0.7997	-0.7997
YDR399W	HPT1							-0.5143	-0.5143	-0.5143	-0.5143	-0.5143	-0.5143	-0.5143	-0.5143	-0.5143	-0.5143
YKL186C	MTR2																					-0.7523	-0.7523	-0.7523	-0.7523	-0.7523	-0.7523	-0.7523	-0.7523	-0.7523	-0.7523	-0.7523	-0.7523	-0.7523	-0.7523	-0.7523	-0.7523
YPR009W	SUT2	-0.6336	-0.6336	-0.5846	-0.552	-0.552	-0.552	-0.552	-0.552	-0.552	-0.552	-0.552	-0.552	-0.552																																		-0.9591	-0.9591
YLR332W	MID2	-0.7623	-0.7623
YNR050C	LYS9	-0.0461	-0.0461	-0.0461	-0.0461	-0.0461	-0.0461	-0.0461										-1.106	-1.106	-1.106	-1.106	-1.106	-1.106	-1.106	-1.106	-1.106	-1.106	-1.106	-1.106	-1.106	-1.106	-1.106
YBL025W	RRN10		-0.5627	-0.5627	-0.5627	-0.5627	-0.5627	-0.5627	-0.5627	-0.5627	-0.5627	-0.5627	-0.5627									-0.7514	-0.7514	-0.7514	-0.7514	-0.7514	-0.7514	-0.7514	-0.7514	-0.7514	-0.7514	-0.7514	-0.7514	-0.7514	-0.7514	-0.7514	-0.7514	-0.7514	-0.7514	-0.7514
YOL114C		0.6479	0.6479	0.6479	0.6479	0.6479	0.6479	0.6479	0.6479	0.6479									-0.1247	-0.1247	-0.1247	-0.1247	-0.1247	-0.1247	-0.1247	-0.1247	-0.1247	-0.1247	-0.1247	-0.1247	-0.1247	-0.1247	-0.1587	-0.1842	-0.1842	-0.1842	-0.1842	-0.1842	-0.1842	-0.1842	-0.1842	-0.1842	-0.1842	-0.1842	-0.1842	-0.1842	-0.1842	-0.1842	-0.1842
YMR148W		0.0002	0.0002	0.0002	0.0002	0.0002	0.0002	0.0002	0.0002	0.0002							-0.3217	-0.3217	-0.3217	-0.3217	-0.3217	-0.3217	-0.3217	-0.3217	-0.3217	-0.3217	-0.3217	-0.3217	-0.3217	-0.3217	-0.3217	-0.3217										-0.1773	-0.1773	-0.1773	-0.1773	-0.1773	-0.1773	-0.1773	-0.1773
YOR369C	RPS12	-0.8677	-0.8677	-0.8677	-0.8677								-0.2672	-0.2672	-0.2672	-0.2672	-0.2672	-0.2672	-0.2672	-0.2672	-0.2672	-0.2672	-0.2672	-0.2672	-0.2672
YJR097W	JJJ3				0.0706	0.0706	0.0706	0.0706	0.0706	0.0706	0.0706	0.0706	0.0706	0.0706	0.0706	0.0706	0.0706	0.0706	0.0706	0.0706	0.0706	0.0706	-0.206	-0.2751	-0.2751	-0.2751	-0.2751	-0.2751	-0.2751	-0.2751	-0.2751	-0.2751	-0.2751
YLR178C	TFS1	-0.8265								-0.3217	-0.3217	-0.3217	-0.3217	-0.3217	-0.3217	-0.3217	-0.3217	-0.3217	-0.3217	-0.3342	-0.3342	-0.3342	-0.3342	-0.3342	-0.3342	-0.3342	-0.3342	-0.3342	-0.3342	-0.3342	-0.3342	-0.3342	-0.3342	-0.3342	-0.3342	-0.1825	-0.1825	-0.1825	-0.1825	-0.1825	-0.1825	-0.1825	-0.1825	-0.1825	-0.1825	-0.1825	-0.1825	-0.1825	-0.1825
YJR009C	TDH2																															-1.1842	-1.1842	-1.1842	-1.1842	-1.1842	-1.1842	-1.1842	-1.1842	-1.1842	-1.1842	-1.1842	-1.1842	-1.1842	-1.1842	-1.1842	-1.1842
YJR094W-A	RPL43B	-1.0504	-1.0504	-1.0504	-1.0504	-1.0504	-1.0504									-0.0085	-0.0085	-0.0085	-0.0085	-0.0085	-0.0085	-0.0085	-0.0085	-0.0085	-0.0085	-0.0085	-0.0085
YPL088W		-0.0587	-0.0587	-0.0587			-0.2286	-0.2286	-0.2286	-0.2286	-0.2286	-0.2286	-0.2286	-0.2286	-0.2286	-0.2286	-0.2286	-0.2286	-0.2875	-0.5233	-0.5233	-0.5233	-0.5233	-0.5233	-0.5233	-0.5233	-0.5233	-0.5233	-0.5233	-0.5233	-0.5233	-0.5233	-0.5233	-0.5233	-0.5233	-0.5233
YBR008C	FLR1																																		-0.4737	-0.4737	-0.4737	-0.4737	-0.4737	-0.4737	-0.4737	-0.4737	-0.4737	-0.4737	-0.4737	-0.4737	-2.7623	-2.7623	-2.7623
YCR021C	HSP30	-0.8017													-0.6612	-0.6612	-0.6612	-0.6612	-0.6612	-0.6612	-0.6612	-0.6612	-0.6612	-0.6612	-0.6612	-0.6612	-0.6612	-0.6612	-0.6612	-0.6612	-0.6612	-0.6612							-0.3921	-0.3921	-0.3921	-0.3921	-0.3921	-0.3921	-0.3921	-0.3921	-0.3921	-0.3921	-0.3921
YPL057C	SUR1	-0.8928	-0.8928	-0.8928
YLR061W	RPL22A	-0.7517	-0.7517	-0.7517	-0.7517	-0.7517	-0.7517	-0.7517	-0.7517	-0.7517	-0.7517	-0.7517
YJL043W		0.0933	0.0933													-0.843	-0.843	-0.843	-0.843	-0.843	-0.843	-0.843	-0.843	-0.843	-0.843	-0.843	-0.843	-0.843	-0.843	-0.843	-0.843	-0.843						-0.7867	-0.7867	-0.7867	-0.7867	-0.7867	-0.7867	-0.7867	-0.7867	-0.7867	-0.7867	-0.7867	-0.7867
YHR007C	ERG11																								-1.451	-1.451	-1.451	-1.451	-1.451	-1.451	-1.451	-1.451	-1.451	-1.451	-1.451	-1.451	-1.451	-1.451	-1.451	-1.451	-1.451
YKR053C	YSR3				-0.6921	-0.6921	-0.6921	-0.6921	-0.6921	-0.6921	-0.6921	-0.6921	-0.6921	-0.6921	-0.6921	-0.6655	-0.5992	-0.5992	-0.5992	-0.5992	-0.5992	-0.5992	-0.5992	-0.5992	-0.5992	-0.5992	-0.5992	-0.5992									-0.8071	-0.8071	-0.8071	-0.8071	-0.8071	-0.8071	-0.8071	-0.8071	-0.8071	-0.8071	-0.8071
YPL265W	DIP5																																													-0.7367	-0.7367	-0.7367	-0.7367
YER071C		-0.6436	-0.6436	-0.6436	-0.6436	-0.6436	-1.2423	-1.2423	-1.2423	-1.2423	-1.2423	-1.2423	-1.2423	-1.2423	-1.2423	-1.2423
YER053C-A		-1.3217	-1.3217																																							-0.3217	-0.3217	-0.3217	-0.3217	-0.3217	-0.3217	-0.3217	-0.3217
YGR243W	FMP43																															-0.6627	-0.6627	-0.6627	-0.6627	-0.6627	-0.6627	-0.6627	-0.6627	-0.6627	-0.6627	-0.2062	-0.2062	-0.2062	-0.2062	-0.2062	-0.2062	-0.2062	-0.2062
YDR357C		0.4045	0.4045	0.4045	0.4045	0.4045	0.4045	0.4045	0.4045	0.4045	0.4045	0.0319	0.0319	0.0319	0.0319	0.0319	0.0319	0.0319	0.0319	0.0319	0.0319	0.0319	0.0319	0.0319	0.0319	0.0319
YDR043C	NRG1
YER073W	ALD5		-1.2085	-1.2085	-1.2085	-1.2085	-1.2085	-1.2085	-1.2085	-1.2085	-1.2085	-1.2085	-1.2085	-1.2085	-1.2085	-1.3635	-1.3635	-1.3635	-1.3635	-1.3635	-1.3635	-1.3635	-1.3635	-1.3635	-1.3635	-1.3635	-1.3635	-1.3635	-0.6436	-0.6436	-0.6436	-0.6436	-0.6436	-0.6436	-0.6436	-0.6436	-0.6436	-0.6436	-0.6436	-0.6436							-0.9317	-0.9317	-0.9317
YLR056W	ERG3
YDR492W	IZH1	0.0178	0.0178	0.0178	0.0178	0.0178	0.0178	0.0178	0.0178	0.0178	0.0178	0.0178	0.0178	0.0178	0.0178	0.0178	0.0178	0.0178	0.0178
YGR037C	ACB1	-0.3742	-0.3742	-0.3742	-0.3742	-0.3742	-0.3742	-0.3742	-0.3742	-0.3742					-0.8964	-0.8964	-0.8964	-0.8964	-0.8964	-0.8964	-0.8964	-0.8964	-0.8964	-0.8964	-0.8964	-0.8964	-0.8964	-0.8964	-0.8964	-0.8964	-0.485	-0.2107	-0.2107	-0.2107	-0.2107	-0.2107	-0.2107	-0.2107	-0.2107	-0.2107	-0.2107	-0.2107	-0.2107	-0.2107	-0.7289	-0.7289	-0.7289	-0.7289	-0.7289
YBR218C	PYC2																																										-0.1642	-0.1642	-0.1642	-0.1642	-0.1642	-0.1642	-0.1642
YLR121C	YPS3	0.7328	0.7328	0.7328	0.7328	0.7328						-1.3363	-1.3363	-1.3363	-1.3363	-1.3363	-1.3363	-1.3363	-1.3363	-1.3363	-1.3363	-1.3363	-1.3363	-1.3363	-1.3363	-1.3363	-1.3363	-1.3363
YKL056C	TMA19	-0.5441	-0.5441	-0.5441	-0.5441	-0.5441				-0.6354	-0.6354	-0.6354	-0.6354	-0.6354	-0.6354	-0.6354	-0.6354	-0.6354	-0.6354	-0.6354	-0.6354	-0.6354	-0.6354	-0.6354	-0.6354	-0.6354	-0.6354
YHR156C	LIN1	0.2189	0.2189	0.2189	0.2189	0.2189	0.2189	0.2189	0.2189	0.2189									0.0002	0.0002	0.0002	0.0002	0.0002	0.0002	0.0002	0.0002	0.0002	0.0002	0.0002	0.0002	0.0002	0.0002	0.0002	0.0002	0.0002									0.2998	0.2998	0.2998	0.2998	0.2998	0.2998
YAR008W	SEN34	0.5869			0.1393	0.1393	0.1393	0.1393	0.1393	0.1393	0.1393	0.1393	0.1393	0.1393	0.1393	0.1393	0.1393	0.1393	0.1393	0.1393	0.1393	0.1393	0.1393	0.1393	0.1393	0.1393	0.1393	0.1393	0.1393	0.1393	0.1393	0.1393	0.1393	0.1393
YLR029C	RPL15A								-0.7874	-0.7874	-0.7874	-0.7874	-0.7874	-0.7874	-0.7874	-0.7874	-0.7874	-0.7874	-0.7874	-0.7874	-0.7874	-0.7874	-0.7874	-0.7874	-0.7874	-0.7874
YML008C	ERG6																					-0.9067	-0.9067	-0.9067	-0.9067	-0.9067	-0.9067	-0.9067	-0.9067	-0.9067	-0.9067	-0.9067	-0.9067	-0.9067	-0.9067														-0.9067
YPR026W	ATH1	-0.0856	-0.0856	-0.0856	-0.0856	-0.0856	-0.0856	-0.0856	-0.0856	-0.0856	-0.0856				0.4153	0.4153	0.4153	0.4153	0.4153	0.4153	0.4153	0.4153	0.4153	0.4153	0.4153	0.4153										-0.2786	-0.2786	-0.2786	-0.2786	-0.2786	-0.2786	-0.2786	-0.2786	-0.2786	-0.2786	-0.2786	-0.5253	-0.631	-0.631
YJL115W	ASF1	-0.9347	-0.9347	-0.9347	-0.9347	-0.9347	-0.9347	-0.9347	-0.9347	-0.9347	-0.9347	-0.9347	-0.9347	-0.9347					-1.7547	-1.7547	-1.7547	-1.7547	-1.7547	-1.7547	-1.7547	-1.7547	-1.7547	-1.7547	-1.7547	-1.7547	-1.7547	-1.7547	-1.7547	-1.7547															-0.7002
YCR086W	CSM1																-0.868	-0.868	-0.868	-0.868	-0.868	-0.868	-0.868	-0.868	-0.868	-0.868	-0.868	-0.868	-0.868	-0.868			-0.4637	-0.4637	-0.4637	-0.4637	-0.4637	-0.4637	-0.4637	-0.4637	-0.4637	-0.4637	-0.4637
YNL015W	PBI2	-0.1594	-0.1594	-0.1594	-0.1466	-0.1466	-0.1466	-0.1466	-0.1466	-0.1466	-0.1466	-0.1466	-0.1466	-0.1466	-0.1466	-0.1466					-0.9244	-0.9244	-0.9244	-0.9244	-0.9244	-0.9244	-0.9244	-0.9244	-0.9244	-0.9244	-0.9244	-0.9244	-0.9244				-0.5717	-0.5717	-0.5717	-0.5717	-0.5717	-0.5717	-0.5717	-0.5717	-0.5717	-0.5717		-0.3635	-0.3635
YNL044W	YIP3	0.2358	0.2358	0.2358	-0.5115	-0.5115	-0.5115	-0.5115	-0.5115	-0.5115	-0.5115	-0.5115	-0.5115	-0.5115	-0.5115	-0.5115	-0.5115	-0.5115	-0.5115	-0.4573	-0.4573	-0.4573	-0.4573	-0.4573	-0.4573	-0.4573	-0.4573	-0.4573	-0.4573	-0.4573	-0.4573	-0.4573	-0.4573		0.0127	0.0127	0.0127	0.0127	0.0127	0.0127	0.0127	0.0127	0.0127	0.0127	0.0127	0.0127		-0.9738	-0.9738
YGR147C	NAT2					-0.1152	-0.1152	-0.1152	-0.1152	-0.1152	-0.1152	-0.1152	-0.1152	-0.1152	-0.1152	-0.1152	-0.1152	-0.1152	-0.1152	-0.1152	-0.1152	-0.1152	-0.1152
YLR170C	APS1	0.5528	0.5528	-0.3552	-0.3552	-0.3552	-0.3552	-0.3552	-0.3552	-0.3552	-0.3552	-0.3552	-0.3552	-0.3552	-0.3552	-0.3552	-0.3552	-0.3552	-0.3552	-0.3552	-0.3629	-0.4313	-0.4313	-0.4313	-0.4313	-0.4313	-0.4313	-0.4313	-0.4313	-0.4313	-0.4313	-0.4313	-0.4313	-0.4313	-0.4313	-0.4313	-0.4313
YOL111C	MDY2																					-0.8165	-0.8165	-0.8165	-0.8165	-0.8165	-0.8165	-0.8165	-0.8165	-0.8165	-0.8165	-0.8165	-0.8165	-0.725	-0.725	-0.725	-0.725	-0.725	-0.725	-0.725	-0.725	-0.725	-0.725	-0.725	-0.725	-0.725	-0.725
YER078C		-0.0032	-0.0032	-0.0032	-0.5399	-0.5399	-0.5399	-0.5399	-0.5399	-0.5399	-0.5399	-0.5399	-0.5399	-0.5399	-0.5399	-0.5399	-0.5399	-0.5399	-0.5399	-0.5399	-0.5399									-0.4518	-0.4518	-0.4518	-0.4518	-0.4518	-0.4518	-0.4518	-0.4518	-0.4518	-0.4518	-0.4518	-0.4518	-0.4518	-0.4518	-0.4518	-0.4518	-0.4518	-0.4518
YGL210W	YPT32					-0.3957	-0.3957	-0.3957	-0.3957	-0.3957	-0.3957	-0.3957	-0.3957	-0.3957	-0.3957	-0.3957	-0.3957	-0.3957	-0.3957	-0.3957	-0.3957	-0.391	-0.391	-0.391	-0.391	-0.391	-0.391	-0.391	-0.391	-0.391	-0.391	-0.391	-0.391	-0.391	-0.391									-0.0664	-0.0664	-0.0664	-0.0664	-0.0664	-0.0664
YJL151C	SNA3	-0.129	-0.129	-0.129											-0.4685	-0.4685	-0.4685	-0.4685	-0.4685	-0.4685	-0.4685	-0.4685	-0.4685	-0.4685	-0.4685																				-0.5441	-0.5441	-0.5441	-0.5441	-0.5441
YGR174C	CBP4	0.286	0.286	0.286	0.286	0.286																																	-1.1697	-1.1697	-1.1697	-1.1697	-1.1697	-1.1697	-1.1697	-1.1697	-1.1697	-1.1697
YMR075W	RCO1	0.0085	0.0085	0.0085	0.1571	0.1571	0.1571	0.1571	0.1571	0.1571	0.1571	0.1571	0.1571	0.1571	0.1571	0.1571	-0.5478	-0.5478	-0.5478	-0.5478	-0.5478	-0.5478	-0.5478	-0.5478	-0.5478	-0.5478	-0.5478	-0.5478	-0.5478	-0.5478	-0.5478	-0.5478											0.0069	0.0069	0.0069	0.0069	0.0069	0.0069	0.0069
YJL011C	RPC17	-1.3573	-1.3573	-1.3573	-1.3573	-1.3573	-0.3217	-0.3217	-0.3217	-0.3217	-0.3217	-0.3217	-0.3217	-0.3217	-0.3217	-0.3217	-0.3217																															-0.477	-0.477
YBR158W	AMN1
YOR226C	ISU2	-0.4661	-0.4661	-0.4661	-0.4661	-0.4661	-0.4661	-0.4661	-0.4661	-0.4661	0.2605	0.3413	0.3413	0.3413	0.3413	0.3413	0.3413	0.3413	0.3413	0.3413	0.3413	0.3413	-1.8742	-1.8742	-1.8742	-1.8742	-1.8742	-1.8742	-1.8742	-1.8742	-1.8742	-1.8742	-1.8742	-0.9258	-0.9258	-0.9258	-0.9258	-0.9258	-0.9258	-0.9258	-0.9258	-0.9258	-0.9258	-0.9258	-0.9258	-0.9258	-0.9258	-0.9258	-0.9258
YKL029C	MAE1																																				0.0262	0.0262	0.0262	0.0262	0.0262	0.0262	0.0262	0.0262	0.0262	0.0262	0.0262	0.0262	0.0262
YPL187W	MF(ALPHA)1	-0.015	-0.015	-0.015	-0.015	-0.015	-0.015	-0.015	-0.015	-0.015	-0.015	-0.015	-0.015														-0.9998	-0.9998	-0.9998	-0.9998	-0.9998	-0.9998	-0.9998	-0.9998	-0.9998	-0.9998	-0.9998	-0.9998	-0.9998	-0.9998	-0.9998						-0.2047	-0.2047	-0.2047
YGR030C	POP6	-0.6778	-0.6778	-0.6778	-0.6778	-0.6778	-0.7498	-0.7642	-0.7642	-0.7642	-0.7642	-0.7642	-0.7642	-0.7642	-0.7642	-0.7642	-0.7642	-0.7642	-0.7642	-0.7642	-0.7642	-0.7642	-0.7642	-0.7642	-0.7642	-0.5539	-0.5539	-0.5539	-0.5539	-0.5539	-0.5539	-0.5539	-0.5539	-0.5539	-0.5539	-0.5539	-0.5539	-0.5539
YLR042C		-0.702			-0.5512	-0.5512	-0.5512	-0.5512	-0.5512	-0.5512	-0.5512	-0.5512	-0.5512	-0.5814	-0.7023	-0.7023	-0.7023	-0.7023	-0.7023	-0.7023	-0.7023	-0.7023	-0.7023	-0.7023	-0.7023	-0.7023	-0.7023					0.2088	0.2088	0.2088	0.2088	0.2088	0.2088	0.2088	0.2088	0.2088	0.2088	0.2088	0.2088	-0.2368	-0.2368	-0.2368	-0.2368	-0.2368	-0.2368
YDL048C	STP4	-0.0679	-0.0679	-0.0679	-0.0679	-0.0679	-0.0679	-0.0679	-0.0679	-0.0679	-0.0679	-0.0679	-0.0679	-0.0679	-0.0679	-0.0679	-0.0679	-0.0679	-0.0679																							-1.0085	-1.0085	-1.0085	-1.0085	-1.0085	-1.0085	-1.0085	-1.0085
YER029C	SMB1			0.1329	0.1329	0.1329	0.1329	0.1329	0.1329	0.1329	0.1329	0.1329	0.1329	0.1329	0.1329	0.1329	0.1329	0.1329	0.1329	0.1329	0.1329	-0.1201	-0.1201	-0.1201	-0.1201	-0.1201	-0.1201	-0.1201	-0.1201	-0.1201	-0.1201	-0.1201	-0.1201	-0.1201	-0.1201														-0.9384
YGL063W	PUS2				0.6011	0.6011	0.6011	0.6011	0.6011	0.6011	0.6011	0.6011	0.6011	0.6011	0.6011	0.6011	0.6011				-0.2062	-0.2062	-0.2062	-0.2062	-0.2062	-0.2062	-0.2062	-0.2062	-0.2062	-0.2062	-0.2062	-0.2062	-0.2062	-0.2062	-0.2062	-0.2062	-0.2062
YOR342C
YDR086C	SSS1	-0.5847	-0.5847	-0.5847	0.0797	0.0797	0.0797	0.0797	0.0797	0.0797	0.0797	0.0797	0.0797	0.0797	0.0797	0.0797	-0.2187	-0.8155	-0.8155	-0.8155	-0.8155	-0.8155	-0.8155	-0.8155	-0.8155	-0.8155	-0.8155	-0.8155	-0.8155	-0.8155	-0.8155	-0.8155	-0.8155	-0.8155
YOR148C	SPP2		-0.4212	-0.4212	-0.4212	-0.4212	-0.4212	-0.4212	-0.4212	-0.4212	-0.4212	-0.4212	-0.4212									-0.2408	-0.2408	-0.2408	-0.2408	-0.2408	-0.2408	-0.2408	-0.2408	-0.2408	-0.2408	-0.2408	-0.2408	-0.2408	-0.2408	-0.2408													0.216
YBR016W								-0.5738	-0.5738	-0.5738	-0.5738	-0.5738	-0.5738	-0.5738	-0.5738	-0.5738	-0.5738	-0.5738	-0.5738	-0.5738	-0.5738	-0.5738	-0.5738	-0.5738	-0.3732	-0.3732	-0.3732	-0.3732	-0.3732	-0.3732	-0.3732	-0.3732	-0.3732	-0.3732	-0.3732	-0.3732	-0.3732	-0.3732	-0.3732	-0.3732	-0.3732	-0.5544	-0.5544	-0.5544	-0.5544	-0.5544	-0.5544	-0.5544	-0.5544
YDL241W		0.0065	0.3063	0.3063	0.3063	0.3063	0.3063	0.3063	0.3063	0.3063	0.3063					-0.8307	-0.8307	-0.8307	-0.8307	-0.8307	-0.8307	-0.8307	-0.8307	-0.8307	-0.8307	-0.8307	-0.8307																	-0.6961	-0.6961	-0.6961	-0.6961	-0.6961	-0.6961
YGR121W-A		-0.6903	-0.6903	-0.6903	-0.6903	-0.6903	-0.6903	-0.6903	-0.6903	-0.6903	-0.6903	-0.7166	-0.7166	-0.7166	-0.7166	-0.7166	-0.7166	-0.7166	-0.7166	-0.7166	-0.7166	-0.7166	-0.8109	-1.1884	-1.1884	-1.1884	-1.1884	-1.1884	-1.1884	-1.1884	-1.1884	-1.1884	-1.1884	-1.1884	-1.1884	-1.1884													-0.5847
YKL216W	URA1	-0.5847	-0.5847	-0.5847	-0.5847	-0.5847	-0.391	-0.391	-0.391	-0.391	-0.391	-0.391	-0.391	-0.391	-0.391	-0.391	-0.391	-0.391	-0.391
YNR018W									-0.7176	-0.7176	-0.7176	-0.7176	-0.7176	-0.7176	-0.7176	-0.7176	-0.7176	-0.7176	-0.7176	-0.7176	-0.7176	-0.7176	-0.7176	-0.7176	-0.7176	-0.7176																							-0.9611
YEL007W
YIL123W	SIM1	-0.3578	-0.3578	-0.3578	-0.3578	-0.3578	-0.4213	-0.4372	-0.4372	-0.4372	-0.4372	-0.4372	-0.4372	-0.4372	-0.4372	-0.4372	-0.4372	-0.4372	-1.4852	-1.4852	-1.4852	-1.4852	-1.4852	-1.4852	-1.4852	-1.4852	-1.4852	-1.4852	-1.4852	-1.4852	-1.4852	-1.4852	-1.4852
YJR148W	BAT2	-0.5847	-0.5847	-0.5847	-0.5847	-0.5847	-0.5847											-0.9998	-0.9998	-0.9998	-0.9998	-0.9998	-0.9998	-0.9998	-0.9998	-0.9998	-0.9998	-0.9998	-0.9998	-0.9998
YKL198C	PTK1	-0.8323	-0.8323	-0.8323	-0.8323	-0.8323	-0.8323	-0.8323	-0.8323	-0.8323	-0.8323	-0.8323														-1.2477	-1.2477	-1.2477	-1.2477	-1.2477	-1.2477	-1.2477	-1.2477	-1.2477	-1.2477	-1.2477
YFL021W	GAT1	-2.236	-2.236	-2.236	-2.236	-2.236	-2.236	-2.236																-1.1842	-1.1842	-1.1842	-1.1842	-1.1842	-1.1842	-1.1842	-1.1842	-1.1842	-1.1842	-1.1842	-1.1842	-1.1842	-1.1842	-1.1842	-1.1842	-1.1842	-1.1842	-0.97	-0.9164	-0.9164	-0.9164	-0.9164	-0.9164	-0.9164	-0.9164
YBR296C	PHO89										-0.9681	-0.9681	-0.9681	-0.9681	-0.9681	-0.9681	-0.9681	-0.9681	-0.9681	-0.9681	-0.9681	-0.9681	-0.9681	-0.9681	-0.9681	-0.9681	-0.9681	-0.9681			-0.1797	-0.1797	-0.1797	-0.1797	-0.1797	-0.1797	-0.1797	-0.1797	-0.1797	-0.1797	-0.1797	-0.1797	-0.1797	-0.1797
YBR068C	BAP2
YLL024C	SSA2	-0.3468	-0.3468	-0.3468	-0.3468	-0.3468	-0.3468	-0.3468	-0.3468	-0.3468											-0.5485	-0.5485	-0.5485	-0.5485	-0.5485	-0.5485	-0.5485	-0.5485	-0.5485	-0.5485	-0.5485	-0.5485
YOR222W	ODC2			0.3982	0.3982	0.3982	0.3982	0.3982	0.3982	0.3982	0.3982	0.3982	0.3982	0.3982	0.3982	0.3982	0.3982	0.1713	0.1713	0.1713	0.1713	0.1713	0.1713	0.1713	0.1713	0.1713	0.1713	0.1713	0.1713	0.1713	0.1713	0.1258	0.1258	0.1258	0.1258	0.1258	0.1258	0.1258	0.1258	0.1258	0.1258	0.1258	0.1258
YPL183W-A	RTC6													-0.1962	-0.1962	-0.1962	-0.1962	-0.1962	-0.1962	-0.1962	-0.1962	-0.1962	-0.1962	-0.1962	-0.1962	-0.3801	-0.6561	-0.6561	-0.6561	-0.6561	-0.6561	-0.6561	-0.6561	-0.6561	-0.6561	-0.6561	-0.6561	-0.6561	-0.6561	-0.6561									-0.7763
YCR046C	IMG1	-0.0449	-0.0449	-0.0449	-0.0449	-0.0449	-0.0449	-0.0449	-0.0449	-0.0449	-0.0449	-0.0449	-0.0449	-0.0449	-0.0449	0.2713	0.5084	0.5084	0.5084	0.5084	0.5084	0.5084	0.5084	0.5084	0.5084	0.5084																						-0.2342	-0.2342
YOL052C	SPE2										-1.6436	-1.6436	-1.6436	-1.6436	-1.6436	-1.6436	-1.6436	-1.6436	-1.6436	-1.6436	-1.6436	-1.6436	-1.6436	-1.6436	-1.6436	-1.6436	-1.6436																	-0.8192	-0.8192	-0.8192	-0.8192	-0.8192	-0.8192
YOR375C	GDH1	-0.6226	-0.6226						-0.6289	-0.6289	-0.6289	-0.6289	-0.6289	-0.6289	-0.6289	-0.6289	-0.6289	-0.6289	-0.6289	-0.6289
YMR303C	ADH2	-0.2786	-0.2786	-0.2786	-0.2786	-0.2786	-0.2786	-0.2786	-0.2786	-0.2786	-0.2786	-0.2786	-0.2786	-0.2786	-0.2786																										-0.5627	-0.5627	-0.5627	-0.5627	-0.5627	-0.5627	-0.5627	-0.5627	-0.5627
YNR004W		0.0002	0.0002	0.0002	0.0002	0.0246	0.2439	0.2439	0.2439	0.2439	0.2439	0.2439	0.2439	0.2439	0.2439	0.2439	0.2439	0.2439	0.2439	0.2439	0.2439	0.2439		-0.2043	-0.2043	-0.2043	-0.2043	-0.2043	-0.2043	-0.2043	-0.2043	-0.2043	-0.2043	-0.2043	-0.2043
YIL064W	SEE1	-0.553	-0.553	-0.553	-0.2265	-0.2265	-0.2265	-0.2265	-0.2265	-0.2265	-0.2265	-0.2265	-0.2265	-0.2265	-0.2265	-0.2265	-0.2265	-0.2265	-0.2265	-0.2265	-0.2265	-0.2265			-0.442	-0.442	-0.442	-0.442	-0.442	-0.442	-0.442	-0.442	-0.442	-0.442	-0.2781	-0.0322	-0.0322	-0.0322	-0.0322	-0.0322	-0.0322	-0.0322	-0.0322	-0.0322
YPL135W	ISU1	-0.7238	-0.7238	-0.7238	-0.7238	-0.7238	-0.7238	-0.7238	-0.7238	-0.7238	-0.7238	-0.7238	-0.7238	-0.7238	-0.7238	-0.369	-0.369	-0.369	-0.369	-0.369	-0.369	-0.369	-0.369	-0.369	-0.369	-0.369	-0.369
YER019W	ISC1	-0.793	-0.793	-0.793	-0.793	-0.793	-0.793	-0.793	-0.793	-0.793	-0.793	-0.793	-0.793			-1.2966	-1.2966	-1.2966	-1.2966	-1.2966	-1.2966	-1.2966	-1.2966	-1.2966	-1.2966	-1.2966	-1.2966	-1.2966	-1.2966	-1.2966	-1.2966															-0.6801	-0.6801	-0.6801	-0.6801
YOL039W	RPP2A	-0.8363	-0.8363	-0.8363
YDR353W	TRR1	-0.4071	-0.4071	-0.4071	-0.4071	-0.6265	-0.6265	-0.6265	-0.6265	-0.6265	-0.6265	-0.6265	-0.6265	-0.6265	-0.6265	-0.6265	-0.6265	-0.6265	-0.6265	-0.6265	-0.6265	-0.6265	-0.6265			-0.6436	-0.6436	-0.6436	-0.6436	-0.6436	-0.6436	-0.6436	-0.6436	-0.6436	-0.6436										-0.6358	-0.6358	-0.6358	-0.6358	-0.6358
YJR017C	ESS1						-0.2222	-0.2222	-0.2222	-0.2222	-0.2222	-0.2222	-0.2222	-0.2222	-0.2222	-0.2222	-0.2222	-0.2222	-0.2222	-0.8844	-0.8844	-0.8844	-0.8844	-0.8844	-0.8844	-0.8844	-0.8844	-0.8844	-0.8844	-0.8844	-0.8844	-0.8844	-0.8844	-0.8844	-0.8844	-0.8844	-0.8844
YPR145C-A		-0.2423	-0.2423	-0.2423	-0.2423	-0.2423	-0.2423	-0.3915	-0.4128	-0.4128	-0.4128	-0.4128	-0.4128	-0.4128	-0.4128	-0.4128	-0.4128	-0.4334	-0.4641	-0.4641	-0.4641	-0.4641	-0.4641	-0.4641	-0.4641	-0.4641	-0.4641	-0.4641	-0.4641	-0.4641	-0.4641	-0.4641	-0.4641	-0.4641	-0.5252	-0.5252	-0.5252	-0.5252	-0.5252	-0.5252	-0.5252	-0.5252	-0.5252	-0.5252
YHL031C	GOS1	0.5014	0.5014	0.5014	0.5014	0.5014	0.5014	0.5014	0.5014	0.5014	0.5014									0.3873	0.3873	0.3873	0.3873	0.3873	0.3873	0.3873	0.3873	0.3873	0.3873	0.4075	0.4278	0.4278	0.4278	0.4278	0.4278	0.4278	0.4278	0.4278	0.4278	0.4278	0.4278	0.4278	0.4278
YLR099C	ICT1	-0.9924	-0.9924	-0.9924	-0.9924	-0.9924	-0.9924	-0.9924	-0.9924	-0.9924	-0.9924	-0.9924	-0.9924								-0.8648	-0.8648	-0.8648	-0.8648	-0.8648	-0.8648	-0.8648	-0.8648	-0.8648	-0.8648	-0.8648	-0.8648	-0.8648	-0.8648	-0.8648	-0.8648	-0.8648	-0.9591	-1.1477	-1.1477	-1.1477	-1.1477	-1.1477	-1.1477	-1.1477	-1.1477	-1.1477	-0.4342	-0.4342
YGR095C	RRP46	0.391	0.391	0.391	0.391	0.391	0.391	0.391	0.391	0.391	0.391	0.391	0.391	0.391	0.391	0.391	0.391	0.391							-0.0295	-0.0295	-0.0295	-0.0295	-0.0295	-0.0295	-0.0295	-0.0295	-0.0295	-0.0295	-0.0295	-0.0295	-0.0295	-0.0295	-0.0295
YGL194C-A		-0.6112	-0.6112	-0.6112	-0.6112	-0.6112	-0.6112									0.1547	0.1547	0.1547	0.1547	0.1547	0.1547	0.1547	0.1547	0.1547	0.1547	0.1547	0.1547	0.1547	0.1547	0.1547	0.1547	0.1547	0.1547
YOR383C	FIT3	-0.8071	-0.8071	-0.8071	-0.8071				-0.1842	-0.1842	-0.1842	-0.1842	-0.1842	-0.1842	-0.1842	-0.1842	-0.1842	-0.1842	-0.714	-0.714	-0.714	-0.714	-0.714	-0.714	-0.714	-0.714	-0.714	-0.714	-0.714	-0.714	-0.714	-0.714	-0.3447	0.1478	0.1478	0.1478	0.1478	0.1478	0.1478	0.1478	0.1478	0.1478	0.1478			-0.1353	-0.1353	-0.1353	-0.1353
YPR182W	SMX3	-0.0943	-0.0943	-0.0943	-0.0943	-0.0943	-0.0943	-0.0943	-0.0943	-0.0943	-0.0943	-0.0943	-0.0943	-0.0943	-0.0943													-1.1518	-1.1518	-1.1518	-1.1518	-1.1518	-1.1518	-1.1518	-1.1518	-1.1518	-1.1518	-1.1518	-1.1518	-1.1518	-1.1518	-1.1518	-1.1518	-1.1518	-1.1518	-0.9309	-0.71	-0.71	-0.71
YIL134W	FLX1	-0.9497	-0.9497	-0.9497	-0.9497	-0.9497	-0.9497	-0.9497	-0.9497	-0.9497	-0.9497	-0.9497	-0.9497	-0.9497	-0.9497	-0.9497	-0.9497	-0.9497	-0.9497				-0.5847	-0.5847	-0.5847	-0.5847	-0.5847	-0.5847	-0.5847	-0.5847	-0.5847	-0.5847	-0.5847	-0.5847
YDR055W	PST1																							-0.55	-0.55	-0.55	-0.55	-0.55	-0.55	-0.55	-0.55	-0.55	-0.55	-0.55	-0.55													-0.5562	-0.5562
YPR145W	ASN1	-0.747	-0.747	-0.747	-0.747	-0.747	-0.747	-0.747	-0.747	-0.747	-0.747	-0.747	-0.747	-0.747	-0.747	-0.747
YGR131W		-0.1012	-0.1012	-0.1012	-0.1012	-0.1012	-0.1012	-0.1012	-0.1012	-0.1012	-0.1012	-0.1012	-0.1012	-0.1012	-0.1012	-0.1012	-0.1012	-0.1012	-0.1012	0.1511	0.1511	0.1511	0.1511	0.1511	0.1511	0.1511	0.1511	0.1511	0.1511	0.1511	-0.0397	-0.2305	-0.2305	-0.2305	-0.2305	-0.2305	-0.2305	-0.2305	-0.2305	-0.2305	-0.2305	-0.2305							-0.0958
YPL015C	HST2			-0.7888	-0.7888	-0.7888	-0.7888	-0.7888	-0.7888	-0.7888	-0.7888	-0.7888	-0.7888	-0.7888	-0.7888	-0.7888	-0.7888	-0.7888	-0.7888	-0.7888																									-0.8911	-0.8911	-0.8911	-0.8911	-0.8911
YJL078C	PRY3																					-1.0322	-1.0322	-1.0322	-1.0322	-1.0322	-1.0322	-1.0322	-1.0322	-1.0322	-1.0322	-1.0322	-1.0322	-1.0322	-1.0322	-1.0322	-1.0322	-1.0322	-1.0322	-0.8793	-0.8411	-0.8411	-0.8411	-0.8411	-0.8411	-0.8411	-0.8411	-0.8411	-0.8411
YGR161C	RTS3	-1.129	-1.129	-1.129	-1.129	-1.129	-1.129	-1.129	-1.129	-1.129																							-1.2869	-1.2869	-1.2869	-1.2869	-1.2869	-1.2869	-1.2869	-1.2869	-1.2869	-1.2869	-1.2869	-1.2869	-1.2869	-1.2869	-1.2869	-1.2869	-1.2869
YLR417W	VPS36												-0.7642	-0.7642	-0.7642	-0.7642	-0.7642	-0.7642	-0.7642	-0.7642	-0.7642	-0.7642	-0.7642	-0.6837	-0.3618	-0.3618	-0.3618	-0.3618	-0.3618	-0.3618	-0.3618	-0.3618	-0.3618	-0.3618	-0.3618	-0.3618	-0.3618	-0.1642	-0.1642	-0.1642	-0.1642	-0.1642	-0.1642	-0.1642	-0.1642	-0.1642	-0.1642	-0.1642	-0.1642
YOR185C	GSP2	-0.3668	-0.3668	-0.3668	-0.3668	-0.3668	-0.3668	-0.3668	-0.3668	-0.3668					-0.8242	-0.8242	-0.8242	-0.8242	-0.8242	-0.8242	-0.8242	-0.8242	-0.8242	-0.8242	-0.8242	-0.8242	-0.8242	-0.8242	-0.8242	-0.8242	-0.8242	-0.8242														-0.4685	-0.4685	-0.4685	-0.4685
YLR348C	DIC1				-0.797	-0.797	-0.797	-0.797	-0.797	-0.797	-0.797	-0.797	-0.797	-0.797	-0.797	-0.5947	-0.5947	-0.5947	-0.5947	-0.5947	-0.5947	-0.5947	-0.5947	-0.5947	-0.5947	-0.5947	-0.5947	-0.5947	-0.5947	-0.7111	-0.8276	-0.8276	-0.8276	-0.8276	-0.8276	-0.8276	-0.8276	-0.8276	-0.8276	-0.8276	-0.8276				-0.4916	-0.4916	-0.4916	-0.4916	-0.4916
YLR354C	TAL1											-0.3217	-0.3217	-0.3217	-0.3217	-0.3217	-0.3217	-0.3217	-0.3217	-0.3217	-0.3217	-0.3217	-0.3217	-0.3217	-0.3217	-0.3217	-1.1599	-1.1599	-1.1599	-1.1599	-1.1599	-1.1599	-1.1599	-1.1599	-1.1599	-1.1599	-1.1599	-1.1599
YLR168C		-0.6535	-0.6535	-0.6535	-0.6535	-0.6535	-0.6535	-0.6535	-0.6535	-0.6535		-0.4074	-0.4074	-0.4074	-0.4074	-0.4074	-0.4074	-0.4074	-0.4074	-0.4074	-0.4074	-0.4074	-0.4074	-0.4074	-0.4074
YBR069C	TAT1																																														-1.8692	-1.8692	-1.8692
YDR476C		-0.7305	-0.7305	-0.7305				-0.5707	-0.5707	-0.5707	-0.5707	-0.5707	-0.5707	-0.5707	-0.5707	-0.5707	-0.5707	-0.5707	-0.5707	-0.5707	-0.5707	-0.5707	-0.5707	-0.5707	-0.5707	-0.7885	-0.8818	-0.8818	-0.8818	-0.8818	-0.8818	-0.8818	-0.8818	-0.8818	-0.8818	-0.8818	-0.8818	-0.8818	-0.8818	-0.8818	-0.8818	-0.8818
YOL101C	IZH4	-0.5885	-0.5885	-0.5885	-0.5885											-0.9274	-0.9274	-0.9274	-0.9274	-0.9274	-0.9274	-0.9274	-0.9274	-0.9274	-0.9274	-0.9274	-0.9274	-0.9274	-0.9274	-0.522	-0.522	-0.522	-0.522	-0.522	-0.522	-0.522	-0.522	-0.522	-0.522	-0.522	-0.522	-0.522	-0.522	-0.522	-0.522
YER065C	ICL1	-1.5358	-1.5358	-1.5358	-1.5358	-1.5358	-1.5358	-1.5358	-1.5358	-1.5358											-1.1758	-1.1758	-1.1758	-1.1758	-1.1758	-1.1758	-1.1758	-1.1758	-1.1758	-1.1758	-1.1758	-1.1758																-0.7874	-0.7874
YDR092W	UBC13								-0.8307	-0.8307	-0.8307	-0.8307	-0.8307	-0.8307	-0.8307	-0.8307	-0.8307	-0.8307	-0.8307	-0.8307	-0.8307	-0.8307	-0.8307	-0.8307	-0.8307	-0.8307																						-0.7856	-0.7856
YBL101C	ECM21	-0.4953	-0.4953	-0.4953	-0.4953																												-0.9998	-0.9998	-0.9998	-0.9998	-0.9998	-0.9998	-0.9998	-0.9998	-0.9998	-0.9998	-0.9998	-0.9998	-0.9998	-0.9998	-0.9998	-0.9998	-0.9998
YLR091W		-0.0943	-0.0943	-0.0943	-0.0943	-0.0943	-0.0943	-0.0943	-0.0943			-0.1723	-0.1723	-0.1723	-0.1723	-0.1723	-0.1723	-0.1723	-0.1723	-0.1723	-0.1723	-0.1723	-0.1723	-0.1723	-0.1723	-0.2385	-0.3046	-0.3046	-0.3046	-0.3046	-0.3046	-0.3046	-0.3046	-0.3046	-0.3046	-0.3046	-0.3046	-0.3046	-0.3046	-0.3046	-0.3046					-0.6573	-0.6573	-0.6573	-0.6573
YGR268C	HUA1	-0.0587	-0.0587	-0.0587	-0.0587	-0.0587	-0.0587	-0.028	-0.028	-0.028	-0.028	-0.028	-0.028	-0.028	-0.028	-0.028	-0.051	-0.1201	-0.1201	-0.1201	-0.1201	-0.1201	-0.1201	-0.1201	-0.1201	-0.1201	-0.1201	-0.1201	-0.1201	-0.1201	-0.1201	-0.1201												-0.0993	-0.0993	-0.0993	-0.0993	-0.0993	-0.0993
YMR002W	MIC17															-0.9067	-0.9067	-0.9067	-0.9067	-0.9067	-0.9067	-0.9067	-0.9067	-0.9067	-0.9067	-0.9067		-0.8242	-0.8242	-0.8242	-0.8242	-0.8242	-0.8242	-0.8242	-0.8242	-0.8242	-0.8242	-0.8242	-0.8242
YJR129C									-0.3217	-0.3217	-0.3217	-0.3217	-0.3217	-0.3217	-0.3217	-0.3217	-0.3217	-0.3217	-0.3217	-0.3217	-0.3217	-0.3217	-0.3217	-0.3217	-0.4646	-0.5599	-0.5599	-0.5599	-0.5599	-0.5599	-0.5599	-0.5599	-0.5599	-0.5599	-0.5599	-0.5599	-0.5599	-0.5599	-0.5599	-0.5599	-0.5599
YJR058C	APS2	0.1445	0.1445	0.1445	0.1445	0.1445	0.1445	0.1445	0.1445	0.1445	0.1445	0.1445							-0.2633	-0.2633	-0.2633	-0.2633	-0.2633	-0.2633	-0.2633	-0.2633	-0.2633	-0.2633	-0.2633	-0.2633	-0.2633	0.0568	0.0568	0.0568	0.0568	0.0568	0.0568	0.0568	0.0568	0.0568	0.0568	0.0568	0.0568	0.0568	0.0568	0.0568	0.0568
YOL121C	RPS19A
YPR138C	MEP3	-0.7811	-0.7811	-0.7811	-0.7811	-0.7811	-0.7811	-0.7811																																				-1.2852	-1.2852	-1.2852	-1.2852	-1.2852	-1.2852
YGR034W	RPL26B
YMR251W	GTO3	-0.4737	-0.4737	-0.7107	-0.7107	-0.7107	-0.7107	-0.7107	-0.7107	-0.7107	-0.7107	-0.7107	-0.7107	-0.8284	-0.8873	-0.8873	-0.8873	-0.8873	-0.8873	-0.8873	-0.8873	-0.8873	-0.8873	-0.8873	-0.8873	-0.8873	-0.8873	-0.8873	-0.8873	-0.8873	-0.5411	-0.4978	-0.4978	-0.4978	-0.4978	-0.4978	-0.4978	-0.4978	-0.4978	-0.4978	-0.4978	-0.4978	-0.4978	-0.4978	-0.4978	-0.4978	-0.4978	-0.4978
YJL144W		0.0109	0.0109	0.0109	0.0109	0.0109	0.0109	0.0109	0.0109	0.0109	0.2355	0.4153	0.4153	0.4153	0.4153	0.4153	0.4153	0.4153	0.4153	0.4153	0.4153	0.4153	0.4153	0.4153	0.4153									0.3413	0.3413	0.3413	0.3413	0.3413	0.3413	0.3413	0.3413	0.3413	0.3413	0.3413	-0.1067	-0.1067	-0.1067	-0.1067	-0.1067
YPL054W	LEE1														-0.7534	-0.7534	-0.7534	-0.7534	-0.7534	-0.7534	-0.7534	-0.7534	-0.7534	-0.7534	-0.7534	-0.7534	-0.7534	-0.7534	-0.7534				-0.3217	-0.3217	-0.3217	-0.3217	-0.3217	-0.3217	-0.3217	-0.3217	-0.3217	-0.3217	-0.3217	-0.3217	-0.3217	-0.3217	-0.3217	-0.3217	-0.3217
YKL096W	CWP1	-0.7912	-0.7912	-0.7912	-0.7912	-0.7912	-0.7912																										-0.9738	-0.9738	-0.9738	-0.9738	-0.9738	-0.9738	-0.9738	-0.9738	-0.9738	-0.9738	-0.9738
YLR104W		0.0503																						-0.3406	-0.3406	-0.3406	-0.3406	-0.3406	-0.3406	-0.3406	-0.3406	-0.3406	-0.3406	0.4077	0.4077	0.4077	0.4077	0.4077	0.4077	0.4077	0.4077	0.4077	0.4077	0.4077	0.4077				0.1417
YMR269W	TMA23	0.4002	0.4002	0.4002	0.4002	0.4002	0.4002	0.4002	0.4002	0.4002	0.4002	0.4002	0.4002	0.4002	0.4002	0.4002	0.4002					0.3102	0.3102	0.3102	0.3102	0.3102	0.3102	0.3102	0.3102	0.3102	0.3102	0.3102	0.3102	0.3102	0.3102	0.3102	0.3102		0.5178	0.5178	0.5178	0.5178	0.5178	0.5178	0.5178	0.5178	0.5178	0.4415	0.2633
YHL015W	RPS20	-0.8208	-0.8208	-0.8208	-0.8208	-1.3378	-1.5963	-1.5963	-1.5963	-1.5963	-1.5963	-1.5963	-1.5963	-1.5963	-1.5963	-1.5963	-1.5963	-1.5963	-1.5963
YML129C	COX14	-0.8043	-0.8043	-0.8043	-0.8043	-0.8043	-0.8043	-0.8043	-0.8043	-0.8043	-0.8043	-0.8043	-0.8043	-0.8043			-0.1656	-0.1656	-0.1656	-0.1656	-0.1656	-0.1656	-0.1656	-0.1656	-0.1656	-0.1656	-0.1656																					-0.8623	-0.8623
YBR231C	SWC5	0.1511	0.1511	0.1511	0.2214	0.2214	0.2214	0.2214	0.2214	0.2214	0.2214	0.2214	0.2214	0.2214	0.2214	0.2214	0.2214								-0.6436	-0.6436	-0.6436	-0.6436	-0.6436	-0.6436	-0.6436	-0.6436	-0.6436	-0.6436	-0.6436	-0.6436
YKR095W-A	PCC1	-0.3217	-0.3217	-0.3217						-0.6436	-0.6436	-0.6436	-0.6436	-0.6436	-0.6436	-0.6436	-0.6436	-0.6436	-0.6436	-0.6436	-0.6436					-0.8071	-0.8071	-0.8071	-0.8071	-0.8071	-0.8071	-0.8071	-0.8071	-0.8071	-0.8071		0.7778	0.7778	0.7778	0.7778	0.7778	0.7778	0.7778	0.7778	0.7778	0.7778	0.7778	0.7778	-0.3422
YDR381C-A		-1.0114	-1.4372	-1.4372	-1.4372	-1.4372	-1.4372	-1.4372	-1.4372	-1.4372	-1.4372	-1.4372	-1.4372	-1.4372	-1.4372																														-0.6336	-0.6336	-0.6336	-0.6336	-0.6336
YJL116C	NCA3	-1.578	-1.578	-1.578																													-0.9067	-0.9067	-0.9067	-0.9067	-0.9067	-0.9067	-0.9067	-0.9067	-0.9067	-0.9067	-0.9067
YJL052W	TDH1	-0.8385	-0.8385	-0.8385	-0.8385	-0.8385	-0.8385	-0.8385	-0.8385																			-0.8928	-0.8928	-0.8928	-0.8928	-0.8928	-0.8928	-0.8928	-0.8928	-0.8928	-0.8928	-0.8928	-0.8928	-0.8928	-0.8928	-0.8928	-0.8928	-0.8928
YNL024C		-0.2961	-0.3217	-0.3217	-0.3217	-0.3217	-0.3217	-0.3217	-0.3217	-0.3217	-0.3217																										-0.4592	-0.4592	-0.4592	-0.4592	-0.4592	-0.4592	-0.4592	-0.4592	-0.4592	-0.4592	-0.4592	-0.4592	-0.4592
YOR179C	SYC1	0.2208	0.2208	0.2208	0.2208	0.2208	0.2208				-0.5184	-0.5184	-0.5184	-0.5184	-0.5184	-0.5184	-0.5184	-0.5184	-0.5184	-0.5184	-0.5184	-0.5184	-0.5184	-0.5184	-0.5184	-0.5184	-0.5184	-0.5184	-0.5184
YFL017W-A	SMX2	0.3846	0.3846	0.3846	0.3846	0.3846	0.3846																							-0.967	-0.967	-0.967	-0.967	-0.967	-0.967	-0.967	-0.967	-0.967	-0.967	-0.967	-0.967	-0.967	-0.967
YDR471W	RPL27B	-0.2852	-0.2852	-0.2852	-0.2852	-0.2852	-0.2852	-0.2852	-0.2852	-0.2852	-0.2852	-0.2852	-0.2852
YCR031C	RPS14A	-0.5918	-0.5918	-0.5918	-0.5918	-0.5918	-0.5918	-0.5918	-0.5918	-0.5918	-0.5918	-0.5918
YOR276W	CAF20	1.4509	1.4509	1.4509	1.4509	1.4509	1.4509	0.5363	0.5363	0.5363	0.5363	0.5363	0.5363	0.5363	0.5363	0.5363	0.5363	0.5363	0.2316	0.2316	0.2316	0.2316	0.2316	0.2316	0.2316	0.2316	0.2316	0.2316	0.2316	0.2316	0.2316	0.2316	0.2316	0.2316
YER055C	HIS1						-0.9941	-0.9941	-0.9941	-0.9941	-0.9941	-0.9941	-0.9941	-0.9941	-0.9941	-0.9941	-0.9941
YKL065C	YET1	-0.5847	-0.5847	-0.5847	-0.5847	-0.5847	-0.5847	-0.5847	-0.5847	-0.5847	-0.5847	-0.5847	-0.5847							-0.7367	-0.7367	-0.7367	-0.7367	-0.7367	-0.7367	-0.7367	-0.7367	-0.7367	-0.7367	-0.7367	-0.7367	-0.7367	-0.7367	-0.7367	-0.7367	-0.7367	-0.7367	-0.7367						-0.2315	-0.2315	-0.2315	-0.2315	-0.2315	-0.2315
YBR250W	SPO23	-0.5973	-0.5973	-0.5973	-0.5973	-0.5973	-0.5973	-0.5973	-0.5973	-0.5973	-0.5973	-0.5973	-0.5973	-0.5973	-0.5973	-0.5973	-0.5973	-0.5973																												-0.5562	-0.5562	-0.5562	-0.5562
YHR135C	YCK1	-0.9067	-0.9067	-0.9067	-0.9067	-0.9467	-0.9708	-0.9708	-0.9708	-0.9708	-0.9708	-0.9708	-0.9708	-0.9708	-0.9708	-0.9708	-0.9708	-0.7042	-0.7042	-0.7042	-0.7042	-0.7042	-0.7042	-0.7042	-0.7042	-0.7042	-0.7042	-0.7042	-0.7042	-0.7042	-0.7042	-0.7042	-0.7042	-0.7042														-0.6289	-0.6289
YMR194W	RPL36A								0.3749	0.3749	0.3749	0.3749	0.3749	0.3749	0.3749	0.3749	0.3749	0.3749	0.3749	-0.4042	-0.4042	-0.4042	-0.4042	-0.4042	-0.4042	-0.4042	-0.4042	-0.4042	-0.4042	-0.4042	-0.4042	-0.4042	-0.4042	-0.4042	-0.4042
YDR441C	APT2	-0.8894	-0.8894	-0.8894	-0.8894	-0.8894	-0.8894	-0.8894	-0.8894	-0.8894	-0.8894
YAL061W	BDH2	-1.0336	-1.0336	-1.0336	-1.0336	-1.0336	-1.0336	-1.0336	-1.0336	-1.0336	-1.0336	-1.0336	-1.0336				-0.3217	-0.3217	-0.3217	-0.3217	-0.3217	-0.3217	-0.3217	-0.3217	-0.3217	-0.3217	-0.3217	-0.3217	-0.3217			-0.4074	-0.4074	-0.4074	-0.4074	-0.4074	-0.4074	-0.4074	-0.4074	-0.4074	-0.4074	-0.4074	-0.2524	-0.2524	-0.2524	-0.2524	-0.2524	-0.2524	-0.2524
YER092W	IES5		-0.3217	-0.3217	-0.3217	-0.3217	-0.3217	-0.3217	-0.3217	-0.3217	-0.3217	-0.3217	-0.3217
YLR214W	FRE1	-1.0778	-1.0778	-1.0778	-1.0778	-1.0778	-1.0778	-1.0778											-1.426	-1.426	-1.426	-1.426	-1.426	-1.426	-1.426	-1.426	-1.426	-1.426	-1.426	-1.426	-1.426	-1.426	-1.426	-1.426	-1.426	-1.426									-0.45	-0.45	-0.45	-0.45	-0.45
YBR050C	REG2	-0.6251	-0.6251	-0.6251	-0.6251	-0.6251									-0.1373	-0.1373	-0.1373	-0.1373	-0.1373	-0.1373	-0.1373	-0.1373	-0.1373	-0.1373		-0.1224	-0.1224	-0.1224	-0.1224	-0.1224	-0.1224	-0.1224	-0.1224	-0.1224	-0.3513	-0.5039	-0.5039	-0.5039	-0.5039	-0.5039	-0.5039	-0.5039	-0.5039	-0.5039	-0.5039				-0.7238
YOR062C																																									-0.3997	-0.3997	-0.3997	-0.3997	-0.3997	-0.3997	-0.3997	-0.3997	-0.3997
YMR316W	DIA1	-0.6055	-0.6055	-0.6055	-0.6055	-0.6055	-0.6055	-0.6055	-0.6055	-0.6055	-0.6055	-0.6055			-0.5415	-0.5415	-0.5415	-0.5415	-0.5415	-0.5415	-0.5415	-0.5415	-0.5415	-0.5415	-0.5415	-0.5415	-0.5909	-0.5909	-0.5909	-0.5909	-0.5909	-0.5909	-0.5909	-0.5909	-0.5909	-0.5909	-0.5909									-0.129	-0.129	-0.129	-0.129
YNR067C	DSE4	-0.2811	-0.2811	-0.2811	-0.9788	-0.9788	-0.9788	-0.9788	-0.9788	-0.9788	-0.9788	-0.9788	-0.9788	-0.9788	-0.9788	-0.9788	-0.9788																			-1.2885	-1.2885	-1.2885	-1.2885	-1.2885	-1.2885	-1.2885	-1.2885	-1.2885	-1.2885	-1.2885	-1.2885	-1.2885	-1.2885
YPL223C	GRE1	-0.9266	-0.9266	-0.9266	-0.9266	-0.9266	-0.9266	-0.9266	-0.9266	-0.9266	-0.9266	-0.9266	-0.9266	-0.9266	-0.9266	-0.9266			-0.3944	-0.3944	-0.3944	-0.3944	-0.3944	-0.3944	-0.3944	-0.3944	-0.3944	-0.3944	-0.3944	-0.3944	-0.3944	-0.3944	-0.3944	-0.3944	-0.534	-0.5938	-0.5938	-0.5938	-0.5938	-0.5938	-0.5938	-0.5938	-0.5938	-0.5938	-0.5938	-0.5938	-0.5938	-0.5938	-0.5938
YHR033W		-0.6619	-0.6619	-0.6619	-0.6619	-0.6619	-0.6619	-0.6619	-0.6619	-0.6619			0.3106	0.3106	0.3106	0.3106	0.3106	0.3106	0.3106	0.3106	0.3106	0.3106	0.3106						-0.4157	-0.4157	-0.4157	-0.4157	-0.4157	-0.4157	-0.4157	-0.4157	-0.4157	-0.4157	-0.4157	-0.4157	-0.4157	-0.4157	-0.4157	-0.4157	-0.4157	-0.2628	-0.2628	-0.2628	-0.2628
YGL031C	RPL24A
YMR193W	MRPL24	-0.0587	-0.0587	-0.0587	-0.0587	-0.0587	-0.0587	-0.0587	-0.0587	-0.0587	-0.0587	-0.0587	-0.0711	-0.0835	-0.0835	-0.0835	-0.0835	-0.0835	-0.0835	-0.0835	-0.0835	-0.0835	-0.0835	-0.0835	-0.0835	-0.0835	-0.0835	-0.0835		-0.8071	-0.8071	-0.8071	-0.8071	-0.8071	-0.8071	-0.8071	-0.8071	-0.8071	-0.8071	-0.8071	-0.8071			0.0002	0.0002	0.0002	0.0002	0.0002	0.0002
YLR059C	REX2	-0.2222	-0.2222	-0.2222	-0.2222	-0.2222	-0.2222	-0.2222	-0.2222	-0.2222	-0.2222	-0.2222																	-0.9931	-0.9931	-0.9931	-0.9931	-0.9931	-0.9931	-0.9931	-0.9931	-0.9931	-0.9931	-0.9931	-0.9931	-0.9931	-0.9931	-0.9931	-0.9931
YOR271C	FSF1					-0.9384	-0.9384	-0.9384	-0.9384	-0.9384	-0.9384	-0.9384	-0.9384	-0.9384	-0.9384	-0.9384	-0.9384	-0.9384	-0.9384	-0.9384	-0.9384	-0.9384																					-0.4327	-0.4327	-0.4327	-0.4327	-0.4327	-0.4327	-0.4327
YKL062W	MSN4																																	-1.3514	-1.3514	-1.3514	-1.3514	-1.3514	-1.3514	-1.3514	-1.3514	-1.3514	-1.3514	-1.3514				-0.7176	-0.7176
YNL036W	NCE103																																									-0.7505	-0.7505	-0.7505	-0.7505	-0.7505	-0.7505	-0.7505	-0.7505
YNL270C	ALP1	-0.8363	-0.8363	-0.8363	-0.8363	-0.8363	-0.8363	-0.8363																							-0.6955	-0.6955	-0.6955	-0.6955	-0.6955	-0.6955	-0.6955	-0.6955	-0.6955	-0.6955	-0.6955	-0.6955	-0.6955	-0.6955	-0.6955	-0.6955
YNL067W	RPL9B		-1.1697	-1.1697	-1.1697	-1.1697	-1.1697	-1.1697	-1.1697	-1.1697	-1.1697	-1.1697	-1.1697	-1.1697	-1.1697	-1.1697			-0.9591	-0.9591	-0.9591	-0.9591	-0.9591	-0.9591	-0.9591	-0.9591	-0.9591	-0.9591	-0.9591	-0.9591	-0.9591	-0.9591
YHR061C	GIC1	-0.2814	-0.2814	-0.2814	-0.2814	-0.2814	-0.2814	-0.2814	-0.2814	-0.2814	-0.2814	-0.2814	-0.2814	-0.2814	-0.2814	-0.2814
YMR056C	AAC1	-0.0922	-0.0922	-0.0922	-0.0922	-0.0922	-0.0922	-0.0922	-0.0922	-0.0922	-0.0922					-1.0847	-1.0847	-1.0847	-1.0847	-1.0847	-1.0847	-1.0847	-1.0847	-1.0847	-1.0847	-1.0847	-1.0847	0.2633	0.2633	0.2633	0.2633	0.2633	0.2633	0.2633	0.2633	0.2633	0.2633	0.2633	0.2633	0.2633	0.2633								-0.4372
YLR194C		-1.0461			-0.6145	-0.6145	-0.6145	-0.6145	-0.6145	-0.6145	-0.6145	-0.6145	-0.6145	-0.6145	-0.6145	-0.6145	-0.6145	-0.6145	-0.6145	-0.6145	-0.8472	-0.8472	-0.8472	-0.8472	-0.8472	-0.8472	-0.8472	-0.8472	-0.8472	-0.8472	-0.8472	-0.8472	-0.8472	-0.8472	-0.8472	-0.8472	-0.8472	-0.8472										-0.4148	-0.4148
YMR199W	CLN1																														-1.0993	-1.0993	-1.0993	-1.0993	-1.0993	-1.0993	-1.0993	-1.0993	-1.0993	-1.0993	-1.0993	-1.0993	-1.0993		-1.0587	-1.0587	-1.0587	-1.0587	-1.0587
YJR096W		-0.4264	-0.4264	-0.4264	-0.4264	-0.4264	-0.4264	-0.4264	-0.4264	-0.4264	-0.4264	-0.4264	-0.4264	-0.6972	-0.6972	-0.6972	-0.6972	-0.6972	-0.6972	-0.6972	-0.6972	-0.6972	-0.6972		0.0742	0.0742	0.0742	0.0742	0.0742	0.0742	0.0742	0.0742	0.0742	0.0742	0.0742	0.0742	0.0742	0.0742	0.0742	0.0742	0.0742	0.0742						-0.1035	-0.1035
YIL065C	FIS1	-0.7367	-0.7367	-0.7367	-0.7367	-0.7367	-0.7367	-0.7367	-0.7367	-0.7367	-0.7367	-0.7367	-0.7367	-0.7367	-0.7367	-0.7367	-0.7367		-0.6792	-0.6792	-0.6792	-0.6792	-0.6792	-0.6792	-0.6792	-0.6792	-0.6792	-0.6792	-0.6792	-0.6792	-0.6792	-0.6792	-0.6792	-0.6792	-0.6792						-0.0322	-0.0322	-0.0322	-0.0322	-0.0322	-0.0322	-0.0322	-0.0322	-0.0322
YGR024C	THG1	0.3188	0.3188	0.3188	0.0234	0.0234	0.0234	0.0234	0.0234	0.0234	0.0234	0.0234	0.0234	0.0234	0.0234	0.0234	0.0234	0.0234	0.0234	0.0234		-0.0097	-0.0097	-0.0097	-0.0097	-0.0097	-0.0097	-0.0097	-0.0097	-0.0097	-0.0097	-0.0097	-0.0097	-0.0097
YCL005W	LDB16									-0.2816	-0.2816	-0.2816	-0.2816	-0.2816	-0.2816	-0.2816	-0.2816	-0.2816	-0.2816	-0.5371	-0.5371	-0.5371	-0.5371	-0.5371	-0.5371	-0.5371	-0.5371	-0.5371	-0.5371	-0.5371	-0.5371	-0.5371	-0.5371	-0.5371	-0.5371	-0.5371	-0.5371	-0.5371
YAL062W	GDH3	-1.1962	-1.1962	-1.1962	-1.1962	-1.1962	-1.1962	-1.1962	-1.1962	-1.1962	-1.1962	-1.1962	-1.1962	-1.1962	-1.1962						-0.7202	-0.7202	-0.7202	-0.7202	-0.7202	-0.7202	-0.7202	-0.7202	-0.7202	-0.7202	-0.7202	-0.7202	-0.7202
YDL232W	OST4	-0.7962	-0.7962	-0.7962	-0.7962	-0.7962	-0.7962	-0.7962	-0.7962	-0.7962	-0.7962	-0.7962	-0.7962	-0.7962	-0.7962	-0.7962	-0.7962	-0.7962	-0.7962							-0.7523	-0.7523	-0.7523	-0.7523	-0.7523	-0.7523	-0.7523	-0.7523	-0.7523	-0.7523	-0.7523											-0.2922	-0.2922	-0.2922
YNL147W	LSM7	-0.6952	-0.6952	-0.6952	-0.6952	-0.6952	-0.6952	-0.672	-0.5332	-0.5332	-0.5332	-0.5332	-0.5332	-0.5332	-0.5332	-0.5332	-0.5332	-0.5332	-0.5332		-1.3503	-1.3503	-1.3503	-1.3503	-1.3503	-1.3503	-1.3503	-1.3503	-1.3503	-1.3503	-1.3503	-1.3503	-1.3503	-1.3503	-1.3503	-1.3503	-1.3503	-1.3503
YLR377C	FBP1																-0.8098	-0.8098	-0.8098	-0.8098	-0.8098	-0.8098	-0.8098	-0.8098	-0.8098	-0.8098	-0.8098	-0.8098	-0.8098	-0.8098	-0.8098	-0.8098	-0.8098	-0.8098			-0.2489	-0.2489	-0.2489	-0.2489	-0.2489	-0.2489	-0.2489	-0.2489	-0.2489	-0.2489	-0.2489	-0.2489	-0.2489
YGR168C		-0.8242	-0.8242	-0.8242	-0.8242	-0.8242	-0.8242	-0.8165	-0.8165	-0.8165	-0.8165	-0.8165	-0.8165	-0.8165	-0.8165	-0.8165	-0.8165	-0.8165	-0.8165				-1.3217	-1.3217	-1.3217	-1.3217	-1.3217	-1.3217	-1.3217	-1.3217	-1.3217	-1.3217	-1.3217	-1.3217	-1.3217	-1.3217	-1.3217
YLR307C-A		0.0173	0.0173	0.0173	0.0173	0.0173	0.0173	0.0173	0.0173	0.0173	0.0173	0.0173	0.0173	0.0173	0.0171	0.0171	0.0171	0.0171	0.0171	0.0171	0.0171	0.0171	0.0171	0.0171	0.0171																								-0.6382
YNL241C	ZWF1	-0.6605	-0.6605	-0.6605	-0.6605								-1.0475	-1.0475	-1.0475	-1.0475	-1.0475	-1.0475	-1.0475	-1.0475	-1.0475	-1.0475
YBL013W	FMT1	0.5884	0.5884	0.5884	0.5884	0.5884	0.5884	0.5884	0.5884	0.5884	0.5884	0.5884	0.5884	0.5884	0.5366	0.0711	0.0711	0.0711	0.0711	0.0711	0.0711	0.0711	0.0711	0.0711	0.0711	0.0711	0.0711	0.0711	0.0711	0.0711	0.0711
YBR201C-A											-0.593	-0.593	-0.593	-0.593	-0.593	-0.593	-0.593	-0.593	-0.593	-0.593	-0.593
YGR239C	PEX21																-0.7039	-0.7039	-0.7039	-0.7039	-0.7039	-0.7039	-0.7039	-0.7039	-0.7039	-0.7039	-0.7039	-0.7039	-0.7039	-0.7039	-0.7039	-0.7039	-0.7039	-0.7039	-0.7039
YKL160W	ELF1	-0.2368	-0.2368	-0.2368	-0.2368	-0.2368	-0.2368	-0.2368	-0.2368	-0.2368	-0.2368	-0.2368	-0.2368	-0.2368	-0.2368	-0.2368		-1.6587	-1.6587	-1.6587	-1.6587	-1.6587	-1.6587	-1.6587	-1.6587	-1.6587	-1.6587	-1.6587	-1.6587
YKR030W	GMH1	0.4819	0.4819	0.4819	0.4819	0.4819	0.4819	0.4819	0.4819	0.4819	0.4819	0.4819				0.6905	0.6905	0.6905	0.6905	0.6905	0.6905	0.6905	0.6905	0.6905	0.6905	0.6905	0.6905	0.6905	0.6905	0.6905	0.6905									-0.5732	-0.5732	-0.5732	-0.5732	-0.5732	-0.5732	-0.5732	-0.5732	-0.5732	-0.5732
YML027W	YOX1	-1.3009	-1.3009	-1.3009	-1.3009	-1.3009	-1.3009	-1.3009	-1.3009	-1.3009	-1.3009	-1.3009	-1.3009	-1.3009	-1.3009	-1.3009	-1.3009													-0.9891	-0.9891	-0.9891	-0.9891	-0.9891	-0.9891	-0.9891	-0.9891	-0.9891	-0.9891	-0.9891	-0.9891	-0.9891	-0.9891		-1.2495	-1.2495	-1.2495	-1.2495	-1.2495
YFL017C	GNA1	-0.6112					-0.6213	-0.6213	-0.6213	-0.6213	-0.6213	-0.6213	-0.6213	-0.6213	-0.6213	-0.6213	-0.6213	-0.6213	-0.6213	-0.6213																											0.2056	0.2056	0.2056
YGR236C	SPG1	-0.3618	-0.3618	-0.3618	-0.3618	-0.5271	-0.8577	-0.8577	-0.8577	-0.8577	-0.8577	-0.8577	-0.8577	-0.8577	-0.8577	-0.8577	-0.8577	-0.8577	-0.8577	-0.8577	-0.6657	-0.4737	-0.4737	-0.4737	-0.4737	-0.4737	-0.4737	-0.4737	-0.4737	-0.4737	-0.4737	-0.4737	-0.4737	-0.4737											-0.8719	-0.8719	-0.8719	-0.8719	-0.8719
YHR162W						-0.6681	-0.6681	-0.6681	-0.6681	-0.6681	-0.6681	-0.6681	-0.6681	-0.6681	-0.6681	-0.6681	-0.6681	-0.6681	-0.6681	-0.6681	-0.6681	-0.6681	-0.4212	-0.4212	-0.4212	-0.4212	-0.4212	-0.4212	-0.4212	-0.4212	-0.4212	-0.4212	-0.4212	-0.4212	-0.4212	-0.4212	-0.4212											-0.6778	-0.6778
YDR007W	TRP1	0.2977	0.2977	0.2977	0.2977	0.2977	0.2977	0.2977	0.3663	0.5263	0.5263	0.5263	0.5263	0.5263	0.5263	0.5263	0.5263	0.5263	0.5263	0.5263	0.5263	0.5263						0.2633	0.2633	0.2633	0.2633	0.2633	0.2633	0.2633	0.2633	0.2633	0.2633	0.2633	0.2633	0.2633	0.2633	0.2633	0.2633	0.2633	-0.2451	-0.2451	-0.2451	-0.2451	-0.2451
YPL137C	GIP3	-0.0221	-0.0221	-0.0221	-0.0221	-0.0221	-0.0221	-0.0221	-0.0221	-0.0221	-0.0221	-0.0221	-0.0221	-0.0221	-0.4414	-0.5463	-0.5463	-0.5463	-0.5463	-0.5463	-0.5463	-0.5463	-0.5463	-0.5463	-0.5463	-0.5463	-0.5463	-0.5463	-0.5463	-0.5463	-0.5463
YNL222W	SSU72				0.0836	0.0836	0.0836	0.0836	0.0836	0.0836	0.0836	0.0836	0.0836	0.0836	0.0836	0.0836	0.0836	0.0836			-0.7591	-0.7591	-0.7591	-0.7591	-0.7591	-0.7591	-0.7591	-0.7591	-0.7591	-0.7591	-0.7591	-0.7591	-0.7591	-0.7591													-0.1919	-0.1919	-0.1919
YOR358W	HAP5	-0.1427	-0.1427	-0.1427	-0.1427	-0.1427	-0.1427	-0.1427	-0.1427	-0.1427	-0.1427			-0.1373	-0.1373	-0.1373	-0.1373	-0.1373	-0.1373	-0.1373	-0.1373	-0.1373	-0.1373	-0.1373	-0.1373	-0.1373	-0.1373	-0.1373	-0.1373	-0.1373											-0.5627	-0.5627	-0.5627	-0.5627	-0.5627	-0.5627	-0.5627	-0.5627	-0.5627
YCL055W	KAR4							-0.5896	-0.5896	-0.5896	-0.5896	-0.5896	-0.5896	-0.5896	-0.5896	-0.5896	-0.5896	-0.5896	-0.5896
YMR145C	NDE1																															-0.4372	-0.4372	-0.4372	-0.4372	-0.4372	-0.4372	-0.4372	-0.4372	-0.4372	-0.4372	-0.4372	-0.4372	-0.4372		-0.7087	-0.7087	-0.7087	-0.7087
YKL008C	LAC1
YOR095C	RKI1						-1.369	-1.369	-1.369	-1.369	-1.369	-1.369	-1.369	-1.369	-1.369	-1.369	-0.8327	-0.8327	-0.8327	-0.8327	-0.8327	-0.8327	-0.8327	-0.8327	-0.8327	-0.8327	-0.8327	-0.8327	-0.8327	-0.8327
YDL072C	YET3	-0.0487	-0.0487	-0.0487	-0.0487	-0.0487	-0.0487	-0.0487	-0.0487	-0.0487	-0.4372	-0.4372	-0.4372	-0.4372	-0.4372	-0.4372	-0.4372	-0.4372	-0.4372	-0.4372	-0.4372	-0.4372	-0.4372	-0.4372	-0.4372	-0.4372	-0.4372	-0.4372	0.2019	0.2019	0.2019	0.2019	0.2019	0.2019	0.2019	0.2019	0.2019	0.2019	0.2019	0.2019	0.2019	0.2019	0.2019	0.2019					-0.4168
YDR076W	RAD55	-0.0295	-0.0295	-0.0295	-0.0295	-0.0295	-0.0295	-0.0295	-0.0295	-0.0295	-0.0295	-0.0295	-0.0295	-0.0295
YDR500C	RPL37B	0.2062	0.2062	0.2062	0.2062
YOR052C															-0.8417	-0.8417	-0.8417	-0.8417	-0.8417	-0.8417	-0.8417	-0.8417	-0.8417	-0.8417	-0.8417	-0.8417	-0.8417	-0.8417	-0.8417															-0.9183	-0.9183	-0.9183	-0.9183	-0.9183	-0.9183
YIL154C	IMP2'	0.3174	0.3174	0.3174	0.3174	0.3174	0.3174	0.3174	0.3174	0.3174	-0.336	-0.336	-0.336	-0.336	-0.336	-0.336	-0.336	-0.336	-0.336	-0.336	-0.336	-0.336	-0.336	-0.336	-0.336	-0.336		-0.3106	-0.3106	-0.3106	-0.3106	-0.3106	-0.3106	-0.3106	-0.3106	-0.3106	-0.3106	-0.3106	-0.3106	-0.3106	-0.3106
YDL086W			-0.4115	-0.4115	-0.4115	-0.4115	-0.4115	-0.4115	-0.4115	-0.4115	-0.4115	-0.4115	-0.4115	-0.4115	-0.4115	-0.4115	-0.4115									-0.5216	-0.5216	-0.5216	-0.5216	-0.5216	-0.5216	-0.5216	-0.5216	-0.5216	-0.5216	-0.5216	-0.5216	-0.5216	-0.5216	-0.5216	-0.5216	-0.5216	-0.5216	-0.5216			-0.4576	-0.4576	-0.4576
YGL047W	ALG13	0.6486	0.6486	0.6486	0.6486	0.6486	0.6486	0.6486	0.6486	0.6486	-0.0751	-0.0751	-0.0751	-0.0751	-0.0751	-0.0751	-0.0751	-0.0751	-0.0751	-0.0751	-0.0751				-0.6972	-0.6972	-0.6972	-0.6972	-0.6972	-0.6972	-0.6972	-0.6972	-0.6972	-0.6972	-0.6972
YDR034W-B																																									-0.6112	-0.6112	-0.6112	-0.6112	-0.6112	-0.6112	-0.6112	-0.6112	-0.6112
YNL160W	YGP1							-1.0943	-1.0943	-1.0943	-1.0943	-1.0943	-1.0943	-1.0943	-1.0943	-1.0943	-1.0943	-1.0943	-1.0943	-0.5485	-0.5485	-0.5485	-0.5485	-0.5485	-0.5485	-0.5485	-0.5485	-0.5485	-0.5485	-0.5485	-0.5485									-1.0738	-1.0738	-1.0738	-1.0738	-1.0738	-1.0738	-1.0738	-1.0738	-1.0738	-1.0738
YLR120C	YPS1	-0.9611	-0.9611	-0.9611	-0.9611	-0.9611	-0.9611	-0.9611	-0.9611									-0.8441	-0.8441	-0.8441	-0.8441	-0.8441	-0.8441	-0.8441	-0.8441	-0.8441	-0.8441	-0.8441	-0.8441	-0.8441	-0.8441	-0.8441	-0.8441									-0.1411	-0.1411	-0.1411	-0.1411	-0.1411	-0.1411	-0.1411	-0.1411
YMR081C	ISF1	-1.2811	-1.2811	-1.2811	-1.2811	-1.2811	-1.2811	-1.2811	-1.2811																		-1.106	-1.106	-1.106	-1.106	-1.106	-1.106	-1.106	-1.106	-1.106	-1.106	-1.106
YPL134C	ODC1	-0.6471	-0.6471	-0.6471	-0.6471	-0.6471	-0.6471	-0.6471	-0.6471	-0.6471	-0.6471	-0.6471	-0.6471	-0.6471	-0.6471	-0.6471		-0.5923	-0.5923	-0.5923	-0.5923	-0.5923	-0.5923	-0.5923	-0.5923	-0.5923	-0.5923	-0.5923	-0.5923	-0.5923	-0.5923	-0.5923	-0.5923	-0.5923				-1.2974	-1.2974	-1.2974	-1.2974	-1.2974	-1.2974	-1.2974	-1.2974	-1.2974	-1.2974	-1.2974	-1.2974
YGL253W	HXK2
YDR367W																																								-0.7176	-0.7176	-0.7176	-0.7176	-0.7176	-0.7176	-0.7176	-0.7176	-0.7176	-0.7176
YOR161C	PNS1	-0.7874	-0.7874	-0.7874	-0.7874	-0.7874	-0.7874	-0.7874	-0.7874	-0.7874	-0.7874	-0.7874																																					-0.7505
YKL026C	GPX1	0.1258			-0.6372	-0.6372	-0.6372	-0.6372	-0.6372	-0.6372	-0.6372	-0.6372	-0.6372	-0.6372	-0.6372	-0.6372	-0.6372	-0.6372	-0.6372	-0.129	-0.129	-0.129	-0.129	-0.129	-0.129	-0.129	-0.129	-0.129	-0.129	-0.0602	0.2153	0.2153	0.2153	0.2153	0.2153	0.2153	0.2153	0.2153	0.2153	0.2153	0.2153	0.2153	0.2153	0.2153	0.2153	0.2153	0.2153	0.2153	-0.1411
YPL049C	DIG1	-0.6638	-0.6638	-0.6638	-0.6638						-0.8152	-0.8152	-0.8152	-0.8152	-0.8152	-0.8152	-0.8152	-0.8152	-0.8152	-0.8152	-0.8152	-0.8152	-0.8152	-0.8152	-0.8152	-0.8152	-0.8152	-0.8152	-0.9891	-1.0587	-1.0587	-1.0587	-1.0587	-1.0587	-1.0587	-1.0587	-1.0587	-1.0587	-1.0587	-1.0587	-1.0587	-1.0587	-1.0587	-1.0587	-1.0587	-1.0587
YDR384C	ATO3	-1.866	-1.866	-1.866	-1.866	-1.866	-1.866	-1.866	-1.866	-1.866	-1.866	-1.866	-1.866	-1.866	-1.866												-0.9655	-0.9655	-0.9655	-0.9655	-0.9655	-0.9655	-0.9655	-0.9655	-0.9655	-0.9655	-0.9655	-0.9655	-0.9655	-0.9655	-0.9655	-0.9655	-0.9655	-0.9655	-0.3675	-0.3675	-0.3675	-0.3675	-0.3675
YGL254W	FZF1	0.2556	0.2556	0.2556	-0.0838	-0.2535	-0.2535	-0.2535	-0.2535	-0.2535	-0.2535	-0.2535	-0.2535	-0.2535	-0.2535	-0.2535	-0.2535	-0.2535	-0.2535	-0.2535	-0.2535	-0.5544	-0.5544	-0.5544	-0.5544	-0.5544	-0.5544	-0.5544	-0.5544	-0.5544	-0.5544	-0.5544	-0.5544	-0.5544	-0.5544												-1.0649	-1.0649	-1.0649
YJL037W	IRC18		0.0836	0.0836	0.0836	0.0836	0.0836	0.0836	0.0836	0.0836	0.0836	0.0836	0.083	0.0827	0.0827	0.0827	0.0827	0.0827	0.0827	0.0827	0.0827	0.0827	0.0827	0.0827	0.0827								-0.0504	-0.0504	-0.0504	-0.0504	-0.0504	-0.0504	-0.0504	-0.0504	-0.0504	-0.0504	-0.0504	-0.0504	-0.0504	-0.0504
YHL016C	DUR3	-0.5896	-0.5896	-0.5896	-0.5896	-0.5896	-0.5896	-0.5896	-0.5896	-0.5896	-0.5896	-0.5896	-0.5896	-0.5896	-0.5896
YOL122C	SMF1	-0.9067	-0.9067	-0.9067	-0.9067	-0.9067	-0.9067	-0.9067	-0.9067	-0.9067	-0.9067	-0.9067	-0.9067	-0.9067	-0.9067	-0.9067	-0.6171	-0.6171	-0.6171	-0.6171	-0.6171	-0.6171	-0.6171	-0.6171	-0.6171	-0.6171	-0.6171	-0.6171	-0.6171	-0.6171							-0.2477	-0.2477	-0.2477	-0.2477	-0.2477	-0.2477	-0.2477	-0.2477	-0.2477	-0.2477	-0.2477	-0.2477	-0.2477
YCR004C	YCP4	-0.9173	-0.9173	-0.9173	-0.9173	-0.9173	-0.9173	-0.9173	-0.9173														-1.165	-1.165	-1.165	-1.165	-1.165	-1.165	-1.165	-1.165	-1.165	-1.165	-1.165	-1.165													-0.7283	-0.7283	-0.7283
YIR014W												0.0568	0.0568	0.0568	0.0568	0.0568	0.0568	0.0568	0.0568	0.0568	0.0568	0.0568	0.0568	0.0568	0.0568	-0.3868	-0.3868	-0.3868	-0.3868	-0.3868	-0.3868	-0.3868	-0.3868	-0.3868	-0.3868	-0.3868													-0.1518
YOR040W	GLO4	-0.0872		-1.3217	-1.3217	-1.3217	-1.3217	-1.3217	-1.3217	-1.3217	-1.3217	-1.3217	-1.3217	-1.3217	-1.3217	-1.3217	-1.3217	-1.3217									-0.2616	-0.2616	-0.2616	-0.2616	-0.2616	-0.2616	-0.2616	-0.2616	-0.2616	-0.2616	-0.2616	-0.2616	-0.2616	-0.2616	-0.2616	-0.2616	-0.2616	-0.2616		0.4748	0.4748	0.4748	0.4748
YDL008W	APC11	0.3564	0.3564	0.3564	0.3564	0.3564	0.3564	0.3564	0.3564			0.1637	0.1637	0.1637	0.1637	0.1637	0.1637	0.1637	0.1637	0.1637	0.1637	0.1637	0.1637	0.1637	0.1637	0.1637	0.1637			-0.1322	-0.1322	-0.1322	-0.1322	-0.1322	-0.1322	-0.1322	-0.1322	-0.1322	-0.1322	-0.1322
YOL155C	HPF1	-0.4792	-0.4792								-0.8846	-0.8846	-0.8846	-0.8846	-0.8846	-0.8846	-0.8846	-0.8846	-0.8846	-0.8846	-0.8846	-0.8846	-0.8846	-0.8846	-0.8846	-0.8846	-0.8846	-0.8846			-0.5973	-0.5973	-0.5973	-0.5973	-0.5973	-0.5973	-0.5973	-0.5973	-0.5973	-0.5973	-0.5973	-0.5973	-0.5973	-0.5973	-0.5973	-0.5973	-0.5973	-0.5973	-1.0156
YLL028W	TPO1																																											-0.4286	-0.4286	-0.4286	-0.4286	-0.4286	-0.4286
YEL012W	UBC8							-0.3217	-0.3217	-0.3217	-0.3217	-0.3217	-0.3217	-0.3217	-0.3217	-0.3217	-0.3217	-0.3217	-0.3217	-0.3217	-0.3217	-0.3217	-0.5476	-0.6041	-0.6041	-0.6041	-0.6041	-0.6041	-0.6041	-0.6041	-0.6041	-0.6041	-0.6041	-0.6041	-0.6041
YOR092W	ECM3	-1.2043	-1.2043	-1.2043	-1.2043	-1.2043	-1.2043	-1.2043	-1.2043	-1.2043	-0.8866	-0.8071	-0.8071	-0.8071	-0.8071	-0.8071	-0.8071	-0.8071	-0.8071	-0.8071	-0.8071	-0.8071	-0.8071																									-1.2566	-1.2566
YLR137W						-0.6145	-0.6145	-0.6145	-0.6145	-0.6145	-0.6145	-0.6145	-0.6145	-0.6145	-0.6145	-0.6145	-0.6145	-0.6145	-0.6145	-0.6145	-0.6145	-0.6145	-0.6145	-0.6145	-0.7002	-0.7002	-0.7002	-0.7002	-0.7002	-0.7002	-0.7002	-0.7002	-0.7002	-0.7002	-0.7002			-0.3957	-0.3957	-0.3957	-0.3957	-0.3957	-0.3957	-0.3957	-0.3957	-0.3957	-0.3957		-0.732
YCR060W	TAH1	-0.3768	-0.3768	-0.3768	-0.3768	-0.3768	-0.2877	-0.2877	-0.2877	-0.2877	-0.2877	-0.2877	-0.2877	-0.2877	-0.2877	-0.2877	-0.2877	-0.2877	-0.2877	-0.2877	-0.2877	-0.2877	-0.2877	-0.3166	-0.4032	-0.4032	-0.4032	-0.4032	-0.4032	-0.4032	-0.4032	-0.4032	-0.4032	-0.4032	-0.4032	-0.4032	-0.4032	-0.4032	-0.4032	-0.4032	-0.4032				-0.4521	-0.4521	-0.4521	-0.4521	-0.4521
YJR113C	RSM7												-0.8363	-0.8363	-0.8363	-0.8363	-0.8363	-0.8363	-0.8363	-0.8363	-0.8363	-0.8363	-0.8363	-0.8363	-0.8363	-0.8363	-0.8363	-0.8363	-0.8363	-0.8363
YGR096W	TPC1	-0.3695	-0.3695	-0.4875	-0.6646	-0.6646	-0.6646	-0.6646	-0.6646	-0.6646	-0.6646	-0.6646	-0.6646	-0.6646	-0.6646	-0.6646	-0.6646	-1.0114	-1.0114	-1.0114	-1.0114	-1.0114	-1.0114	-1.0114	-1.0114	-1.0114	-1.0114	-1.0114	-1.0114	-1.0114	-1.0114	-1.0114	-1.0114	-1.0114	-1.0114													-0.0295	-0.0295
YPL256C	CLN2	-0.6894	-0.6894	-0.6894	-0.6894	-0.6894	-0.6894	-0.6894	-0.6894	-0.6894																																			-0.5393	-0.5393	-0.5393	-0.5393	-0.5393
YMR015C	ERG5
YDR214W	AHA1	-0.9865	-0.9865	-0.9865	-0.9865	-0.9865	-0.9067	-0.9067	-0.9067	-0.9067	-0.9067	-0.9067	-0.9067	-0.9067	-0.9067	-0.9067	-0.9067	-0.9067	-0.9067	-0.9067	-0.9067	-0.9067	-0.9067	-0.9067	-0.9067
YER001W	MNN1																														-0.6656	-0.6656	-0.6656	-0.6656	-0.6656	-0.6656	-0.6656	-0.6656	-0.6656	-0.6656							-1.3441	-1.3441	-1.3441
YDR453C	TSA2										0.0002	0.0002	0.0002	0.0002	0.0002	0.0002	0.0002	0.0002	0.0002	0.0002	0.0002	-0.2413	-0.7245	-0.7245	-0.7245	-0.7245	-0.7245	-0.7245	-0.7245	-0.7245	-0.7245	-0.7245	-0.7245	0.4255	0.4255	0.4255	0.4255	0.4255	0.4255	0.4255	0.4255	0.4255	0.4255	0.4255	0.4255	0.4255	0.4255	0.4255	0.4255
YHR100C		0.1021	0.1021	0.1021	0.1021	0.1021	0.1021	0.1021	0.1021	0.1021	0.1021	0.1021	0.1021														-0.8043	-0.8043	-0.8043	-0.8043	-0.8043	-0.8043	-0.8043	-0.8043	-0.8043	-0.8043	-0.8043	-0.0097	-0.0097	-0.0097	-0.0097	-0.0097	-0.0097	-0.0097	-0.0097	-0.0097	-0.0097	-0.0097
YCL009C	ILV6	-0.259	-0.259	-0.3957	-0.3957	-0.3957	-0.3957	-0.3957	-0.3957	-0.3957	-0.3957	-0.3957	-0.3957	-0.3957	-0.3957	-0.3957	-0.3957	-0.3957	-0.3957	-0.3957			-0.4492	-0.4492	-0.4492	-0.4492	-0.4492	-0.4492	-0.4492	-0.4492	-0.4492	-0.4492	-0.4492	-0.4492	-0.4492	-0.4492	0.1637	0.1637	0.1637	0.1637	0.1637	0.1637	0.1637	0.1637	0.1637	0.1637	0.1637	0.1637	0.1637
YOR298C-A	MBF1	-0.1341	-0.1341	-0.1341	-0.1341	-0.1341	-0.1341	-0.1341	-0.1341									-0.6812	-0.6812	-0.6812	-0.6812	-0.6812	-0.6812	-0.6812	-0.6812	-0.6812	-0.6812	-0.6812
YOR349W	CIN1
YKR045C		0.3334	0.3334		0.2249	0.2249	0.2249	0.2249	0.2249	0.2249	0.2249	0.2249	0.2249	0.2249	0.2249	0.2249							-0.0657	-0.0657	-0.0657	-0.0657	-0.0657	-0.0657	-0.0657	-0.0657	-0.0657	-0.0657	-0.0657	-0.0657	-0.0657
YDL127W	PCL2	-0.7367	-0.7367	-0.7367	-0.7367	-0.7367	-0.7367	-0.7367	-0.7367	-0.7367	-0.7367	-0.7367	-0.7367	-0.7367																		-0.7269	-0.7269	-0.7269	-0.7269	-0.7269	-0.7269	-0.7269	-0.7269	-0.7269	-0.7269	-0.7269	-0.7269	-0.7269	-0.7269	-0.7269
YLR179C		-0.3812	-0.3812	-0.3812	-0.3812	-0.3812	-0.3812	-0.3812	-0.3812	-0.3812	-0.3812
YBR078W	ECM33
YKL128C	PMU1				-0.9203	-0.9203	-0.9203	-0.9203	-0.9203	-0.9203	-0.9203	-0.9203	-0.9203	-0.9203	-1.1373	-1.1373	-1.1373	-1.1373	-1.1373	-1.1373	-1.1373	-1.1373	-1.1373	-1.1373	-1.1373	-1.1373				-0.0717	-0.0717	-0.0717	-0.0717	-0.0717	-0.0717	-0.0717	-0.0717	-0.0717	-0.0717	-0.0717	-0.0717	-0.0717	-0.0717	-0.0717	-0.0717	-0.0717
YHR141C	RPL42B				-0.7523	-0.7523	-0.7523	-0.7523	-0.7523	-0.7523	-0.7523	-0.7523	-0.7523	-0.7523	-0.7523	-0.7523
YKL148C	SDH1	0.0933	0.0933	0.0933	0.0933	0.0933	0.0933	0.0933	0.0933	0.0933	0.0933	0.0236	-0.0461	-0.0461	-0.0461	-0.0461	-0.0461	-0.0461	-0.0461	-0.0461	-0.0461	-0.0461	-0.0461	-0.0461	-0.0461	-0.0461	-0.0461	-0.0461	-0.1129	-0.1797	-0.1797	-0.1797	-0.1797	-0.1797	-0.1797	-0.1797	-0.1797	-0.1797	-0.1797						-0.8804	-0.8804	-0.8804	-0.8804	-0.8804
YCL012C		-0.3618	-0.3618	-0.3618	-0.3618	-0.3618	-0.3618	-0.3618	-0.3618	-0.3618	-0.3618	-0.3618	-0.3618					-1.0587	-1.0587	-1.0587	-1.0587	-1.0587	-1.0587	-1.0587	-1.0587	-1.0587	-1.0587	-1.0587	-1.0587	-1.0587															-0.7578	-0.7578	-0.7578	-0.7578	-0.7578
YJL185C		-0.1904	-0.1904	-0.1904	-0.1904	-0.1904	-0.1904	-0.1904	-0.1904	-0.1904	-0.1904	-0.1904					-0.4236	-0.4236	-0.4236	-0.4236	-0.4236	-0.4236	-0.4236	-0.4236	-0.4236	-0.4236	-0.4236	-0.4236	-0.4236	-0.4236	-0.4236	-0.4236													-0.1597	-0.1597	-0.1597	-0.1597	-0.1597
YPL127C	HHO1	-0.4372	-0.4372	-0.4372	-0.4372																		-1.5491	-1.5491	-1.5491	-1.5491	-1.5491	-1.5491	-1.5491	-1.5491	-1.5491	-1.5491	-1.5491	-1.5491	-1.5491	-1.5491	-1.5491										-1.4372	-1.4372	-1.4372
YLR105C	SEN2								-0.8135	-0.8135	-0.8135	-0.8135	-0.8135	-0.8135	-0.8135	-0.8135	-0.8135	-0.8135	-0.8135	-0.8135	-0.8135				-1.0416	-1.0416	-1.0416	-1.0416	-1.0416	-1.0416	-1.0416	-1.0416	-1.0416	-1.0416					-1.203	-1.203	-1.203	-1.203	-1.203	-1.203	-1.203	-1.203	-1.203	-1.203	-1.203
YER104W	RTT105	-0.4619	-0.4619	-0.4619	-0.4619	-0.4637	-0.4651	-0.4651	-0.4651	-0.4651	-0.4651	-0.4651	-0.4651	-0.4651	-0.4651	-0.4651	-0.4651	-0.4651	-0.4651	-0.4651	-0.4651	-0.4651	-0.4651	-0.4651										0.0568	0.0568	0.0568	0.0568	0.0568	0.0568	0.0568	0.0568	0.0568	0.0568	0.0568	0.0568	0.0568			-0.5118
YGR008C	STF2																			-1.2222	-1.2222	-1.2222	-1.2222	-1.2222	-1.2222	-1.2222	-1.2222	-1.2222	-1.2222	-1.2222	-1.2222	-1.2222	-1.2222	-1.2222					-0.7367	-0.7367	-0.7367	-0.7367	-0.7367	-0.7367	-0.7367	-0.7367	-0.7367	-0.7367	-0.7367
YNL007C	SIS1	0.0589	0.0589	0.0589	0.0589	0.0589	0.0589				-0.0695	-0.0695	-0.0695	-0.0695	-0.0695	-0.0695	-0.0695	-0.0695	-0.0695	-0.0695	-0.0695	-0.0695	-0.0695	-0.0695	-0.0695
YBL018C	POP8								-1.0045	-1.0045	-1.0045	-1.0045	-1.0045	-1.0045	-1.0045	-1.0045	-1.0045	-1.0045	-1.0045	-1.0045	-1.0045						-0.9317	-0.9317	-0.9317	-0.9317	-0.9317	-0.9317	-0.9317	-0.9317	-0.9317	-0.9317	-0.9317	-0.9317
YBR208C	DUR1,2	-0.1258	-0.1258	-0.1258	-0.1258	-0.1258	-0.1258														-0.7606	-0.7606	-0.7606	-0.7606	-0.7606	-0.7606	-0.7606	-0.7606	-0.7606	-0.7606	-0.7606	-0.6202	-0.129	-0.129	-0.129	-0.129	-0.129	-0.129	-0.129	-0.129	-0.129	-0.129	-0.129	-0.129	-0.129	-0.129	-0.129
YOL125W	TRM13
YOL040C	RPS15
YGR183C	QCR9	-0.8363	-0.8363	-0.8363	-0.8363	-0.8363	-0.8363	-0.8363	-0.8363	-0.8363	-0.8478	-0.8478	-0.8478	-0.8478	-0.8478	-0.8478	-0.8478	-0.8478	-0.8478	-0.8478	-0.8478	-0.8478	-0.8478
YOR378W		0.061	0.061	0.061	0.061	0.061	0.061	0.061	0.061	0.061	0.061	0.061	0.061	0.061	0.061									-0.2062	-0.2062	-0.2062	-0.2062	-0.2062	-0.2062	-0.2062	-0.2062	-0.2062	-0.2062	-0.2062	-0.8366	-0.9067	-0.9067	-0.9067	-0.9067	-0.9067	-0.9067	-0.9067	-0.9067	-0.9067	-0.9067	-0.9067	-0.9067	-0.9067	-0.9067
YLR326W																												-0.8339	-0.8339	-0.8339	-0.8339	-0.8339	-0.8339	-0.8339	-0.8339	-0.8339	-0.8339	-0.8339	-0.8339	-0.8339	-0.8339	-0.8339	-0.8339					0.1377	0.1377
YOR178C	GAC1															-1.5973	-1.5973	-1.5973	-1.5973	-1.5973	-1.5973	-1.5973	-1.5973	-1.5973	-1.5973	-1.5973	-1.5973	-1.5973	-1.5973
YOR042W	CUE5	-0.8009	-0.8009	-0.8009	-0.8009			-0.7367	-0.7367	-0.7367	-0.7367	-0.7367	-0.7367	-0.7367	-0.7367	-0.7367	-0.7367	-0.7367	-0.7367	-0.7367	-0.7367	-0.7367	-0.7367	-0.7367																					-0.6071	-0.6071	-0.6071	-0.6071	-0.6071
YGR049W	SCM4	-0.3582	-0.3582	-0.3582	-0.3582	-0.3582	-0.3582	-0.3582	-0.3582	-0.3582	-0.3582	-0.3582	-0.3582	-0.3582	-0.3582	-0.3582	-0.3582													-0.7547	-0.7547	-0.7547	-0.7547	-0.7547	-0.7547	-0.7547	-0.7547	-0.7547	-0.7547	-0.7547
YPR015C		-0.1136	-0.1136	-0.1136	-0.1136	-0.1136	-0.1136	-0.1136	-0.1136	-0.1136																															-0.7166	-0.7166	-0.7166	-0.7166	-0.7166	-0.7166	-0.7166	-0.7166	-0.7166
YDR242W	AMD2																												-0.9432	-0.9432	-0.9432	-0.9432	-0.9432	-0.9432	-0.9432	-0.9432	-0.9432	-0.9432	-0.9432	-0.9432	-0.9432	-0.9432
YDR297W	SUR2	-0.8484													-1.6646	-1.6646	-1.6646	-1.6646	-1.6646	-1.6646	-1.6646	-1.6646	-1.6646	-1.6646	-1.6646	-1.6646	-1.6646	-1.6646	-1.6646
YMR271C	URA10									-0.4877	-0.4877	-0.4877	-0.4877	-0.4877	-0.4877	-0.4877	-0.4877	-0.4877	-0.4877	-0.4877	-0.4877	-0.4877	-0.4877	-0.4877
YHR026W	PPA1	-0.0024	-0.0024	-0.0024	-0.0784	-0.0784	-0.0784	-0.0784	-0.0784	-0.0784	-0.0784	-0.0784	-0.0784	-0.0784	-0.0784	-0.0784	-0.0784	-0.0784	-0.0784				-0.6018	-0.6018	-0.6018	-0.6018	-0.6018	-0.6018	-0.6018	-0.6018	-0.6018	-0.6018	-0.6018	-0.6018	-0.6018	-0.6018	-0.6018
YNL111C	CYB5	0.3199	0.3199	0.3199	0.3199	0.3199									-0.1182	-0.1182	-0.1182	-0.1182	-0.1182	-0.1182	-0.1182	-0.1182	-0.1182	-0.1182	-0.1182	-0.1182	-0.1182																			-0.2672	-0.2672	-0.2672	-0.2672
YDR223W	CRF1	-0.6737	-0.6737	-0.6737	-0.2389	-0.0525	-0.0525	-0.0525	-0.0525	-0.0525	-0.0525	-0.0525	-0.0525	-0.0525	-0.0525	-0.0525	-0.0525	-0.0525	-0.0525	-0.0525	-0.0525									-0.7036	-0.7036	-0.7036	-0.7036	-0.7036	-0.7036	-0.7036	-0.7036	-0.7036	-0.7036	-0.7036	-0.7036				-0.1736	-0.1736	-0.1736	-0.1736	-0.1736
YOL032W	OPI10	-0.53	-0.53	-0.53	-0.53	-0.53	-0.53	-0.53	-0.4907	-0.4592	-0.4592	-0.4592	-0.4592	-0.4592	-0.4592	-0.4592	-0.4592	-0.4592
YNL277W	MET2								-1.3455	-1.3455	-1.3455	-1.3455	-1.3455	-1.3455	-1.3455	-1.3455	-1.3455	-1.3455	-1.3455	-1.3455	-1.3455	-1.3455	-1.2342	-1.2342	-1.2342	-1.2342	-1.2342	-1.2342	-1.2342	-1.2342	-1.2342	-1.2342	-1.2342	-1.2342	-1.2342	-1.2342				-0.6213	-0.6213	-0.6213	-0.6213	-0.6213	-0.6213	-0.6213	-0.6213	-0.6213	-0.6213
YNR034W-A				-0.8601	-0.8601	-0.8601	-0.8601	-0.8601	-0.8601	-0.8601	-0.8601	-0.8601	-0.8601	-0.8601	-0.8601	-0.8601	-0.8601	-0.8601	-0.8601		-0.8127	-0.8127	-0.8127	-0.8127	-0.8127	-0.8127	-0.8127	-0.8127	-0.8127	-0.8127	-0.8127	-0.8127	-0.8127	-0.5539	-0.5539	-0.5539	-0.5539	-0.5539	-0.5539	-0.5539	-0.5539	-0.5539	-0.5539	-0.5539	-0.5539	-0.5539	-0.5539	-0.5539	-0.5539
YOR049C	RSB1										-1.1697	-1.1697	-1.1697	-1.1697	-1.1697	-1.1697	-1.1697	-1.1697	-1.1697	-1.1697	-1.1697	-1.1697	-1.1697	-1.1697	-1.1697	-1.1697	-0.4472	-0.4472	-0.4472	-0.4472	-0.4472	-0.4472	-0.4472	-0.4472	-0.4472	-0.4472	-0.4472	-0.4472	-0.9891	-0.9891	-0.9891	-0.9891	-0.9891	-0.9891	-0.9891	-0.9891	-0.9891	-0.9891
YKL141W	SDH3	0.1157	0.1157	-0.3482	-0.3997	-0.3997	-0.3997	-0.3997	-0.3997	-0.3997	-0.3997	-0.3997	-0.3997	-0.3997																					0.0139	0.0139	0.0139	0.0139	0.0139	0.0139	0.0139	0.0139	0.0139	0.0139	0.0139			-0.2453	-0.2453
YHR183W	GND1	-1.4241	-1.4241	-1.4241	-1.4241	-1.2039	-1.2039	-1.2039	-1.2039	-1.2039	-1.2039	-1.2039	-1.2039	-1.2039	-1.2039	-1.2039	-1.2039	-1.2039	-1.2039	-1.2039	-1.2039	-1.2039	-1.2186	-1.2186	-1.2186	-1.2186	-1.2186	-1.2186	-1.2186	-1.2186	-1.2186	-1.2186	-1.2186	-1.2186	-1.2186	-1.2186	-1.2186	-1.2186	-1.2186	-1.2186	-1.6018	-1.6018	-1.6018	-1.6018	-1.6018	-1.6018	-1.6018	-1.6018	-1.6018
YDR275W	BSC2	-0.7926	-0.5122	-0.3921	-0.3921	-0.3921	-0.3921	-0.3921	-0.3921	-0.3921	-0.3921	-0.3921	-0.3921	-0.3921	-0.3921	-0.3921	-0.3921	-0.3921	-0.3921	-0.3921	-0.7719	-0.9998	-0.9998	-0.9998	-0.9998	-0.9998	-0.9998	-0.9998	-0.9998	-0.9998	-0.9998	-0.9998	-0.9998	-0.9998	-0.9998	-0.9998	-0.9998
YMR241W	YHM2	-0.3217	-0.3217	-0.3217	-0.3217	-0.3217	-0.3217	-0.3217																												-0.6587	-0.6587	-0.6587	-0.6587	-0.6587	-0.6587	-0.6587	-0.6587	-0.6587	-0.6587	-0.6587	-0.6587	-0.6587	-0.6587
YIL061C	SNP1																															0.044	0.044	0.044	0.044	0.044	0.044	0.044	0.044	0.044	0.044	0.044	0.044	0.044	0.044				0.479
YER076C		-0.3217	-0.3217	-0.3217	-0.3217	-0.3217	-0.3217	-0.0397	0.2422	0.2422	0.2422	0.2422	0.2422	0.2422	0.2422	0.2422	0.2422	0.2422				-0.028	-0.028	-0.028	-0.028	-0.028	-0.028	-0.028	-0.028	-0.028	-0.028	-0.028	-0.028	-0.028	-0.028	-0.028	-0.028	-0.028
YEL020W-A	TIM9
YGR181W	TIM13				-0.2513	-0.2513	-0.2513	-0.2513	-0.2513	-0.2513	-0.2513	-0.2513	-0.2513	-0.2513	-0.2513	-0.2513	-0.2513	-0.2513	-0.2513	-0.2513	-0.203	-0.203	-0.203	-0.203	-0.203	-0.203	-0.203	-0.203	-0.203	-0.203	-0.203	-0.203			-0.6154	-0.6154	-0.6154	-0.6154	-0.6154	-0.6154	-0.6154	-0.6154	-0.6154	-0.6154
YDR472W	TRS31	-0.8623	-0.8623	-0.8623	-0.8623
YML121W	GTR1						-1.2008	-1.2008	-1.2008	-1.2008	-1.2008	-1.2008	-1.2008	-1.2008	-1.2008	-1.2008	-1.2008	-1.2008
YER028C	MIG3					-0.4472	-0.4472	-0.4472	-0.4472	-0.4472	-0.4472	-0.4472	-0.4472	-0.4472	-0.4472	-0.4472	-0.4472	-0.4472
YOR274W	MOD5	-0.5281	-0.5281	-0.5281	-0.5281	-0.5281	-0.5281	-0.5281	-0.4327	-0.4327	-0.4327	-0.4327	-0.4327	-0.4327	-0.4327	-0.4327	-0.4327	-0.4327	-0.4327	-0.4327												-1.5143	-1.5143	-1.5143	-1.5143	-1.5143	-1.5143	-1.5143	-1.5143	-1.5143	-1.5143	-1.5143	-1.5143	-1.5143	-1.5143	-1.5143	-1.5143	-1.5143
YJL153C	INO1	-0.5441	-0.5441	-0.5441	-0.5441	-0.5441	-0.5441	-0.8947	-0.9336	-0.9336	-0.9336	-0.9336	-0.9336	-0.9336	-0.9336	-0.9336	-0.9336	-0.9336	-0.9336	-0.9336	-0.9336						-0.3997	-0.3997	-0.3997	-0.3997	-0.3997	-0.3997	-0.3997	-0.3997	-0.3997	-0.3997	-0.3997	-0.3997	-0.3997	-0.1566	-0.1566	-0.1566	-0.1566	-0.1566	-0.1566	-0.1566	-0.1566	-0.1566	-0.1566
YJR105W	ADO1									-1.29	-1.29	-1.29	-1.29	-1.29	-1.29	-1.29	-1.29	-1.29	-1.29	-1.29	-1.29	-1.29	-1.29	-1.29	-1.29	-1.29
YPL233W	NSL1	-0.0587	-0.0587	-0.0587							-0.3768	-0.3768	-0.3768	-0.3768	-0.3768	-0.3768	-0.3768	-0.3768	-0.3768	-0.3768	-0.3768	-0.3768	-0.3768	-0.3768	-0.3768	-0.3768	-0.3768	-0.3768	-0.3768																			-0.2811	-0.2811
YIL121W	QDR2	-1.2692	-1.2692	-1.2692	-1.2692	-1.2692	-1.2692	-1.2692	-1.2692	-1.2692																																							-0.3408
YLR074C	BUD20	-0.7578	-0.7578	-0.7578	-0.7578	-0.7578	-0.7578	-0.7578	-0.7578	-0.7578	-0.7578	-0.7578																																					-0.7222
YIR018W	YAP5			-1.1182	-1.1182	-1.1182	-1.1182	-1.1182	-1.1182	-1.1182	-1.1182	-1.1182	-1.1182	-1.1182	-1.1182	-1.1182	-1.1182	-1.1182	-1.1182																												-0.2477	-0.2477	-0.2477
YBL043W	ECM13																							-1.1697	-1.1697	-1.1697	-1.1697	-1.1697	-1.1697	-1.1697	-1.1697	-1.1697	-1.1697	-1.1697	-1.1697	-1.1697	-1.1697	-1.1697	-1.1697	-1.1697	-1.1697		-0.4529	-0.4529	-0.4529	-0.4529	-0.4529	-0.4529	-0.4529
YDR070C	FMP16	-0.3534	-0.3534	-0.3534	-0.3534	-0.3534	-0.3534	-0.3534	-0.3534	-0.3534	-0.3534												-0.2711	-0.2711	-0.2711	-0.2711	-0.2711	-0.2711	-0.2711	-0.2711	-0.2711	-0.2711		0.1164	0.1164	0.1164	0.1164	0.1164	0.1164	0.1164	0.1164	0.1164	0.1164	0.0933	0.0933	0.0933	0.0933	0.0933	0.0933
YIL050W	PCL7	-0.9738	-0.9738	-0.9738	-0.9738	-0.9738	-0.9738	-0.9738	-0.9738	-0.9911	-0.9931	-0.9931	-0.9931	-0.9931	-0.9931	-0.9931	-0.9931	-0.9931	-0.9931	-0.9931	-0.9931	-0.9931	-0.9931	-0.9931	-0.9931	-0.9931
YER067W		-0.3714	-0.3714	-0.3714	-0.3714	-0.3714	-0.3714	-0.3714	-0.3714	-0.3714	-0.3714	-0.3714	-0.3714	-0.3714	-0.3714	-0.3714	-0.3714	-0.3714	-0.1934	-0.1934	-0.1934	-0.1934	-0.1934	-0.1934	-0.1934	-0.1934	-0.1934	-0.1934	-0.1934	-0.1934	-0.1934	-0.1934	-0.1934	-0.1934													0.0538	0.0538	0.0538
YDR119W-A		-0.7367	-0.7367	-0.7367	-0.7367	-0.7367	-0.7367	-0.7367																-1.1139	-1.1139	-1.1139	-1.1139	-1.1139	-1.1139	-1.1139	-1.1139	-1.1139	-1.1139	-1.1139	-1.1139	-1.1139	-1.1139	-1.1139	-1.1139	-1.1139
YLR307W	CDA1	-0.2191	-0.2191	-0.2191	-0.2191	-0.2191	-0.2191	-0.2191	-0.2191															-0.3592	-0.3592	-0.3592	-0.3592	-0.3592	-0.3592	-0.3592	-0.3592	-0.3592	-0.3592	-0.3592	-0.3592	-0.3592							-0.2628	-0.2628	-0.2628	-0.2628	-0.2628	-0.2628	-0.2628
YNL142W	MEP2							-0.6638	-0.6638	-0.6638	-0.6638	-0.6638	-0.6638	-0.6638	-0.6638	-0.6638	-0.6638	-0.6638	-0.6638	-0.6638	-0.6638	-0.6638	-0.6288	-0.5061	-0.5061	-0.5061	-0.5061	-0.5061	-0.5061	-0.5061	-0.5061	-0.5061	-0.5061	-0.5061	-0.5061										-0.7771	-0.7771	-0.7771	-0.7771	-0.7771
YDR418W	RPL12B
YPR120C	CLB5												-0.7222	-0.7222	-0.7222	-0.7222	-0.7222	-0.7222	-0.7222	-0.7222	-0.7222	-0.7222	-0.7222	-0.7222	-0.7222	-0.7222								-0.1087	-0.1087	-0.1087	-0.1087	-0.1087	-0.1087	-0.1087	-0.1087	-0.1087	-0.1087	-0.1087	-0.1087	-0.1087	-0.1087	-0.1087	-0.1087
YER004W	FMP52				0.2197	0.2197	0.2197	0.2197	0.2197	0.2197	0.2197	0.2197	0.2197	0.2197	0.2197	0.2197	0.2197							-0.6071	-0.6071	-0.6071	-0.6071	-0.6071	-0.6071	-0.6071	-0.6071	-0.6071	-0.6071	-0.6071	-0.6071					-0.5707	-0.5707	-0.5707	-0.5707	-0.5707	-0.5707	-0.5707	-0.5707	-0.5707	-0.5707
YGR079W		-0.4812	-0.4812	-0.4812	-0.4812	-0.4812	-0.4812	-0.4812	-0.4812																																		-0.2651	-0.2651	-0.2651	-0.2651	-0.2651	-0.2651	-0.2651
YOL108C	INO4	-0.159	-0.159	-0.159	-0.159	-0.159	-0.1475	-0.1399	-0.1399	-0.1399	-0.1399	-0.1399	-0.1399	-0.1399	-0.1399	-0.1399	-0.1399	-0.1399	-0.1399	-0.1399	-0.1399	-0.1399	-0.1399	-0.1399	0.4153	0.4153	0.4153	0.4153	0.4153	0.4153	0.4153	0.4153	0.4153	0.4153											0.6142	0.6142	0.6142	0.6142	0.6142
YLR043C	TRX1	-0.6843	-0.6843	-0.9099	-1.0791	-1.0791	-1.0791	-1.0791	-1.0791	-1.0791	-1.0791	-1.0791	-1.0791	-1.0791	-1.0791	-1.0791	-1.0791	-1.0791	-1.0791	-1.0791	-1.0791									-0.5902	-0.5902	-0.5902	-0.5902	-0.5902	-0.5902	-0.5902	-0.5902	-0.5902	-0.5902	-0.5902	-0.5902	-0.5902							-0.6543
YGR197C	SNG1	-0.0887	-0.0887	-0.0887	-0.0887	-0.0887	-0.0887	-0.0887	-0.0887	-0.0887	-0.0887	-0.0887	-0.0887	-0.3239	-0.3501	-0.3501	-0.3501	-0.3501	-0.3501	-0.3501	-0.3501	-0.3501	-0.3501	-0.3501	-0.3501	-0.3501	-0.3501	-0.3501
YOR107W	RGS2																																									-1.7547	-1.7547	-1.7547	-1.7547	-1.7547	-1.7547	-1.7547	-1.7547
YGR202C	PCT1	-1.4482	-1.4482	-1.4482	-1.4482	-1.4482	-1.4482	-1.4482	-1.4482	-1.4482
YPR156C	TPO3		-1.2477	-1.2477	-1.2477	-1.2477	-1.2477	-1.2477	-1.2477	-1.2477	-1.2477	-1.2477	-1.2477	-1.2477	-1.2477	-1.2477																		-0.7367	-0.7367	-0.7367	-0.7367	-0.7367	-0.7367	-0.7367	-0.7367	-0.7367	-0.7367	-0.7367	-0.7367	-0.7367	-0.7367	-0.7367
YJL001W	PRE3	0.2972	0.2972	0.2972	0.2972	0.2972	0.2972	0.2972	0.2972	0.2972	0.2972	0.2972	0.2972											-0.7851	-0.7851	-0.7851	-0.7851	-0.7851	-0.7851	-0.7851	-0.7851	-0.7851	-0.7851	-0.7851	-0.7851	-0.7851	-0.7851	-0.7851										-0.6194	-0.6194
YNR015W	SMM1				-0.2342	-0.2342	-0.2342	-0.2342	-0.2342	-0.2342	-0.2342	-0.2342	-0.2342	-0.2342	-0.2342	-0.2342	-0.2342	-0.2342	-0.2342	-0.2342	-0.2342			-1.1773	-1.1773	-1.1773	-1.1773	-1.1773	-1.1773	-1.1773	-1.1773	-1.1773	-1.1773	-1.1773					-0.0379	-0.0379	-0.0379	-0.0379	-0.0379	-0.0379	-0.0379	-0.0379	-0.0379	-0.0379	-0.0379
YGR068C	ART5									-0.2039	-0.2039	-0.2039	-0.2039	-0.2039	-0.2039	-0.2039	-0.2039	-0.2039	-0.2478	-0.6436	-0.6436	-0.6436	-0.6436	-0.6436	-0.6436	-0.6436	-0.6436	-0.6436	-0.6436	-0.6436	-0.6436	-0.6436	-0.6436	-0.6436														-0.2486	-0.2486
YGR032W	GSC2															-0.8327	-0.8327	-0.8327	-0.8327	-0.8327	-0.8327	-0.8327	-0.8327	-0.8327	-0.8327	-0.8327	-0.8327	-0.8327	-0.8327	-0.8327	-0.8327	-0.8327	-1.1388	-1.1388	-1.1388	-1.1388	-1.1388	-1.1388	-1.1388	-1.1388	-1.1388	-1.1388
YFR017C		-0.5112	-0.5112																															-0.0516	-0.0516	-0.0516	-0.0516	-0.0516	-0.0516	-0.0516	-0.0516	-0.0516	-0.0516	-0.0516		0.134	0.134	0.134	0.134
YFL030W	AGX1		-0.0295	-0.0295	-0.0295	-0.0295	-0.0295	-0.0295	-0.0295	-0.0295	-0.0295	-0.0295	-0.0295	-0.0295		-0.5086	-0.5086	-0.5086	-0.5086	-0.5086	-0.5086	-0.5086	-0.5086	-0.5086	-0.5086	-0.5086	-0.5086				-0.6656	-0.6656	-0.6656	-0.6656	-0.6656	-0.6656	-0.6656	-0.6656	-0.6656	-0.6656	-0.6656	-0.6656	-0.6656	-0.6656	-0.369	-0.369	-0.369	-0.369	-0.369
YAL054C	ACS1																															-0.6865	-0.6865	-0.6865	-0.6865	-0.6865	-0.6865	-0.6865	-0.6865	-0.6865	-0.6865	-0.6865	-0.6865	-0.6865	-0.6865	-0.6865	-0.6865	-0.6865	-0.6865
YLL038C	ENT4	-0.5364	-0.5364	-0.5364	-0.5364	-0.3432	-0.3217	-0.3217	-0.3217	-0.3217	-0.3217	-0.3217	-0.3217	-0.3217	-0.3217	-0.3217	-0.3217			-0.0853	-0.0853	-0.0853	-0.0853	-0.0853	-0.0853	-0.0853	-0.0853	-0.0853	-0.0853	-0.0853	-0.0853	-0.0853	-0.0853	-0.0853	-0.0853	-0.0853	-0.0853
YBR241C				-0.5717	-0.5717	-0.5717	-0.5717	-0.5717	-0.5717	-0.5717	-0.5717	-0.5717	-0.5717	-0.5717	-0.5717	-0.5717																-0.7289	-0.7289	-0.7289	-0.7289	-0.7289	-0.7289	-0.7289	-0.7289	-0.7289	-0.7289	-0.7289	-0.7289	-0.7289	-0.7289	-0.7289	-0.7289
YPL079W	RPL21B										-1.2759	-1.2759	-1.2759	-1.2759	-1.2759	-1.2759	-1.2759	-1.2759	-1.2759	-1.2759	-1.2759	-1.2759	-1.2759	-1.2759																							-0.3217	-0.3217	-0.3217
YDR408C	ADE8	0.3199	0.3199	0.3199	0.3199	0.3199	0.2258	0.2258	0.2258	0.2258	0.2258	0.2258	0.2258	0.2258	0.2258	0.2258																															-0.061	-0.061	-0.061
YKL055C	OAR1	-0.1049	-0.1049	-0.1049		-0.671	-0.671	-0.671	-0.671	-0.671	-0.671	-0.671	-0.671	-0.671	-0.671																							-0.7222	-0.7222	-0.7222	-0.7222	-0.7222	-0.7222	-0.7222	-0.7222	-0.7222	-0.7222	-0.7222	-0.7222
YNL283C	WSC2	-0.7491	-0.7491	-0.7491	-0.7491										-1.5396	-1.5396	-1.5396	-1.5396	-1.5396	-1.5396	-1.5396	-1.5396	-1.5396	-1.5396	-1.5396	-1.5396	-1.5396	-1.5396	-1.5396	-1.5396	-1.5396	-1.5396
YMR206W																									-0.6826	-0.6826	-0.6826	-0.6826	-0.6826	-0.6826	-0.6826	-0.6826	-0.6826	-0.6826	-0.6826	-0.6826	-0.6826	-0.6826	-0.6826	-0.6826			-0.6587	-0.6587	-0.6587	-0.6587	-0.6587	-0.6587	-0.6587
YGL054C	ERV14
YBL071W-A	KTI11
YJL122W	ALB1	0.3873	0.3873	0.3873	0.3873	0.3873	0.3873	0.3873	0.3873	0.3873	0.3873	0.3873	0.3873	0.3873	0.3873	0.3873	0.3873	0.3751	0.3716	0.3716	0.3716	0.3716	0.3716	0.3716	0.3716	0.3716	0.3716	0.3716	0.3716					1.0933	1.0933	1.0933	1.0933	1.0933	1.0933	1.0933	1.0933	1.0933	1.0933	1.0933	1.0933	1.0933	1.0933	-0.0853	-0.0853
YJR014W	TMA22	-0.0958	-0.4342	-0.4342	-0.4342	-0.4342	-0.4342	-0.4342	-0.4342	-0.4342	-0.4342	-0.4342	-0.4342	-0.4342	-0.4342	-0.4342	-0.4342	-0.4342	-0.4342	-0.4342		-0.5323	-0.5323	-0.5323	-0.5323	-0.5323	-0.5323	-0.5323	-0.5323	-0.5323	-0.5323	-0.5323	-0.5323	-0.5323	-0.5323	-0.5323
YGL050W	TYW3																																																-0.7367
YNL251C	NRD1	-0.2978	-0.2978	-0.2978										-0.3217	-0.3217	-0.3217	-0.3217	-0.3217	-0.3217	-0.3217	-0.3217	-0.3217	-0.3217	-0.3217	-0.3217
YDR186C																																																-1.4128	-1.4128
YJL210W	PEX2	-0.7367	-0.7367	-0.7367	-0.7367	-0.7367	-0.7367	-0.7367	-0.7367			-0.3717	-0.3717	-0.3717	-0.3717	-0.3717	-0.3717	-0.3717	-0.3717	-0.3717	-0.3717	-0.3717	-0.3717	-0.3717	-0.3296	-0.1612	-0.1612	-0.1612	-0.1612	-0.1612	-0.1612	-0.1612	-0.1612	-0.1612	-0.1612			-0.8719	-0.8719	-0.8719	-0.8719	-0.8719	-0.8719	-0.8719	-0.8719	-0.8719	-0.8719	-0.8719	-0.8719
YLR364W	GRX8	-0.0993	-0.0993	-0.0993	-0.0993	-0.0993				-0.0993	-0.0993	-0.0993	-0.0993	-0.0993	-0.0993	-0.0993	-0.0993	-0.0993	-0.0993	-0.0993	-0.0993	-0.0993																			-0.8593	-0.8593	-0.8593	-0.8593	-0.8593	-0.8593	-0.8593	-0.8593	-0.8593
YGR138C	TPO2																									-1.129	-1.129	-1.129	-1.129	-1.129	-1.129	-1.129	-1.129	-1.129	-1.129	-1.129	-1.129	-1.129	-1.129	-1.129	-1.129	-1.129
YLR058C	SHM2	-0.6967	-0.6967	-0.6967	-0.6967	-0.6967	-0.6967	-0.7523	-0.7523	-0.7523	-0.7523	-0.7523	-0.7523	-0.7523	-0.7523	-0.7523	-0.7523	-0.7523	-0.7523	-0.7523	-0.7523	-0.7523																									-0.9891	-0.9891	-0.9891
YLR257W																																		-0.4179	-0.4179	-0.4179	-0.4179	-0.4179	-0.4179	-0.4179	-0.4179	-0.4179	-0.4179	-0.4179	-0.4179	-0.4179	-0.4179	-0.4179	-0.4179
YPR010C-A			-0.0168	-0.0168	-0.0168	-0.0168	-0.0168	-0.0168	-0.0168	-0.0168	-0.0168	-0.0168	-0.0168	-0.0168	-0.0168	-0.0168	-0.0168	-0.1475	-0.2128	-0.2128	-0.2128	-0.2128	-0.2128	-0.2128	-0.2128	-0.2128	-0.2128	-0.2128	-0.2128	-0.2128	-0.2128	-0.2128	-0.2128	-0.2128	-0.2128		-0.6071	-0.6071	-0.6071	-0.6071	-0.6071	-0.6071	-0.6071	-0.6071	-0.6071	-0.6071	-0.6071	-0.6071	-0.6071
YLR363W-A		0.0002	0.0002	0.0002	0.0002	0.0002	0.0002	0.0002	0.0002	0.0002	0.0002	0.0002	0.0002	0.0002	0.0002	0.0002	0.0002	0.0002	-0.1642	-0.1642	-0.1642	-0.1642	-0.1642	-0.1642	-0.1642	-0.1642	-0.1642	-0.1642	-0.1642	-0.1642
YER012W	PRE1	-0.4945	-0.4945	-0.4945	-0.4945	-0.4945	-0.4945	-0.4945	-0.4945	-0.4945	-0.4945	-0.4945	-0.4945	-0.4945	-0.4945							-1.0587	-1.0587	-1.0587	-1.0587	-1.0587	-1.0587	-1.0587	-1.0587	-1.0587	-1.0587	-1.0587	-1.0587	-1.0587	-1.0587	-1.0587	-1.0587	0.0653	0.0653	0.0653	0.0653	0.0653	0.0653	0.0653	0.0653	0.0653	0.0653	0.3971	0.7289
YEL040W	UTR2	-1.028	-1.028	-1.028	-1.028	-1.028	-1.028	-1.028	-1.028	-1.028	-1.028	-1.028	-1.028	-1.028
YEL036C	ANP1																											-1.1697	-1.1697	-1.1697	-1.1697	-1.1697	-1.1697	-1.1697	-1.1697	-1.1697	-1.1697	-1.1697	-1.1697	-1.1697	-1.1697	-1.1697	-1.1697
YKL187C		-0.4719	-0.4719	-0.4719	-0.4719	-0.4719									-0.7724	-0.7724	-0.7724	-0.7724	-0.7724	-0.7724	-0.7724	-0.7724	-0.7724	-0.7724	-0.7724	-0.7724	-0.7724	-0.7724	-0.7724	-0.7724	-0.7724	-0.7724	-0.3103	0.4597	0.4597	0.4597	0.4597	0.4597	0.4597	0.4597	0.4597	0.4597	0.4597						-0.0784
YDR481C	PHO8	-0.8441	-0.8441	-0.8441	-0.8441	-0.7097	-0.6761	-0.6761	-0.6761	-0.6761	-0.6761	-0.6761	-0.6761	-0.6761	-0.6761	-0.6761	-0.6761			-0.7719	-0.7719	-0.7719	-0.7719	-0.7719	-0.7719	-0.7719	-0.7719	-0.7719	-0.7719	-0.7719	-0.7719	-0.7719	-0.7719	-0.7719	-0.7719	-0.7719	-0.7719	-0.7719											-0.3406
YGL037C	PNC1
YHR011W	DIA4	0.0797	0.0797	0.0797	0.0797	0.0797	0.0797	0.0797	0.0797	0.0797	0.0797	0.0797	0.0797	0.0797				-0.1327	-0.1327	-0.1327	-0.1327	-0.1327	-0.1327	-0.1327	-0.1327	-0.1327	-0.1327	-0.1327																-0.7578	-0.7578	-0.7578	-0.7578	-0.7578	-0.7578
YKL109W	HAP4
YPL222W	FMP40	-0.3944	-0.3944			-0.9266	-0.9266	-0.9266	-0.9266	-0.9266	-0.9266	-0.9266	-0.9266	-0.9266	-0.9266	-0.9266	-0.9266	-0.9266	-0.9266	-0.9266	-0.9266	-0.8681	-0.4592	-0.4592	-0.4592	-0.4592	-0.4592	-0.4592	-0.4592	-0.4592	-0.4592	-0.4592	-0.4592	-0.4592	-0.4592	-0.4592											-0.4685	-0.4685	-0.4685
YOL135C	MED7	-0.0354	-0.0354	-0.0354	-0.0354	-0.0354	-0.0354	-0.0354	-0.0354	-0.0354								-0.3217	-0.3217	-0.3217	-0.3217	-0.3217	-0.3217	-0.3217	-0.3217	-0.3217	-0.3217	-0.3217	-0.3217	-0.3217	-0.3217	-0.3217	-0.3217	-0.3217	-0.3217	-0.3217
YBR106W	PHO88	-0.129	-0.129	-0.129
YDL125C	HNT1	-0.5696	-0.5696	-0.5696			-1.4042	-1.4042	-1.4042	-1.4042	-1.4042	-1.4042	-1.4042	-1.4042	-1.4042	-1.4042	-1.4042		-0.8836	-0.8836	-0.8836	-0.8836	-0.8836	-0.8836	-0.8836	-0.8836	-0.8836	-0.8836	-0.8836	-0.8836	-0.8836	-0.8836				-1.3775	-1.3775	-1.3775	-1.3775	-1.3775	-1.3775	-1.3775	-1.3775	-1.3775	-1.3775	-1.3775	-1.3775	-1.3775	-1.3775
YOR028C	CIN5	-0.4592	-0.4592	-0.4592	-0.4592	-0.4592	-0.4592	-0.4592	-0.4592	-0.4592	-0.4592																																				-0.6358	-0.6358	-0.6358
YDR273W	DON1		0.0193	0.0193	0.0193	0.0193	0.0193	0.0193	0.0193	0.0193	0.0193	0.0193	0.0193	0.0193	0.0193	0.0193	0.0193	0.0193	0.0193				-0.2286	-0.2286	-0.2286	-0.2286	-0.2286	-0.2286	-0.2286	-0.2286	-0.2286	-0.2286	-0.2286	-0.2286	-0.2286	-0.2286	-0.2286	-0.2286
YNL202W	SPS19	-0.856	-0.856	-0.856	-0.856	-0.856	-0.856	-0.856	-0.856	-0.856	-0.3332	-0.2286	-0.2286	-0.2286	-0.2286	-0.2286	-0.2286	-0.2286	-0.2286	-0.2286	-0.2286	-0.2286							0.0368	0.0368	0.0368	0.0368	0.0368	0.0368	0.0368	0.0368	0.0368	0.0368	0.0368
YJR005C-A		0.3341	0.3341	0.3341	0.3341	0.3341	0.3341	0.3341	0.3341																	-0.1962	-0.1962	-0.1962	-0.1962	-0.1962	-0.1962	-0.1962	-0.1962	-0.1962	-0.1962	-0.1962	-0.1962	-0.1962	-0.3884	-0.3884	-0.3884	-0.3884	-0.3884	-0.3884	-0.3884	-0.3884	-0.3884	-0.3884	-0.3884
YLR205C	HMX1	0.0396	0.0396	0.0396	0.0396	0.0396	0.0396	0.0396	0.0396	0.0396	0.0396	0.0396	0.0396	0.0396	0.0396	0.0396	0.0396	0.0396		-0.1815	-0.1815	-0.1815	-0.1815	-0.1815	-0.1815	-0.1815	-0.1815	-0.1815	-0.1815	-0.1815	-0.1815	-0.1815	-0.0807	-0.0807	-0.0807	-0.0807	-0.0807	-0.0807	-0.0807	-0.0807	-0.0807	-0.0807	-0.0807	-0.0807	-0.0807	-0.0807	-0.5342	-0.5342	-0.5342
YGR027C	RPS25A																		-1.4042	-1.4042	-1.4042	-1.4042	-1.4042	-1.4042	-1.4042	-1.4042	-1.4042	-1.4042
YHR071W	PCL5																																												-1.129	-1.129	-1.129	-1.129	-1.129
YLR327C	TMA10	-0.8453	-0.8453	-0.8453	-0.8453	-0.8453	-0.8453	-0.8453	-0.8453	-0.8453	-0.8453	-0.8453																					-0.5252	-0.5252	-0.5252	-0.5252	-0.5252	-0.5252	-0.5252	-0.5252	-0.5252	-0.5252	-0.5252
YDL087C	LUC7	0.0212	0.0212	0.0212	0.0212	-0.4576	-0.4576	-0.4576	-0.4576	-0.4576	-0.4576	-0.4576	-0.4576	-0.4576	-0.4576	-0.4576	-0.4576	-0.4576			-0.5216	-0.5216	-0.5216	-0.5216	-0.5216	-0.5216	-0.5216	-0.5216	-0.5216	-0.5216	-0.5216	-0.5216	-0.5216	-0.5216	-0.5216	-0.5216	-0.5216	-0.5216	-0.5216										-0.4115
YPR062W	FCY1		-0.2513	-0.2513	-0.2513	-0.2513	-0.2513	-0.2513	-0.2513	-0.2513	-0.2513	-0.2513	-0.2513	-0.2513	-0.2513	-0.2513	-0.2513	-0.8993	-1.1152	-1.1152	-1.1152	-1.1152	-1.1152	-1.1152	-1.1152	-1.1152	-1.1152	-1.1152	-1.1152	-1.1152	0.1929	0.1929	0.1929	0.1929	0.1929	0.1929	0.1929	0.1929	0.1929	0.1929	0.1929	0.1929	0.1929
YBL039W-B		0.3959	0.3959	0.3959	0.3959	0.3959	0.3959	0.3959	0.3959	0.3959	0.3959	0.3959	0.3959	0.3959	0.2536	-0.0784	-0.0784	-0.0784	-0.0784	-0.0784	-0.0784	-0.0784	-0.0784	-0.0784	-0.0784	0.0933	0.0933	0.0933	0.0933	0.0933	0.0933	0.0933	0.0933	0.0933	0.0933	0.0933	0.0933			-0.6792	-0.6792	-0.6792	-0.6792	-0.6792	-0.6792	-0.6792	-0.6792	-0.6792	-0.6792
YBR022W	POA1					-0.0322	-0.0322	-0.0322	-0.0322	-0.0322	-0.0322	-0.0322	-0.0322	-0.0322	-0.0322	-0.0322	-0.0322	-0.0322	-0.0322	-0.0322	-0.0322	-0.0322						-0.9738	-0.9738	-0.9738	-0.9738	-0.9738	-0.9738	-0.9738	-0.9738	-0.9738	-0.9738	-0.9738										-0.9364	-0.9364
YDR236C	FMN1		0.0212	0.0212	0.0212	0.0212	0.0212	0.0212	0.0212	0.0212	0.0212	0.0212	0.0212	0.0212	0.4246	0.4246	0.4246	0.4246	0.4246	0.4246	0.4246	0.4246	0.4246	0.4246	0.4246	0.3162	0.1536	0.1536	0.1536	0.1536	0.1536	0.1536	0.1536	0.1536	0.1536	0.1536	0.1536	0.1536	0.1536	0.1536							-0.29	-0.29	-0.29
YPR114W		-0.121	-0.121	-0.121	-0.121	-0.121	-0.121	-0.121	-0.121	-0.121	-0.121	-0.121	-0.121	-0.121	-0.121	-0.121	-0.121	-0.121	-0.121							-0.9998	-0.9998	-0.9998	-0.9998	-0.9998	-0.9998	-0.9998	-0.9998	-0.9998	-0.9998	-0.9998	-0.9998									0.2787	0.2787	0.2787	0.2787
YLR004C	THI73	0.2633	0.2633	0.2633	0.2633	0.2633	0.2633	0.2633	0.2633	0.2633	0.3205	0.4539	0.4539	0.4539	0.4539	0.4539	0.4539	0.4539	0.4539	0.4539	0.4539	-0.1328	-0.2795	-0.2795	-0.2795	-0.2795	-0.2795	-0.2795	-0.2795	-0.2795	-0.2795	-0.2795	-0.2795	-0.2795	-0.2795											-0.5367	-0.5367	-0.5367	-0.5367
YNL282W	POP3	-0.9998	-0.9998	-0.9998																			-1.5396	-1.5396	-1.5396	-1.5396	-1.5396	-1.5396	-1.5396	-1.5396	-1.5396	-1.5396	-1.5396	-1.5396	-1.5396	-1.5396	-1.5396	-1.5396	-1.5396	-1.5396
YOR236W	DFR1
YOR173W	DCS2	-1.0949	-1.0949	-1.0949	-1.0949	-1.0949	-1.0949	-1.0949	-1.0949	-1.0949	-1.0949	-1.0949	-1.0949	-1.0949	-1.0949	-1.0949					-0.9591	-0.9591	-0.9591	-0.9591	-0.9591	-0.9591	-0.9591	-0.9591	-0.9591	-0.9591	-0.9591	-0.9591	-0.9591	-0.9591	-0.9591	-0.9591	-0.9591	-0.9591	-0.8201	-0.7505	-0.7505	-0.7505	-0.7505	-0.7505	-0.7505	-0.7505	-0.7505	-0.7505	-0.7505
YFR008W	FAR7								0.5714	0.5714	0.5714	0.5714	0.5714	0.5714	0.5714	0.5714	0.5714	0.5714	0.5714	0.5072	0.2506	0.2506	0.2506	0.2506	0.2506	0.2506	0.2506	0.2506	0.2506	0.2506	0.2506	0.2506	-0.4822	-0.4822	-0.4822	-0.4822	-0.4822	-0.4822	-0.4822	-0.4822	-0.4822	-0.4822	-0.4822	-0.4822	-0.4822	-0.4822	-0.4822	-0.4822	-0.121
YNL070W	TOM7	-0.3363	-0.3363	-0.3363	-0.3363	-0.3363	-0.3363	-0.3363	-0.3363	-0.3363	-0.3363	-0.3363	-0.3363	-0.3363	-0.3363	0.6898	0.8038	0.8038	0.8038	0.8038	0.8038	0.8038	0.8038	0.8038	0.8038	0.8038
YJL189W	RPL39
YPL048W	CAM1	-1.0993	-1.0993	-1.0993	-1.0993	-1.0993	-1.0993																	-0.6112	-0.6112	-0.6112	-0.6112	-0.6112	-0.6112	-0.6112	-0.6112	-0.6112	-0.6112	-0.6112												-1.0587	-1.0587	-1.0587	-1.0587
YFL039C	ACT1	-0.5364	-0.5364
YLR431C	ATG23	-1.1421	-1.1421	-1.1421	-1.1421																																												-0.7888
YDR066C	RTR2	0.2633	0.2633	0.2633	0.2633	0.2633	0.2633	0.2633	0.2633	0.2633														-0.3217	-0.3217	-0.3217	-0.3217	-0.3217	-0.3217	-0.3217	-0.3217	-0.3217	-0.3217	-0.3217	-0.3217	-0.3217	-0.3217	-0.3217		-0.3217	-0.3217	-0.3217	-0.3217	-0.3217	-0.3217	-0.3217	-0.3217	-0.3217	-0.3217
YJL133W	MRS3	-0.593	-0.593	-0.8192	-0.8192	-0.8192	-0.8192	-0.8192	-0.8192	-0.8192	-0.8192	-0.8192	-0.8192	-0.8192	-0.8192	-0.8192	-0.8192																															-0.8242	-0.8242
YLR406C	RPL31B
YGL126W	SCS3	-0.0842	-0.0842	-0.0842	-0.0842	-0.0842	-0.0842							0.2338	0.2338	0.2338	0.2338	0.2338	0.2338	0.2338	0.2338	0.2338	0.2338	-0.0622	-0.5061	-0.5061	-0.5061	-0.5061	-0.5061	-0.5061	-0.5061	-0.5061	-0.5061	-0.5061	-0.5061	-0.5061	-0.5061	-0.5061	-0.5061	-0.5061
YNL151C	RPC31	0.1427	0.1427	0.1427	0.1427	0.1427	0.1427	-0.3455	-0.3455	-0.3455	-0.3455	-0.3455	-0.3455	-0.3455	-0.3455	-0.3455	-0.3455	-0.3455	-0.3455	-0.3455	-0.3455		0.2893	0.2893	0.2893	0.2893	0.2893	0.2893	0.2893	0.2893	0.2893	0.2893	0.2893	0.2893	0.2893	0.2893	0.2893	0.2893	0.2893	0.2893
YPL092W	SSU1								-0.6885	-0.6885	-0.6885	-0.6885	-0.6885	-0.6885	-0.6885	-0.6885	-0.6885	-0.6885	-0.6885	-0.6885	-0.6885	-0.6885	-0.6885																						-0.8453	-0.8453	-0.8453	-0.8453	-0.8453
YKL182W	FAS1	-1.2115	-1.2115	-1.2115	-1.2115	-1.2115	-1.2115																																								-0.8943	-0.8943	-0.8943
YOR356W
YDR207C	UME6	-0.0639	-0.0639		-0.4521	-0.4521	-0.4521	-0.4521	-0.4521	-0.4521	-0.4521	-0.4521	-0.4521	-0.4521	-0.4521	-0.4521	-0.4521	-0.4521	-0.4521													-0.297	-0.297	-0.297	-0.297	-0.297	-0.297	-0.297	-0.297	-0.297	-0.297	-0.297	-0.297	-0.297	-0.297	-0.297	-0.4453	-0.5441	-0.5441
YNL046W		0.211	0.211	0.211	0.211	0.211	0.211	0.211	0.211	0.211	0.211	0.211	0.211	0.211	0.211	0.211	0.211	-0.1766	-0.3428	-0.3428	-0.3428	-0.3428	-0.3428	-0.3428	-0.3428	-0.3428	-0.3428	-0.3428	-0.3428	-0.3428	-0.3428	-0.3428	-0.3428	-0.3428	0.1237	0.1237	0.1237	0.1237	0.1237	0.1237	0.1237	0.1237	0.1237	0.1237			-0.9738	-0.9738	-0.9738
YGL045W	RIM8																	-0.6909	-0.6909	-0.6909	-0.6909	-0.6909	-0.6909	-0.6909	-0.6909	-0.6909	-0.6909	-0.6909	-0.6909	-0.9905	-1.0654	-1.0654	-1.0654	-1.0654	-1.0654	-1.0654	-1.0654	-1.0654	-1.0654	-1.0654	-1.0654	-1.0654	-1.0654	-1.0654
YMR123W	PKR1	0.2233	0.2233	0.2233	0.2233	0.2233	0.2233	0.2233	0.2233	0.2233	0.2233	0.2233	0.2233	0.2233	0.2233	0.2233	0.2233	-0.0534	-0.4685	-0.4685	-0.4685	-0.4685	-0.4685	-0.4685	-0.4685	-0.4685	-0.4685	-0.4685	-0.4685	-0.4685	-0.4685	-0.4685	-0.4685
YBR132C	AGP2	-0.9931	-0.9931	-0.9931	-0.9931	-0.9931	-0.9931	-0.9931	-0.9931	-0.9931	-0.9931	-0.8147	-0.8147	-0.8147	-0.8147	-0.8147	-0.8147	-0.8147	-0.8147	-0.8147	-0.8147	-0.8147	-0.8147	-0.8147	-0.8147	-0.8147	-0.8147	-0.8147	-0.8147	0.2258	0.2258	0.2258	0.2258	0.2258	0.2258	0.2258	0.2258	0.2258	0.2258			-0.856	-0.856	-0.856	-0.856	-0.856	-0.856	-0.856	-0.856
YOR131C		1.1329	1.1329	1.1329	1.1329				0.6186	0.6186	0.6186	0.6186	0.6186	0.6186	0.6186	0.6186	0.6186	0.6186	0.6186	0.6186	0.6186	0.6186	0.51	0.3471	0.3471	0.3471	0.3471	0.3471	0.3471	0.3471	0.3471	0.3471	0.3471	0.3471	0.3471	0.3471	0.3471	0.3471
YNR043W	MVD1					0.2633	0.2633	0.2633	0.2633	0.2633	0.2633	0.2633	0.2633	0.2633	0.2633	0.2633	0.2633	0.2633	0.2633	0.2633	0.2633	0.2633	-0.0452	-0.0452	-0.0452	-0.0452	-0.0452	-0.0452	-0.0452	-0.0452	-0.0452	-0.0452						0.4748	0.4748	0.4748	0.4748	0.4748	0.4748	0.4748	0.4748	0.4748	0.4748	0.4748	-0.025
YLR213C	CRR1	-0.45	-0.45	-0.45	-0.45	-0.45	-0.45	-0.45	-0.45	-0.45	-0.45	-0.45									-1.426	-1.426	-1.426	-1.426	-1.426	-1.426	-1.426	-1.426	-1.426	-1.426	-1.426	-1.426	-1.426	-1.426	-1.426	-1.426	-1.426	-1.426
YDL160C-A			-0.3957	-0.3957	-0.3957	-0.3957	-0.3957	-0.3957	-0.3957	-0.3957	-0.3957	-0.3957	-0.3957	-0.3957																																		-1.6753	-1.6753
YLR350W	ORM2	-0.5947	-0.5947	-0.5947	-0.5947	-0.5947	-0.5947	-0.5947	-0.5947	-0.5947	-0.5947		-0.797	-0.797	-0.797	-0.797	-0.797	-0.797	-0.797	-0.797	-0.797	-0.797	-0.797														0.5764	0.5764	0.5764	0.5764	0.5764	0.5764	0.5764	0.5764	0.5764	0.5764	0.5764	0.5764	0.0068
YER023W	PRO3								-0.129	-0.129	-0.129	-0.129	-0.129	-0.129	-0.129	-0.129	-0.129	-0.129	-0.129	-0.129	-0.129	-0.7523	-0.7523	-0.7523	-0.7523	-0.7523	-0.7523	-0.7523	-0.7523	-0.7523	-0.7523	-0.7523	-0.7523	-0.7523	-0.7523	-0.7523	-0.7523	-0.7523
YPL143W	RPL33A
YCL048W-A		-0.2845	-0.2845	-0.2845	-0.2845	-0.2845	-0.2845	-0.2845	-0.2845	-0.2845	-0.2845							-0.5894	-0.5894	-0.5894	-0.5894	-0.5894	-0.5894	-0.5894	-0.5894	-0.5894	-0.5894	-0.5894	-0.5894	-0.5894	-0.5894	-0.5894	-0.5894	-0.5894	-0.6587	-0.6587	-0.6587	-0.6587	-0.6587	-0.6587	-0.6587	-0.6587	-0.6587	-0.6587	-0.6587
YLL026W	HSP104	-0.6304									-0.0911	-0.0911	-0.0911	-0.0911	-0.0911	-0.0911	-0.0911	-0.0911	-0.0911	-0.0911	-0.0911	-0.0911	-0.0911	-0.0911	-0.0911	-0.0911					-0.8522	-0.8522	-0.8522	-0.8522	-0.8522	-0.8522	-0.8522	-0.8522	-0.8522	-0.8522	-0.8522	-0.8522	-0.8522	-0.8522	-0.8522	-0.8522	-0.8522
YNL024C-A		-0.4336	-0.4336	-0.4336	-0.4336	-0.4336	-0.4336	-0.4336	-0.4336	-0.4336	-0.6761	-0.7367	-0.7367	-0.7367	-0.7367	-0.7367	-0.7367	-0.7367	-0.7367	-0.7367	-0.7367			-1.1411	-1.1411	-1.1411	-1.1411	-1.1411	-1.1411	-1.1411	-1.1411	-1.1411	-1.1411	-1.1411	-1.1411													-0.6306	-0.6306
YCR019W	MAK32					-0.9067	-0.9067	-0.9067	-0.9067	-0.9067	-0.9067	-0.9067	-0.9067	-0.9067	-0.9067	-0.9067	-0.9067	-0.9067	-0.9067	-0.7222	-0.7222	-0.7222	-0.7222	-0.7222	-0.7222	-0.7222	-0.7222	-0.7222	-0.7222	-0.7222	-0.7222																-0.7811	-0.7811	-0.7811
YNL286W	CUS2	-0.7665	-0.7665	-0.7665	-0.7665	-0.7665	-0.7665	-0.7665	-0.7665	-0.7665		-0.4445	-0.4445	-0.4445	-0.4445	-0.4445	-0.4445	-0.4445	-0.4445	-0.4445	-0.4445	-0.4445					-0.3565	-0.3565	-0.3565	-0.3565	-0.3565	-0.3565	-0.3565	-0.3565	-0.3565	-0.3565	-0.3565	-0.3565	-0.3565	-0.3565				-0.2107	-0.2107	-0.2107	-0.2107	-0.2107	-0.2107
YDL130W	RPP1B	-0.6278	-0.6278	-0.6278	-0.6278							-0.714	-0.714	-0.714	-0.714	-0.714	-0.714	-0.714	-0.714	-0.714	-0.714	-0.714	-0.714	-0.714	-0.714
YLR064W		0.3467	0.3467	0.3467							0.2007	0.2007	0.2007	0.2007	0.2007	0.2007	0.2007	0.2007	0.2007	0.2007	0.2007			-0.4298	-0.4298	-0.4298	-0.4298	-0.4298	-0.4298	-0.4298	-0.4298	-0.4298	-0.4298	-0.4298	-0.4298	-0.4298	-0.4298	-0.4298	-0.4298
YER063W	THO1	-0.6112	-0.6112	-0.6112	-0.6112	-0.6112	-0.6112	-0.6112	-0.6112	-0.6112	-0.6112	-0.6112	-0.6112	-0.6112	-0.6112	-0.6112			-0.8242	-0.8242	-0.8242	-0.8242	-0.8242	-0.8242	-0.8242	-0.8242	-0.8242	-0.8242	-0.8242	-0.8242	-0.8242													0.0503	0.0503	0.0503	0.0503	0.0503	0.0503
YNL063W	MTQ1	-1.1201							-0.9591	-0.9591	-0.9591	-0.9591	-0.9591	-0.9591	-0.9591	-0.9591	-0.9591	-0.9591	-0.9591	-0.9591																									-0.441	-0.441	-0.441	-0.441	-0.441
YER019C-A	SBH2	-0.5885	-0.5885	-0.5885	-0.5885	-0.5885	-0.5885	-0.5885	-0.5885	-0.5885	-0.5885	-0.5885	-0.5885	-0.5885					-1.0975	-1.0975	-1.0975	-1.0975	-1.0975	-1.0975	-1.0975	-1.0975	-1.0975	-1.0975	-1.0975	-1.0975	-1.0975	-1.0975	-1.0975	-1.0975	-1.0975	-1.0975
YKL144C	RPC25	0.8818	0.8818	0.8818	0.8818				0.2548	0.2548	0.2548	0.2548	0.2548	0.2548	0.2548	0.2548	0.2548	0.2548	0.2548	0.2548	0.3713	0.3713	0.3713	0.3713	0.3713	0.3713	0.3713	0.3713	0.3713	0.3713	0.3713	0.3713																	-0.129
YKL163W	PIR3	-0.8453	-0.8453	-0.8453	-0.8453	-0.8453	-0.8453	-0.8453	-0.7584	-0.7367	-0.7367	-0.7367	-0.7367	-0.7367	-0.7367	-0.7367	-0.7367	-0.7367	-0.7367	-0.7367												-0.5086	-0.5086	-0.5086	-0.5086	-0.5086	-0.5086	-0.5086	-0.5086	-0.5086	-0.5086	-0.5086	-0.5086	-0.5086	-0.5086	-0.1884	-0.1884	-0.1884	-0.1884
YGR209C	TRX2	-0.0835	-0.0835	-0.0835	-0.0835	-0.0835	-0.0835	-0.0835				-0.4504	-0.4504	-0.4504	-0.4504	-0.4504	-0.4504	-0.4504	-0.4504	-0.4504	-0.4504	-0.4504	-0.2764	-0.2764	-0.2764	-0.2764	-0.2764	-0.2764	-0.2764	-0.2764	-0.2764	-0.2764	-0.2764	-0.2764	-0.2764	-0.2764	-0.3878	-0.7222	-0.7222	-0.7222	-0.7222	-0.7222	-0.7222	-0.7222	-0.7222	-0.7222	-0.765	-0.8719	-0.8719
YGR279C	SCW4
YDR174W	HMO1	0.5528	0.5528	0.5528	0.5528	0.5528	0.5528	0.5528	0.5528	0.5528	0.5528	0.5528	0.5528	0.5528
YBR240C	THI2	-0.2499	-0.2499	-0.2499	-0.2455	-0.21	-0.21	-0.21	-0.21	-0.21	-0.21	-0.21	-0.21	-0.21	-0.21	-0.21	-0.21	-0.21							-0.7496	-0.7496	-0.7496	-0.7496	-0.7496	-0.7496	-0.7496	-0.7496	-0.7496	-0.7496	-0.7496	-0.6055	-0.6055	-0.6055	-0.6055	-0.6055	-0.6055	-0.6055	-0.6055	-0.6055	-0.6055	-0.6055	-0.3514	-0.3514	-0.3514
YLL049W	LDB18	-0.0475	-0.0475	-0.0475	-0.0475	-0.0475	-0.0475	-0.0475	-0.0475	-0.0475	-0.0475	-0.0475	-0.0475	-0.0475	-0.0587	-0.0587	-0.0587	-0.0587	-0.0587	-0.0587	-0.0587	-0.0587	-0.0587	-0.0587	-0.0587	-0.0587	-0.0587	-0.0587	-0.0587																	-0.5132	-0.5132	-0.5132	-0.5132
YBR269C	FMP21	-0.2612	-0.2612	-0.2612	-0.2612	-0.2612	-0.9067	-0.9067	-0.9067	-0.9067	-0.9067	-0.9067	-0.9067	-0.9067	-0.9067	-0.9067	-0.9067	-0.9067	-0.9067	-0.9067	-0.2546	-0.2546	-0.2546	-0.2546	-0.2546	-0.2546	-0.2546	-0.2546	-0.2546	-0.2546	-0.2546	-0.2546	-0.2546	-0.2546	-0.2546				-0.1642	-0.1642	-0.1642	-0.1642	-0.1642	-0.1642	-0.1642	-0.1642	-0.1642	-0.1642	-0.1642
YKL106C-A		0.1511	0.1511	0.1511	0.1511	0.1511	0.1511			-0.0052	-0.0052	-0.0052	-0.0052	-0.0052	-0.0052	-0.0052	-0.0052	-0.0052	-0.0052	-0.0052								-0.3408	-0.3408	-0.3408	-0.3408	-0.3408	-0.3408	-0.3408	-0.3408	-0.3408	-0.3408	-0.3408	-0.3408	-0.3408	-0.3408	-0.3408	-0.3408
YJR025C	BNA1	-1.0475	-1.0475		-0.8453	-0.8453	-0.8453	-0.8453	-0.8453	-0.8453	-0.8453	-0.8453	-0.8453	-0.8453	-0.8453	-0.8453	-0.8453	-0.8453	-0.8453	-0.8453	-0.8453	-0.8453						-0.9655	-0.9655	-0.9655	-0.9655	-0.9655	-0.9655	-0.9655	-0.9655	-0.9655	-0.9655	-0.9655	-0.9655	-0.9655	-0.8911	-0.8911	-0.8911	-0.8911	-0.8911	-0.8911	-0.8911	-0.8911	-0.8911
YHR137W	ARO9	-0.9067	-0.9067	-0.9067	-0.9067	-0.9067	-0.9067	-0.9067	-0.9067	-0.9067	-0.9067	-0.9067	-0.9067	-0.9067	-0.9067	-0.9067											-1.4813	-1.4813	-1.4813	-1.4813	-1.4813	-1.4813	-1.4813	-1.4813	-1.4813	-1.4813	-1.4813	-1.4813	-1.4813	-1.4813	-1.4813	-1.4813	-1.4813
YEL057C		0.2285	0.2285	0.2285	0.2285	0.2285	0.2285	0.2285	0.2285	0.2285	0.2285	0.2285		-0.1518	-0.1518	-0.1518	-0.1518	-0.1518	-0.1518	-0.1518	-0.1518	-0.1518	-0.1518	-0.1518	-0.1518	-0.1518	-0.1518	-0.1518	-0.1518	-0.1518	-0.4472	-0.4472	-0.4472	-0.4472	-0.4472	-0.4472	-0.4472	-0.4472	-0.4472	-0.4472	-0.4472	-0.4472	-0.4472	-0.4472	-0.4472	-0.4472	-0.4472	-0.4472	-0.1477
YNL113W	RPC19	-0.9377	-1.1582	-1.1582	-1.1582	-1.1582	-1.1582	-1.1582	-1.1582	-1.1582	-1.1582	-1.1582	-1.1582	-1.1582									-0.8836	-0.8836	-0.8836	-0.8836	-0.8836	-0.8836	-0.8836	-0.8836	-0.8836	-0.8836	-0.8836
YDR063W		-0.4737	-0.4737	-0.4737	-0.4737	-0.4737	-0.4737	-0.4737	-0.4737	-0.4737	-0.4737
YLR266C	PDR8	-0.5101	-0.5101	-0.5101	-0.5101	-0.5101	-0.5101	-0.5101	-0.5101	-0.5101	-0.5101	-0.5101	-0.5101	-0.5101	-0.5101	-0.5101						-0.6436	-0.6436	-0.6436	-0.6436	-0.6436	-0.6436	-0.6436	-0.6436	-0.6436	-0.6436	-0.6436	-0.6436	-0.6436	-0.6436	-0.6436	-0.6436	-0.6436	-0.6436	-1.1411	-1.1411	-1.1411	-1.1411	-1.1411	-1.1411	-1.1411	-1.1411	-1.1411	-1.1411
YBR268W	MRPL37			-0.1856	-0.1856	-0.1856	-0.1856	-0.1856	-0.1856	-0.1856	-0.1856	-0.1856	-0.1856	-0.1856	-0.1856	-0.1856	-0.1856	-0.1856	-0.1856	0.0002	0.0002	0.0002	0.0002	0.0002	0.0002	0.0002	0.0002	0.0002	0.0002	0.0002	-0.55	-0.55	-0.55	-0.55	-0.55	-0.55	-0.55	-0.55	-0.55	-0.55
YHR022C																																					-0.7623	-0.7623	-0.7623	-0.7623	-0.7623	-0.7623	-0.7623	-0.7623	-0.7623	-0.7623	-0.7623	-0.7122	-0.7122
YNL037C	IDH1																																										-0.7692	-0.7692	-0.7692	-0.7692	-0.7692	-0.7692	-0.7692
YER060W	FCY21												0.0804	0.0804	0.0804	0.0804	0.0804	0.0804	0.0804	0.0804	0.0804	0.0804	0.0804	0.0804	0.0804	-0.3217	-0.3217	-0.3217	-0.3217	-0.3217	-0.3217	-0.3217	-0.3217	-0.3217	-0.3217	-0.3217	-0.3217	-0.3217	-0.3217	-0.3217	-0.3217	-0.3217	-0.3217
YDR044W	HEM13	-0.3921	-0.3921	-0.3921	-0.3921	-0.3921	-0.3921	-0.3921	-0.3921
YOR011W	AUS1		-0.3217	-0.3217	-0.3217	-0.3217	-0.3217	-0.3217	-0.3217	-0.3217	-0.3217	-0.3217	-0.3217	-0.3613	-0.3851	-0.3851	-0.3851	-0.3851	-0.3851	-0.3851	-0.3851	-0.3851	-0.3851	-0.3851	-0.3851	-0.3851	-0.1697	-0.1697	-0.1697	-0.1697	-0.1697	-0.1697	-0.1697	-0.1697	-0.1697	-0.1697	-0.1697	-0.1697						-0.6436	-0.6436	-0.6436	-0.6436	-0.6436	-0.6436
YDL057W		-0.3549	-0.3549	-0.3549			-1.0689	-1.0689	-1.0689	-1.0689	-1.0689	-1.0689	-1.0689	-1.0689	-1.0689	-1.0689	-1.0689	-1.0689	-1.0689	-1.0689	-1.0689	-1.0689	-1.0689						-0.4179	-0.4179	-0.4179	-0.4179	-0.4179	-0.4179	-0.4179	-0.4179	-0.4179	-0.4179	-0.4179	-0.4179	-0.4179	-0.4179	-0.4179	-0.4179	-0.6894	-0.6894	-0.6894	-0.6894	-0.6894
YBL026W	LSM2			-0.793	-0.793	-0.793	-0.793	-0.793	-0.793	-0.793	-0.793	-0.793	-0.793	-0.793	-0.793									-1.0487	-1.0487	-1.0487	-1.0487	-1.0487	-1.0487	-1.0487	-1.0487	-1.0487	-1.0487	-1.0487	-1.0487	-1.0487	-1.0487	-1.0487	-1.0487	-1.0487	-1.0487
YMR069W	NAT4	-0.2784	-0.4858	-0.4858	-0.4858	-0.4858	-0.4858	-0.4858	-0.4858	-0.4858	-0.4858	-0.4858	-0.4858	-0.4858	-0.4858	-0.4858	-0.4858	-0.4858	-0.541	-0.541	-0.541	-0.541	-0.541	-0.541	-0.541	-0.541	-0.541	-0.541	-0.541	-0.541	-0.541																	-0.8868	-0.8868
YDL230W	PTP1	0.754	0.754	0.754	0.754	0.754	0.754	0.4153	0.4153	0.4153	0.4153	0.4153	0.4153	0.4153	0.4153	0.4153	0.4153	0.4153	0.4153	0.4153	0.4153	0.4153	0.4153	0.4153	0.4153																							-0.2942	-0.2942
YJR019C	TES1	-0.0626	-0.0626	-0.0626	-0.0978	-0.1856	-0.1856	-0.1856	-0.1856	-0.1856	-0.1856	-0.1856	-0.1856	-0.1856	-0.1856	-0.1856	-0.1856	-0.5658	-0.6291	-0.6291	-0.6291	-0.6291	-0.6291	-0.6291	-0.6291	-0.6291	-0.6291	-0.6291	-0.6291	-0.6291	-0.6291	-0.6291	-0.6291	-0.6291	-0.4069	-0.2736	-0.2736	-0.2736	-0.2736	-0.2736	-0.2736	-0.2736	-0.2736	-0.2736	-0.2736	-0.2736		-0.0269	-0.0269
YNL178W	RPS3	-1.1656	-0.766	-0.766	-0.766	-0.766	-0.766	-0.766	-0.766	-0.766	-0.766	-0.766	-0.766	-0.766	-0.766	-0.766	-0.766
YLR053C		-0.6726	-0.6726	-0.6726	-0.6726	-0.6726	-0.6726	-0.6726	-0.6726	-0.6726	-0.6726	-0.6726	-0.6726	-0.6726	-0.6726					-0.8484	-0.8484	-0.8484	-0.8484	-0.8484	-0.8484	-0.8484	-0.8484	-0.8484	-0.8484	-0.8484	-0.8484	-0.8484	-0.8484	-0.8484	-0.8484	-0.8484	-0.6627	-0.6627	-0.6627	-0.6627	-0.6627	-0.6627	-0.6627	-0.6627	-0.6627	-0.6627	-0.6627	-0.6627	-0.3217
YHR140W		-0.8887	-0.8887	-0.8887	-0.3716	-0.2423	-0.2423	-0.2423	-0.2423	-0.2423	-0.2423	-0.2423	-0.2423	-0.2423	-0.2423	-0.2423	-0.2423	-0.5407	-0.5407	-0.5407	-0.5407	-0.5407	-0.5407	-0.5407	-0.5407	-0.5407	-0.5407	-0.5407	-0.5407
YLR438W	CAR2	-0.8972	-0.8972	-0.8972	-0.8972	-0.8972	-0.8972	-0.8972	-0.8972	-0.8972																																			-0.8742	-0.8742	-0.8742	-0.8742	-0.8742
YDR124W		-0.1625	-0.1625	-0.1625	-0.1625	-0.1625	-0.1625	-0.1625	-0.1625	-0.1625	-0.1625	-0.1625	-0.1625	-0.1625	-0.1625	-0.1625	-0.1625	-0.1625	-0.4257	-0.5573	-0.5573	-0.5573	-0.5573	-0.5573	-0.5573	-0.5573	-0.5573	-0.5573	-0.5573	-0.5573	-0.5573	-0.5573	-0.5573	-0.5573		-1.0442	-1.0442	-1.0442	-1.0442	-1.0442	-1.0442	-1.0442	-1.0442	-1.0442	-1.0442
YDL222C	FMP45	-1.3907	-1.3907	-1.3907	-1.3907																						-0.8873	-0.8873	-0.8873	-0.8873	-0.8873	-0.8873	-0.8873	-0.8873	-0.8873	-0.8873	-0.8873	-0.8873	-0.8873	-0.8873	-0.8873	-0.707	-0.4066	-0.4066	-0.4066	-0.4066	-0.4066	-0.4066	-0.4066
YJR056C		-0.9067	-0.9067	-0.9067	-0.9067	-0.9067	-0.9067																																										-0.1228
YKL071W		-0.3492	-0.3492	-0.3492	-0.3492	-0.3492	-0.3492	-0.3492					-0.521	-0.521	-0.521	-0.521	-0.521	-0.521	-0.521	-0.521	-0.521	-0.521	-0.521	-0.521	-0.521	-0.521	-0.521	-0.521	-0.6267	-0.6972	-0.6972	-0.6972	-0.6972	-0.6972	-0.6972	-0.6972	-0.6972	-0.6972	-0.6972	-0.6972	-0.5346	-0.2907	-0.2907	-0.2907	-0.2907	-0.2907	-0.2907	-0.2907	-0.2907
YDR059C	UBC5	0.1808	0.1808	0.1808	0.1808	0.1808	0.1808	0.1808	0.1808	0.1808							-0.9305	-0.9305	-0.9305	-0.9305	-0.9305	-0.9305	-0.9305	-0.9305	-0.9305	-0.9305	-0.9305	-0.9305			-0.9941	-0.9941	-0.9941	-0.9941	-0.9941	-0.9941	-0.9941	-0.9941	-0.9941	-0.9941								-0.5896	-0.5896
YEL027W	CUP5
YOL159C-A		-1.6213						-0.8165	-0.8165	-0.8165	-0.8165	-0.8165	-0.8165	-0.8165	-0.8165	-0.8165	-0.8165	-0.8165	-0.8165		-0.4916	-0.4916	-0.4916	-0.4916	-0.4916	-0.4916	-0.4916	-0.4916	-0.4916	-0.4916	-0.4916	-0.4916	-0.4916	-0.4916	-0.4916	-0.4916	-0.747	-0.747	-0.747	-0.747	-0.747	-0.747	-0.747	-0.747	-0.747	-0.747	-0.747	-0.747	-0.747
YCL026C-B	HBN1	-0.5143	-0.5143	-0.5143	-0.5143	-0.5143	-0.5143	-0.5143	-0.5143	-0.5143	-0.5143	-0.5143	-0.5143	-0.5143	-0.5143	-0.1719	-0.1719	-0.1719	-0.1719	-0.1719	-0.1719	-0.1719	-0.1719	-0.1719	-0.1719	-0.1719	-0.1719	-0.1719	-0.1719	-0.1719	-0.1719						-0.451	-0.451	-0.451	-0.451	-0.451	-0.451	-0.451	-0.451	-0.451	-0.451	-0.451	-0.451	-0.451
YLR340W	RPP0	-1.0904	-1.0904	-1.0904	-1.0904	-1.0904	-1.0904	-1.0904	-1.0904	-1.0904	-1.0904	-1.0904	-1.0904	-1.0904	-0.1518	-0.1518	-0.1518	-0.1518	-0.1518	-0.1518	-0.1518	-0.1518	-0.1518	-0.1518	-0.1518
YBR230C	OM14			-0.8425	-0.8425	-0.8425	-0.8425	-0.8425	-0.8425	-0.8425	-0.8425	-0.8425	-0.8425	-0.8425	-0.8425	-0.8425	-0.8425	-0.8425	-0.8425	-1.0932	-1.2603	-1.2603	-1.2603	-1.2603	-1.2603	-1.2603	-1.2603	-1.2603	-1.2603	-1.2603	-1.2603	-1.2603	-1.2603	-1.2603	-1.2603	-1.2603											-0.2098	-0.2098	-0.2098
YJL161W	FMP33			-0.5973	-0.5973	-0.5973	-0.5973	-0.5973	-0.5973	-0.5973	-0.5973	-0.5973	-0.5973	-0.5973	-0.5973	-0.5973	-0.7623	-0.7623	-0.7623	-0.7623	-0.7623	-0.7623	-0.7623	-0.7623	-0.7623	-0.7623	-0.7623	-0.7623	-0.7623	-0.7623	-0.7623	-0.7623	-0.7623	-0.7623	-0.3376	-0.3376	-0.3376	-0.3376	-0.3376	-0.3376	-0.3376	-0.3376	-0.3376	-0.3376	-0.3376	-0.3376	-0.3376	-0.3376	-0.3376
YPR100W	MRPL51	-0.5407	-0.5407	-0.5407	-0.5326	-0.5	-0.5	-0.5	-0.5	-0.5	-0.5	-0.5	-0.5	-0.5	-0.5	-0.5	-0.5	-0.5	-0.5	-1.0399	-1.0399	-1.0399	-1.0399	-1.0399	-1.0399	-1.0399	-1.0399	-1.0399	-1.0399	-1.0399	-1.0399	-1.0399	-1.0399	-1.0399	-1.0399	-1.0399	-1.0399
YGR141W	VPS62	-0.8653	-0.8653	-0.8653	-0.8653	-0.8653	-0.8653	-0.8653	-0.8653	-0.8653							-0.4267	-0.4267	-0.4267	-0.4267	-0.4267	-0.4267	-0.4267	-0.4267	-0.4267	-0.4267	-0.4267	-0.4267																		-0.6164	-0.6164	-0.6164	-0.6164
YNL010W		-0.0492	-0.0492	-0.0492	-0.0492	-0.0492	-0.0492	-0.0492	-0.0492	-0.0492	-0.0492	-0.0492	-0.0492	-0.0492												-0.7505	-0.7505	-0.7505	-0.7505	-0.7505	-0.7505	-0.7505	-0.7505	-0.7505	-0.7505	-0.7505	-0.7505	-0.7505										-0.7811	-0.7811
YML081C-A	ATP18	0.0838	0.0838	0.0838	0.0838	0.0838	0.0838	0.0838	0.0838	0.0838	0.0838	0.0838	0.0838	0.0838													-1.6436	-1.6436	-1.6436	-1.6436	-1.6436	-1.6436	-1.6436	-1.6436	-1.6436	-1.6436	-1.6436	-1.6436	-1.6436	-1.6436
YMR130W		-0.7724	-0.7724	-0.7724	-0.7724	-0.7724	-0.7724		-0.4353	-0.4353	-0.4353	-0.4353	-0.4353	-0.4353	-0.4353	-0.4353	-0.4353	-0.4353	-0.531	-0.5789	-0.5789	-0.5789	-0.5789	-0.5789	-0.5789	-0.5789	-0.5789	-0.5789	-0.5789
YNL066W	SUN4	-1.2423	-1.2423	-1.2423	-1.2423	-1.2423	-1.2423	-1.2423
YJR103W	URA8	-0.0679	-0.0679	-0.0679	-0.0679	-0.0679	-0.0679							0.2308	0.2308	0.2308	0.2308	0.2308	0.2308	0.2308	0.2308	0.2308	0.2308																						0.5263	0.5263	0.5263	0.5263	0.5263
YLR395C	COX8	-0.8071	-0.8071	-0.8071	-0.8071	-0.8071	-0.8071	-0.8071	-0.8071	-0.8071	-0.8071	-0.8071	-0.8071	-0.8071	-0.8071				-0.3217	-0.3217	-0.3217	-0.3217	-0.3217	-0.3217	-0.3217	-0.3217	-0.3217	-0.3217	-0.3217														0.3157	0.3157	0.3157	0.3157	0.3157	0.3157	0.3157
YBL028C
YPL224C	MMT2	-0.4942	-0.4942	-0.4942	-0.4942	-0.4942			-0.5686	-0.5686	-0.5686	-0.5686	-0.5686	-0.5686	-0.5686	-0.5686	-0.5686	-0.5686	-0.5686	-0.5686	-0.5686	-0.5686	-0.5686	-0.5686	-0.5686											-0.5358	-0.5358	-0.5358	-0.5358	-0.5358	-0.5358	-0.5358	-0.5358	-0.5358	-0.5358	-0.3752	-0.3217	-0.3217	-0.3217
YJL177W	RPL17B	-0.6764	-0.6764
YDR171W	HSP42	-0.1749	-0.1749	-0.1749										-0.5039	-0.5039	-0.5039	-0.5039	-0.5039	-0.5039	-0.5039	-0.5039	-0.5039	-0.5039	-0.5039	-0.5039	-0.5117	-0.5143	-0.5143	-0.5143	-0.5143	-0.5143	-0.5143	-0.5143	-0.5143	-0.5143	-0.5143	-0.5143	-0.5143	-0.5143	-0.5058	-0.4916	-0.4916	-0.4916	-0.4916	-0.4916	-0.4916	-0.4916	-0.4916	-0.4916
YMR102C																																					-1.4148	-1.4148	-1.4148	-1.4148	-1.4148	-1.4148	-1.4148	-1.4148	-1.4148	-1.4148	-1.4148	-1.4148
YMR147W														-0.0461	-0.0461	-0.0461	-0.0461	-0.0461	-0.0461	-0.0461	-0.0461	-0.0461	-0.0461	-0.1359	-0.4054	-0.4054	-0.4054	-0.4054	-0.4054	-0.4054	-0.4054	-0.4054	-0.4054	-0.4054	-0.4054	-0.4054	-0.4054	-0.4054							-0.3217	-0.3217	-0.3217	-0.3217	-0.3217
YKL151C		0.075	0.075	0.075	0.075	0.075	0.075	0.075				-0.4555	-0.4555	-0.4555	-0.4555	-0.4555	-0.4555	-0.4555	-0.4555	-0.4555	-0.4555	-0.4555	-0.4555	-0.4555	-0.4555	-0.4555		-0.4611	-0.4611	-0.4611	-0.4611	-0.4611	-0.4611	-0.4611	-0.4611	-0.4611	-0.4611	-0.4611	-0.4611	-0.2121	-0.2121	-0.2121	-0.2121	-0.2121	-0.2121	-0.2121	-0.2121	-0.2121	-0.2121
YDL170W	UGA3	-0.5973	-0.5973	-0.5973	-0.5973	-0.5973	-0.5973	-0.5973	-0.5973																																							0.0568	0.0568
YGL158W	RCK1		-1.0587	-1.0587	-1.0587	-1.0587	-1.0587	-1.0587	-1.0587	-1.0587	-1.0587	-1.0587	-1.0587	-1.0587	-1.0587	-1.0587
YPL037C	EGD1	-0.6436		-0.9998	-0.9998	-0.9998	-0.9998	-0.9998	-0.9998	-0.9998	-0.9998	-0.9998	-0.9998	-0.9998	-0.9998	-0.8071	-0.8071	-0.8071	-0.8071	-0.8071	-0.8071	-0.8071	-0.8071	-0.8071	-0.8071	-0.8071	-0.8071	-0.8071	-0.8071
YGR251W		-0.1842	-0.1842	-0.1842	-0.1842	-0.1842	-0.1842	-0.1842	-0.1842	-0.1842	-0.1842	-0.1842	-0.1842	-0.1842	-0.1842	-0.1842	-0.1842	-0.1995	-0.3217	-0.3217	-0.3217	-0.3217	-0.3217	-0.3217	-0.3217	-0.3217	-0.3217					0.7081	0.7081	0.7081	0.7081	0.7081	0.7081	0.7081	0.7081	0.7081	0.7081	0.7081	0.7081	0.7081
YIL011W	TIR3	-0.55	-0.55	-0.55	-1.0664	-1.0664	-1.0664	-1.0664	-1.0664	-1.0664	-1.0664	-1.0664	-1.0664	-1.0664	-1.0664																		-0.5332	-0.5332	-0.5332	-0.5332	-0.5332	-0.5332	-0.5332	-0.5332	-0.5332	-0.5332	-0.5974	-0.6937	-0.6937	-0.6937	-0.6937	-0.6937	-0.6937
YDL128W	VCX1
YOR152C																											-0.9591	-0.9591	-0.9591	-0.9591	-0.9591	-0.9591	-0.9591	-0.9591	-0.9591	-0.9591	-0.9591	-0.9591
YDR405W	MRP20	0.2972	0.2972	0.2972	0.2972										-0.4916	-0.4916	-0.4916	-0.4916	-0.4916	-0.4916	-0.4916	-0.4916	-0.4916	-0.4916	-0.4916	-0.4916	-0.4916	-0.4916	-0.4916	-0.4916	-0.4916	-0.4916	-0.4916
YDR296W	MHR1	-0.1773	-0.1773	-0.1773	-0.1773	-0.1773	-0.1773	-0.1773	-0.1773	-0.1773	-0.1773																																						-0.55
YOR186W		-0.5847	-0.5847	-0.5847	-0.5847	-0.5847		0.3716	0.3716	0.3716	0.3716	0.3716	0.3716	0.3716	0.3716	0.3716	0.3716	0.3716	0.3716	0.3716	0.3716	0.3716	0.3716	0.2876	-0.4685	-0.4685	-0.4685	-0.4685	-0.4685	-0.4685	-0.4685	-0.4685	-0.4685	-0.4685	-0.4685	-0.4685	-0.4685
YGL191W	COX13												-0.6801	-0.6801	-0.6801	-0.6801	-0.6801	-0.6801	-0.6801	-0.6801	-0.6801	-0.6801	-0.6801	-0.6801	-0.6801	-0.259	-0.259	-0.259	-0.259	-0.259	-0.259	-0.259	-0.259	-0.259	-0.259	-0.259	-0.259	-0.1518	-0.1518	-0.1518	-0.1518	-0.1518	-0.1518	-0.1518	-0.1518	-0.1518	-0.1518	-0.1518	-0.1518
YOR006C		-0.2754	-0.2754	-0.2754	-0.2754	-0.2754	-0.2754	-0.2754	-0.2754	-0.2754	-0.2754	-0.2754	-0.2754	-0.2754	-0.2754	-0.2754			-0.8964	-0.8964	-0.8964	-0.8964	-0.8964	-0.8964	-0.8964	-0.8964	-0.8964	-0.8964	-0.8964
YER153C	PET122				-0.2803	-0.2803	-0.2803	-0.2803	-0.2803	-0.2803	-0.2803	-0.2803	-0.2803	-0.2803	-0.2803	-0.2803	-0.2803	-0.2803	-0.2803	-0.2803	-0.2803			0.0039	0.0039	0.0039	0.0039	0.0039	0.0039	0.0039	0.0039	0.0039	0.0039	0.0039	0.0039	0.0039	0.0039	0.0039	0.0039							-0.1031	-0.1031	-0.1031	-0.1031
YJL048C	UBX6	-1.3997	-1.3997	-1.3997	-1.3997	-1.3997	-1.3997	-1.3997													-0.8671	-0.8671	-0.8671	-0.8671	-0.8671	-0.8671	-0.8671	-0.8671	-0.8671	-0.8671	-0.8671	-0.8671	-0.8671	-0.8671	-0.8671	-0.8671	-0.8671							-0.9384	-0.9384	-0.9384	-0.9384	-0.9384	-0.9384
YKL068W-A		-1.2392	-1.2392	-1.2392	-1.2392	-1.2392	-1.2392	-1.2392	-1.2392	-1.2392	-1.2392	-1.2392	-1.2392	-1.2392	-1.2392	-1.2392	-1.2392	-1.2392
YMR292W	GOT1						-0.2907	-0.2907	-0.2907	-0.2907	-0.2907	-0.2907	-0.2907	-0.2907	-0.2907	-0.2907														-0.9294	-0.9294	-0.9294	-0.9294	-0.9294	-0.9294	-0.9294	-0.9294	-0.9294	-0.9294	-0.9294	-0.9294							-0.3217	-0.3217
YBR189W	RPS9B	0.0283	0.0283	0.0283	0.0283	0.0283	0.0283	0.0283	0.0283	0.0283		0.2723	0.2723	0.2723	0.2723	0.2723	0.2723	0.2723	0.2723	0.2723	0.2723	0.2723	0.2723	0.2723	0.2723	0.2723	0.2723	0.2723
YDR529C	QCR7	-0.021	-0.021	-0.021	-0.021	-0.021	-0.021	-0.021	-0.021	-0.021	-0.021	-0.021	-0.021	-0.021	-0.021	-0.021	-0.4757	-0.5407	-0.5407	-0.5407	-0.5407	-0.5407	-0.5407	-0.5407	-0.5407	-0.5407	-0.5407	-0.5407	-0.5407	-0.5407	-0.5407	-0.5407	-0.5407	-0.5407	0.545	0.545	0.545	0.545	0.545	0.545	0.545	0.545	0.545	0.545	0.545	-0.4248	-0.4248	-0.4248	-0.4248
YNL260C		-0.9708	-0.9708	-0.9708	-0.9708	-0.9708	-0.9708	-0.9708	-0.9708	-0.9708	-0.9708
YCL056C																																	-0.5896	-0.5896	-0.5896	-0.5896	-0.5896	-0.5896	-0.5896	-0.5896	-0.5896	-0.5896	-0.5896	-0.5896
YGR036C	CAX4	-0.8577	-0.8577	-0.8577	-0.8577	-0.8577	-0.8577	-0.8577	-0.8577											-0.6369	-0.6369	-0.6369	-0.6369	-0.6369	-0.6369	-0.6369	-0.6369	-0.6369	-0.6369	-0.6369	-0.6369	-0.6369	-0.6369	-0.6369	-0.6369	-0.6369
YER079W					-0.856	-0.856	-0.856	-0.856	-0.856	-0.856	-0.856	-0.856	-0.856	-0.856	-0.641	0.2189	0.2189	0.2189	0.2189	0.2189	0.2189	0.2189	0.2189	0.2189	0.2189				-0.4518	-0.4518	-0.4518	-0.4518	-0.4518	-0.4518	-0.4518	-0.4518	-0.4518	-0.4518	-0.4518	-0.4518	-0.4518	-0.4518	-0.4518	-0.4518	-0.4518	-0.4518
YOR347C	PYK2	-0.7955	-0.1842	-0.1842	-0.1842	-0.1842	-0.1842	-0.1842	-0.1842	-0.1842	-0.1842	-0.1842	-0.1842	-0.1842	-0.1842	-0.1842	-0.1842	-0.1842			-0.1518	-0.1518	-0.1518	-0.1518	-0.1518	-0.1518	-0.1518	-0.1518	-0.1518	-0.1518	-0.1518	-0.1518	-0.1518	-0.1518	-0.1518	-0.1518	-0.1518	-0.1518	-0.1518										-0.0654
YMR319C	FET4	-1.3761	-1.3761	-1.3761	-1.3761	-1.3761							-0.6135	-0.6135	-0.6135	-0.6135	-0.6135	-0.6135	-0.6135	-0.6135	-0.6135	-0.6135	-0.6135	-0.6135	-0.6135	-0.6135																		-1.0076	-1.0076	-1.0076	-1.0076	-1.0076	-1.0076
YOR285W		-0.3912	-0.3912	-0.3912	-0.3912	-0.3912	-0.3912	-0.3912	-0.3912	-0.3912	-0.3912	-0.3912	-0.3912	-0.3912	-0.3912	-0.3912	-0.4891	-0.4891	-0.4891	-0.4891	-0.4891	-0.4891	-0.4891	-0.4891	-0.4891	-0.4891	-0.4891	-0.4891	-0.4891	-0.4891	-0.4891	-0.4891	-0.4891																-0.6436
YLR254C	NDL1			-0.8836	-0.8836	-0.8836	-0.8836	-0.8836	-0.8836	-0.8836	-0.8836	-0.8836	-0.8836	-0.8836	-0.8836			-0.8155	-0.8155	-0.8155	-0.8155	-0.8155	-0.8155	-0.8155	-0.8155	-0.8155	-0.8155
YHR082C	KSP1	-0.4812	-0.4812	-0.4812	-0.4812	-0.4812	-0.4812	-0.4812	-0.4812	-0.3443	-0.2075	-0.2075	-0.2075	-0.2075	-0.2075	-0.2075	-0.2075	-0.2075	-0.2075	-0.2075	-0.2075	-0.2075	-0.2075	-0.2075	-0.2075	-0.2075	-0.6147	-0.6147	-0.6147	-0.6147	-0.6147	-0.6147	-0.6147	-0.6147	-0.6147	-0.6147	-0.6147	-0.6147	-0.6147	-0.1893	0.4488	0.4488	0.4488	0.4488	0.4488	0.4488	0.4488	0.4488	0.4488
YDR246W	TRS23	-0.1983	-0.1983	-0.1983	-0.1983	-0.1983	-0.1983	-0.1983	-0.1983	-0.1983	-0.1983	-0.1983	-0.1983	-0.1983	-0.1983	-0.1983	-0.1983																															-0.0587	-0.0587
YIL133C	RPL16A
YGL185C									0.0085	0.0085	0.0085	0.0085	0.0085	0.0085	0.0085	0.0085	0.0085	0.0085	0.0085	0.0085	0.0085	0.0085													-0.5196	-0.5196	-0.5196	-0.5196	-0.5196	-0.5196	-0.5196	-0.5196	-0.5196	-0.5196	-0.5196	-0.5196	-0.4649	-0.3006	-0.3006
YML113W	DAT1	0.3518	0.3518	0.3518	0.3518	0.3518	0.3518	0.3518	0.3518	0.5989	0.5989	0.5989	0.5989	0.5989	0.5989	0.5989	0.5989	0.5989	0.5989	0.4791	-0.5988	-0.5988	-0.5988	-0.5988	-0.5988	-0.5988	-0.5988	-0.5988	-0.5988	-0.5988	-0.5988	-0.5988	-0.5988	-0.5988
YER154W	OXA1	-0.5107	-0.5107	-0.5107	-0.5107	-0.5107	-0.5107	-0.5107	-0.5107	-0.5107	-0.5107	-0.5107	-0.2024	-0.2024	-0.2024	-0.2024	-0.2024	-0.2024	-0.2024	-0.2024	-0.2024	-0.2024	-0.2024	-0.2024	-0.2024	-0.7125	-0.7125	-0.7125	-0.7125	-0.7125	-0.7125	-0.7125	-0.7125	-0.7125	-0.7125	-0.5982	-0.5696	-0.5696	-0.5696	-0.5696	-0.5696	-0.5696	-0.5696	-0.5696	-0.5696	-0.5696		-0.7131	-0.7131
YBR035C	PDX3												-1.3735	-1.3735	-1.3735	-1.3735	-1.3735	-1.3735	-1.3735	-1.3735	-1.3735	-1.3735	-1.3735	-1.3735	-1.3735	-1.3735	-1.3735	-1.3735	-1.3236	-0.9244	-0.9244	-0.9244	-0.9244	-0.9244	-0.9244	-0.9244	-0.9244	-0.9244	-0.9244
YJR118C	ILM1	0.2422	0.2422	0.2422	0.2422	0.2422								-0.4592	-0.4592	-0.4592	-0.4592	-0.4592	-0.4592	-0.4592	-0.4592	-0.4592	-0.4592	-0.4592	-0.4592	-0.4592		-0.0702	-0.0702	-0.0702	-0.0702	-0.0702	-0.0702	-0.0702	-0.0702	-0.0702	-0.0702	-0.0702	-0.0702
YDL121C				0.3157	0.3157	0.3157	0.3157	0.3157	0.3157	0.3157	0.3157	0.3157	0.3157	0.3157	0.3157	0.2783	0.2633	0.2633	0.2633	0.2633	0.2633	0.2633	0.2633	0.2633	0.2633	0.2633	0.2633	0.2633	0.2633	0.2633	0.2633	0.2633
YBL102W	SFT2	0.1835	0.1835	0.1835	0.1835	0.1835	0.1835	0.1835	0.1835	0.1835							-0.131	-0.131	-0.131	-0.131	-0.131	-0.131	-0.131	-0.131	-0.131	-0.131	-0.131	-0.131	-0.131	-0.131	-0.131	-0.131	-0.131	-0.131														0.0769	0.0769
YOL105C	WSC3	-0.369	-0.206	0.4461	0.4461	0.4461	0.4461	0.4461	0.4461	0.4461	0.4461	0.4461	0.4461	0.4461	0.4461	0.4461	0.4461											0.1219	0.1219	0.1219	0.1219	0.1219	0.1219	0.1219	0.1219	0.1219	0.1219	0.1219	0.1219	0.1219	0.1219	0.1219	0.1219	0.1219	0.1219	-0.3602	-0.3602	-0.3602	-0.3602
YKL146W	AVT3	-0.4626												-1.0689	-1.0689	-1.0689	-1.0689	-1.0689	-1.0689	-1.0689	-1.0689	-1.0689	-1.0689	-1.0689	-1.0689	-1.0689	-1.0689	-0.4236	-0.4236	-0.4236	-0.4236	-0.4236	-0.4236	-0.4236	-0.4236	-0.4236	-0.5606	-0.8804	-0.8804	-0.8804	-0.8804	-0.8804	-0.8804	-0.8804	-0.8804	-0.8804	-0.8804	-0.8804	-0.8804
YDR018C		-0.1442	-0.1442	-0.1442	-0.1442	-0.1442	-0.1442	-0.1442	-0.1442	-0.0997	-0.0552	-0.0552	-0.0552	-0.0552	-0.0552	-0.0552	-0.0552	-0.0552	-0.0552	-0.0552	-0.0552																							-0.0434	-0.0434	-0.0434	-0.0434	-0.0434	-0.0434
YER053C	PIC2																								-1.0825	-1.0825	-1.0825	-1.0825	-1.0825	-1.0825	-1.0825	-1.0825	-1.0825	-1.0825	-1.0825	-1.0825	-1.0825	-1.0825	-1.0825	-1.0825	-1.0825	-1.0825
YMR149W	SWP1		-0.4286	-0.4286	-0.4286	-0.4286	-0.4286	-0.4286	-0.4286	-0.4286	-0.4286	-0.4286	-0.4286	-1.3602	-1.3602	-1.3602	-1.3602	-1.3602	-1.3602	-1.3602	-1.3602	-1.3602	-1.3602	-1.3602	-1.1345	-0.608	-0.608	-0.608	-0.608	-0.608	-0.608	-0.608	-0.608	-0.608	-0.608	-0.608	-0.608
YOR242C	SSP2	-0.5748	-0.5748	-0.5748	-0.5748	-0.5748	-0.5748	-0.5748	-0.5748	-0.5748	-0.5748	-0.742	-0.742	-0.742	-0.742	-0.742	-0.742	-0.742	-0.742	-0.742	-0.742	-0.742	-0.742					-0.2174	-0.2174	-0.2174	-0.2174	-0.2174	-0.2174	-0.2174	-0.2174	-0.2174	-0.2174	-0.2174
YDR096W	GIS1	-1.0922	-1.0922	-1.0922	-1.0922	-1.0922	-1.0922	-1.0922	-1.0922	-1.0922																										-1.2913	-1.2913	-1.2913	-1.2913	-1.2913	-1.2913	-1.2913	-1.2913	-1.2913	-1.2913	-1.2913	-1.2913	-1.2913	-1.2913
YNL125C	ESBP6	-0.6067	-0.6067	-0.6067	-0.6067												-0.4898	-0.4898	-0.4898	-0.4898	-0.4898	-0.4898	-0.4898	-0.4898	-0.4898	-0.4898	-0.4898	-0.4898	-0.4898	-0.4898	-0.4898	-0.4898	-0.4898													-1.2603	-1.2603	-1.2603	-1.2603
YLR316C	TAD3	1.3392	1.3392	1.3392	1.3392	1.3392	0.779	0.2189	0.2189	0.2189	0.2189	0.2189	0.2189	0.2189	0.2189	0.2189	0.2189	0.2189	0.2189	0.2189	0.2189	-0.0587	-0.0587	-0.0587	-0.0587	-0.0587	-0.0587	-0.0587	-0.0587	-0.0587	-0.0587	-0.0587	-0.0587
YOL019W-A																																				-1.5918	-1.5918	-1.5918	-1.5918	-1.5918	-1.5918	-1.5918	-1.5918	-1.5918	-1.5918	-1.5918	-1.5918	-1.5918	-1.5918
YEL039C	CYC7	-0.4834	-0.4834	-0.4834	-0.4834	-0.4834	-0.4834	-0.4834	-0.4834	-0.4834	-0.4834	-0.4834	-0.4834	-0.2581	-0.213	-0.213	-0.213	-0.213	-0.213	-0.213	-0.213	-0.213	-0.213	-0.213	-0.213	-0.213	-0.213	-0.213	-0.213	-0.213	-0.213																0.2466	0.2466	0.2466
YPL240C	HSP82									-0.5061	-0.5061	-0.5061	-0.5061	-0.5061	-0.5061	-0.5061	-0.5061	-0.5061	-0.5061	-0.5061	-0.5061																							-0.6909	-0.6909	-0.6909	-0.6909	-0.6909	-0.6909
YLL014W		-0.553	-0.553	-0.553	-0.553	-0.553	-0.553	-0.553	-0.553	-0.553	-0.553	-0.553						0.1172	0.1172	0.1172	0.1172	0.1172	0.1172	0.1172	0.1172	0.1172	0.1172	0.1172	0.1172																		0.0193	0.0193	0.0193
YMR265C		-0.0993	-0.0993	-0.0993	-0.0993	-0.0993	-0.0993	-0.0993	-0.0993	-0.0993	-0.0993	-0.0993	-0.0993	-0.0993	-0.0993					-0.6937	-0.6937	-0.6937	-0.6937	-0.6937	-0.6937	-0.6937	-0.6937	-0.6937	-0.6937	-0.6937	-0.6937	-0.6937	-0.6696	-0.6696	-0.6696	-0.6696	-0.6696	-0.6696	-0.6696	-0.6696	-0.4873	-0.4092	-0.4092	-0.4092	-0.4092	-0.4092	-0.4092	-0.4092	-0.4092
YER091C	MET6																														-0.3217	-0.3217	-0.3217	-0.3217	-0.3217	-0.3217	-0.3217	-0.3217	-0.3217	-0.3217	-0.3217	-0.3217
YPR139C	VPS66	0.7139	0.7139	0.7139	0.7139	0.1347	0.1347	0.1347	0.1347	0.1347	0.1347	0.1347	0.1347	0.1347	0.1347	0.1347	0.1347	0.1347	0.1347	0.1347	0.1347	0.1347	0.1347
YMR181C		-0.4986	-0.4986	-0.4986	-0.4986	-0.4986	-0.4986	-0.4986	-0.4986	-0.4986	-0.4986						-0.2008	-0.2008	-0.2008	-0.2008	-0.2008	-0.2008	-0.2008	-0.2008	-0.2008	-0.2008	-0.2008	-0.2008	-0.2008	-0.2008	-0.2008	-0.2008	-0.2008	-0.2008	-0.593	-0.593	-0.593	-0.593	-0.593	-0.593	-0.593	-0.593	-0.593	-0.593	-0.5684	-0.5656	-0.5656	-0.5656	-0.5656
YLR435W	TSR2	-0.0416	-0.0416	-0.0416	-0.0416	-0.0416	-0.0416	-0.0416	-0.0416	-0.0416							0.2998	0.2998	0.2998	0.2998	0.2998	0.2998	0.2998	0.2998	0.2998	0.2998	0.2998	0.2998	0.2998	0.2998																		-0.0717	-0.0717
YEL066W	HPA3	-0.008	-0.008	-0.008	-0.008	-0.008	0.4857	0.4857	0.4857	0.4857	0.4857	0.4857	0.4857	0.4857	0.4857	0.4857	0.4857	0.4857	0.4857	0.4857	0.4857	0.4857	0.4857	0.4438	0.4438	0.4438	0.4438	0.4438	0.4438	0.4438	0.4438	0.4438	0.4438	0.4438	0.4438	0.4438	0.4438	0.4438	0.4438	0.4438	0.4438				-0.3425	-0.3425	-0.3425	-0.3425	-0.3425
YIL014C-A					0.0653	0.0653	0.0653	0.0653	0.0653	0.0653	0.0653	0.0653	0.0653	0.0653	0.0653	0.0653	0.0653	0.0653	0.0653	0.0653	0.0653																											-0.9294	-0.9294
YNL122C		-0.7811	-0.5656	-0.5656	-0.5656	-0.5656	-0.5656	-0.5656	-0.5656	-0.5656	-0.5656	-0.5656	-0.5656								-0.725	-0.725	-0.725	-0.725	-0.725	-0.725	-0.725	-0.725	-0.725	-0.725	-0.725
YDL053C	PBP4			-0.2524	-0.2524	-0.2524	-0.2524	-0.2524	-0.2524	-0.2524	-0.2524	-0.2524	-0.2524	-0.2524	-0.2524	-0.2524	-0.2524	-0.2524	-0.2524	-0.2524	-0.2524	-0.2524
YPR002W	PDH1			-0.5233	-0.5233	-0.5233	-0.5233	-0.5233	-0.5233	-0.5233	-0.5233	-0.5233	-0.5233	-0.5233	-0.5233	-0.5233																						-0.3831	-0.3831	-0.3831	-0.3831	-0.3831	-0.3831	-0.3831	-0.3831	-0.3831	-0.3831	-0.3831	-0.3831
YBL095W		-0.1679	-0.1679	-0.1679	-0.1679	-0.1679	-0.1679	-0.1679	-0.1679	-0.1679							0.0933	0.0933	0.0933	0.0933	0.0933	0.0933	0.0933	0.0933	0.0933	0.0933	0.0933	0.0933	0.0933				-0.9347	-0.9347	-0.9347	-0.9347	-0.9347	-0.9347	-0.9347	-0.9347	-0.9347	-0.9347	-0.9347
YGR038W	ORM1	-0.7289	-0.7289	-0.7289	-0.7289	-0.7289	-0.7289	-0.7289	-0.7289	-0.7289		-0.2107	-0.2107	-0.2107	-0.2107	-0.2107	-0.2107	-0.2107	-0.2107	-0.2107	-0.2107	-0.2107	-0.2107	-0.2107	-0.8964	-0.8964	-0.8964	-0.8964	-0.8964	-0.8964	-0.8964	-0.8964	-0.8964	-0.8964	-0.8964	-0.8964	-0.8964	-0.8964	-0.8964	-0.8964	-0.8964					-0.3742	-0.3742	-0.3742	-0.3742
YLL027W	ISA1																																														-0.0702	-0.0702	-0.0702
YDR383C	NKP1																													-0.9294	-0.9294	-0.9294	-0.9294	-0.9294	-0.9294	-0.9294	-0.9294	-0.9294	-0.9294	-0.9294
YPR028W	YOP1																								-0.9807	-0.9807	-0.9807	-0.9807	-0.9807	-0.9807	-0.9807	-0.9807	-0.9807	-0.9807	-0.3904	-0.3904	-0.3904	-0.3904	-0.3904	-0.3904	-0.3904	-0.3904	-0.3904	-0.3904	-0.3904	-0.3354	-0.1152	-0.1152	-0.1152
YIL148W	RPL40A	0.4813	0.4813	0.4813	0.4813	0.4813	0.4813	0.4813	0.4813					0.4438	0.4438	0.4438	0.4438	0.4438	0.4438	0.4438	0.4438	0.4438	0.4438	0.4438	0.4438	0.4438	0.4438	0.4438	0.4438	0.4438	0.4438	0.4438
YNL217W		-0.2916	-0.2916	-0.2916	-0.2916	-0.2916	-0.2916	-0.9067	-0.9067	-0.9067	-0.9067	-0.9067	-0.9067	-0.9067	-0.9067	-0.9067	-0.9067	-0.9067	-0.9067	-0.9067	-0.9067	-0.9067	-0.9067	-0.9067	-0.9067	-0.9067																		-0.534	-0.534	-0.534	-0.534	-0.534	-0.534
YDL075W	RPL31A	-0.3217	-0.3217	-0.3217	-0.3217
YMR135C	GID8	-1.2786	-1.2786	-1.2786	-1.2786	-1.2786	-1.2786	-1.2786
YBR006W	UGA2	-0.0416	-0.0416	-0.0416	-0.0416	-0.0416	-0.0416	-0.0416	-0.0416	-0.0416	-0.0416	-0.0416				-0.1911	-0.1911	-0.1911	-0.1911	-0.1911	-0.1911	-0.1911	-0.1911	-0.1911	-0.1911	-0.1911	-0.1911	-0.1911	-0.1911	-0.1911	-0.1911	-0.1911	-0.1911						-0.9294	-0.9294	-0.9294	-0.9294	-0.9294	-0.9294	-0.9294	-0.9294	-0.9294	-0.9294	-0.9294
YJR072C	NPA3	0.4066	0.4066	0.4066	0.4066	0.4066	0.4066	0.4066	0.4066	0.4066	0.1947	0.1947	0.1947	0.1947	0.1947	0.1947	0.1947	0.1947	0.1947	0.1947	0.1947	0.1947	0.1947	0.1947	0.0305	0.0031	0.0031	0.0031	0.0031	0.0031	0.0031	0.0031	0.0031	0.0031	0.0031	0.0031	0.0031	0.0031	0.0031	0.0031
YPR172W		0.2377	0.2377	0.2377	0.2377	0.2377	0.2377	0.2377	0.2377	-0.3711	-0.5233	-0.5233	-0.5233	-0.5233	-0.5233	-0.5233	-0.5233	-0.5233	-0.5233	-0.5233	-0.5233	-0.5233		0.2633	0.2633	0.2633	0.2633	0.2633	0.2633	0.2633	0.2633	0.2633	0.2633	0.2633	0.2633		-0.3723	-0.3723	-0.3723	-0.3723	-0.3723	-0.3723	-0.3723	-0.3723	-0.3723	-0.3723
YJL192C	SOP4	-0.3783	-0.3783	-0.3783	-0.3783	-0.3783
YIL052C	RPL34B	-0.4852	-0.4852	-0.4852
YGL121C	GPG1	-0.5668	-0.5668	-0.5668	-0.5668	-0.5668	-0.5668														0.3122	0.3122	0.3122	0.3122	0.3122	0.3122	0.3122	0.3122	0.3122	0.3122	0.3122	0.3122	0.3122	0.3122						-0.8727	-0.8727	-0.8727	-0.8727	-0.8727	-0.8727	-0.8727	-0.8727	-0.8727	-0.8727
YDR047W	HEM12
YHR060W	VMA22	0.1273	0.1273	0.1273	0.1273	0.1273	0.1273	0.1273	0.1273	0.1273	0.1273							0.6632	0.6632	0.6632	0.6632	0.6632	0.6632	0.6632	0.6632	0.6632	0.6632	0.6632	0.6632	0.6632	0.6632						0.7735	0.7735	0.7735	0.7735	0.7735	0.7735	0.7735	0.7735	0.7735	0.7735	0.7735	0.7735	-0.0289
YDR524C	AGE1																																																0.2019
YAL013W	DEP1	0.2518	0.2518	0.2518	0.2518	0.4052	0.4222	0.4222	0.4222	0.4222	0.4222	0.4222	0.4222	0.4222	0.4222	0.4222	0.4222	0.4222	0.3044	0.1866	0.1866	0.1866	0.1866	0.1866	0.1866	0.1866	0.1866	0.1866	0.1866	0.1866	0.1866	0.1866	0.1866	0.1866	0.1866	0.1866											-0.1527	-0.1527	-0.1527
YJR133W	XPT1	-0.7367	-0.7367		-0.387	-0.387	-0.387	-0.387	-0.387	-0.387	-0.387	-0.387	-0.387	-0.387	-0.387	-0.387	-0.387	-0.387	-0.387	-0.387	-0.2062	-0.0856	-0.0856	-0.0856	-0.0856	-0.0856	-0.0856	-0.0856	-0.0856	-0.0856	-0.4458	-0.5358	-0.5358	-0.5358	-0.5358	-0.5358	-0.5358	-0.5358	-0.5358	-0.5358									-0.9258
YER177W	BMH1	-0.9591	-0.9591	-0.9591	-0.9591	-0.9591
YJL130C	URA2
YGR175C	ERG1	-1.1201	-1.1201	-1.1201	-1.1201	-1.1201	-1.1201	-1.1201	-1.1706	-1.2043	-1.2043	-1.2043	-1.2043	-1.2043	-1.2043	-1.2043	-1.2043	-1.2043	-1.2043	-1.2043	-1.2043	-1.2043						-1.4737	-1.4737	-1.4737	-1.4737	-1.4737	-1.4737	-1.4737	-1.4737	-1.4737	-1.4737	-1.4737	-1.4737	-1.4737	-1.4737	-1.4737	-1.4737	-1.4737
YLR372W	SUR4	-0.1697	-0.1697	-0.1697	-0.1697	-0.1693	-0.1656	-0.1656	-0.1656	-0.1656	-0.1656	-0.1656	-0.1656	-0.1656	-0.1656	-0.1656
YCL010C	SGF29	-0.5544	-0.5547	-0.5547	-0.5547	-0.5547	-0.5547	-0.5547	-0.5547	-0.5547	-0.5547	-0.5547	-0.5547	-0.5547	-0.5547	-0.5547	-0.5547	-0.5547	-0.5547			-0.9666	-0.9666	-0.9666	-0.9666	-0.9666	-0.9666	-0.9666	-0.9666	-0.9666	-0.9666	-0.9666	-0.9666	-0.9666	-0.9666	-0.9666
YOR286W		-0.4342	-0.4342	-0.4342	-0.4342	-0.4342	-0.4342	-0.4342	-0.4342	-0.4342	-0.4342	-0.4342	-0.4342	-0.4342	-0.4342	-0.4342	-0.4342	-0.4342	-0.5885	-0.5885	-0.5885	-0.5885	-0.5885	-0.5885	-0.5885	-0.5885	-0.5885	-0.5885	-0.5885	-0.4286	-0.4286	-0.4286	-0.4286	-0.4286	-0.4286	-0.4286	-0.4286	-0.4286	-0.4286										-0.7705
YKR014C	YPT52	0.6352	0.6352	0.6352	0.6352	0.6352	0.4834	-0.2759	-0.2759	-0.2759	-0.2759	-0.2759	-0.2759	-0.2759	-0.2759	-0.2759	-0.2759											-0.0247	-0.0247	-0.0247	-0.0247	-0.0247	-0.0247	-0.0247	-0.0247	-0.0247	-0.0247	0.5026	0.6783	0.6783	0.6783	0.6783	0.6783	0.6783	0.6783	0.6783	0.6783	0.6783	-0.6497
YGR088W	CTT1	-0.5609	-0.5609	-0.5609	-0.5609	-0.5609	-0.5609	-0.5609	-0.5609		-0.3661	-0.3661	-0.3661	-0.3661	-0.3661	-0.3661	-0.3661	-0.3661	-0.3661	-0.3661	-0.2957	-0.2957	-0.2957	-0.2957	-0.2957	-0.2957	-0.2957	-0.2957	-0.2957	-0.2957	-0.2957	-0.2957	-0.2957	-0.2957	-0.2957	-0.2957	-0.2957	-0.2245	0.0602	0.0602	0.0602	0.0602	0.0602	0.0602	0.0602	0.0602	0.0602	0.0602	0.0602
YJL166W	QCR8	-0.5985	-0.5985	-0.5985	-0.5985	-0.5985	-0.5985	-0.5985	-0.5985					-0.4133	-0.4133	-0.4133	-0.4133	-0.4133	-0.4133	-0.4133	-0.4133	-0.4133	-0.4133	-0.4133	-0.4133	-0.4133	-0.4133	-0.4133	-0.4133	-0.4133	-0.4133																		-0.6925
YPR102C	RPL11A	0.2495	0.2495	0.2495	0.2495	0.2495	0.2495	0.2495	0.2495	0.2495
YBL078C	ATG8	-0.2931	-0.2931	-0.2931	-0.2931	-0.2931	-0.2931	-0.2931	-0.2931	-0.6029	-0.7578	-0.7578	-0.7578	-0.7578	-0.7578	-0.7578	-0.7578	-0.7578	-0.7578											0.2633	0.2633	0.2633	0.2633	0.2633	0.2633	0.2633	0.2633	0.2633	0.2633
YDR032C	PST2	-0.8873	-0.8873	-0.8873	-0.8873									-0.522	-0.522	-0.522	-0.522	-0.522	-0.522	-0.522	-0.522	-0.522	-0.522	-0.522	-0.522	-0.522	-0.522	-0.522	-0.522	-0.522										-0.6436	-0.6436	-0.6436	-0.6436	-0.6436	-0.6436	-0.6436	-0.6436	-0.6436	-0.6436
YPL171C	OYE3	-0.2186	-0.2186	-0.2186	-0.2186	-0.2186	-0.2186	-0.2186	-0.2186	-0.2186	-0.2186	-0.2186	-0.3171	-0.4403	-0.4403	-0.4403	-0.4403	-0.4403	-0.4403	-0.4403	-0.4403	-0.4403	-0.4403					-0.6696	-0.6696	-0.6696	-0.6696	-0.6696	-0.6696	-0.6696	-0.6696	-0.6696	-0.6696	-0.6696	-0.6696	-0.6696	-0.6696	-0.6696	-0.6696
YOR115C	TRS33	-0.3957	-0.2952	-0.2952	-0.2952	-0.2952	-0.2952	-0.2952	-0.2952	-0.2952	-0.2952	-0.2952	-0.2952	-0.2952	-0.2952	-0.2952	-0.2952	-0.2952	-0.2952	0.0933	0.0933	0.0933	0.0933	0.0933	0.0933	0.0933	0.0933	0.0933	0.0933	0.0933	0.0933																		-0.6366
YDL021W	GPM2	-0.4973	-0.4973	-0.4973	-0.4973	-0.4973	-0.4973	-0.4973	-0.4973	-0.4973			-0.3217	-0.3217	-0.3217	-0.3217	-0.3217	-0.3217	-0.3217	-0.3217	-0.3217	-0.3217	-0.3217	-0.3217	-0.3217	-0.3217	-0.3217	-0.3217	0.2434	0.3564	0.3564	0.3564	0.3564	0.3564	0.3564	0.3564	0.3564	0.3564	0.3564	0.3564	0.3564
YGR240C	PFK1			-1.4809	-1.4809	-1.4809	-1.4809	-1.4809	-1.4809	-1.4809	-1.4809	-1.4809	-1.4809	-1.4809	-1.4809	-1.4809	-1.4809	-1.4809	-1.4809
YDL135C	RDI1											-0.0236	-0.0236	-0.0236	-0.0236	-0.0236	-0.0236	-0.0236	-0.0236	-0.0236	-0.0236	-0.0236																-0.8836	-0.8836	-0.8836	-0.8836	-0.8836	-0.8836	-0.8836	-0.8836	-0.8836	-0.8836	-0.8836	-0.8836
YDR533C	HSP31	-0.6587	-0.6587	-0.6587	-0.6587	-0.6587	-0.6587	-0.6587	-0.6587	-0.6587	-0.6587														-0.4737	-0.4737	-0.4737	-0.4737	-0.4737	-0.4737	-0.4737	-0.4737	-0.4737	-0.4737	-0.4737	-0.4737	-0.4737	-0.4737										-0.7036	-0.7036
YOR065W	CYT1	-0.3768	-0.3768	-0.3768	-0.3768	-0.3768	-0.3768	-0.5101	-0.5101	-0.5101	-0.5101	-0.5101	-0.5101	-0.5101	-0.5101	-0.5101	-0.5101	-0.5101	-0.5101	-0.5101	-0.5101																									-0.5847	-0.5847	-0.5847	-0.5847
YNL075W	IMP4	-0.4822	-0.4822	-0.4822	-0.4822	-0.4822	-0.4822	-0.4822	-0.4822	-0.4822	-0.4822	-0.4822	-0.4822	-0.4822	-0.4822	-0.4822	-0.4822	-0.4822	-0.4822		-0.1173	-0.1173	-0.1173	-0.1173	-0.1173	-0.1173	-0.1173	-0.1173	-0.1173	-0.1173
YDL191W	RPL35A			-0.3592	-0.3592	-0.3592	-0.3592	-0.3592	-0.3592	-0.3592	-0.3592	-0.3592	-0.3592		-0.7578	-0.7578	-0.7578	-0.7578	-0.7578	-0.7578	-0.7578	-0.7578	-0.7578	-0.7578
YMR136W	GAT2	-1.2786	-1.2786	-1.2786	-1.2786	-1.2786	-1.2786	-1.2786	-1.2786	-1.2786	-1.2786																	-0.7367	-0.7367	-0.7367	-0.7367	-0.7367	-0.7367	-0.7367	-0.7367	-0.7367	-0.7367	-0.7367	-0.7367
YPR152C	URN1	-0.4115	-0.4115	-0.4115				-0.2373	-0.2373	-0.2373	-0.2373	-0.2373	-0.2373	-0.2373	-0.2373	-0.2373	-0.2373	-0.2373	-0.2373	-0.2373	-0.2373	-0.2373	-0.2156	-0.1939	-0.1939	-0.1939	-0.1939	-0.1939	-0.1939	-0.1939	-0.1939	-0.1939	-0.1939	-0.1939	-0.1939	-0.1939	-0.1939	-0.1939	-0.1939										0.0117
YJL160C																													-0.9161	-0.9161	-0.9161	-0.9161	-0.9161	-0.9161	-0.9161	-0.9161	-0.9161	-0.9161	-0.9161	-0.9161	-0.9161	-0.9161
YBR137W		-0.6843	-0.6843	-0.6843	-0.6843	-0.6843	-0.6843	-0.6843	-0.6843	-0.6843	-0.6843							-0.6213	-0.6213	-0.6213	-0.6213	-0.6213	-0.6213	-0.6213	-0.6213	-0.6213	-0.6213	-0.6213	-0.6213	-0.4916	-0.4916	-0.4916	-0.4916	-0.4916	-0.4916	-0.4916	-0.4916	-0.4916	-0.4916	-0.4916
YNL014W	HEF3	-0.4212	-0.4212	-0.4212	-0.4212	-0.4212	-0.4212	-0.4212	-0.4212	-0.4212				-0.3497	-0.3497	-0.3497	-0.3497	-0.3497	-0.3497	-0.3497	-0.3497	-0.3497	-0.3497	-0.3497	-0.3497	-0.3497	-0.3497	-0.3497	-0.3497	-0.1152	-0.1152	-0.1152	-0.1152	-0.1152	-0.1152	-0.1152	-0.1152	-0.1152	-0.1152	-0.1152	-0.1152	-0.6154	-0.6154	-0.6154	-0.6154	-0.6154	-0.6154	-0.6154	-0.6154
YBL015W	ACH1	-0.3497	-0.3497	-0.3497	-0.3497								0.0153	0.0153	0.0153	0.0153	0.0153	0.0153	0.0153	0.0153	0.0153	0.0153	0.0153	-0.8501	-0.9738	-0.9738	-0.9738	-0.9738	-0.9738	-0.9738	-0.9738	-0.9738	-0.9738	-0.9738	-0.9738	-0.9738	-0.9738	-0.9738	-0.9738	-0.9738	-0.7634	-0.7634	-0.7634	-0.7634	-0.7634	-0.7634	-0.7634	-0.7634	-0.7634
YOR384W	FRE5	-0.1622	-0.1622	-0.1622	-0.1622	-0.1622	-0.1622	-0.1622	-0.1622	-0.1622	-0.1622	-0.1622	-0.1622		-0.1353	-0.1353	-0.1353	-0.1353	-0.1353	-0.1353	-0.1353	-0.1353	-0.1353	-0.1353			0.1478	0.1478	0.1478	0.1478	0.1478	0.1478	0.1478	0.1478	0.1478	0.1478	-0.4678	-0.714	-0.714	-0.714	-0.714	-0.714	-0.714	-0.714	-0.714	-0.714	-0.714	-0.714	-0.714
YJR144W	MGM101	0.2875	0.2875	0.2875										0.4332	0.4332	0.4332	0.4332	0.4332	0.4332	0.4332	0.4332	0.4332	0.4332	0.4332	0.4332	0.4332	0.1334	0.0734	0.0734	0.0734	0.0734	0.0734	0.0734	0.0734	0.0734	0.0734	0.0734	0.0734
YHL042W		0.0732	0.0732	0.0732	-0.4372	-0.4372	-0.4372	-0.4372	-0.4372	-0.4372	-0.4372	-0.4372	-0.4372	-0.4372	-0.4372				-0.3761	-0.3761	-0.3761	-0.3761	-0.3761	-0.3761	-0.3761	-0.3761	-0.3761	-0.3761	-0.3761	-0.3761	-0.3761	-0.3761								-0.3742	-0.3742	-0.3742	-0.3742	-0.3742	-0.3742	-0.3742	-0.3742	-0.3742	-0.3742
YDR265W	PEX10	0.2633	0.2633	0.2633	0.2633	0.2633	0.2633	0.2633	0.2633	0.2633	0.2633	0.2633	0.2633	0.2633	0.2633	0.2633	0.4153	0.4153	0.4153	0.4153	0.4153	0.4153	0.4153	0.4153	0.4153	0.4153	0.4153									-0.0993	-0.0993	-0.0993	-0.0993	-0.0993	-0.0993	-0.0993	-0.0993	-0.0993	-0.0993	-0.0993	-0.0993	-0.0993	-0.1186
YGR087C	PDC6															-0.7222	-0.7222	-0.7222	-0.7222	-0.7222	-0.7222	-0.7222	-0.7222	-0.7222	-0.7222	-0.7222	-0.7222	-0.7222	-0.7222	-0.7222									-0.1766	-0.1766	-0.1766	-0.1766	-0.1766	-0.1766	-0.1766	-0.1766	-0.1766	-0.1766	-0.1766
YOR026W	BUB3	-0.0861	-0.0861	-0.0861	-0.0861	-0.0861	-0.0861	-0.0861	-0.0861							-0.3217	-0.3217	-0.3217	-0.3217	-0.3217	-0.3217	-0.3217	-0.3217	-0.3217	-0.3217	-0.3217	-0.3217	-0.3217	-0.3217				-0.4592	-0.4592	-0.4592	-0.4592	-0.4592	-0.4592	-0.4592	-0.4592	-0.4592	-0.4592	-0.4592	-0.4592
YBR278W	DPB3	0.3373	0.3373	0.3373	0.3373	0.3373	0.3373	0.3373	0.3373	-0.1602	-0.1602	-0.1602	-0.1602	-0.1602	-0.1602	-0.1602	-0.1602	-0.1602	-0.1602	-0.1602	-0.1602	-0.1602	-0.1602	-0.1602	0.0223	0.2961	0.2961	0.2961	0.2961	0.2961	0.2961	0.2961	0.2961	0.2961	0.2961													-0.1697	-0.1697
YDR100W	TVP15	-0.2869	-0.2869	-0.2869	-0.2869	-0.2869																					-0.3761	-0.3761	-0.3761	-0.3761	-0.3761	-0.3761	-0.3761	-0.3761	-0.3761	-0.3761	-0.3761	-0.3761	-0.3761	-0.3761	-0.3761	-0.3761	-0.3761	-0.3761	-0.3761				-0.0587
YJL133C-A																														-0.8192	-0.8192	-0.8192	-0.8192	-0.8192	-0.8192	-0.8192	-0.8192	-0.8192	-0.8192	-0.8192	-0.8192	-0.8192	-0.8192		-0.593	-0.593	-0.593	-0.593	-0.593
YBR005W	RCR1	-0.7222	-0.7222	-0.7222	-0.7222		0.7745	0.7745	0.7745	0.7745	0.7745	0.7745	0.7745	0.7745	0.7745	0.7745	0.7745	0.7745	0.7745	0.7745					-0.2222	-0.2222	-0.2222	-0.2222	-0.2222	-0.2222	-0.2222	-0.2222	-0.2222	-0.2222	-0.2222	-0.2222	-0.2222	-0.2222	-0.2222	-0.2222
YEL011W	GLC3							-0.4019	-0.4019	-0.4019	-0.4019	-0.4019	-0.4019	-0.4019	-0.4019	-0.4019	-0.4019	-0.4019	-0.4019	-0.4019	-0.4019	-0.4019	-0.4019	-0.2177	-0.1388	-0.1388	-0.1388	-0.1388	-0.1388	-0.1388	-0.1388	-0.1388	-0.1817	-0.1924	-0.1924	-0.1924	-0.1924	-0.1924	-0.1924	-0.1924	-0.1924	-0.1924	-0.1924	-0.1924	-0.1924	-0.1924	-0.1924	-0.1924	-0.1924
YIL057C		-1.7912	-1.7912	-1.7912	-1.7912	-1.7912	-1.7912	-1.7912	-1.7912	-1.7912	-1.7912	-1.7912	-1.7912	-1.7912																																			-1.369
YPR074C	TKL1	-1.4128	-1.4128	-1.4128	-1.4128	-1.4128	-1.4128	-1.4128	-1.4128	-1.4128	-1.4128	-1.4128	-1.4128	-1.4128	-1.4128	-1.4128	-1.4128	-1.4128	-1.4128
YML058W	SML1	-0.1461	-0.1461	-0.1461	-0.1461	-0.1461	-0.6816	-0.6816	-0.6816	-0.6816	-0.6816	-0.6816	-0.6816	-0.6816	-0.6816	-0.6816	-0.6816	-0.6816	-0.6816	-0.6816
YHR034C	PIH1	0.1686									0.11	0.11	0.11	0.11	0.11	0.11	0.11	0.11	0.11	0.11	0.11	0.11	0.11	0.2164	0.2377	0.2377	0.2377	0.2377	0.2377	0.2377	0.2377	0.2377	0.2377	0.2377	0.2377	0.2377	0.2377	0.2377	0.2377	0.2377	0.2377								0.1501
YDR447C	RPS17B	0.5575	0.5575	0.5575	0.5575	0.5575	0.5575	0.5575	0.5575	0.5575
YBR252W	DUT1	-0.3592	-0.3592	-0.3592	-0.3592	-0.3592	-0.3592	-0.3592	-0.3592					-0.106	-0.106	-0.106	-0.106	-0.106	-0.106	-0.106	-0.106	-0.106	-0.106	-0.106																								-0.3332	-0.3332
YDL069C	CBS1	0.2377	0.2377	0.2377	-0.0907	-0.2315	-0.2315	-0.2315	-0.2315	-0.2315	-0.2315	-0.2315	-0.2315	-0.2315	-0.2315	-0.2315	-0.2315	-0.2315	-0.2315	-0.2315	-0.1363	0.2447	0.2447	0.2447	0.2447	0.2447	0.2447	0.2447	0.2447	0.2447	0.2447	0.2447	0.3299	0.3664	0.3664	0.3664	0.3664	0.3664	0.3664	0.3664	0.3664	0.3664	0.3664	0.3664
YJR094C	IME1	-0.2235	-0.2235	-0.2235	-0.2235	-0.2235	-0.2235	-0.2235	-0.2235	-0.0191	-0.0191	-0.0191	-0.0191	-0.0191	-0.0191	-0.0191	-0.0191	-0.0191	-0.0191	-0.0191	-0.0191	-0.0191				-0.0221	-0.0221	-0.0221	-0.0221	-0.0221	-0.0221	-0.0221	-0.0221	-0.0221	-0.0221	-0.0221	-0.0221
YDR056C		-0.0479	-0.0479	-0.0479									-0.0829	-0.0829	-0.0829	-0.0829	-0.0829	-0.0829	-0.0829	-0.0829	-0.0829	-0.0829	-0.0829	-0.0829	-0.0829	-0.0829	-0.0829	-0.0829	-0.0829	0.0933	0.0933	0.0933	0.0933	0.0933	0.0933	0.0933	0.0933	0.0933	0.0933	0.0933	0.0933	0.0933	0.0933	0.0933	0.0933	0.0933	0.0933
YPL038W	MET31	0.1297	0.1297	0.1297	0.2153	0.2153	0.2153	0.2153	0.2153	0.2153	0.2153	0.2153	0.2153	0.2153
YJL003W	COX16	-0.7547	-0.7547	-0.7547	-0.7547	-0.7547	-0.7547	-0.7547	-0.7547	-0.7547	-0.29	-0.29	-0.29	-0.29	-0.29	-0.29	-0.29	-0.29	-0.29	-0.29	-0.29	-0.29	-0.29	-0.29																					-0.9221	-0.9221	-0.9221	-0.9221	-0.9221
YIL116W	HIS5	-1.3093	-1.7202	-1.7202	-1.7202	-1.7202	-1.7202	-1.7202	-1.7202	-1.7202	-1.7202	-1.7202	-1.7202	-1.7202	-1.7202	-1.7202	-1.7202
YCR083W	TRX3	0.0002	0.0002	0.0002	0.0002	0.0002	0.0002	0.0002	-0.5813	-0.5813	-0.5813	-0.5813	-0.5813	-0.5813	-0.5813	-0.5813	-0.5813	-0.5813	-0.5813	-0.5813	-0.5813	-0.5813	-0.5813	-0.5813	-0.5813	-0.5813		-0.7238	-0.7238	-0.7238	-0.7238	-0.7238	-0.7238	-0.7238	-0.7238	-0.7238	-0.7238	-0.7238	-0.7238	-0.7238	-0.7238	-0.7238	-0.7238	-0.7238	-0.7238
YOL048C		0.6856	0.6856	0.6856	0.6856	0.6856	0.6856	0.6856	0.6856	0.5318	-0.0835	-0.0835	-0.0835	-0.0835	-0.0835	-0.0835	-0.0835	-0.0835	-0.0835	-0.0835	-0.0835	-0.0835	-0.0835	-0.0835	-0.0835	-0.0835	-0.0835	0.589	0.589	0.589	0.589	0.589	0.589	0.589	0.589	0.589	0.589	0.589
YDR454C	GUK1					-0.1805	-0.1805	-0.1805	-0.1805	-0.1805	-0.1805	-0.1805	-0.1805	-0.1805	-0.1805	-0.1805	-0.1805	-0.1805	-0.1805	-0.1805	-0.1805			-0.7305	-0.7305	-0.7305	-0.7305	-0.7305	-0.7305	-0.7305	-0.7305	-0.7305	-0.7305	-0.7305	-0.7305	-0.7305	-0.7305	-0.7305	-0.7305								-0.2683	-0.2683	-0.2683
YER150W	SPI1	-0.5992	-0.5992	-0.5992	-0.5992	-0.5992	-0.5992	-0.5992	-0.5992	-0.5992	-0.5992	-0.5992	-0.5992	-0.5992																-0.6213	-0.6213	-0.6213	-0.6213	-0.6213	-0.6213	-0.6213	-0.6213	-0.6213	-0.6213	-0.6213	-0.6213		-0.5562	-0.5562	-0.5562	-0.5562	-0.5562	-0.5562	-0.5562
YPR043W	RPL43A					0.6068	0.6068	0.6068	0.6068	0.6068	0.6068	0.6068	0.6068	0.6068	0.6068	0.6068	0.6068	0.6068	0.6068	0.6068	0.6068	0.6068
YDR078C	SHU2	-0.2744	-0.2744	-0.2744	-0.2744	-0.2744	-0.2744	-0.2744	-0.2744	-0.2744	-0.2744							0.0451	0.0451	0.0451	0.0451	0.0451	0.0451	0.0451	0.0451	0.0451	0.0451	0.0451	-0.0469	-0.1388	-0.1388	-0.1388	-0.1388	-0.1388	-0.1388	-0.1388	-0.1388	-0.1388	-0.1388	-0.1388	-0.1388	-0.1388	-0.1388
YGL038C	OCH1	-0.7981	-0.7981	-0.7981	-0.7981	-0.7981		-1.5804	-1.5804	-1.5804	-1.5804	-1.5804	-1.5804	-1.5804	-1.5804	-1.5804	-1.5804	-1.5804																									-0.4852	-0.4852	-0.4852	-0.4852	-0.4852	-0.4852	-0.4852
YPR005C	HAL1	-0.2907	-0.2907	-0.2907	-0.2907	-0.2907	-0.2907	-0.3217	-0.3217	-0.3217	-0.3217	-0.3217	-0.3217	-0.3217	-0.3217	-0.3217	-0.3217	-0.3217	-0.3217	-0.3217	-0.3217	-0.3217	0.0216	0.0216	0.0216	0.0216	0.0216	0.0216	0.0216	0.0216	0.0216	0.0216	0.0216	0.0216	0.0216	0.0216	0.0216	-0.0872	-0.0872	-0.0872	-0.0872	-0.0872	-0.0872	-0.0872	-0.0872	-0.0872	-0.0872	-0.0872	-0.0872
YPL241C	CIN2		-0.0262	-0.0262	-0.0262	-0.0262	-0.0262	-0.0262	-0.0262	-0.0262	-0.0262	-0.0262			-0.7505	-0.7505	-0.7505	-0.7505	-0.7505	-0.7505	-0.7505	-0.7505	-0.7505	-0.7505	-0.7505	-0.7505	-0.7505	-0.7505	-0.7505	-0.7505	-0.7505	-0.7505	-0.7505
YOR306C	MCH5	-0.8147	-0.9807	-1.0221	-1.0221	-1.0221	-1.0221	-1.0221	-1.0221	-1.0221	-1.0221	-1.0221	-1.0221
YER010C		-0.888	-0.888	-0.888	-0.888	-0.888	-0.888	-0.888	-0.888																	0.1536	0.1536	0.1536	0.1536	0.1536	0.1536	0.1536	0.1536	0.1536	0.1536	0.1536	-0.3508	-0.3508	-0.3508	-0.3508	-0.3508	-0.3508	-0.3508	-0.3508	-0.3508	-0.3508	-0.3508
YBR011C	IPP1	0.0245	0.0245	0.478	0.478	0.478	0.478	0.478	0.478	0.478	0.478	0.478	0.478	0.478	0.478	0.478	0.478	0.478		-0.4592	-0.4592	-0.4592	-0.4592	-0.4592	-0.4592	-0.4592	-0.4592	-0.4592	-0.4592	-0.4592	-0.4592	-0.4592	-0.4592	-0.4592	-0.4592	-0.4592
YPL016W	SWI1	-0.1946	-0.1946	-0.1946	-0.1946	-0.1946	-0.1946	-0.1946	-0.1946	-0.1946	-0.1946	-0.1946	-0.1946	-0.1946																																-0.6696	-0.6696	-0.6696	-0.6696
YLR264W	RPS28B															-1.2392	-1.2392	-1.2392	-1.2392	-1.2392	-1.2392	-1.2392	-1.2392	-1.2392	-1.2392	-1.2392
YBR171W	SEC66	0.949	0.6431	0.6431	0.6431	0.6431	0.6431	0.6431	0.6431	0.6431	0.6431	0.6431	0.6431	0.6431	0.6431	0.6431	0.6431	0.6431	0.6431	0.3956	0.3956	0.3956	0.3956	0.3956	0.3956	0.3956	0.3956	0.3956	0.3956	0.3956	0.3956	0.3956																	-0.593
YKR068C	BET3																				-0.2822	-0.2822	-0.2822	-0.2822	-0.2822	-0.2822	-0.2822	-0.2822	-0.2822	-0.2822	-0.2822	-0.2822		-0.6358	-0.6358	-0.6358	-0.6358	-0.6358	-0.6358	-0.6358	-0.6358	-0.6358	-0.6358	-0.6358	-0.6358	-0.6358			-0.8952
YIL152W		-0.356	-0.356	-0.356	-0.356	-0.356	-0.356	-0.356	-0.356	-0.356	-0.2982	-0.2982	-0.2982	-0.2982	-0.2982	-0.2982	-0.2982	-0.2982	-0.2982	-0.2982	-0.2982		0.1853	0.1853	0.1853	0.1853	0.1853	0.1853	0.1853	0.1853	0.1853	0.1853	0.1853	-0.3904	-0.3904	-0.3904	-0.3904	-0.3904	-0.3904	-0.3904	-0.3904	-0.3904	-0.3904	-0.3904	-0.3904	-0.3904	-0.3904	-0.3904	-0.3904
YIL046W-A		0.1478	0.1478	0.1478	0.1478	0.1478	0.1478			-0.0229	-0.0229	-0.0229	-0.0229	-0.0229	-0.0229	-0.0229	-0.0229	-0.0229	-0.0229	-0.0229	-0.0229	-0.0229	-0.0229	-0.0229	-0.0229	-0.0229	0.0212	0.0212	0.0212	0.0212	0.0212	0.0212	0.0212	0.0212	0.0212	0.0212	0.0212
YDR435C	PPM1	0.4408	0.4408	0.4408	0.4408	0.4408	0.4408	0.4408	0.4408	0.2371	0.0843	0.0843	0.0843	0.0843	0.0843	0.0843	0.0843	0.0843	0.0843	0.0843	0.0843	0.1709	0.1709	0.1709	0.1709	0.1709	0.1709	0.1709	0.1709	0.1709	0.1709	0.1709	0.1709	0.1709	0.1709	0.1709	0.9701	0.9701	0.9701	0.9701	0.9701	0.9701	0.9701	0.9701	0.9701	0.9701	0.9701	0.9701	0.5821
YGL147C	RPL9A	-1.1518	-1.1518	-1.1518	-1.1518	-1.1518	-1.1518	-1.1518	-1.1518	-1.1518	-1.1518	-1.1518
YDL215C	GDH2	-0.8436	-0.8436	-0.8436	-0.8436	-0.8436	-0.8436	-0.8436	-0.8436	-0.8436		-1.4894	-1.4894	-1.4894	-1.4894	-1.4894	-1.4894	-1.4894	-1.4894	-1.4894	-1.4894	-1.4894	-1.4894	-1.4894	-1.4894	-1.4894	-1.4894	-1.4894	-1.4894			0.0002	0.0002	0.0002	0.0002	0.0002	0.0002	0.0002	0.0002	0.0002	0.0002	0.0002	0.0002	0.0002	0.0002	-0.7116	-0.7116	-0.7116	-0.7116
YOL120C	RPL18A	-0.7002			-1.0333	-1.0333	-1.0333	-1.0333	-1.0333	-1.0333	-1.0333	-1.0333	-1.0333	-1.0333	-1.0333	-1.0333	-1.0333	-1.0333	-1.0333																												-0.9331	-0.9331	-0.9331
YPR124W	CTR1	-0.7053	-0.7176	-0.7176	-0.7176	-0.7176	-0.7176	-0.7176	-0.7176	-0.7176	-0.7176	-0.7176	-0.7176	-0.7176	-0.7176	-0.7176	-0.7176	-0.7176	-0.7176													-0.553	-0.553	-0.553	-0.553	-0.553	-0.553	-0.553	-0.553	-0.553	-0.553	-0.553	-0.553	-0.553
YDR121W	DPB4	0.5363	0.5363	0.5014	0.5014	0.5014	0.5014	0.5014	0.5014	0.5014	0.5014	0.5014	0.5014							0.5628	0.5628	0.5628	0.5628	0.5628	0.5628	0.5628	0.5628	0.5628	0.5628	0.5628	0.5628	0.5628																0.1853	0.1853
YNL078W	NIS1	0.1747	0.1747	0.1747	0.1747	0.1747	0.1747	0.1747	0.0714	-0.3422	-0.3422	-0.3422	-0.3422	-0.3422	-0.3422	-0.3422	-0.3422	-0.3422	-0.3422	-0.3422	-0.3422
YGR149W		-0.6482	-0.6482	-0.6482	-0.6482	-0.6482	-0.6482	-0.6482	-0.6482	-0.6482	-0.6482	-0.6482																																			-1.5181	-1.5181	-1.5181
YJR055W	HIT1
YNR036C	MRPS12	-0.1273	-0.1273	-0.1273	-0.1273	-0.1273	-0.1273	-0.1273	-0.1273	-0.1273			0.0041	0.0041	0.0041	0.0041	0.0041	0.0041	0.0041	0.0041	0.0041	0.0041	0.0041	0.0041	0.0041	0.0041	0.0041	0.0041	-0.5314	-0.5909	-0.5909	-0.5909	-0.5909	-0.5909	-0.5909	-0.5909	-0.5909	-0.5909										-0.5599	-0.5599
YPL089C	RLM1							-0.3997	-0.3997	-0.3997	-0.3997	-0.3997	-0.3997	-0.3997	-0.3997	-0.3997	-0.3997	-0.3997	-0.3997	-0.3997	-0.3997	-0.3997		-1.1924	-1.1924	-1.1924	-1.1924	-1.1924	-1.1924	-1.1924	-1.1924	-1.1924	-1.1924
YIL069C	RPS24B
YDR322C-A	TIM11	0.3388	0.3388	-0.1128	-0.3386	-0.3386	-0.3386	-0.3386	-0.3386	-0.3386	-0.3386	-0.3386	-0.3386	-0.3386	-0.3386	-0.3386	-0.3386	-0.3386	-0.3386	-0.3386						-0.4671	-0.4671	-0.4671	-0.4671	-0.4671	-0.4671	-0.4671	-0.4671	-0.4671	-0.4671	-0.4671	-0.4671
YKL006C-A	SFT1						-0.9632	-0.9632	-0.9632	-0.9632	-0.9632	-0.9632	-0.9632	-0.9632	-0.9632	-0.9632	-0.9632	-0.9632	-0.9632	-0.9632	-0.9632	-0.411	-0.411	-0.411	-0.411	-0.411	-0.411	-0.411	-0.411	-0.411	-0.411	-0.411	-0.411	-0.411	-0.411	-0.411
YKR043C		0.0811	0.0811	0.0811	0.0811	0.0811	0.0811	0.0811	0.0811	0.0956	0.1972	0.1972	0.1972	0.1972	0.1972	0.1972	0.1972	0.1972	0.1972	0.1972	0.1972	0.1972			-0.3217	-0.3217	-0.3217	-0.3217	-0.3217	-0.3217	-0.3217	-0.3217	-0.3217	-0.3217	-0.3217	-0.3217	-0.3217
YGR021W		0.0002	0.0002	0.0002	0.0002	0.0002						0.0933	0.0933	0.0933	0.0933	0.0933	0.0933	0.0933	0.0933	0.0933	0.0933	0.0933	0.0933	-0.1388	-0.1388	-0.1388	-0.1388	-0.1388	-0.1388	-0.1388	-0.1388	-0.1388	-0.1388	-0.1388	-0.1388
YDL022W	GPD1
YPL075W	GCR1	-0.7786	-0.7786	-0.0379	-0.0379	-0.0379	-0.0379	-0.0379	-0.0379	-0.0379	-0.0379	-0.0379	-0.0379				-0.2628	-0.2628	-0.2628	-0.2628	-0.2628	-0.2628	-0.2628	-0.2628	-0.2628	-0.2628	-0.2628	-0.2628	-0.2628	-0.2628	-0.2628	-0.2628	-0.2628	-0.2628
YNL056W	OCA2	-0.4243		0.7807	0.7807	0.7807	0.7807	0.7807	0.7807	0.7807	0.7807	0.7807	0.7807																	-0.6018	-0.6018	-0.6018	-0.6018	-0.6018	-0.6018	-0.6018	-0.6018	-0.6018	-0.6018	-0.6018	-0.6018	-0.6018
YJL178C	ATG27																																																-0.6764
YNR014W																																	-0.8363	-0.8363	-0.8363	-0.8363	-0.8363	-0.8363	-0.8363	-0.8363	-0.8363	-0.8363	-0.8363	-0.1434	-0.028	-0.028	-0.028	-0.028	-0.028
YLR337C	VRP1												-0.1518	-0.1518	-0.1518	-0.1518	-0.1518	-0.1518	-0.1518	-0.1518	-0.1518	-0.1518	-0.1518	-1.0904	-1.0904	-1.0904	-1.0904	-1.0904	-1.0904	-1.0904	-1.0904	-1.0904	-1.0904	-1.0904	-1.0904	-1.0904	-1.0904	-1.0904	-1.0904	-1.0904	-1.0904
YOR063W	RPL3	-0.8257	-0.8257	-0.8257	-0.8257	-0.8257	-0.8257	-0.8257	-0.8257	-0.8257	-0.8257	-0.5319	-0.5319	-0.5319	-0.5319	-0.5319	-0.5319	-0.5319	-0.5319	-0.5319	-0.5319	-0.5319	-0.5319	-0.5319	-0.5319	-0.5319	-0.5319	-0.5319
YOR278W	HEM4	-1.3464
YML022W	APT1	-0.1612	-0.1612						-0.4433	-0.4433	-0.4433	-0.4433	-0.4433	-0.4433	-0.4433	-0.4433	-0.4433	-0.4433	-0.4433	-0.4433	-0.4433	-0.2842	-0.2842	-0.2842	-0.2842	-0.2842	-0.2842	-0.2842	-0.2842	-0.2842	-0.2842	-0.2842	-0.2842	-0.2842												-0.3217	-0.3217	-0.3217	-0.3217
YER045C	ACA1												-0.7874	-0.7874	-0.7874	-0.7874	-0.7874	-0.7874	-0.7874	-0.7874	-0.7874	-0.7874	-0.7874	-0.7874	-0.7874	-0.7874	-0.7874	-0.7874	-0.7874	-0.7874
YER037W	PHM8
YML092C	PRE8				-0.8402	-0.8402	-0.8402	-0.8402	-0.8402	-0.8402	-0.8402	-0.8402	-0.8402	-0.8402	-0.8402	-0.8402	-0.8402	-0.8402	-0.8402	-0.8402	-0.8402
YGR055W	MUP1																																																-0.3957
YOL149W	DCP1	-0.183	-0.183	-0.2711	-0.5353	-0.5353	-0.5353	-0.5353	-0.5353	-0.5353	-0.5353	-0.5353	-0.5353	-0.5353	-0.5353	-0.5353	-0.5353	-0.5353	-0.5353	-0.5353	-0.5353	-0.5353	-0.6909	-0.6909	-0.6909	-0.6909	-0.6909	-0.6909	-0.6909	-0.6909	-0.6909	-0.6909	-0.6909	-0.6909
YDR363W-A	SEM1	-0.4372	-0.4372	-0.4372	-0.4372	-0.4372	-0.4372	-0.4372	-0.4372	-0.4372	-0.4372																																						-1.5544
YGR015C					0.4692	0.4692	0.4692	0.4692	0.4692	0.4692	0.4692	0.4692	0.4692	0.4692	0.4692	0.4692	0.4692	0.4692								-0.2925	-0.2925	-0.2925	-0.2925	-0.2925	-0.2925	-0.2925	-0.2925	-0.2925	-0.2925					0.216	0.216	0.216	0.216	0.216	0.216	0.216	0.216	0.216	0.216
YDR065W		-0.3492	-0.3492	-0.3492	-0.3492	-0.3492	-0.3492	-0.3492	-0.3492	-0.3492	-0.3492	-0.3492	-0.3492	-0.3492	-0.3492	-0.3492									-0.3549	-0.3549	-0.3549	-0.3549	-0.3549	-0.3549	-0.3549	-0.3549	-0.3549	-0.3549									-0.1758	-0.1758	-0.1758	-0.1758	-0.1758	-0.1758	-0.1758
YDL177C		0.5793	0.5793	0.5793		0.6927	0.6927	0.6927	0.6927	0.6927	0.6927	0.6927	0.6927	0.6927	0.6927	0.6927	0.6927	0.6927	0.6927	0.6927	0.6927	0.6927	0.108	0.108	0.108	0.108	0.108	0.108	0.108	0.108	0.108	0.108	0.108	0.108	0.108	0.108	0.108	0.108	0.108	-0.0191	-0.0191	-0.0191	-0.0191	-0.0191	-0.0191	-0.0191	-0.0191	-0.0191	-0.0191
YPL060W	LPE10	-1.5902				-0.7665	-0.7665	-0.7665	-0.7665	-0.7665	-0.7665	-0.7665	-0.7665	-0.7665	-0.7665	-0.7665	-0.7665	-0.7665	-0.7665	-0.7665	-0.7665	-0.7665	-0.7665				-0.2799	-0.2799	-0.2799	-0.2799	-0.2799	-0.2799	-0.2799	-0.2799	-0.2799	-0.2799	-0.2799
YPL157W	TGS1	-0.7107	-0.7107	-0.7107	-0.7107		0.7938	0.7938	0.7938	0.7938	0.7938	0.7938	0.7938	0.7938	0.7938	0.7938	0.6333	0.5263	0.5263	0.5263	0.5263	0.5263	0.5263	0.5263	0.5263	0.5263	-0.2937	-0.2937	-0.2937	-0.2937	-0.2937	-0.2937	-0.2937	-0.2937	-0.2937	-0.2937	-0.2937
YBL030C	PET9	-0.7298	-0.7298	-0.7298	-0.7298	-0.7298	-0.7298	-0.7298	-0.608	-0.608	-0.608	-0.608	-0.608	-0.608	-0.608	-0.608	-0.608	-0.608	-0.608	-0.608
YPR157W																														-0.8071	-0.8071	-0.8071	-0.8071	-0.8071	-0.8071	-0.8071	-0.8071	-0.8071	-0.8071	-0.8071	-0.8071	-0.8071	-0.8071	0.0298	0.0298	0.0298	0.0298	0.0298	0.0298
YOR267C	HRK1																																-0.7847	-0.7847	-0.7847	-0.7847	-0.7847	-0.7847	-0.7847	-0.7847	-0.7847	-0.7847	-0.7847	-0.6905	-0.6529	-0.6529	-0.6529	-0.6529	-0.6529
YLR375W	STP3	0.5593	0.5593	0.5593	0.5593	0.5593	0.5593	0.5593	0.5593	0.5593	0.5593	0.5593	0.5593	0.5593	0.5593				0.0633	0.0633	0.0633	0.0633	0.0633	0.0633	0.0633	0.0633	0.0633	0.0633	0.0633	0.0633	0.0633	0.0633	0.0633	1.5408	1.5408	1.5408	1.5408	1.5408	1.5408	1.5408	1.5408	1.5408	1.5408	1.5408	1.5408	1.5408	1.5408	1.5408	-0.1272
YFR018C		0.4365	0.4365	0.4365	0.4365	0.4365	0.4365	0.4365	0.4365	0.4365	0.4365	0.4365	0.4365	0.4365	0.4365	0.4365	0.4365	0.4365	0.1741	0.1741	0.1741	0.1741	0.1741	0.1741	0.1741	0.1741	0.1741	0.1741	0.1741	0.1741	0.1741	0.1741	0.1741	0.1741	0.1741	0.1741
YIL009C-A	EST3	-0.0993	-0.0993										-0.6372	-0.6372	-0.6372	-0.6372	-0.6372	-0.6372	-0.6372	-0.6372	-0.6372	-0.6372	-0.6372	-0.6372	-0.6372	-0.6372	-0.6372	-0.6372	-0.6372
YMR062C	ECM40									-1.8719	-1.8719	-1.8719	-1.8719	-1.8719	-1.8719	-1.8719	-1.8719	-1.8719	-1.8719	-1.8719	-1.8719				-0.4102	-0.4102	-0.4102	-0.4102	-0.4102	-0.4102	-0.4102	-0.4102	-0.4102	-0.4102	-0.4102	-0.4102	-0.4102	-0.3022	-0.2751	-0.2751	-0.2751	-0.2751	-0.2751	-0.2751	-0.2751	-0.2751	-0.2751	-0.2751	-0.2751
YLR050C		-0.2402	-0.2402	-0.2402	-0.2402	-0.2402	-0.2402	-0.2402	-0.2402	-0.2402	-0.2402	-0.2402	-0.2402	-0.2402	-0.2402			-0.4472	-0.4472	-0.4472	-0.4472	-0.4472	-0.4472	-0.4472	-0.4472	-0.4472	-0.4472	-0.4472	-0.4472	-0.4472	-0.4472																-0.1214	-0.1214	-0.1214
YNR003C	RPC34						-0.3217	-0.3217	-0.3217	-0.3217	-0.3217	-0.3217	-0.3217	-0.3217	-0.3217	-0.3217		-0.6863	-0.6863	-0.6863	-0.6863	-0.6863	-0.6863	-0.6863	-0.6863	-0.6863	-0.6863	-0.6863	-0.6863	-0.6863
YIL007C	NAS2	0.1276	0.1276	0.1276	0.1276	0.1276	0.1276	0.1276	0.1276	0.4783	0.4783	0.4783	0.4783	0.4783	0.4783	0.4783	0.4783	0.4783	0.4783	0.4783	0.4783	0.4783	0.4783	0.4783	0.4783	0.4783	0.4783	0.1234	0.1234	0.1234	0.1234	0.1234	0.1234	0.1234	0.1234	0.1234	0.1234	0.1234	0.1234	0.1234	0.1234
YNL244C	SUI1	0.1388	0.1388	0.1388	0.1388	0.1388	0.1388	0.1388	0.1388	0.1388	0.1388	0.1388		0.4626	0.4626	0.4626	0.4626	0.4626	0.4626	0.4626	0.4626	0.4626	0.4626	0.4626	0.4626	0.4626	-0.5228	-1.5081	-1.5081	-1.5081	-1.5081	-1.5081	-1.5081	-1.5081	-1.5081	-1.5081	-1.5081	-1.5081	-1.5081
YLR174W	IDP2	-0.4679	-0.4679	-0.4679	-0.4679	-0.4679	-0.4679	-0.4679	-0.4679	-0.4679	-0.4679	-0.4679	-0.4679	0.1258	0.1258	0.1258	0.1258	0.1258	0.1258	0.1258	0.1258	0.1258	0.1258	0.1258							-0.1962	-0.1962	-0.1962	-0.1962	-0.1962	-0.1962	-0.1962	-0.1962	-0.1962	-0.1962	-0.1962	-0.1962	-0.1962	-0.1962	-0.1962	-0.1962	-0.1962	-0.3601	-0.3783
YPL028W	ERG10	-0.5261	-0.5261	-0.5261	-0.5261	-0.5261	-0.5261	-0.5261	-0.5261	-0.5261	-0.4443	-0.3217	-0.3217	-0.3217	-0.3217	-0.3217	-0.3217	-0.3217	-0.3217	-0.3217				0.0109	0.0109	0.0109	0.0109	0.0109	0.0109	0.0109	0.0109	0.0109	0.0109	0.0109									0.1853	0.1853	0.1853	0.1853	0.1853	0.1853	0.1853
YGR154C	GTO1	-0.3359						-0.3028	-0.3028	-0.3028	-0.3028	-0.3028	-0.3028	-0.3028	-0.3028	-0.3028	-0.3028	-0.3028	-0.3028	-0.3028	-0.3028	-0.3028	-0.3028	-0.3028	-0.3028																	-0.8468	-0.8468	-0.8468	-0.8468	-0.8468	-0.8468	-0.8468	-0.8468
YGL209W	MIG2	-0.9482	-0.9482	-0.9482	-0.9482	-0.9482	-0.9482	-0.9482	-0.9482	-0.9482	-0.9482	-0.9482	-0.9482
YGL079W		-0.0289	-0.0289	-0.0289	-0.0289	-0.0289	-0.0289	-0.455	-0.455	-0.455	-0.455	-0.455	-0.455	-0.455	-0.455	-0.455	-0.455	-0.455	-0.455	-0.455	-0.455	-0.455	-0.455	-0.455
YGL174W	BUD13	0.5381	0.5381	0.5381	0.2103	0.2103	0.2103	0.2103	0.2103	0.2103	0.2103	0.2103	0.2103	0.2103	0.2103	0.2103	0.2103	0.2103	0.2103	0.2103	0.2103	0.2103	0.1851	0.1743	0.1743	0.1743	0.1743	0.1743	0.1743	0.1743	0.1743	0.1743	0.1743	0.1743	0.1743	0.1743	0.1743	0.1743	0.1743	0.1743						-0.0807	-0.0807	-0.0807	-0.0807
YDR041W	RSM10	-0.9788	-0.9788	-0.9788	-0.9788	-0.9788	-0.9788	-1.5441	-1.5441	-1.5441	-1.5441	-1.5441	-1.5441	-1.5441	-1.5441	-1.5441	-1.4154	-1.0295	-1.0295	-1.0295	-1.0295	-1.0295	-1.0295	-1.0295	-1.0295	-1.0295	-1.0295	-1.0295	-1.0295	-1.0295	-1.0295	-1.0295	-1.0295	-1.0295	-1.0295
YLR346C		-0.7002	-0.7002	-0.7002	-0.7002	-0.7002	-0.7002									-0.6436	-0.6436	-0.6436	-0.6436	-0.6436	-0.6436	-0.6436	-0.6436	-0.6436	-0.6436	-0.6436	-0.6436															-0.5143	-0.5143	-0.5143	-0.5143	-0.5143	-0.5143	-0.5143	-0.5143
YGR260W	TNA1	-0.8609	-0.8609	-0.8609	-0.8609	-0.8609	-0.8609	-0.8609	-0.8609	-0.8609	-0.8609	-0.8609	-0.8609	-0.8609	-0.8609	-0.8609	-0.8609	-0.8609
YJR044C	VPS55	-0.6112	-0.6112	-0.6112	-0.6112		-0.7944	-0.7944	-0.7944	-0.7944	-0.7944	-0.7944	-0.7944	-0.7944	-0.7944	-0.7944	-0.7944											-0.3217	-0.3217	-0.3217	-0.3217	-0.3217	-0.3217	-0.3217	-0.3217	-0.3217	-0.3217	-0.3217
YKR034W	DAL80	0.8061	0.5363	0.5363	0.5363	0.5363	0.5363	0.5363	0.5363	0.5363	0.5363	0.5363	0.4857	0.4857	0.4857	0.4857	0.4857	0.4857	0.4857	0.4857	0.4857	0.4857	0.4857	0.1075	0.1075	0.1075	0.1075	0.1075	0.1075	0.1075	0.1075	0.1075	0.1075	0.1075	-0.2043	-0.2043	-0.2043	-0.2043	-0.2043	-0.2043	-0.2043	-0.2043	-0.2043	-0.2043	-0.2043	-0.2043
YCL049C		-0.6587	-0.6587	-0.6587	-0.6587	-0.6587	-0.6587	-0.5894	-0.5894	-0.5894	-0.5894	-0.5894	-0.5894	-0.5894	-0.5894	-0.5894	-0.5894	-0.5894	-0.5894	-0.5894	-0.5894	-0.5894	-0.5894								-0.2845	-0.2845	-0.2845	-0.2845	-0.2845	-0.2845	-0.2845	-0.2845	-0.2845	-0.2845	-0.2845	-0.2845	-0.2845	-0.2845	-0.2845
YJL196C	ELO1	0.1532	0.1532	0.1532	0.1532	0.1532	0.1532	0.1532	0.1532			-0.2952	-0.2952	-0.2952	-0.2952	-0.2952	-0.2952	-0.2952	-0.2952	-0.2952	-0.2952	-0.2952	-0.2952
YKL201C	MNN4																																				0.0804	0.0804	0.0804	0.0804	0.0804	0.0804	0.0804	0.0804	0.0804	0.0804	0.0804
YPR199C	ARR1	0.3337	0.3337	0.3337	0.3337	-0.129	-0.129	-0.129	-0.129	-0.129	-0.129	-0.129	-0.129	-0.129	-0.129	-0.129	-0.129	0.8933	0.8933	0.8933	0.8933	0.8933	0.8933	0.8933	0.8933	0.8933	0.8933	0.8933																	-0.7637	-0.7637	-0.7637	-0.7637	-0.7637
YBL050W	SEC17	0.453	0.453	0.453	0.453	0.453	0.453	0.453	0.453	0.453	0.453	0.453	0.453	0.453	0.453	-0.1095	-0.1095	-0.1095	-0.1095	-0.1095	-0.1095	-0.1095	-0.1095	-0.1095	-0.1095	-0.1095	-0.1095	-0.1095	-0.1095	-0.1095	-0.1095	-0.1095	-0.1095	-0.1095													0.1241	0.1241	0.1241
YOR085W	OST3	-0.2576	-0.2576	-0.2576	-0.2576	-0.2576	-0.2576	-0.2576	-0.2576	-0.2576	-0.2576	-0.2576	-0.2576	-0.2576	-0.2576	-0.2576				-0.4555	-0.4555	-0.4555	-0.4555	-0.4555	-0.4555	-0.4555	-0.4555	-0.4555	-0.4555	-0.4555	-0.4555	-0.6843	-0.6843	-0.6843	-0.6843	-0.6843	-0.6843	-0.6843	-0.6843	-0.6843	-0.6843	-0.6843						-0.4798	-0.4798
YBL057C	PTH2		0.0374	0.0374	0.0374	0.0374	0.0374	0.0374	0.0374	0.0374	0.0374	0.0374	0.0374	0.0374	0.0374	0.0374	0.0374	-0.0133	-0.0639	-0.0639	-0.0639	-0.0639	-0.0639	-0.0639	-0.0639	-0.0639	-0.0639	0.1858	0.3106	0.3106	0.3106	0.3106	0.3106	0.3106	0.3106	0.3106	0.3106	0.3106	0.3106	0.3106	0.3106	0.3106	0.3106	0.3106			-0.6961	-0.6961	-0.6961
YIR005W	IST3	-0.5281	-0.5281	-0.5281	-0.5281	-0.5281	-0.5281	-0.3602	-0.3602	-0.3602	-0.3602	-0.3602	-0.3602	-0.3602	-0.3602	-0.3602	-0.3602	-0.3602											-0.5093	-0.5093	-0.5093	-0.5093	-0.5093	-0.5093	-0.5093	-0.5093	-0.5093	-0.5093	-0.5093	-0.5093	-0.5093	-0.5093	-0.5093
YHR181W	SVP26														-0.4737	-0.4737	-0.4737	-0.4737	-0.4737	-0.4737	-0.4737	-0.4737	-0.4737	-0.4737
YDR011W	SNQ2																																							-0.1388	-0.1388	-0.1388	-0.1388	-0.1388	-0.1388	-0.1388	-0.1388	-0.1388	-0.1388
YGR067C																-0.253	-0.253	-0.253	-0.253	-0.253	-0.253	-0.253	-0.253	-0.253	-0.253	-0.253	-0.253	-0.253	-0.253	-0.253									-0.0738	-0.0738	-0.0738	-0.0738	-0.0738	-0.0738	-0.0738	-0.0738	-0.0738	-0.0738	-0.0738
YGL198W	YIP4	0.025	0.025	0.025	0.025	0.025	0.025	0.025	0.025	0.025	0.025	0.025	0.025				-0.797	-0.797	-0.797	-0.797	-0.797	-0.797	-0.797	-0.797	-0.797	-0.797	-0.797	-0.797	-0.797	-0.797	-0.797																		-0.3865
YIR036C	IRC24	0.3139	0.3139	0.3139	0.3139	0.3139	0.3139	0.3139	0.3182	0.3212	0.3212	0.3212	0.3212	0.3212	0.3212	0.3212	0.3212	0.3212	0.3212	0.3212	0.3212	0.3212	0.3212	0.3212	0.3212	0.3212					0.1954	0.1954	0.1954	0.1954	0.1954	0.1954	0.1954	0.1954	0.1954	0.1954	0.1954	0.1954
YER064C
YMR035W	IMP2	-0.02	-0.02	-0.02	-0.02	-0.02	-0.02	-0.02	-0.02	-0.02	-0.02	-0.02	-0.02	-0.02	-0.02	-0.02	-0.02	-0.02		-0.0525	-0.0525	-0.0525	-0.0525	-0.0525	-0.0525	-0.0525	-0.0525	-0.0525	-0.0525	-0.0525	-0.0525	-0.0525	-0.0525	-0.0525	-0.0525	-0.0525	-0.0525	-0.0525										-0.2922	-0.2922
YER056C-A	RPL34A	-0.2014	-0.2014	-0.2014	-0.2014	-0.2014	-0.2014	-0.2014	-0.2014	-0.2014	-0.2014	-0.2014	-0.2014
YDL081C	RPP1A	-0.714	-0.714	-0.714	-0.714	-0.714	-0.714	-0.714	-0.714	-0.714	-0.714	-0.714	-0.714	-0.714	-0.714	-0.714
YER074W-A	YOS1						-0.725	-0.725	-0.725	-0.725	-0.725	-0.725	-0.725	-0.725	-0.725	-0.725									-0.1962	-0.1962	-0.1962	-0.1962	-0.1962	-0.1962	-0.1962	-0.1962	-0.1962	-0.1962	-0.1962	-0.1962	-0.1962	-0.1962	-0.1962	-0.1962	-0.1962
YNL042W	BOP3	-0.9762	-0.9762	-0.9762								-1.3104	-1.3104	-1.3104	-1.3104	-1.3104	-1.3104	-1.3104	-1.3104	-1.3104	-1.3104	-1.3104	-1.3104	-1.3104	-1.3104	-1.3104	-1.3104	-1.3104								-0.5754	-0.5754	-0.5754	-0.5754	-0.5754	-0.5754	-0.5754	-0.5754	-0.5754	-0.5754	-0.6244	-0.6978	-0.6978	-0.6978
YML100W-A		-0.4148	-0.4148	-0.4148	-0.4148	-0.4148	-0.4148	-0.4148	-0.4148	-0.4148	-0.4148	-0.4148															-0.748	-0.748	-0.748	-0.748	-0.748	-0.748	-0.748	-0.748	-0.748	-0.748	-0.748	-0.748	-0.748	-0.748	-0.748	-0.748	-0.748
YGR020C	VMA7	-0.2678		-0.1102	-0.1102	-0.1102	-0.1102	-0.1102	-0.1102	-0.1102	-0.1102	-0.1102	-0.1102	-0.1102	-0.1102	-0.1102		-0.2469	-0.2469	-0.2469	-0.2469	-0.2469	-0.2469	-0.2469	-0.2469	-0.2469	-0.2469	-0.2469	-0.2469	-0.2469	-0.2469	-0.2469	-0.2469	-0.2469	-0.2469
YFL034C-A	RPL22B	0.2065	0.2065	0.2065	0.2065					0.2762	0.2762	0.2762	0.2762	0.2762	0.2762	0.2762	0.2762	0.2762	0.2762	0.2762	0.2762	0.2762	0.2762	0.2762	0.2762	0.2762	0.2762
YOL097W-A		0.5675	0.5675	0.5675	0.5675	0.5675	0.5675	0.5675	0.5675	0.4182	0.4182	0.4182	0.4182	0.4182	0.4182	0.4182	0.4182	0.4182	0.4182	0.4182	0.4182	0.4182	0.4182	0.4182	0.4182	0.4182	-0.0358	-0.0358	-0.0358	-0.0358	-0.0358	-0.0358	-0.0358	-0.0358	-0.0358	-0.0358	-0.0358	-0.0358	-0.0358	-0.0358	-0.0358	-0.0358
YKL221W	MCH2	0.3457	0.3457		-0.4349	-0.4349	-0.4349	-0.4349	-0.4349	-0.4349	-0.4349	-0.4349	-0.4349	-0.4349	-0.4349	-0.4349	-0.4349	-0.4349	-0.4349	-0.4349	-0.4349	-0.4349
YPR067W	ISA2	-0.2702	-0.2702	-0.2702	-0.2702	-0.2702	-0.2702	-0.2702				-0.0751	-0.0751	-0.0751	-0.0751	-0.0751	-0.0751	-0.0751	-0.0751	-0.0751	-0.0751	-0.0751	-0.0751	-0.3742	-0.3742	-0.3742	-0.3742	-0.3742	-0.3742	-0.3742	-0.3742	-0.3742	-0.3742	-0.3742												-1.0379	-1.0379	-1.0379	-1.0379
YEL067C		0.129	0.129	0.129										-0.3378	-0.3378	-0.3378	-0.3378	-0.3378	-0.3378	-0.3378	-0.3378	-0.3378	-0.3378	-0.3378	-0.3378	-0.3378	-0.3378	-0.3378	-0.3378	-0.3225	-0.3072	-0.3072	-0.3072	-0.3072	-0.3072	-0.3072	-0.3072	-0.3072	-0.3072	-0.3072	-0.3072	-0.3072	-0.3072	-0.3744	-0.4148	-0.4148	-0.4148	-0.4148	-0.4148
YPL213W	LEA1	0.7087	0.7087	0.7087	0.7087	0.7087	0.7087	0.7087	0.7087				-0.1322	-0.1322	-0.1322	-0.1322	-0.1322	-0.1322	-0.1322	-0.1322	-0.1322	-0.1322	-0.1322	-0.1322	-0.1322																						-0.2546	-0.2546	-0.2546
YHR087W	RTC3	-0.9266	-0.9266	-0.9266	-0.9266	-0.9266	-0.9266	-0.9266											-0.7367	-0.7367	-0.7367	-0.7367	-0.7367	-0.7367	-0.7367	-0.7367	-0.7367	-0.7367	-0.7367		-0.4541	-0.4541	-0.4541	-0.4541	-0.4541	-0.4541	-0.4541	-0.4541	-0.4541	-0.4541	-0.4541	-0.6648	-0.7491	-0.7491	-0.7491	-0.7491	-0.7491	-0.7491	-0.7491
YER087C-B	SBH1	-0.2355		-0.7498	-0.7498	-0.7498	-0.7498	-0.7498	-0.7498	-0.7498	-0.7498	-0.7498	-0.7498	-0.7498	-0.7498	-0.7498	-0.7498	-0.7498	-0.7498	-0.7498
YLR204W	QRI5	0.1024	0.5728	0.5728	0.5728	0.5728	0.5728	0.5728	0.5728	0.5728	0.5728	0.5728	0.5728	0.5728	0.5728	0.5728	0.5728	0.5728	0.5728	0.0409	0.0409	0.0409	0.0409	0.0409	0.0409	0.0409	0.0409	0.0409	0.0409	0.0409	0.0409	0.0409	0.0409	0.0409	0.0409	0.0409												0.0055	0.0055
YIR035C		-0.0865	-0.0865	-0.0865	-0.0865	-0.0865	-0.0865	-0.0865	-0.0865	-0.0865	-0.0865	-0.0865	-0.0865	-0.0865	-0.085	-0.0835	-0.0835	-0.0835	-0.0835	-0.0835	-0.0835	-0.0835	-0.0835	-0.0835	-0.0835	-0.0835	-0.0835	-0.0835	-0.0835	-0.0835	0.2509	0.2509	0.2509	0.2509	0.2509	0.2509	0.2509	0.2509	0.2509	0.2509	0.2509	0.2509	0.2509	0.2509	0.2509	0.2509	0.2509	0.2509	0.2633
YOR145C	PNO1	-0.0729	-0.0729	-0.0729	-0.0729	-0.0729	-0.0729	-0.0729	-0.0729	-0.0729	-0.0729	-0.0729	-0.0729	-0.0729	-0.0729	-0.0729
YFR011C										-1.1152	-1.1152	-1.1152	-1.1152	-1.1152	-1.1152	-1.1152	-1.1152	-1.1152	-1.1152	-1.1152	-1.1152	-1.1152
YDL014W	NOP1	0.2495	0.2495	0.2495	0.2495	0.2495	0.2495	0.2495	0.2495	0.2495	0.2495			-0.4236	-0.4236	-0.4236	-0.4236	-0.4236	-0.4236	-0.4236	-0.4236	-0.4236	-0.4236	-0.4236	-0.4236	-0.4236	-0.4236
YMR143W	RPS16A
YGL248W	PDE1				-0.2513	-0.2513	-0.2513	-0.2513	-0.2513	-0.2513	-0.2513	-0.2513	-0.2513	-0.2513	-0.2513	-0.2513	-0.2513	-0.2513	-0.2513	-0.2513	-0.2513	-0.2513					-0.2651	-0.2651	-0.2651	-0.2651	-0.2651	-0.2651	-0.2651	-0.2651	-0.2651	-0.2651
YOL154W	ZPS1																-0.5023	-0.5023	-0.5023	-0.5023	-0.5023	-0.5023	-0.5023	-0.5023	-0.5023	-0.5023	-0.5023	-0.5023	-0.5023	-0.5023	-0.5023	-0.5023	-0.5023	-0.6753	-0.6753	-0.6753	-0.6753	-0.6753	-0.6753	-0.6753	-0.6753	-0.6753	-0.6753	-0.6753	-0.6753	-0.6753	-0.6753	-0.6753	-0.6753
YLR177W				0.2778	0.2778	0.2778	0.2778	0.2778	0.2778	0.2778	0.2778	0.2778	0.2778	0.2778	0.2778	0.2778	0.2778	0.2778	0.2778	0.2778	0.2778	0.2309	0.2108	0.2108	0.2108	0.2108	0.2108	0.2108	0.2108	0.2108	0.2108	0.2108	0.2108	0.2108	0.2108	0.2108	0.2108	0.2108	0.2108							-0.2198	-0.2198	-0.2198	-0.2198
YBL091C-A	SCS22	-0.0679	-0.0679	-0.0679		-0.6055	-0.6055	-0.6055	-0.6055	-0.6055	-0.6055	-0.6055	-0.6055	-0.6055	-0.6055	-0.6055	-0.6055	-0.6055	-0.6055	-0.6055	-0.6055	-0.6055	-0.4807	-0.4557	-0.4557	-0.4557	-0.4557	-0.4557	-0.4557	-0.4557	-0.4557	-0.4557	-0.4557	-0.4557	-0.4557	-0.4557	-0.4557										-0.3217	-0.3217	-0.3217
YKL002W	DID4	0.2893			0.6563	0.6563	0.6563	0.6563	0.6563	0.6563	0.6563	0.6563	0.6563	0.6563	0.6563	0.6563	0.6563	0.6563		0.4427	0.4427	0.4427	0.4427	0.4427	0.4427	0.4427	0.4427	0.4427	0.4427	0.4427	0.4427	0.4427	0.4427	0.4427	0.4427										0.1449	0.1449	0.1449	0.1449	0.1449
YOL102C	TPT1	-0.6696	-0.6696	-0.6696	-0.6696	0.1258	0.1258	0.1258	0.1258	0.1258	0.1258	0.1258	0.1258	0.1258	0.1258	0.1258	0.1258	0.1258	0.1258												0.2258	0.2258	0.2258	0.2258	0.2258	0.2258	0.2258	0.2258	0.2258	0.2258	0.2258	0.2258	0.2258	0.2258	0.2258	0.2258	0.2258	0.2258
YHR161C	YAP1801	-0.6071		-1.1087	-1.1087	-1.1087	-1.1087	-1.1087	-1.1087	-1.1087	-1.1087	-1.1087	-1.1087	-1.1087	-1.1087	-1.1087	-1.1087	-1.1087	-1.1087	-1.1087				-0.4349	-0.4349	-0.4349	-0.4349	-0.4349	-0.4349	-0.4349	-0.4349	-0.4349	-0.4349	-0.4349	-0.4349	-0.4349	-0.4349	-0.4349	-0.4349	-0.4349
YPL257W																0.0616	0.0616	0.0616	0.0616	0.0616	0.0616	0.0616	0.0616	0.0616	0.0616	0.0616	0.0616	0.0616	0.0616	0.0616	0.0616					-0.6018	-0.6018	-0.6018	-0.6018	-0.6018	-0.6018	-0.6018	-0.6018	-0.6018	-0.6018	-0.6018	-0.6018	-0.6018	-0.6018
YDR099W	BMH2												-0.9822	-0.9822	-0.9822	-0.9822	-0.9822	-0.9822	-0.9822	-0.9822	-0.9822	-0.9822	-0.9822	-0.9822	-0.9822
YLR390W-A	CCW14	-0.6226	-0.6226	-0.6226	-0.6226	-0.6226	-0.6226	-0.6226	-0.6226	-0.6226	-0.6226	-1.2364	-1.2364	-1.2364	-1.2364	-1.2364	-1.2364	-1.2364	-1.2364	-1.2364	-1.2364	-1.2364	-1.2364	-1.2364	-1.2364	-1.2364	-1.2364	-1.2364																					-1.0243
YGL025C	PGD1	0.0726	0.0726	0.0726	0.0726	0.0726	0.0726			-0.4047	-0.4047	-0.4047	-0.4047	-0.4047	-0.4047	-0.4047	-0.4047	-0.4047	-0.4047	-0.4047	-0.4047	-0.4047			0.1077	0.1077	0.1077	0.1077	0.1077	0.1077	0.1077	0.1077	0.1077	0.1077	0.1077	0.1077	0.1077	0.1077	0.1077	0.5325	0.5325	0.5325	0.5325	0.5325	0.5325	0.5325	0.5325	0.5325	0.5325
YIL139C	REV7		-0.4372	-0.4372	-0.4372	-0.4372	-0.4372	-0.4372	-0.4372	-0.4372	-0.4372	-0.4372	-0.4372	-0.4372																-0.3957	-0.3957	-0.3957	-0.3957	-0.3957	-0.3957	-0.3957	-0.3957	-0.3957	-0.3957	-0.3957	-0.3957	-0.3957
YDR286C		-0.1327	-0.1327	-0.1327	-0.1327	-0.1327	-0.1327	-0.1327	-0.1327	-0.1327	-0.1327	-0.1327	-0.1327	-0.1327	-0.1327	-0.1327	-0.1327				-0.2222	-0.2222	-0.2222	-0.2222	-0.2222	-0.2222	-0.2222	-0.2222	-0.2222	-0.2342	-0.2822	-0.2822	-0.2822	-0.2822	-0.2822	-0.2822	-0.2822	-0.2822	-0.2822	-0.2822	-0.2822	-0.2822	-0.2822	-0.2822	-0.2822	-0.2822
YJR112W-A		0.0076	0.0076	0.0076			0.0769	0.0769	0.0769	0.0769	0.0769	0.0769	0.0769	0.0769	0.0769	0.0769	0.0769	0.0769	0.0769	0.0769	0.0769	0.0769	-0.0089	-0.2089	-0.2089	-0.2089	-0.2089	-0.2089	-0.2089	-0.2089	-0.2089	-0.2089	-0.2089	-0.2089	-0.2089	-0.2089	-0.2089	-0.2089	-0.2089						-0.3217	-0.3217	-0.3217	-0.3217	-0.3217
YKR057W	RPS21A	-0.1472	-0.1472	-0.1472	-0.1472	-0.1472	-0.1472	-0.1472	-0.1472	-0.1472	-0.1472	-1.1518	-1.1518	-1.1518	-1.1518	-1.1518	-1.1518	-1.1518	-1.1518	-1.1518	-1.1518	-1.1518	-1.1518	-1.1518	-1.1518	-1.1518	-1.1518	-1.1518
YBR187W	GDT1	-0.0475	-0.0475	-0.0475	-0.0475	-0.0475	-0.0475	-0.0475	-0.0475										0.1758	0.1758	0.1758	0.1758	0.1758	0.1758	0.1758	0.1758	0.1758	0.1758	0.1758	0.1758	0.1758	0.1758	0.1758																-0.5143
YMR044W	IOC4	-0.3527	-0.3527	-0.3527	-0.3527	-0.3527	-0.3527	-0.3527	-0.3527	-0.3527	-0.3527	-0.3527	-0.3527	-0.3527	-0.3527	-0.3527	-0.3527	-0.3527																														-0.6945	-0.6945
YLR265C	NEJ1	-0.3217	-0.3217	-0.3217	-0.3217	-0.3217	-0.3217	-0.3217	-0.3217	-0.3217			-0.7856	-0.7856	-0.7856	-0.7856	-0.7856	-0.7856	-0.7856	-0.7856	-0.7856	-0.7856	-0.7856	-1.073	-1.1448	-1.1448	-1.1448	-1.1448	-1.1448	-1.1448	-1.1448	-1.1448	-1.1448	-1.1448	-1.1448	-1.1448	-1.1448	-1.1448	-1.1448	-1.1448	-1.1448
YDR163W	CWC15	0.2998	0.2998	0.2998	0.2998				-0.3612	-0.3612	-0.3612	-0.3612	-0.3612	-0.3612	-0.3612	-0.3612	-0.3612	-0.3612	-0.3612										-0.7087	-0.7087	-0.7087	-0.7087	-0.7087	-0.7087	-0.7087	-0.7087	-0.7087	-0.7087	-0.7087	-0.7087	-0.7087							-0.5711	-0.5711
YLR405W	DUS4	-0.3831	-0.3831	-0.5141	-0.7763	-0.7763	-0.7763	-0.7763	-0.7763	-0.7763	-0.7763	-0.7763	-0.7763	-0.7763	-0.7763	-0.7763	-0.7763	-0.7763	-0.7763	-0.7763	-0.7763				-0.1749	-0.1749	-0.1749	-0.1749	-0.1749	-0.1749	-0.1749	-0.1749	-0.1749	-0.1749	-0.1749
YER011W	TIR1																								-1.0035	-1.0035	-1.0035	-1.0035	-1.0035	-1.0035	-1.0035	-1.0035	-1.0035	-1.0035	-1.0035	-1.0035	-1.0035	-1.0035	-1.0035	-1.0035	-1.0035	-1.0035	-0.9556	-0.9556	-0.9556	-0.9556	-0.9556	-0.9556	-0.9556
YAL055W	PEX22	-0.5046	-0.5046	-0.5046	-0.5046	-0.5046	-0.5046	-0.5046	-0.5046	-0.5046	-0.5046	-0.5046
YNL086W		-0.55	-0.55	-0.5208	-0.4042	-0.4042	-0.4042	-0.4042	-0.4042	-0.4042	-0.4042	-0.4042	-0.4042	-0.4042	-0.4042	-0.4042	-0.4042	-0.4042	-0.4042	-0.4042	-0.4042	-0.4042	-0.4342	-0.4342	-0.4342	-0.4342	-0.4342	-0.4342	-0.4342	-0.4342	-0.4342	-0.4342	-0.4342														-0.6243	-0.6243	-0.6243
YDR002W	YRB1	0.5681	0.5681	0.5681	0.5681												0.1404	0.1404	0.1404	0.1404	0.1404	0.1404	0.1404	0.1404	0.1404	0.1404	0.1404	0.1404	0.1404
YHR070W	TRM5	0.4603	0.4603	0.4603	0.4603	0.4603	0.4603				0.3094	0.3094	0.3094	0.3094	0.3094	0.3094	0.3094	0.3094	0.3094	0.3094	0.3094	0.3094	0.3094	0.3094	0.3094		0.0279	0.0279	0.0279	0.0279	0.0279	0.0279	0.0279	0.0279	0.0279	0.0279	0.0279	0.0279	0.0279	0.0279	0.0279	0.0279
YJL004C	SYS1	-0.4986	-0.4986	-0.5549	-0.6112	-0.6112	-0.6112	-0.6112	-0.6112	-0.6112	-0.6112	-0.6112	-0.6112	-0.6112	-0.6112				-0.9221	-0.9221	-0.9221	-0.9221	-0.9221	-0.9221	-0.9221	-0.9221	-0.9221	-0.9221	-0.9221	-0.9221
YOR315W	SFG1																														-1.2651	-1.2651	-1.2651	-1.2651	-1.2651	-1.2651	-1.2651	-1.2651	-1.2651	-1.2651	-1.2651	-1.2651	-1.2651	-1.2651	-1.2651
YPL163C	SVS1	-0.812									-0.9221	-0.9221	-0.9221	-0.9221	-0.9221	-0.9221	-0.9221	-0.9221	-0.9221	-0.9221	-0.9221	-0.9221	-0.9221																	-0.5061	-0.5061	-0.5061	-0.5061	-0.5061	-0.5061	-0.5061	-0.5061	-0.5061	-0.5061
YCR015C																							-0.2128	-0.2128	-0.2128	-0.2128	-0.2128	-0.2128	-0.2128	-0.2128	-0.2128	-0.2128	-0.2128	-0.2128	-0.2128	-0.2128										-0.2437	-0.2437	-0.2437	-0.2437
YHR021W-A	ECM12																																									-0.9998	-0.9998	-0.9998	-0.9998	-0.9998	-0.9998	-0.9998	-0.9998
YOR258W	HNT3	-0.0727	-0.0727	-0.0727	-0.0727	-0.0727	-0.0727	-0.0727	-0.0727	-0.0727	-0.0727													0.6548	0.6548	0.6548	0.6548	0.6548	0.6548	0.6548	0.6548	0.6548	0.6548	0.6548	0.6548				0.295	0.295	0.295	0.295	0.295	0.295	0.295	0.295	0.295	0.295	0.295
YJR149W		-0.6464	-0.6464	-0.6464	-0.6464	-0.6464	-0.6464		-0.4163	-0.4163	-0.4163	-0.4163	-0.4163	-0.4163	-0.4163	-0.4163	-0.4163	-0.4163	-0.4163								-0.2852	-0.2852	-0.2852	-0.2852	-0.2852	-0.2852	-0.2852	-0.2852	-0.2852	-0.2852	-0.2852	-0.671	-0.671	-0.671	-0.671	-0.671	-0.671	-0.671	-0.671	-0.671	-0.671	-0.671	-0.671
YEL023C		0.8194	0.8194	0.8194	0.8194	0.8194	0.8194	0.8194	0.8194	0.8194	0.8194	0.8194	0.8194	0.8194	0.8194	0.8194	1.0616	1.0616	1.0616	1.0616	1.0616	1.0616	1.0616	1.0616	1.0616	1.0616
YML063W	RPS1B																																															0.1258	0.1258
YBR162C	TOS1	-0.2392	-0.2392	-0.2392				-0.7238	-0.7238	-0.7238	-0.7238	-0.7238	-0.7238	-0.7238	-0.7238	-0.7238	-0.7238
YOR103C	OST2	0.39	0.39	0.39	0.39	0.39	0.39	0.39	0.39	0.39	0.39	0.39	0.39	0.39	0.39	0.0608	0.0608	0.0608	0.0608	0.0608	0.0608	0.0608	0.0608	0.0608	0.0608	0.0608	0.0608	0.0608	0.0608	0.0608												-0.2852	-0.2852	-0.2852	-0.2852	-0.2852	-0.2852	-0.2852	-0.2852
YER121W				-0.0654	-0.0654	-0.0654	-0.0654	-0.0654	-0.0654	-0.0654	-0.0654	-0.0654	-0.0654	-0.1626	-0.1904	-0.1904	-0.1904	-0.1904	-0.1904	-0.1904	-0.1904	-0.1904	-0.1904	-0.1904																	-0.2148	-0.2148	-0.2148	-0.2148	-0.2148	-0.2148	-0.2148	-0.2148	-0.2148
YPL264C			-0.6436	-0.6436	-0.6436	-0.6436	-0.6436	-0.6436	-0.6436	-0.6436	-0.6436	-0.6436	-0.6436	-0.5292	-0.4529	-0.4529	-0.4529	-0.4529	-0.4529	-0.4529	-0.4529	-0.4529	-0.4529	-0.4529	-0.4529	-0.4529	-0.4529	-0.4529	-0.4529	-0.4529			-0.5342	-0.5342	-0.5342	-0.5342	-0.5342	-0.5342	-0.5342	-0.5342	-0.5342	-0.5342	-0.5342	-0.5342	-0.5342	-0.5342	-0.5342	-0.5342	-0.5342
YHR203C	RPS4B	-0.9067	-0.9067	-0.9067	-0.9067	-0.9067	-0.9067	-0.9067	-0.9067	-0.9067	-0.9067	-0.9067
YLL023C		0.047			0.0409	0.0409	0.0409	0.0409	0.0409	0.0409	0.0409	0.0409	0.0409	0.0409	0.0409	0.0409	0.0409	0.0409	0.0409	0.0409	-0.0236	-0.0558	-0.0558	-0.0558	-0.0558	-0.0558	-0.0558	-0.0558	-0.0558	-0.0558	-0.0558	-0.0558	-0.0558	-0.0558	-0.0558	-0.0558	-0.0558	-0.0558	-0.0558							-0.6112	-0.6112	-0.6112	-0.6112
YMR074C		-0.8811	-0.8811							-1.4472	-1.4472	-1.4472	-1.4472	-1.4472	-1.4472	-1.4472	-1.4472	-1.4472	-1.4472	-1.4472	-1.4472	-1.4472	-1.4472																								-0.6112	-0.6112	-0.6112
YGR144W	THI4																	-1.0943	-1.0943	-1.0943	-1.0943	-1.0943	-1.0943	-1.0943	-1.0943	-1.0943	-1.0943	-1.0943	-1.0943	-1.0943	-1.0943	-1.0943	-1.0943
YDR153C	ENT5	-1.0587	-1.0587	-1.0587	-1.0587	-1.0587	-1.0587	-1.0587	-1.0587	-1.0587	-1.0587	-1.0587	-1.0587	-1.0587	-1.0587	-1.0587		-1.426	-1.426	-1.426	-1.426	-1.426	-1.426	-1.426	-1.426	-1.426	-1.426	-1.426
YNL032W	SIW14				0.7328	0.7328	0.7328	0.7328	0.7328	0.7328	0.7328	0.7328	0.7328	0.7328	0.7328	0.7328	0.7328	0.7328	0.7328	0.7328	0.4366	-0.2546	-0.2546	-0.2546	-0.2546	-0.2546	-0.2546	-0.2546	-0.2546	-0.2546	-0.2546	-0.2546	-0.2546
YKL127W	PGM1																					-0.7912	-0.7912	-0.7912	-0.7912	-0.7912	-0.7912	-0.7912	-0.7912	-0.7912	-0.7912	-0.7912	-0.7912	-0.7912														-0.2852	-0.2852
YHL034C	SBP1	-1.0221	-1.0221	-1.0221	-1.0221	-1.0221	-1.0221	-1.0221	-1.0221	-1.0221	-1.0221	-1.0221	-0.5233	-0.5233	-0.5233	-0.5233	-0.5233	-0.5233	-0.5233	-0.5233	-0.5233	-0.5233	-0.5233		-1.3217	-1.3217	-1.3217	-1.3217	-1.3217	-1.3217	-1.3217	-1.3217	-1.3217	-1.3217	-1.3217	-1.3217	-1.3217	-1.3217	-1.3217	-1.155	-0.3217	-0.3217	-0.3217	-0.3217	-0.3217	-0.3217	-0.3217	-0.3217	-0.5223
YNL141W	AAH1									-0.4179	-0.4179	-0.4179	-0.4179	-0.4179	-0.4179	-0.4179	-0.4179	-0.4179	-0.4179	-0.4179	-0.4179	-0.4179	-0.4179
YGR006W	PRP18		0.1787	0.1787	0.1787	0.1787	0.1787	0.1787	0.1787	0.1787	0.1787	0.1787	0.1787	0.1787						0.1675	0.1675	0.1675	0.1675	0.1675	0.1675	0.1675	0.1675	0.1675	0.1675	0.1675	0.1675	0.1675	0.1675	0.1675	0.1675	0.1675	0.1675	0.1675		0.2402	0.2402	0.2402	0.2402	0.2402	0.2402	0.2402	0.2402	0.2402	0.2402
YDL138W	RGT2																	-0.8551	-0.8551	-0.8551	-0.8551	-0.8551	-0.8551	-0.8551	-0.8551	-0.8551	-0.8551	-0.8551	-0.8551	-0.8551	-0.8551	-0.8551	-0.8551	-0.8551	-0.8551														-0.8327
YER083C	GET2	-0.3217	-0.3217	-0.3904	-0.3904	-0.3904	-0.3904	-0.3904	-0.3904	-0.3904	-0.3904	-0.3904	-0.3904	-0.3904	-0.3904	-0.3904	-0.3904	-0.3904	-0.3904	-0.3904	-0.3904	-0.1975	-0.1975	-0.1975	-0.1975	-0.1975	-0.1975	-0.1975	-0.1975	-0.1975	-0.1975	-0.1975	-0.1975	-0.1975	-0.1975	-0.1975	-0.1975	-0.1975	-0.1975										-0.4724
YJR007W	SUI2	-0.5819	-0.5819	-0.5819	-0.5819	-0.5819	-0.5819	-0.5819	-0.5819	-0.5819	-0.5819	-0.5819	-0.5819	-0.5819	-0.5819	-0.5819	-0.5819					-1.129	-1.129	-1.129	-1.129	-1.129	-1.129	-1.129	-1.129	-1.129	-1.129	-1.129
YDR051C	DET1	-0.7665	-0.7665	-0.7665	-0.7665	-0.7665	-0.7665	-0.7665	-0.7665	-0.7665	-0.7665	-0.7665	-0.7665	-0.7665	-0.7665	-0.7665	-0.7665	-0.5521	-0.4092	-0.4092	-0.4092	-0.4092	-0.4092	-0.4092	-0.4092	-0.4092	-0.4092	-0.4092																		-0.8071	-0.8071	-0.8071	-0.8071
YNL003C	PET8	-0.7774	-0.7774	-0.7774	-0.7774	-0.7774	-0.7774					-0.8781	-0.8781	-0.8781	-0.8781	-0.8781	-0.8781	-0.8781	-0.8781	-0.8781	-0.8781	-0.8781					-0.3675	-0.3675	-0.3675	-0.3675	-0.3675	-0.3675	-0.3675	-0.3675	-0.3675	-0.3675	-0.3675	-0.3675	-0.3675	-0.3675	-0.3675	-0.3675	-0.3675	-0.3675
YOL071W	EMI5	0.0127	0.0127								-0.6399	-0.6399	-0.6399	-0.6399	-0.6399	-0.6399	-0.6399	-0.6399	-0.6399	-0.6399	-0.6399	-0.6399	-0.4215	-0.2759	-0.2759	-0.2759	-0.2759	-0.2759	-0.2759	-0.2759	-0.2759	-0.2759	-0.2759	-0.2759							-0.6018	-0.6018	-0.6018	-0.6018	-0.6018	-0.6018	-0.6018	-0.6018	-0.6018
YOR213C	SAS5								-0.2893	-0.2893	-0.2893	-0.2893	-0.2893	-0.2893	-0.2893	-0.2893	-0.2893	-0.2893	-0.2893	-0.2893	-0.2893	-0.3319	-0.5023	-0.5023	-0.5023	-0.5023	-0.5023	-0.5023	-0.5023	-0.5023	-0.5023	-0.5023	-0.5023	-0.5023														0.0409	0.0409
YPR073C	LTP1	-0.0853	-0.0853	-0.0853	-0.0853	-0.0853	-0.0853	-0.0853	-0.0853	-0.0853	-0.0853	-0.0853	-0.0853	-0.0853	-0.0853	-0.0853																							-0.0993	-0.0993	-0.0993	-0.0993	-0.0993	-0.0993	-0.0993	-0.0993	-0.0993	-0.0993	-0.0993
YNR037C	RSM19	0.6204	0.6204	0.6204	0.6204	0.6204	0.6204	0.6204	0.6204	0.6204	0.6204	0.6204	0.6204	0.6204	0.6204			0.3082	0.3082	0.3082	0.3082	0.3082	0.3082	0.3082	0.3082	0.3082	0.3082	0.3082	0.3082	0.3082	0.3082	0.3082	0.3082	0.3082	0.3082	0.4748	0.4748	0.4748	0.4748	0.4748	0.4748	0.4748	0.4748	0.4748	0.4748		-0.1273	-0.1273	-0.1273
YIL136W	OM45	-0.6843	-0.6843	-0.6843			-0.1392	-0.1392	-0.1392	-0.1392	-0.1392	-0.1392	-0.1392	-0.1392	-0.1392	-0.1392	-0.1392	-0.1392	-0.1392	-0.1392	-0.1392	-0.1392	-0.1392	-0.2266	-0.3576	-0.3576	-0.3576	-0.3576	-0.3576	-0.3576	-0.3576	-0.3576	-0.3576	-0.3576	-0.3576	-0.3576	-0.3576	-0.3576	-0.3576	-0.3576	-0.3576	-0.3576			0.2723	0.2723	0.2723	0.2723	0.2723
YDR222W																																-0.9702	-0.9702	-0.9702	-0.9702	-0.9702	-0.9702	-0.9702	-0.9702	-0.9702	-0.9702	-0.9702
YBR210W	ERV15	0.2219	0.2219	0.2219	0.2219	0.2219	0.2219	0.2219	0.2219	-0.1674	-0.1674	-0.1674	-0.1674	-0.1674	-0.1674	-0.1674	-0.1674	-0.1674	-0.1674	-0.1674	-0.1674	-0.1674																										-0.6937	-0.6937
YDL079C	MRK1							-0.3442	-0.3442	-0.3442	-0.3442	-0.3442	-0.3442	-0.3442	-0.3442	-0.3442	-0.3442	-0.3442	-0.3442	-0.3442	-0.3442	0.0933	0.0933	0.0933	0.0933	0.0933	0.0933	0.0933	0.0933	0.0933	0.0933	-0.0423	-0.0423	-0.0423	-0.0423	-0.0423	-0.0423	-0.0423	-0.0423	-0.0423	-0.0423	-0.0423	-0.0423	-0.0423	-0.0423				-0.0136
YBR145W	ADH5			0.3446	0.3446	0.3446	0.3446	0.3446	0.3446	0.3446	0.3446	0.3446	0.3446	0.3446	0.3446	0.3446	-0.5847	-0.5847	-0.5847	-0.5847	-0.5847	-0.5847	-0.5847	-0.5847	-0.5847	-0.547	-0.547	-0.547	-0.547	-0.547	-0.547	-0.547	-0.547	-0.547	-0.547	-0.553	-0.553	-0.553	-0.553	-0.553	-0.553	-0.553	-0.553	-0.553	-0.553	-0.553	-0.553	-0.553	-0.553
YDR308C	SRB7																																-0.8242	-0.8242	-0.8242	-0.8242	-0.8242	-0.8242	-0.8242	-0.8242	-0.8242	-0.8242	-0.8242
YNL135C	FPR1	0.0153	0.2118	0.369	0.369	0.369	0.369	0.369	0.369	0.369	0.369	0.369	0.369	0.369	0.369	0.369	0.0262	0.0262	0.0262	0.0262	0.0262	0.0262	0.0262	0.0262	0.0262	0.0262	0.0262	0.0262	0.0262	0.0262	0.0262	0.0262		-0.0904	-0.0904	-0.0904	-0.0904	-0.0904	-0.0904	-0.0904	-0.0904	-0.0904	-0.0904	-0.0904	-0.0904	-0.0904	-0.0904	-0.0904	-0.0904
YGL156W	AMS1	-0.1625	-0.1625	-0.1625	-0.1625	-0.1625	-0.1625	-0.1625	-0.1625	-0.1625	-0.1625	-0.1625	-0.1625					0.129	0.129	0.129	0.129	0.129	0.129	0.129	0.129	0.129	0.129	-0.3345	-0.5332	-0.5332	-0.5332	-0.5332	-0.5332	-0.5332	-0.5332	-0.5332	-0.5332		-0.1787	-0.1787	-0.1787	-0.1787	-0.1787	-0.1787	-0.1787	-0.1787	-0.1787	-0.1787	-0.1787
YCL039W	GID7			-0.3706	-0.3706	-0.3706	-0.3706	-0.3706	-0.3706	-0.3706	-0.3706	-0.3706	-0.3706	-0.3706	-0.3706	-0.3706	-0.3706	-0.3706	-0.3706	-0.3706																												0.0425	0.0425
YML055W	SPC2	-0.3217	-0.3217	-0.3217	-0.3217																				-0.5281	-0.5281	-0.5281	-0.5281	-0.5281	-0.5281	-0.5281	-0.5281	-0.5281	-0.5281	-0.5281	-0.5281	-0.5281	-0.5281	-0.2951	-0.2368	-0.2368	-0.2368	-0.2368	-0.2368	-0.2368	-0.2368	-0.2368	-0.2368	-0.2368
YCR043C		-0.6213	-0.6213	-0.1586	-0.1586	-0.1586	-0.1586	-0.1586	-0.1586	-0.1586	-0.1586	-0.1586	-0.1586	-0.1586	-0.1586	-0.1586	-0.1586	-0.1586	-0.1586	-0.1586	-0.1586	-0.3682	-0.3682	-0.3682	-0.3682	-0.3682	-0.3682	-0.3682	-0.3682	-0.3682	-0.3682	-0.3682
YER009W	NTF2	0.3916	0.3916	0.3916	0.3916	0.3916	0.3916	0.3916	0.3916	0.3916	0.3916	0.3916	0.3916	0.3916	0.3916	0.3916	0.3916	0.3916	0.3916		-0.056	-0.056	-0.056	-0.056	-0.056	-0.056	-0.056	-0.056	-0.056	-0.056	-0.056	-0.056	-0.056	-0.056	-0.056	-0.056						0.1779	0.1779	0.1779	0.1779	0.1779	0.1779	0.1779	0.1779
YLR287C-A	RPS30A	-0.2974	-0.2974	-0.2974	-0.2974	-0.2974	-0.2974						-0.5808	-0.5808	-0.5808	-0.5808	-0.5808	-0.5808	-0.5808	-0.5808	-0.5808	-0.5808	-0.9067	-0.9067	-0.9067	-0.9067	-0.9067	-0.9067	-0.9067	-0.9067	-0.9067	-0.9067	-0.9067	-0.9067	-0.9067	-0.9067
YDL042C	SIR2		-1.3217	-1.3217	-1.3217	-1.3217	-1.3217	-1.3217	-1.3217	-1.3217	-1.3217	-1.3217	-1.3217	-1.3217	-1.3217	-1.3217	-1.3217	-1.3217	-1.3217			-0.5298	-0.5298	-0.5298	-0.5298	-0.5298	-0.5298	-0.5298	-0.5298	-0.5298	-0.5298	-0.5298	-0.5298	-0.5298	-0.5298	-0.5298	-0.5298	-0.5298	-0.5298									-0.8226	-0.8226
YDL046W	NPC2	-0.1518	-0.1518	0.6523	0.6523	0.6523	0.6523	0.6523	0.6523	0.6523	0.6523	0.6523	0.6523
YOR382W	FIT2		-0.4457	-0.4457	-0.4457	-0.4457	-0.4457	-0.4457	-0.4457	-0.4457	-0.4457	-0.4457	-0.4457	-0.4457	-0.4457	-0.4457	-0.4457					0.2735	0.2735	0.2735	0.2735	0.2735	0.2735	0.2735	0.2735	0.2735	0.214	-0.3217	-0.3217	-0.3217	-0.3217	-0.3217	-0.3217	-0.3217	-0.3217	-0.3217	-0.3217	-0.3217	-0.3217	-0.3217	-0.3217	-0.3217	-0.2979	-0.1787	-0.1787
YJR057W	CDC8	-0.5143	-0.5143	-0.5143	-0.5143	-0.5143																							-0.0114	-0.0114	-0.0114	-0.0114	-0.0114	-0.0114	-0.0114	-0.0114	-0.0114	-0.0114	-0.0114	-0.0114	-0.0114	-0.0114	-0.0114	-0.0114
YEL051W	VMA8	0.2548	0.2548	0.2548	0.2548	0.2548	0.2548	0.2548	0.2548	0.2548										-0.0636	-0.0636	-0.0636	-0.0636	-0.0636	-0.0636	-0.0636	-0.0636	-0.0636	-0.0636	-0.0636	-0.0636																		-0.2628
YOR020W-A		-0.3831	-0.3831	-0.3831	-0.3831	-0.3831	-0.3831	-0.3831	-0.3831	-0.3831	-0.3831	-0.2324	-0.2324	-0.2324	-0.2324	-0.2324	-0.2324	-0.2324	-0.2324	-0.2324	-0.2324																				-0.2728	-0.2728	-0.2728	-0.2728	-0.2728	-0.2728	-0.2728	-0.2728	-0.2728
YCL038C	ATG22																											-0.5627	-0.5627	-0.5627	-0.5627	-0.5627	-0.5627	-0.5627	-0.5627	-0.5627	-0.5627	-0.5627	-0.5627	-0.5627	-0.5627	-0.5627	-0.5627						-0.4529
YLR040C		-0.1878	-0.1878	-0.1878	-0.1878			0.0241	0.0241	0.0241	0.0241	0.0241	0.0241	0.0241	0.0241	0.0241	0.0241	0.0241	0.0241	0.0241	0.0241	0.0241	0.0241	0.0241	0.0241	0.9007	0.9007	0.9007	0.9007	0.9007	0.9007	0.9007	0.9007	0.9007	0.9007	0.9007	0.9007	0.9007	0.7567	0.1808	0.1808	0.1808	0.1808	0.1808	0.1808	0.1808	0.1808	0.1808	0.1808
YLR065C		-0.0922								-0.0664	-0.0664	-0.0664	-0.0664	-0.0664	-0.0664	-0.0664	-0.0664	-0.0664	-0.0664	-0.0664	-0.0664	-0.0664	0.2088	0.2088	0.2088	0.2088	0.2088	0.2088	0.2088	0.2088	0.2088	0.2088	0.2088	0.2088	0.2088	0.2088	0.2088	0.2088	0.3528	0.4488	0.4488	0.4488	0.4488	0.4488	0.4488	0.4488	0.4488	0.4488	0.4488
YOR230W	WTM1																											-2.129	-2.129	-2.129	-2.129	-2.129	-2.129	-2.129	-2.129	-2.129	-2.129	-2.129	-2.129
YGR043C	NQM1									-0.2062	-0.2062	-0.2062	-0.2062	-0.2062	-0.2062	-0.2062	-0.2062	-0.2062	-0.2062	-0.2062	-0.421	-0.6358	-0.6358	-0.6358	-0.6358	-0.6358	-0.6358	-0.6358	-0.6358	-0.6358	-0.6358	-0.6358	-0.6358	-0.6358	-0.3866	-0.2204	-0.2204	-0.2204	-0.2204	-0.2204	-0.2204	-0.2204	-0.2204	-0.2204	-0.2204	-0.2204	-0.2204	-0.2204	-0.2204
YJR010C-A	SPC1					0.7879	0.7879	0.7879	0.7879	0.7879	0.7879	0.7879	0.7879	0.7879	0.7879				-0.6753	-0.6753	-0.6753	-0.6753	-0.6753	-0.6753	-0.6753	-0.6753	-0.6753	-0.6753	-0.6753	-0.6753	-0.6753																	-0.3873	-0.3873
YPL199C			-0.4592	-0.4592	-0.4592	-0.4592	-0.4592	-0.4592	-0.4592	-0.4592	-0.4592	-0.4592	-0.4592	-0.4592	-0.4592	-0.4592	-0.4592	-0.4592	-0.4592																														-0.1884
YNL133C	FYV6																																															-1.0487	-1.0487
YLR090W	XDJ1	0.2884	0.2884	0.2884	0.2884	0.2884	0.2884	0.2884	0.2884	0.2884	0.2884	0.2884	0.2884											0.0625	0.0625	0.0625	0.0625	0.0625	0.0625	0.0625	0.0625	0.0625	0.0625	0.0625	0.0625	0.0246	-0.0702	-0.0702	-0.0702	-0.0702	-0.0702	-0.0702	-0.0702	-0.0702	-0.0702	-0.0702	-0.0702	-0.0702	-0.0702
YMR087W		-0.3217	-0.3217	-0.3217	-0.3217	-0.3217	-0.3217	-0.3217	-0.3217	-0.3217	-0.3217	-0.3217	-0.3217	-0.3217	-0.3217							-0.7176	-0.7176	-0.7176	-0.7176	-0.7176	-0.7176	-0.7176	-0.7176	-0.7176	-0.7176	-0.7176	-0.7176	-0.7176	-0.7176	-0.7176	-0.7176	-0.7176	-0.2907	-0.2907	-0.2907	-0.2907	-0.2907	-0.2907	-0.2907	-0.2907	-0.2907	-0.2907	-0.2907
YPL013C	MRPS16	-0.2672	-0.2672	-0.2672	-0.2672	-0.2672								0.3106	0.3106	0.3106	0.3106	0.3106	0.3106	0.3106	0.3106	0.3106	0.3106	0.3106	0.3106	0.3106	0.3106	0.3106	0.3106	0.3106
YDR071C	PAA1				-0.2759	-0.2759	-0.2759	-0.2759	-0.2759	-0.2759	-0.2759	-0.2759	-0.2759	-0.2759	-0.2759	-0.2759	-0.2759	-0.2759	-0.6736	-0.8724	-0.8724	-0.8724	-0.8724	-0.8724	-0.8724	-0.8724	-0.8724	-0.8724	-0.8724	-0.8724	-0.8724
YDR247W	VHS1	-1.0702	-1.0702	-1.0702	-1.0702	-1.0702	-1.0702							-1.2832	-1.2832	-1.2832	-1.2832	-1.2832	-1.2832	-1.2832	-1.2832	-1.2832	-1.2832	-1.2832	-1.2832	-1.2832	-1.2832	-1.2832	-1.2832	-1.2832	-0.9093	-0.442	-0.442	-0.442	-0.442	-0.442	-0.442	-0.442	-0.442	-0.442	-0.442	-0.442		-0.3217	-0.3217	-0.3217	-0.3217	-0.3217	-0.3217
YGL190C	CDC55							-0.4472	-0.4472	-0.4472	-0.4472	-0.4472	-0.4472	-0.4472	-0.4472	-0.4472	-0.4472	-0.4472	-0.4472	-0.4472	-0.4472	-0.4472	-0.4472
YAL008W	FUN14	-0.0929	-0.0929	-0.0929					-0.0895	-0.0895	-0.0895	-0.0895	-0.0895	-0.0895	-0.0895	-0.0895	-0.0895	-0.0895			-0.2945	-0.2945	-0.2945	-0.2945	-0.2945	-0.2945	-0.2945	-0.2945	-0.2945	-0.2945	-0.2945	-0.2945	-0.2945								0.1423	0.1423	0.1423	0.1423	0.1423	0.1423	0.1423	0.1423	0.1423
YDR111C	ALT2	-0.7064	-0.7064	-0.7064	-0.7064												-0.6551	-0.6551	-0.6551	-0.6551	-0.6551	-0.6551	-0.6551	-0.6551	-0.6551	-0.6551	-0.6551	-0.6551	-0.6551	-0.6551	-0.6551	-0.6551
YDR397C	NCB2	-0.1392	-0.1392	-0.1392	-0.1392	-0.1392	-0.1392	-0.1392	-0.1392	-0.1392	-0.1392																-0.7514	-0.7514	-0.7514	-0.7514	-0.7514	-0.7514	-0.7514	-0.7514	-0.7514	-0.7514	-0.7514	-0.7514	-0.7514	-0.7514	-0.7514	-0.7514				0.7158	0.7158	0.7158	0.7158
YLR388W	RPS29A	0.0503	0.0503	0.0503	0.0503	0.0503	0.0503	0.0503	0.0503	0.0503	0.0503	0.0503	0.0503	0.0503			0.0691	0.0691	0.0691	0.0691	0.0691	0.0691	0.0691	0.0691	0.0691	0.0691	0.0691	0.0691	0.0691	0.0691	0.0691
YNL220W	ADE12	-0.3217
YJL121C	RPE1	-0.5215						0.2034	0.2034	0.2034	0.2034	0.2034	0.2034	0.2034	0.2034	0.2034	0.2034	0.2034	0.2034	0.2477	0.2477	0.2477	0.2477	0.2477	0.2477	0.2477	0.2477	0.2477	0.2477	0.2477	0.2477	0.2477	0.2477	0.2477	0.2477	0.2477	0.2477	0.2477			0.4668	0.4668	0.4668	0.4668	0.4668	0.4668	0.4668	0.4668	0.1915
YKL138C-A	HSK3	0.1731	0.1731	0.1731	0.1731	0.1731	0.1731	0.1731	0.1731	0.1731	0.1731	0.1731						0.1413	0.1413	0.1413	0.1413	0.1413	0.1413	0.1413	0.1413	0.1413	0.1413	0.1413	0.1413					-0.4852	-0.4852	-0.4852	-0.4852	-0.4852	-0.4852	-0.4852	-0.4852	-0.4852	-0.4852	-0.4852	-0.4852	-0.4852	-0.4852	-0.4852
YNL149C	PGA2	-0.6952	-0.6952	-0.6952	-0.6952	-0.6952	-0.6952	-0.6952	-0.6952																																							-0.4286	-0.4286
YGR109C	CLB6						-0.9632	-0.9632	-0.9632	-0.9632	-0.9632	-0.9632	-0.9632	-0.9632	-0.9632	-0.9632	-0.9632		-0.6778	-0.6778	-0.6778	-0.6778	-0.6778	-0.6778	-0.6778	-0.6778	-0.6778	-0.8193	-0.9608	-0.9608	-0.9608	-0.9608	-0.9608	-0.9608	-0.9608	-0.9608	-0.9608	-0.9608	-0.9608	-0.9608	-0.9608	-0.9608	-0.9608	-0.9608
YGR007W	MUQ1	-0.0059	-0.0059	-0.0059	-0.0059	-0.0059	-0.0059	-0.0059	-0.0059	-0.0059	-0.0059	-0.0059	-0.0059	-0.0059	-0.0059	-0.0059	-0.0059	-0.0059				0.1929	0.1929	0.1929	0.1929	0.1929	0.1929	0.1929	0.1929	0.1929	0.1929	0.1929	0.1929									-0.0755	-0.0755	-0.0755	-0.0755	-0.0755	-0.0755	-0.0755	-0.0755
YLR193C	UPS1	-0.2982	-0.2982	-0.2982	-0.2982	-0.2982	-0.2982	-0.2982	-0.2982	-0.2982	-0.2982	-0.2982	-0.2982	-0.2982	-0.2982	-0.2982					-0.5765	-0.5765	-0.5765	-0.5765	-0.5765	-0.5765	-0.5765	-0.5765	-0.5765	-0.5765	-0.5765	-0.5765	-0.5765	-0.5765	-0.5765	-0.5765	-0.5765	-0.5765											-0.1537
YPR004C		0.101	0.101	-0.2342	-0.2342	-0.2342	-0.2342	-0.2342	-0.2342	-0.2342	-0.2342	-0.2342	-0.2342	-0.2342	-0.2342	-0.2342	-0.2342	-0.2342	-0.2342	-0.2342	-0.2342			0.1637	0.1637	0.1637	0.1637	0.1637	0.1637	0.1637	0.1637	0.1637	0.1637	0.1637	0.1637	0.1637	0.1637	0.1637
YJR085C		-0.3217	-0.3217	-0.3217	-0.3217	-0.3217	-0.3217	-0.3217															-0.129	-0.129	-0.129	-0.129	-0.129	-0.129	-0.129	-0.129	-0.129	-0.129	-0.129	-0.129	-0.129	-0.129	-0.129	-0.129	-0.129							0.8158	0.8158	0.8158	0.8158
YNL072W	RNH201	-0.1647	-0.1647	-0.1647	-0.1647	-0.1647	-0.1647	-0.1647	-0.1647													-0.3446	-0.3446	-0.3446	-0.3446	-0.3446	-0.3446	-0.3446	-0.3446	-0.3446	-0.3446	-0.3446	-0.3446	-0.3446	-0.3446	-0.3446	-0.3446	-0.3446										-0.0607	-0.0607
YBL098W	BNA4	-0.3217	-0.3217	-0.3217	-0.3217	-0.3217	-0.3217	-0.3217																						-0.1842	-0.1842	-0.1842	-0.1842	-0.1842	-0.1842	-0.1842	-0.1842	-0.1842	-0.1842	-0.1842	-0.1842	-0.1842	-0.1842	-0.1842	-0.1842
YNL309W	STB1	0.6217	0.6217	0.6217	0.6217	0.6217	0.6217	0.6217	0.6217	0.6217	0.6217	0.6217	0.6217	0.6217	0.6217	0.6217	0.6217	0.6217			0.1612	0.1612	0.1612	0.1612	0.1612	0.1612	0.1612	0.1612	0.1612	0.1612	0.1612	0.1612	0.1612	0.1612	0.1612	0.1612	0.1612	0.3559	0.4857	0.4857	0.4857	0.4857	0.4857	0.4857	0.4857	0.4857	0.4857
YNL138W-A	YSF3	0.0073	0.0073	0.0073	0.0073	0.0073	0.0073	0.0073	0.0073	0.0073	0.0073	0.0073	0.0073	0.0073	0.0073	0.0073	0.0073	0.0073		-0.1573	-0.1573	-0.1573	-0.1573	-0.1573	-0.1573	-0.1573	-0.1573	-0.1573	-0.1573	-0.1573											0.1258	0.1258	0.1258	0.1258	0.1258	0.1258	0.1258	0.1258	0.1258
YHR021C	RPS27B
YPL232W	SSO1	-0.6627	-0.6627	-0.6627	-0.6627	-0.7715	-0.8584	-0.8584	-0.8584	-0.8584	-0.8584	-0.8584	-0.8584	-0.8584	-0.8584	-0.8584	-0.8584	-0.8584																															-0.3459
YBR282W	MRPL27	0.4268	0.4268	0.4268	0.4268	0.4268	0.4268	0.4268	0.4268	0.4268	0.4268	0.4268	0.4268	0.4268	0.4268	0.4268	0.4268												0.0695	0.0695	0.0695	0.0695	0.0695	0.0695	0.0695	0.0695	0.0695	0.0695	0.0695							0.0503	0.0503	0.0503	0.0503
YEL030W	ECM10	-0.588	-0.588	-0.588	-0.588	-0.588	-0.588	-0.588	-0.588	-0.631	-0.631	-0.631	-0.631	-0.631	-0.631	-0.631	-0.631	-0.631	-0.631	-0.631	-0.631
YFL005W	SEC4	-0.4554	-0.4554	-0.4554	-0.4554	-0.4554	-0.4554	-0.4554	-0.4554	-0.4554	-0.4554	-0.4554	-0.4554	-0.4554	-0.4554	-0.4554	-0.0791	-0.0791	-0.0791	-0.0791	-0.0791	-0.0791	-0.0791	-0.0791	-0.0791	-0.0791	-0.0791																		-0.3997	-0.3997	-0.3997	-0.3997	-0.3997
YMR117C	SPC24	0.4275	0.4275	0.0057	-0.163	-0.163	-0.163	-0.163	-0.163	-0.163	-0.163	-0.163	-0.163	-0.163	-0.163	-0.163	-0.163	-0.163	-0.163	-0.2336	-0.2336	-0.2336	-0.2336	-0.2336	-0.2336	-0.2336	-0.2336	-0.2336	-0.2336	-0.2336	-0.2336	-0.2336	-0.2336	-0.2336	-0.2336	-0.2336
YDR287W	INM2	-0.1983	-0.1983	-0.1983	-0.1983	-0.1983	-0.1983	-0.1983	-0.1983	-0.1983	-0.1983	-0.1983	-0.1983	-0.1983	-0.1983				-0.2702	-0.2702	-0.2702	-0.2702	-0.2702	-0.2702	-0.2702	-0.2702	-0.2702	-0.2702	-0.2702	-0.2702	-0.2702	-0.2702	-0.2702					-0.2822	-0.2822	-0.2822	-0.2822	-0.2822	-0.2822	-0.2822	-0.2822	-0.2822	-0.2822	-0.2822	-0.2822
YPL071C		0.5227	0.5227	0.6028	0.6028	0.6028	0.6028	0.6028	0.6028	0.6028	0.6028	0.6028	0.6028	0.6028	0.6028	0.9262	0.9262	0.9262	0.9262	0.9262	0.9262	0.9262	0.9262	0.9262	0.2914	0.0193	0.0193	0.0193	0.0193	0.0193	0.0193	0.0193	0.0193	0.0193	0.0193	0.0193	0.0193	0.0193
YBL092W	RPL32	0.3888
YEL026W	SNU13																				-0.7912	-0.7912	-0.7912	-0.7912	-0.7912	-0.7912	-0.7912	-0.7912	-0.7912	-0.7912	-0.7912	-0.7912	-0.7912
YDR423C	CAD1	-0.0114	-0.0114	-0.0114	-0.0114	-0.0114	-0.0114	-0.0114	-0.0114	-0.0114	-0.0114						-0.4459	-0.4459	-0.4459	-0.4459	-0.4459	-0.4459	-0.4459	-0.4459	-0.4459	-0.4459	-0.4459	-0.4459	-0.4459	-0.4459	-0.4459	-0.4459	-0.4459	-0.4459	-0.4459													0.0491	0.0491
YGR201C		-0.5252	-0.5252	-0.5252	-0.5252	-0.5252	-0.5252	-0.5252		-0.2457	-0.2457	-0.2457	-0.2457	-0.2457	-0.2457	-0.2457	-0.2457	-0.2457	-0.2457	-0.2457	-0.2457	-0.2457	-0.2457	-0.2457	-0.2457	-0.2457	-0.2609	-0.3217	-0.3217	-0.3217	-0.3217	-0.3217	-0.3217	-0.3217	-0.3217	-0.3217	-0.3217	-0.3217	-0.1962	-0.1962	-0.1962	-0.1962	-0.1962	-0.1962	-0.1962	-0.1962	-0.1962	-0.1962	-0.1962
YGL028C	SCW11															-0.6112	-0.6112	-0.6112	-0.6112	-0.6112	-0.6112	-0.6112	-0.6112	-0.6112	-0.6112	-0.6112	-0.6112	-0.6112	-0.6112	-0.6112	-0.6112	-0.6112				-1.3831	-1.3831	-1.3831	-1.3831	-1.3831	-1.3831	-1.3831	-1.3831	-1.3831	-1.3831	-1.3831	-1.3831	-1.3831	-1.3831
YER156C			-0.2437	-0.2437	-0.2437	-0.2437	-0.2437	-0.2437	-0.2437	-0.2437	-0.2437	-0.2437	-0.2437													-0.2301	-0.2301	-0.2301	-0.2301	-0.2301	-0.2301	-0.2301	-0.2301	-0.2301	-0.2301	-0.2301	-0.2301	-0.2301	-0.2301										0.012
YGR247W	CPD1								-0.2504	-0.2504	-0.2504	-0.2504	-0.2504	-0.2504	-0.2504	-0.2504	-0.2504	-0.2504	-0.2504	-0.2504	-0.2504	-0.2504	-0.2504	-0.2504	-0.2504	-0.2504							0.6783	0.6783	0.6783	0.6783	0.6783	0.6783	0.6783	0.6783	0.6783	0.6783	0.6783	0.6783	0.6783	0.6783	0.6783	0.9096	0.9096
YJL137C	GLG2	-0.5	-0.5	-0.5	-0.5	-0.5	-0.5	-0.5	-0.5	-0.5	-0.5	-0.5	-0.5	-0.5	-0.5	-0.5															-0.0738	-0.0738	-0.0738	-0.0738	-0.0738	-0.0738	-0.0738	-0.0738	-0.0738	-0.0738	-0.0738	-0.0738	-0.0738	-0.0738	-0.0738	-0.6	-0.6	-0.6	-0.6
YDL213C	NOP6	-0.3675	-0.3675	-0.3675	-0.3675	-0.3675	-0.3788	-0.3957	-0.3957	-0.3957	-0.3957	-0.3957	-0.3957	-0.3957	-0.3957	-0.3957	-0.3957	-0.3957	-0.3957	-0.3957	-0.3957	-0.3957		-0.2238	-0.2238	-0.2238	-0.2238	-0.2238	-0.2238	-0.2238	-0.2238	-0.2238	-0.2238		-0.4968	-0.4968	-0.4968	-0.4968	-0.4968	-0.4968	-0.4968	-0.4968	-0.4968	-0.4968	-0.4968
YBR093C	PHO5	-0.5374	-0.5374	-0.5374	-0.5374	-0.5374	-0.5374	-0.5374	-0.5374	-0.5374	-0.5374	-0.5374	-0.5374	-0.5374	-0.5374	-0.5374											-0.9443	-0.9443	-0.9443	-0.9443	-0.9443	-0.9443	-0.9443	-0.9443	-0.9443	-0.9443	-0.9443	-0.9443	-0.9443	-0.9443	-0.9208	-0.9169	-0.9169	-0.9169	-0.9169	-0.9169	-0.9169	-0.9169	-0.9169
YLR432W	IMD3							-0.7888	-0.7888	-0.7888	-0.7888	-0.7888	-0.7888	-0.7888	-0.7888	-0.7888	-0.7888	-0.7888	-0.7888	-0.7888	-0.7888	-0.7888	-0.7888
YDR313C	PIB1	-0.6599	-0.6599	-0.6599	-0.6599	-0.6599	-0.6599	-0.6599	-0.6599	-0.6599	-0.6599	-0.6599	-0.6599	-0.6599			-0.3217	-0.3217	-0.3217	-0.3217	-0.3217	-0.3217	-0.3217	-0.3217	-0.3217	-0.3217	-0.3217	-0.3217	-0.3217	-0.3217	-0.3217	-0.3217															-0.4529	-0.4529	-0.4529
YKL159C	RCN1	0.4742	0.4742	0.4742	0.4742	0.4742	0.4742	0.4742	0.4742	0.4742	0.4742						0.0204	0.0204	0.0204	0.0204	0.0204	0.0204	0.0204	0.0204	0.0204	0.0204	0.0204					0.0632	0.0632	0.0632	0.0632	0.0632	0.0632	0.0632	0.0632	0.0632	0.0632	0.0632	0.0632	0.0632	0.0632	0.0632	0.0632
YJL026W	RNR2	-1.3858	-1.3858	-1.3858	-1.3858	-1.3858	-1.3858	-1.3858																					-1.028	-1.028	-1.028	-1.028	-1.028	-1.028	-1.028	-1.028	-1.028	-1.028	-1.0229	-1.0076	-1.0076	-1.0076	-1.0076	-1.0076	-1.0076	-1.0076	-1.0076	-1.0076	-1.0076
YDR380W	ARO10			-1.5298	-1.5298	-1.5298	-1.5298	-1.5298	-1.5298	-1.5298	-1.5298	-1.5298	-1.5298	-1.5298	-1.5298	-1.5298	-1.5298	-1.5298			-0.6961	-0.6961	-0.6961	-0.6961	-0.6961	-0.6961	-0.6961	-0.6961	-0.6961	-0.6961	-0.6961	-0.6961	-0.6961	-0.6961	-0.6961	-0.6961	-0.6961	-0.6961	-0.9777	-0.9777	-0.9777	-0.9777	-0.9777	-0.9777	-0.9777	-0.9777	-0.9777	-0.9777	-0.9777
YGL057C		-0.3648	-0.3648	-0.3648	-0.3648		-0.512	-0.512	-0.512	-0.512	-0.512	-0.512	-0.512	-0.512	-0.512	-0.512	-0.512	-0.512	-0.512	-0.512	-0.512	-0.512	-0.4462	-0.4133	-0.4133	-0.4133	-0.4133	-0.4133	-0.4133	-0.4133	-0.4133	-0.4133	-0.4133	-0.4133	-0.4133													-0.4877	-0.4877
YMR281W	GPI12															-0.1518	-0.1518	-0.1518	-0.1518	-0.1518	-0.1518	-0.1518	-0.1518	-0.1518	-0.1518	-0.1518	-0.1518	-0.1518	-0.1518	-0.1518	-0.1518	-0.1518	-0.1518
YOR096W	RPS7A
YOR163W	DDP1	0.0002	0.0002												-0.0525	-0.0525	-0.0525	-0.0525	-0.0525	-0.0525	-0.0525	-0.0525	-0.0525	-0.0525	-0.0525				0.0002	0.0002	0.0002	0.0002	0.0002	0.0002	0.0002	0.0002	0.0002	0.0002	0.0002	0.0002	0.0002	0.0002	0.0002	0.0002	0.0002
YCR003W	MRPL32	0.1001	0.1001	0.1001	0.1001	0.1001	0.1001	0.1001	0.1001	0.1001	0.1001	0.1001	0.1001				0.0494	0.0494	0.0494	0.0494	0.0494	0.0494	0.0494	0.0494	0.0494	0.0494	0.0494	0.0494	0.0494	0.0494	0.0494	0.0494	0.0494	0.0494										0.5852	0.5852	0.5852	0.5852	0.5852	0.5852
YGL157W		-0.1234	-0.1234	-0.1234	-0.1234	-0.1234	-0.1234	-0.1234	-0.1234	-0.1234	-0.1234	-0.1234	-0.1234	-0.0516	-0.0516	-0.0516	-0.0516	-0.0516	-0.0516	-0.0516	-0.0516	-0.0516	-0.0516	-0.0516				-0.6298	-0.6298	-0.6298	-0.6298	-0.6298	-0.6298	-0.6298	-0.6298	-0.6298	-0.6298	-0.6298	-0.6298										0.2744
YEL038W	UTR4		-0.4212	-0.4212	-0.4212	-0.4212	-0.4212	-0.4212	-0.4212	-0.4212	-0.4212	-0.4212	-0.4212	-0.0744	0.7349	0.7349	0.7349	0.7349	0.7349	0.7349	0.7349	0.7349	0.7349	0.7349	0.7349	0.7349	0.4907	0.2466	0.2466	0.2466	0.2466	0.2466	0.2466	0.2466	0.2466
YMR071C	TVP18	0.154	0.154	-0.1939	-0.1939	-0.1939	-0.1939	-0.1939	-0.1939	-0.1939	-0.1939	-0.1939	-0.1939	-0.1939	-0.1939	-0.1939	-0.4038	-0.7186	-0.7186	-0.7186	-0.7186	-0.7186	-0.7186	-0.7186	-0.7186	-0.7186	-0.7186	-0.7186	-0.7186	-0.7186	-0.7186	-0.7186	-0.7186	-0.7186
YMR264W	CUE1	0.1308	0.1308	0.1308	0.1308	0.1308	0.1308	0.1308	0.1308	-0.0124	-0.0738	-0.0738	-0.0738	-0.0738	-0.0738	-0.0738	-0.0738	-0.0738	-0.0738	-0.0738	-0.0738	-0.0738	0.5061	0.5061	0.5061	0.5061	0.5061	0.5061	0.5061	0.5061	0.5061	0.5061	0.4339	0.0002	0.0002	0.0002	0.0002	0.0002	0.0002	0.0002	0.0002	0.0002	0.0002	0.0002				0.0234	0.0234
YLR003C	CMS1			0.1824	0.1824	0.1824	0.1824	0.1824	0.1824	0.1824	0.1824	0.1824	0.1824	0.1824	0.1824	0.1824	0.1824	0.1824	0.1824				-0.0487	-0.0487	-0.0487	-0.0487	-0.0487	-0.0487	-0.0487	-0.0487	-0.0487	-0.0487	-0.0487	-0.0487	-0.0487
YDR523C	SPS1																																																-0.3858
YMR183C	SSO2	-0.5745	-0.5745	-0.5745	-0.5745	-0.5745	-0.5745	-0.5745	-0.5745	-0.5745	-0.5745	-0.5745			-0.2212	-0.2212	-0.2212	-0.2212	-0.2212	-0.2212	-0.2212	-0.2212	-0.2212	-0.2212	-0.2212	-0.2212	-0.2212	-0.2212	-0.2212	-0.2212	-0.2212					0.2402	0.2402	0.2402	0.2402	0.2402	0.2402	0.2402	0.2402	0.2402	0.2402	0.2402	0.2402	0.2402	0.2402
YIL002W-A		-0.1361	-0.1361	-0.1361	-0.1361	-0.1361	-0.1361											-0.1041	-0.1041	-0.1041	-0.1041	-0.1041	-0.1041	-0.1041	-0.1041	-0.1041	-0.1041	-0.1041	-0.3806	-0.3806	-0.3806	-0.3806	-0.3806	-0.3806	-0.3806	-0.3806	-0.3806	-0.3806	-0.3806	-0.3806	-0.3806	-0.3806	-0.3806	-0.3806	-0.3806	-0.3806
YKL170W	MRPL38	-0.2672	-0.2672	-0.2672	-0.2672	-0.2672	-0.2672	-0.477	-0.477	-0.477	-0.477	-0.477	-0.477	-0.477	-0.477	-0.477	-0.477	-0.477	-0.477	-0.477	-0.477	-0.477	-0.477	-0.477													0.6783	0.6783	0.6783	0.6783	0.6783	0.6783	0.6783	0.6783	0.6783	0.6783	0.6783	0.6783	0.6783
YPL031C	PHO85	-0.5191	-0.5191	-0.5191	-0.5191	-0.5191	-0.5191	-0.5191	-0.5191	-0.5191	-0.5191	-0.5191	-0.5191	-0.5191	-0.5191	-0.5191												-0.7561	-0.7561	-0.7561	-0.7561	-0.7561	-0.7561	-0.7561	-0.7561	-0.7561	-0.7561	-0.7561	-0.7561	-0.7561	-0.7561	-0.7561	-0.7561
YJR095W	SFC1													-0.7087	-0.7087	-0.7087	-0.7087	-0.7087	-0.7087	-0.7087	-0.7087	-0.7087	-0.7087	-0.7087	-0.7087	-0.7087	-0.7087	-0.7087	-0.7087	-0.7087	0.2447	0.2447	0.2447	0.2447	0.2447	0.2447	0.2447	0.2447	0.2447	0.2447	0.2447	0.2447	0.2998	0.2998	0.2998	0.2998	0.2998	0.2998	0.2998
YGL136C	MRM2															-0.4661	-0.4661	-0.4661	-0.4661	-0.4661	-0.4661	-0.4661	-0.4661	-0.4661	-0.4661	-0.4661	-0.4661	-0.4661	-0.4661	-0.4661	-0.4661	-0.4661	-0.4661											0.545	0.545	0.545	0.545	0.545	0.545
YGR230W	BNS1																												-0.6141	-0.6141	-0.6141	-0.6141	-0.6141	-0.6141	-0.6141	-0.6141	-0.6141	-0.6141	-0.6141	-0.6141	-0.6141	-0.6141	-0.6141
YJR123W	RPS5
YGR205W		-0.8724	-0.8724	-0.8724	-0.8724	-0.8724	-0.8724	-0.8724	-0.8724	-0.0717	-0.0717	-0.0717	-0.0717	-0.0717	-0.0717	-0.0717	-0.0717	-0.0717	-0.0717	-0.0717	-0.0717	-0.0717
YLR075W	RPL10	-0.4929	-0.7222	-0.7222	-0.7222	-0.7222	-0.7222	-0.7222	-0.7222	-0.7222	-0.7222	-0.7222	-0.7222	-0.7222	-0.7222	-0.7222	-0.7222
YFR041C	ERJ5	-0.9244	-0.9244	-0.9244	-0.9244	-0.9244	-0.9244			0.0102	0.0102	0.0102	0.0102	0.0102	0.0102	0.0102	0.0102	0.0102	0.0102	0.0102	0.0102	0.0102	0.0102	0.0102	0.0102	0.0102	0.0102		-0.1102	-0.1102	-0.1102	-0.1102	-0.1102	-0.1102	-0.1102	-0.1102	-0.1102	-0.1102	-0.1102	-0.1102	-0.1102	-0.1102	-0.1102	-0.1102
YER095W	RAD51	0.2633	0.2633	0.2633	0.2633	0.186	0.1731	0.1731	0.1731	0.1731	0.1731	0.1731	0.1731	0.1731	0.1731	0.1731	-0.1508	-0.9067	-0.9067	-0.9067	-0.9067	-0.9067	-0.9067	-0.9067	-0.9067	-0.9067	-0.9067	-0.9067	-0.9067	-0.9067	-0.9067	-0.9067	-0.8262	-0.5046	-0.5046	-0.5046	-0.5046	-0.5046	-0.5046	-0.5046	-0.5046	-0.5046	-0.5046						-0.015
YPL189C-A	COA2	-0.0958	-0.0958		-0.1247	-0.1247	-0.1247	-0.1247	-0.1247	-0.1247	-0.1247	-0.1247	-0.1247	-0.1247	-0.1247
YGR118W	RPS23A	-0.253	-0.253	0.2824	0.2824	0.2824	0.2824	0.2824	0.2824	0.2824	0.2824	0.2824	0.2824
YGL200C	EMP24	-0.1201	-0.1201	-0.1201	-0.1201	-0.1201	-0.1201	-0.1201	-0.1201	-0.1201	-0.1201	-0.1201	-0.1201	-0.1201	-0.1201	-0.1201	-0.3865	-0.3865	-0.3865	-0.3865	-0.3865	-0.3865	-0.3865	-0.3865	-0.3865	-0.3865	-0.3865	-0.3865	-0.3865	-0.3865	-0.3865	-0.3865
YIL055C
YGL230C					-0.6894	-0.6894	-0.6894	-0.6894	-0.6894	-0.6894	-0.6894	-0.6894	-0.6894	-0.6382	-0.5187	-0.5187	-0.5187	-0.5187	-0.5187	-0.5187	-0.5187	-0.5187	-0.5187	-0.5187	-0.5187	-0.5187	-0.5187	-0.5187	-0.5187	-0.5187	-0.5187
YPL234C	TFP3						-1.0587	-1.0587	-1.0587	-1.0587	-1.0587	-1.0587	-1.0587	-1.0587	-1.0587	-1.0587	-1.0587		-0.0379	-0.0379	-0.0379	-0.0379	-0.0379	-0.0379	-0.0379	-0.0379	-0.0379	-0.0865	-0.2811	-0.2811	-0.2811	-0.2811	-0.2811	-0.2811	-0.2811	-0.2811	-0.2811	-0.2811	-0.2811	-0.2811	-0.2811	-0.2811	-0.2811	-0.2811	-0.2811
YIL089W		-0.165	-0.165	-0.165	-0.165	-0.165	-0.165	-0.165	-0.165	-0.165
YGR232W	NAS6	0.0002	0.0002	0.0002	0.0002	0.0002	0.0002	0.0002	0.0002	0.0002	0.0002	0.0002	0.0002	0.0002	0.0002										-0.4437	-0.4437	-0.4437	-0.4437	-0.4437	-0.4437	-0.4437	-0.4437	-0.4437	-0.4437	-0.4437	-0.4437	-0.4437	-0.4437
YEL050C	RML2		0.0409	0.0409	0.0409	0.0409	0.0409	0.0409	0.0409	0.0409	0.0409	0.0409	0.0409	0.0409	0.0409	0.0409	0.0409	0.0409	-0.4565	-0.6696	-0.6696	-0.6696	-0.6696	-0.6696	-0.6696	-0.6696	-0.6696	-0.6696
YNL211C		-0.089	-0.089	-0.089	-0.089	-0.089	-0.089	-0.089	-0.089	-0.089	-0.089	-0.089	-0.089	-0.089	-0.089	-0.089	-0.089	-0.089	-0.5748	-0.7367	-0.7367	-0.7367	-0.7367	-0.7367	-0.7367	-0.7367	-0.7367	-0.7367	-0.7367	-0.7367	-0.7367	-0.7367	-0.7367	-0.7367	-0.7367	-0.7367
YOR064C	YNG1	-0.4661	-0.4661	-0.4661	-0.4661	-0.4661	-0.4661								-0.5847	-0.5847	-0.5847	-0.5847	-0.5847	-0.5847	-0.5847	-0.5847	-0.5847	-0.5847	-0.5847	-0.5847
YGR248W	SOL4	-0.2457	-0.2457	-0.2457	-0.2457	-0.2457	-0.2457	-0.2457	-0.2457	-0.2457	-0.2457	-0.2457	-0.2457	-0.2457			0.0002	0.0002	0.0002	0.0002	0.0002	0.0002	0.0002	0.0002	0.0002	0.0002	0.0002	0.0002						0.2402	0.2402	0.2402	0.2402	0.2402	0.2402	0.2402	0.2402	0.2402	0.2402	0.2402	-0.0114	-0.0114	-0.0114	-0.0114	-0.0114
YKR044W	UIP5	-0.5143	-0.5143	-0.5143	-0.5143	-0.5143	-0.5143	-0.5143	-0.5143	-0.5143	-0.5143		-0.9406	-0.9406	-0.9406	-0.9406	-0.9406	-0.9406	-0.9406	-0.9406	-0.9406	-0.9406	-0.9406	-0.9406	-0.9406	-0.9406	-0.9406	-0.9406	-0.9406	-0.8511	-0.493	-0.493	-0.493	-0.493	-0.493	-0.493	-0.493	-0.493	-0.493	-0.493	-0.493	-0.493	-0.493
YHL032C	GUT1				-0.3058	-0.3058	-0.3058	-0.3058	-0.3058	-0.3058	-0.3058	-0.3058	-0.3058	-0.3058	-0.3058	-0.3058	-0.3058	-0.3058	-0.3058	-0.3058	-0.3058			-0.3858	-0.3858	-0.3858	-0.3858	-0.3858	-0.3858	-0.3858	-0.3858	-0.3858	-0.3858	-0.3858	-0.3858	-0.3858	-0.3858	-0.3858	-0.3858	-0.3858	-0.3858
YOL103W	ITR2
YNL016W	PUB1												-1.129	-1.129	-1.129	-1.129	-1.129	-1.129	-1.129	-1.129	-1.129	-1.129	-1.129	-1.129	-1.129
YHR085W	IPI1	-0.4148																															-0.3217	-0.3217	-0.3217	-0.3217	-0.3217	-0.3217	-0.3217	-0.3217	-0.3217	-0.3217	-0.3217	-0.3217	-0.3217	-0.3217
YOL014W		-0.8023	-0.8023	-0.8023	-0.8023	-0.8023	-0.8023	-0.8023	-0.8023			-0.3831	-0.3831	-0.3831	-0.3831	-0.3831	-0.3831	-0.3831	-0.3831	-0.3831	-0.3831	-0.3063	0.3846	0.3846	0.3846	0.3846	0.3846	0.3846	0.3846	0.3846	0.3846	0.3846	0.3846	0.3846	0.3846	0.3846	0.3846	0.3846	0.3846										-0.1697
YCR007C																																						-0.2148	-0.2148	-0.2148	-0.2148	-0.2148	-0.2148	-0.2148	-0.2148	-0.2148	-0.2148	-0.2148	-0.2148
YPR006C	ICL2	-0.2919	-0.2919	-0.2919	-0.2919	-0.2919	-0.2919	-0.2919	-0.2919	-0.2919	-0.2919	0.0839	0.0839	0.0839	0.0839	0.0839	0.0839	0.0839	0.0839	0.0839	0.0839	0.0839	0.0839		0.6783	0.6783	0.6783	0.6783	0.6783	0.6783	0.6783	0.6783	0.6783	0.3858	0.0933	0.0933	0.0933	0.0933	0.0933	0.0933	0.0933	0.0933	0.0933	0.0933		-0.3957	-0.3957	-0.3957	-0.3957
YOR074C	CDC21	0.2377	0.2377		0.2633	0.2633	0.2633	0.2633	0.2633	0.2633	0.2633	0.2633	0.2633	0.2633	0.2633	0.2633	0.2633	0.2633	0.2633	0.2633	0.2633	0.2633	0.2633			0.2434	0.2434	0.2434	0.2434	0.2434	0.2434	0.2434	0.2434	0.2434	0.2434	0.2434	0.2434	0.2434	0.2434	0.2434	0.2434
YLR344W	RPL26A	-1.0807	-1.0807	-1.0807	-1.0807	-1.0807	-1.0807	-1.0807	-1.0807	-1.0807	-1.0807	-1.0807	-1.0807	-1.0807	-1.0807	-1.0807	-1.0807	-1.0807
YHR142W	CHS7																																						-0.7523	-0.7523	-0.7523	-0.7523	-0.7523	-0.7523	-0.7523	-0.7523	-0.7523	-0.7523	-0.7523
YEL025C			0.1106	0.1106	0.1106	0.1106	0.1106	0.1106	0.1106	0.1106	0.1106	0.1106	0.1106	0.1106	0.1106	0.1106	0.1106	0.1106						1.2285	1.2285	1.2285	1.2285	1.2285	1.2285	1.2285	1.2285	1.2285	1.2285	1.2285	0.3888	0.3888	0.3888	0.3888	0.3888	0.3888	0.3888	0.3888	0.3888	0.3888	0.3888	0.3888
YGR169C-A								0.1106	0.1106	0.1106	0.1106	0.1106	0.1106	0.1106	0.1106	0.1106	0.1106	0.1106	0.1106	0.1106	0.1106	0.1106	0.1106
YOR234C	RPL33B
YGL184C	STR3	-0.5143	-0.5143	-0.5143	-0.5143	-0.5143	-0.5143	-0.5143	-0.5143	-0.5143	-0.5143	-0.5143	-0.5143	-0.5143	-0.5143								-0.2576	-0.2576	-0.2576	-0.2576	-0.2576	-0.2576	-0.2576	-0.2576	-0.2576	-0.2576	-0.2576	0.0751	0.3247	0.3247	0.3247	0.3247	0.3247	0.3247	0.3247	0.3247	0.3247	0.3247			-0.5769	-0.5769	-0.5769
YGR058W	PEF1			-0.2692	-0.2692	-0.2692	-0.2692	-0.2692	-0.2692	-0.2692	-0.2692	-0.2692	-0.2692	-0.2692				0.0831	0.0831	0.0831	0.0831	0.0831	0.0831	0.0831	0.0831	0.0831	0.0831	0.0831			-0.0076	-0.0076	-0.0076	-0.0076	-0.0076	-0.0076	-0.0076	-0.0076	-0.0076	-0.0076	-0.0076								0.1457
YKR091W	SRL3	-0.1557	-0.1557	-0.1557	-0.1557		-0.476	-0.476	-0.476	-0.476	-0.476	-0.476	-0.476	-0.476	-0.476	-0.476	-0.476	-0.476	-0.476	-0.476	-0.476	-0.476	-0.476	-0.476		-0.8623	-0.8623	-0.8623	-0.8623	-0.8623	-0.8623	-0.8623	-0.8623	-0.8623	-0.8623	-0.8623	-0.8623
YIL046W	MET30								-0.1896	-0.1896	-0.1896	-0.1896	-0.1896	-0.1896	-0.1896	-0.1896	-0.1896	-0.1896	-0.1896	-0.1896	-0.1896	-0.3487	-0.3487	-0.3487	-0.3487	-0.3487	-0.3487	-0.3487	-0.3487	-0.3487	-0.5589	-0.8742	-0.8742	-0.8742	-0.8742	-0.8742	-0.8742	-0.8742	-0.8742	-0.8742	-0.8742
YGR041W	BUD9																									-0.3217	-0.3217	-0.3217	-0.3217	-0.3217	-0.3217	-0.3217	-0.3217	-0.3217	-0.3217	-0.3217	-0.3217	-0.3217	-0.3217	-0.3217	-0.3217	-0.3217	-0.3217
YJL212C	OPT1	-0.8968	-0.8968	-0.8968	-0.8968	-0.8968	-0.8968	-0.8968	-0.8968	-0.8968	-0.8968														-0.8719	-0.8719	-0.8719	-0.8719	-0.8719	-0.8719	-0.8719	-0.8719	-0.8719	-0.8719	-0.8719	-0.8719	-0.8719	-0.8719	-0.8719	-0.8719	-0.8719			-0.1612	-0.1612	-0.1612	-0.1612	-0.1612	-0.1612
YNL002C	RLP7				0.0409	0.0409	0.0409	0.0409	0.0409	0.0409	0.0409	0.0409	0.0409	0.0409	0.0409									-0.2121	-0.2121	-0.2121	-0.2121	-0.2121	-0.2121	-0.2121	-0.2121	-0.2121	-0.2121	-0.2121
YGR126W					-0.5112	-0.5112	-0.5112	-0.5112	-0.5112	-0.5112	-0.5112	-0.5112	-0.5112	-0.5112	-0.5112	-0.5112	-0.5112	-0.578	-0.578	-0.578	-0.578	-0.578	-0.578	-0.578	-0.578	-0.578	-0.578	0.3157	0.3157	0.3157	0.3157	0.3157	0.3157	0.3157	0.3157	0.3157	0.3157	0.3157			-0.4327	-0.4327	-0.4327	-0.4327	-0.4327	-0.4327	-0.4327	-0.4327	-0.4327
YPL091W	GLR1	-0.7912	-0.7912	-0.7912	-0.7912	-0.7912	-0.7912	-0.7912	-0.7912	-0.7912					-0.7665	-0.7665	-0.7665	-0.7665	-0.7665	-0.7665	-0.7665	-0.7665	-0.7665	-0.7665	-0.7665		-0.7176	-0.7176	-0.7176	-0.7176	-0.7176	-0.7176	-0.7176	-0.7176	-0.7176	-0.7176	-0.7176
YPL133C	RDS2	0.0557	0.0557	0.0557	0.0557	0.0557	0.0557	0.0557	0.0557	0.0557	0.0557	0.0557	0.0557	0.0557	0.0557	0.0557	0.0557			0.0212	0.0212	0.0212	0.0212	0.0212	0.0212	0.0212	0.0212	0.0212	0.0212	0.0212	0.0212	0.0212	0.0212	0.0212	0.0212	0.0212
YGL010W		0.2927	0.2927	0.2927	0.2927			0.129	0.129	0.129	0.129	0.129	0.129	0.129	0.129	0.129	0.129	0.129	0.129		0.5339	0.5339	0.5339	0.5339	0.5339	0.5339	0.5339	0.5339	0.5339	0.5339	0.5339	0.5339	0.5339												-0.4737	-0.4737	-0.4737	-0.4737	-0.4737
YLR018C	POM34	0.0409	0.0409	0.0409	0.0409	0.0409	0.0409		0.1898	0.1898	0.1898	0.1898	0.1898	0.1898	0.1898	0.1898	0.1898	0.1898	0.1898	0.1898	0.1898	0.1898
YKL207W		0.0666	0.0666	0.0666	0.0666	0.0666	0.0666	0.0666	0.0666	0.0666	0.0666	-0.1006	-0.1424	-0.1424	-0.1424	-0.1424	-0.1424	-0.1424	-0.1424	-0.1424	-0.1424	-0.1424	-0.1748	-0.2072	-0.2072	-0.2072	-0.2072	-0.2072	-0.2072	-0.2072	-0.2072	-0.2072	-0.2072	-0.2072	-0.2072	-0.2072	-0.2072										-0.0504	-0.0504	-0.0504
YOR355W	GDS1
YER048W-A	ISD11																																																-0.0262
YFL010C	WWM1	1.0294	1.0294	1.0294	0.6052	0.4234	0.4234	0.4234	0.4234	0.4234	0.4234	0.4234	0.4234	0.4234	0.4234	0.4234	0.4234	0.4234							0.4719	0.4719	0.4719	0.4719	0.4719	0.4719	0.4719	0.4719	0.4719	0.4719	0.144	0.144	0.144	0.144	0.144	0.144	0.144	0.144	0.144	0.144	0.144	0.144	0.144
YGR063C	SPT4		-0.1858	-0.1858	-0.1858	-0.1858	-0.1858	-0.1858	-0.1858	-0.1858	-0.1858	-0.1858	-0.1858	-0.1858	-0.1858	-0.1858	-0.1858	-0.1858			0.0359	0.0359	0.0359	0.0359	0.0359	0.0359	0.0359	0.0359	0.0359	0.0359	0.0359	0.0359	0.0359	0.0359	0.0359
YGR129W	SYF2	0.8388	0.8388	0.8388	0.8388	0.8388	0.8388	0.8388						0.2824	0.2824	0.2824	0.2824	0.2824	0.2824	0.2824	0.2824	0.2824	0.2824	0.2824	0.2824	0.2824	0.2824	0.2824	0.2824
YDR513W	GRX2	0.1377	0.1377	0.1377	0.1377	0.1377	0.1377	0.1377	0.1377	0.1377	0.1377	0.1377	0.1377	0.1377	0.1377	0.1377	0.1377	0.1377	0.1377	0.1377				-0.028	-0.028	-0.028	-0.028	-0.028	-0.028	-0.028	-0.028	-0.028	-0.028	-0.028	-0.028	-0.028	-0.028	-0.028	-0.028	-0.028									-0.2342
YDR451C	YHP1	0.2884	0.2884	0.2884	0.2884																																							-0.4212	-0.4212	-0.4212	-0.4212	-0.4212	-0.4212
YHR138C		-0.1518	-0.1518	-0.1518	-0.1518	-0.1518	-0.1518	-0.1518	-0.1518	-0.1518	-0.1518						-0.705	-0.705	-0.705	-0.705	-0.705	-0.705	-0.705	-0.705	-0.705	-0.705	-0.705	-0.705	-0.705	-0.705	-0.705																		-0.2255
YOR005C	DNL4	-0.1736	-0.1736	-0.1736	-0.1736	-0.1736	-0.1736	0.3106	0.3106	0.3106	0.3106	0.3106	0.3106	0.3106	0.3106	0.3106	0.3106	0.3106					-0.3997	-0.3997	-0.3997	-0.3997	-0.3997	-0.3997	-0.3997	-0.3997	-0.3997	-0.3997	-0.3997
YPR094W	RDS3	-0.3033	-0.3033	-0.3033	-0.3033	-0.3033	-0.3033	-0.3033	-0.3033	-0.3033		-0.0159	-0.0159	-0.0159	-0.0159	-0.0159	-0.0159	-0.0159	-0.0159	-0.0159	-0.0159	-0.0159	-0.0159	-0.0159	-0.0159	-0.0901	-0.2014	-0.2014	-0.2014	-0.2014	-0.2014	-0.2014	-0.2014	-0.2014	-0.2014	-0.2014	-0.2014	-0.2014	-0.2014	-0.2014	-0.2014	-0.2014						-0.0033	-0.0033
YDL134C	PPH21																													-0.5358	-0.5358	-0.5358	-0.5358	-0.5358	-0.5358	-0.5358	-0.5358	-0.5358	-0.5358	-0.5358	-0.5358	-0.5358	-0.5358
YOR316C	COT1	-1.1489	-1.1489	-1.1489	-1.1489	-1.1489	-1.1489	-1.1489	-1.1489	-1.1489	-1.1489	-1.1489	-1.1489	-1.1489	-0.6436	-0.6436	-0.6436	-0.6436	-0.6436	-0.6436	-0.6436	-0.6436	-0.6436	-0.6436	-0.6436	-0.6436	-0.6436	-0.6436	-0.6436	-0.6436	-0.6436															-0.9067	-0.9067	-0.9067	-0.9067
YDL004W	ATP16											-0.4119	-0.4119	-0.4119	-0.4119	-0.4119	-0.4119	-0.4119	-0.4119	-0.4119	-0.4119	-0.4119																										-0.5947	-0.5947
YGR062C	COX18		-0.2907	-0.2907	-0.2907	-0.2907	-0.2907	-0.2907	-0.2907	-0.2907	-0.2907	-0.2907	-0.2907	-0.2907	-0.2907	-0.2907	-0.2907	-0.2907	-0.1115	0.008	0.008	0.008	0.008	0.008	0.008	0.008	0.008	0.008	-0.0367	-0.0367	-0.0367	-0.0367	-0.0367	-0.0367	-0.0367	-0.0367	-0.0367	-0.0367	-0.0367	-0.0367	-0.0367						0.6079	0.6079	0.6079
YJL163C		-0.3549	-0.3549	-0.3549	-0.3549	-0.3549	-0.3549	-0.3549	-0.3549	-0.3549	-0.3549	-0.3549	-0.3549	-0.3549															0.3457	0.3457	0.3457	0.3457	0.3457	0.3457	0.3457	0.3457	0.3457	0.3457	0.3457	0.3457
YKL051W	SFK1	-0.0071	-0.0071	-0.0071	-0.0071	-0.0071	-0.0071	-0.0071	-0.0517	-0.2301	-0.2301	-0.2301	-0.2301	-0.2301	-0.2301	-0.2301	-0.2301	-0.2301	-0.2301	-0.2301	-0.2301	-0.2301	-0.2301	-0.2301	-0.2301	-0.2301	-0.2301													-0.3675	-0.3675	-0.3675	-0.3675	-0.3675	-0.3675	-0.3675	-0.3675	-0.3675	-0.3675
YCR082W	AHC2	-1.0204	-1.2636	-1.2636	-1.2636	-1.2636	-1.2636	-1.2636	-1.2636	-1.2636	-1.2636	-1.2636	-1.2636	-1.2636	-1.2636	-1.2636	-1.2636	-1.2636			-0.5115	-0.5115	-0.5115	-0.5115	-0.5115	-0.5115	-0.5115	-0.5115	-0.5115	-0.5115	-0.5115	-0.5115	-0.5115													-0.2492	-0.2492	-0.2492	-0.2492
YLR216C	CPR6	-0.1238	-0.1238	-0.1238	0.0304	0.1845	0.1845	0.1845	0.1845	0.1845	0.1845	0.1845	0.1845	0.1845	0.1845	0.1845	0.1845	0.1845	0.1845	0.1845	0.1845			0.0636	0.0636	0.0636	0.0636	0.0636	0.0636	0.0636	0.0636	0.0636	0.0636	0.4734	0.6783	0.6783	0.6783	0.6783	0.6783	0.6783	0.6783	0.6783	0.6783	0.6783	0.6783				-0.1962
YMR256C	COX7	-1.129	-1.129	-1.129	-1.129	-1.129	-1.129	-1.129	-1.129	-1.129	-1.129	-1.129	-1.129	-1.129	-1.129										-1.1182	-1.1182	-1.1182	-1.1182	-1.1182	-1.1182	-1.1182	-1.1182	-1.1182	-1.1182	-1.1182	-1.1182	-0.8577	-0.8577	-0.8577	-0.8577	-0.8577	-0.8577	-0.8577	-0.8577	-0.8577	-0.8577	-0.8577	-0.8577
YFL024C	EPL1	-0.0471	-0.0471	-0.0471	-0.0471	-0.0471	-0.0471	-0.0471	-0.0471	-0.0471	-0.0471	-0.0471	-0.0471	-0.0471	-0.0471	-0.0471	-0.0471	-0.0471	-0.0471	-0.2208	-0.2208	-0.2208	-0.2208	-0.2208	-0.2208	-0.2208	-0.2208	-0.2208	-0.2208	-0.2208	-0.2208	-0.2208	-0.2208
YGR222W	PET54			-0.3549	-0.3549	-0.3549	-0.3549	-0.3549	-0.3549	-0.3549	-0.3549	-0.3549	-0.3549	-0.3549	-0.3549	-0.3549	-0.3549	-0.3549	-0.4357	-0.6243	-0.6243	-0.6243	-0.6243	-0.6243	-0.6243	-0.6243	-0.6243	-0.6243	-0.6243														-0.7653	-0.7653	-0.7653	-0.7653	-0.7653	-0.7653	-0.7653
YER088C	DOT6	-0.5143	-0.5143
YLR218C		0.4907	0.4907	0.4907	0.4907	0.4907	0.4907	0.4907	0.4907	0.4907	0.4907	0.4907	0.4907	0.4907	0.4907	0.4907	0.4907	0.4907	0.4907				-0.297	-0.297	-0.297	-0.297	-0.297	-0.297	-0.297	-0.297	-0.297	-0.297	-0.297	-0.297	-0.297	-0.297	-0.297	-0.297	-0.297	-0.297									-0.1238
YER033C	ZRG8	-0.7036	-0.7036	-0.7036	-0.7036	-0.7036	-0.7036	-0.7036				-0.4327	-0.4327	-0.4327	-0.4327	-0.4327	-0.4327	-0.4327	-0.4327	-0.4327	-0.4327	-0.4327	-0.4327																								-0.7956	-0.7956	-0.7956
YPL252C	YAH1	-1.2182	-1.2182	-1.2182	-1.2182	-1.2182	-1.2182	-1.2182	-1.2182	-1.2182	-1.2182	-1.2182	-1.2182			-0.9655	-0.9655	-0.9655	-0.9655	-0.9655	-0.9655	-0.9655	-0.9655	-0.9655	-0.9655	-0.9655
YDL061C	RPS29B	0.9941	0.9941	0.9941	0.9941	0.9941	0.9941	0.9941	0.5078	0.4384	0.4384	0.4384	0.4384	0.4384	0.4384	0.4384	0.4384	0.4384	0.4384	0.4384	0.4384	0.4384	0.4384
YER020W	GPA2	-0.3217	-0.3217	-0.3217	-0.3217	-0.3217																	-1.0975	-1.0975	-1.0975	-1.0975	-1.0975	-1.0975	-1.0975	-1.0975	-1.0975	-1.0975	-1.0975	-1.0975	-1.0975	-1.0975	-1.0975	-1.0975	-1.0975	-1.0975					-0.5885	-0.5885	-0.5885	-0.5885	-0.5885
YBL041W	PRE7																																										-1.6627	-1.6627	-1.6627	-1.6627	-1.6627	-1.6627	-1.6627
YOL001W	PHO80							-0.6194	-0.6194	-0.6194	-0.6194	-0.6194	-0.6194	-0.6194	-0.6194	-0.6194	-0.6194	-0.6194	-0.6194	-0.6194	-0.6194	-0.6194	-0.5598	-0.3217	-0.3217	-0.3217	-0.3217	-0.3217	-0.3217	-0.3217	-0.3217	-0.3217	-0.3217	-0.3217	-0.4066	-0.4066	-0.4066	-0.4066	-0.4066	-0.4066	-0.4066	-0.4066	-0.4066	-0.4066		-0.1182	-0.1182	-0.1182	-0.1182
YER170W	ADK2	-0.6535	-0.6535	-0.6535	-0.6535	-0.6535	-0.6535	-0.6535	-0.6535				-0.3818	-0.3818	-0.3818	-0.3818	-0.3818	-0.3818	-0.3818	-0.3818	-0.3818	-0.3818	-0.3818							-0.7938	-0.7938	-0.7938	-0.7938	-0.7938	-0.7938	-0.7938	-0.7938	-0.7938	-0.7938	-0.7938	-0.7938	-0.7938	-0.7938	-0.7938	-0.7938	-0.7938
YPL220W	RPL1A	-0.7964	-0.8883	-0.8883	-0.8883	-0.8883	-0.8883	-0.8883	-0.8883	-0.8883	-0.8883	-0.8883	-0.8883	-0.8883	-0.8883	-0.8883	-0.8883
YGL166W	CUP2	0.5673	0.5673	0.5673	0.5673	0.5673	0.5673	0.5673	0.5673	0.5673	0.5673	0.5673									0.3212	0.3212	0.3212	0.3212	0.3212	0.3212	0.3212	0.3212	0.3212	0.3212	0.3212	0.3212	0.3212	0.3212	-0.0993	-0.0993	-0.0993	-0.0993	-0.0993	-0.0993	-0.0993	-0.0993	-0.0993	-0.0993	-0.0993	-0.0993		-0.6293	-0.6293
YHL024W	RIM4	-0.9203	-0.9203	-0.9203	-0.9203	-0.9203	-0.9203	-0.9203	-0.9203	-0.9203																							-0.8792	-0.8792	-0.8792	-0.8792	-0.8792	-0.8792	-0.8792	-0.8792	-0.8792	-0.8792	-0.8792	-0.8792	-0.8792	-0.8792	-0.8792	-0.8792	-0.8792
YDR107C	TMN2	0.2824	0.2824	0.2824	0.2824	0.3786	0.4748	0.4748	0.4748	0.4748	0.4748	0.4748	0.4748	0.4748	0.4748	0.4748	0.4748	0.4748	0.4748	0.4748	0.4748					0.0409	0.0409	0.0409	0.0409	0.0409	0.0409	0.0409	0.0409	0.0409	0.0409	0.0409	0.0409	0.0409	0.0409
YKL156W	RPS27A	0.0473	-0.0738	-0.0738	-0.0738	-0.0738	-0.0738	-0.0738	-0.0738	-0.0738	-0.0738	-0.0738	-0.0738	-0.0738	-0.0738	-0.0738	-0.0738	-0.0738	-0.0738
YNL011C		-0.5896	-0.5896	-0.5896	-0.5896	-0.5896					-0.4074	-0.4074	-0.4074	-0.4074	-0.4074	-0.4074	-0.4074	-0.4074	-0.4074	-0.4074	-0.4074		-0.4058	-0.4058	-0.4058	-0.4058	-0.4058	-0.4058	-0.4058	-0.4058	-0.5184	-0.7811	-0.7811	-0.7811	-0.7811	-0.7811	-0.7811	-0.7811	-0.7811	-0.7811
YDR103W	STE5	0.1861	0.1861	0.1861	0.1861	0.1861	0.1861	-0.0856	-0.0856	-0.0856	-0.0856	-0.0856	-0.0856	-0.0856	-0.0856	-0.0856	-0.0856	-0.0856	-0.0856	-0.0856	-0.0856	-0.0856	-0.0856																					-0.8023	-0.8023	-0.8023	-0.8023	-0.8023	-0.8023
YEL071W	DLD3			0.6783	0.6783	0.6783	0.6783	0.6783	0.6783	0.6783	0.6783	0.6783	0.6783	0.6783					-0.051	-0.051	-0.051	-0.051	-0.051	-0.051	-0.051	-0.051	-0.051	-0.051	-0.051	-0.051	-0.051	-0.051	-0.051	0.4008	0.4008	0.4008	0.4008	0.4008	0.4008	0.4008	0.4008	0.4008	0.4008	0.4008	0.4008	-0.3464	-0.3464	-0.3464	-0.3464
YNL208W		-0.6018	-0.6018	-0.6018	-0.6018	-0.6018	-0.6018	-0.6018	-0.6018	-0.6018	-0.6018												-1.2062	-1.2062	-1.2062	-1.2062	-1.2062	-1.2062	-1.2062	-1.2062	-1.2062	-1.2062	-1.2062	-1.0136	-1.0136	-1.0136	-1.0136	-1.0136	-1.0136	-1.0136	-1.0136	-1.0136	-1.0136	-1.0136	-1.0136	-1.0136	-1.0136	-1.0136	-1.0136
YNL052W	COX5A	-0.0993	-0.0993	-0.0993	-0.0993	-0.0993	-0.0993	-0.0993	-0.0993	-0.0993	-0.0993	-0.0993	-0.0993	-0.0993	-0.0993	-0.0993	-0.0993	-0.0993				-0.6713	-0.6713	-0.6713	-0.6713	-0.6713	-0.6713	-0.6713	-0.6713	-0.6713	-0.6713	-0.6713	-0.6713		0.8158	0.8158	0.8158	0.8158	0.8158	0.8158	0.8158	0.8158	0.8158	0.8158	0.8158	-0.4299	-0.4299	-0.4299	-0.4299
YLR036C		-0.2885	-0.2885	-0.2885	-0.2885									-0.3957	-0.3957	-0.3957	-0.3957	-0.3957	-0.3957	-0.3957	-0.3957	-0.3957	-0.3957	-0.3957	-0.3957						-0.1842	-0.1842	-0.1842	-0.1842	-0.1842	-0.1842	-0.1842	-0.1842	-0.1842	-0.1842	-0.1842	-0.1842
YIL119C	RPI1
YOR176W	HEM15	-0.0114	-0.0114	-0.0114	-0.0114	-0.0114	-0.0114	-0.0114	-0.0114	-0.0114	-0.0114	-0.0114	-0.0114	-0.1102	-0.1102	-0.1102	-0.1102	-0.1102	-0.1102	-0.1102	-0.1102	-0.1102	-0.1102	-0.1102	-0.1102	-0.1102	-0.1102	-0.1102	-0.1102	-0.1102	-0.1102	-0.1102							-0.1421	-0.1421	-0.1421	-0.1421	-0.1421	-0.1421	-0.1421	-0.1421	-0.1421	-0.1421	-0.1421
YPR066W	UBA3	0.1231	0.1231	0.1231	0.1544	0.2798	0.2798	0.2798	0.2798	0.2798	0.2798	0.2798	0.2798	0.2798	0.2798	0.2798	0.2798
YBR092C	PHO3																																											-0.866	-0.866	-0.866	-0.866	-0.866	-0.866
YPL076W	GPI2	-0.4788	-0.4788	-0.4788	-0.2576	-0.1102	-0.1102	-0.1102	-0.1102	-0.1102	-0.1102	-0.1102	-0.1102	-0.1102	-0.1102	-0.1102	-0.1102		0.3727	0.3727	0.3727	0.3727	0.3727	0.3727	0.3727	0.3727	0.3727	0.3727	0.3727	0.3727	0.3727	0.3727	0.3727	0.3727	0.3727	0.3727	0.3727
YPR034W	ARP7	0.3637				0.0457	0.0457	0.0457	0.0457	0.0457	0.0457	0.0457	0.0457	0.0457	0.0457	-0.1781	-0.29	-0.29	-0.29	-0.29	-0.29	-0.29	-0.29	-0.29	-0.29													-0.5947	-0.5947	-0.5947	-0.5947	-0.5947	-0.5947	-0.5947	-0.5947	-0.5947	-0.5947	-0.5947	-0.5947
YJL035C	TAD2	0.4283				-0.0738	-0.0738	-0.0738	-0.0738	-0.0738	-0.0738	-0.0738	-0.0738	-0.0738	-0.0738	-0.0738	-0.1388	-0.1388	-0.1388	-0.1388	-0.1388	-0.1388	-0.1388	-0.1388	-0.1388	-0.1388	-0.1388	-0.1388	-0.1388	-0.1388	-0.1388	-0.1388	-0.1388	-0.1388				-0.1518	-0.1518	-0.1518	-0.1518	-0.1518	-0.1518	-0.1518	-0.1518	-0.1518	-0.1518	-0.1076	-0.0929
YLL043W	FPS1	-0.2392	-0.2392	-0.2392	-0.2392	-0.2392	-0.2392	-0.2392	-0.2068	0.0855	0.0855	0.0855	0.0855	0.0855	0.0855	0.0855	0.0855	0.0855	0.0855	0.0855	0.0855		-0.8936	-0.8936	-0.8936	-0.8936	-0.8936	-0.8936	-0.8936	-0.8936	-0.8936	-0.8936	-0.8936	-0.8936	-0.8936	-0.8936	-0.8936	-0.8936		-0.5847	-0.5847	-0.5847	-0.5847	-0.5847	-0.5847	-0.5847	-0.5847	-0.5847	-0.5847
YLR055C	SPT8
YHR001W-A	QCR10	-0.2423	-0.2423	-0.2423	-0.2423	-0.2423	-0.2423	-0.2423	-0.2423	-0.2423	-0.2423							-0.5821	-0.5821	-0.5821	-0.5821	-0.5821	-0.5821	-0.5821	-0.5821	-0.5821	-0.5821	-0.5821	-0.5821	-0.5821	-0.5821																		-0.8911
YLR134W	PDC5	0.1842	0.1842	0.1842	0.1842	0.1842	0.1842	0.1842	0.1842	0.1842	0.1842	0.1842	0.1842								0.0666	0.0666	0.0666	0.0666	0.0666	0.0666	0.0666	0.0666	0.0666	0.0666	-0.0156	-0.0156	-0.0156	-0.0156	-0.0156	-0.0156	-0.0156	-0.0156	-0.0156	-0.0156	-0.0156	-0.0156
YER155C	BEM2					-1.0289	-1.0289	-1.0289	-1.0289	-1.0289	-1.0289	-1.0289	-1.0289	-1.0289	-1.0289	-1.0289	-1.0289	-1.3492	-1.3492	-1.3492	-1.3492	-1.3492	-1.3492	-1.3492	-1.3492	-1.3492	-1.3492	-1.3492	-1.3492	-1.3492	-1.3492	-1.3492	-1.3492	-1.3492	-1.3492							-0.9998	-0.9998	-0.9998	-0.9998	-0.9998	-0.9998	-0.9998	-0.9998
YPR023C	EAF3	0.2044	0.2044	0.2044	0.2044	0.2044	0.2044	0.2044	0.2044	0.2044	0.2044	0.2044	0.2044	0.2044		0.3192	0.3192	0.3192	0.3192	0.3192	0.3192	0.3192	0.3192	0.3192	0.3192	0.3192	0.3192	0.3192	0.3192	0.3192	0.3192	0.3192	0.3192	0.3192				0.216	0.216	0.216	0.216	0.216	0.216	0.216	0.216	0.216	0.216	0.216	0.216
YIR032C	DAL3	0.3429	0.3429	0.3429	0.3429	0.3429	0.3429	0.3429	0.3429	0.3429	0.3598	0.3598	0.3598	0.3598	0.3598	0.3598	0.3598	0.3598	0.3598	0.3598	0.3598	0.3598	0.3598	0.3598	0.3598	0.3598	0.3598	0.3598	0.3598
YLR237W	THI7	-0.9485	-0.9485	-0.9485	-0.9485																-0.8213	-0.8213	-0.8213	-0.8213	-0.8213	-0.8213	-0.8213	-0.8213	-0.8213	-0.8213	-0.8213	-0.8213	-0.8213	-0.8213	-0.8213	-0.8213	-0.8213												-1.3217
YDL078C	MDH3				-1.1041	-1.1041	-1.1041	-1.1041	-1.1041	-1.1041	-1.1041	-1.1041	-1.1041	-1.1041	-1.1041	-1.1041	-1.1041	-1.1041	-1.1041	-1.1041	-1.1041	-1.1041	-0.5452	-0.3217	-0.3217	-0.3217	-0.3217	-0.3217	-0.3217	-0.3217	-0.3217	-0.3217	-0.3217	-0.3217	-0.3217	-0.3217	-0.3217	-0.3217	-0.3217	-0.3217	-0.3217							-0.5679	-0.5679
YMR176W	ECM5	-0.4651	-0.4651	-0.4651	-0.4651	-0.4651	-0.4651	-0.4651	-0.4651	-0.4651	-0.4651	-0.4651	-0.4651																		-0.8445	-0.8445	-0.8445	-0.8445	-0.8445	-0.8445	-0.8445	-0.8445	-0.8445	-0.8445	-0.8445	-0.8445	-0.8445	-0.8445	-0.8445		-0.1602	-0.1602	-0.1602
YKL006W	RPL14A
YNL038W	GPI15	0.4208	0.4208	0.4208	0.4208	0.4208		0.0804	0.0804	0.0804	0.0804	0.0804	0.0804	0.0804	0.0804	0.0804	0.0804	0.0804	0.0804	0.0804	-0.0322	-0.0322	-0.0322	-0.0322	-0.0322	-0.0322	-0.0322	-0.0322	-0.0322	-0.0322	-0.0322
YNL268W	LYP1	0.044	0.044								-0.6955	-0.6955	-0.6955	-0.6955	-0.6955	-0.6955	-0.6955	-0.6955	-0.6955	-0.6955	-0.6955	-0.6955	-0.6955	-0.6955	-0.6955	-0.6955																							-0.8363
YBR105C	VID24	-0.6147	-0.6147	-0.6147
YNR045W	PET494	-0.748	-0.748	-0.748	-0.748	-0.748	-0.748										-0.1939	-0.1939	-0.1939	-0.1939	-0.1939	-0.1939	-0.1939	-0.1939	-0.1939	-0.1939	-0.1939	-0.1939	-0.1939																			-0.4212	-0.4212
YMR246W	FAA4	-0.9632	-0.9632	-0.9632						-1.5163	-1.5163	-1.5163	-1.5163	-1.5163	-1.5163	-1.5163	-1.5163	-1.5163	-1.5163	-1.5163	-1.5163	-1.5163							-0.6656	-0.6656	-0.6656	-0.6656	-0.6656	-0.6656	-0.6656	-0.6656	-0.6656	-0.6656	-0.9231	-0.9231	-0.9231	-0.9231	-0.9231	-0.9231	-0.9231	-0.9231	-0.9231	-0.9231	-0.9231
YCL004W	PGS1	-0.1573	-0.1573	-0.1573	-0.1573	-0.1573	-0.1573	-0.1573	-0.1573	-0.2749	-0.2749	-0.2749	-0.2749	-0.2749	-0.2749	-0.2749	-0.2749	-0.2749	-0.2749	-0.2749	-0.2749	-0.2749	-0.2749	-0.2749	-0.2749	-1.1093	-1.6656	-1.6656	-1.6656	-1.6656	-1.6656	-1.6656	-1.6656	-1.6656	-1.6656	-1.6656	-1.6656	-1.6656	-1.6656									-0.5902	-0.5902
YBR196C	PGI1	-1.0587
YPL227C	ALG5	-0.1594	-0.1594	-0.1594	-0.1594	-0.1594	-0.1594	-0.1594	0.2329	0.2329	0.2329	0.2329	0.2329	0.2329	0.2329	0.2329	0.2329	0.2329	0.2329	0.2329	0.2329	0.2329	0.2329
YCR020W-B	HTL1	0.2633	0.2633	0.2633	0.0456	-0.2264	-0.2264	-0.2264	-0.2264	-0.2264	-0.2264	-0.2264	-0.2264	-0.2264	-0.2264	-0.2264	-0.2264	-0.2264	-0.2264	-0.2264	-0.2264	0.0029	0.0602	0.0602	0.0602	0.0602	0.0602	0.0602	0.0602	0.0602	0.0602	0.0602	0.0602	0.0602	0.0602	0.0602	0.0602	0.0602	0.0602
YLR267W	BOP2	-0.6812		-0.4986	-0.4986	-0.4986	-0.4986	-0.4986	-0.4986	-0.4986	-0.4986	-0.4986	-0.4986	-0.4986	-0.4986	-0.4986	-0.4986	-0.8441	-0.8441	-0.8441	-0.8441	-0.8441	-0.8441	-0.8441	-0.8441	-0.8441	-0.8441	-0.8441	-0.8441	-0.8441	-0.8441	-0.8441	-0.8441	-1.1114	-1.1411	-1.1411	-1.1411	-1.1411	-1.1411	-1.1411	-1.1411	-1.1411	-1.1411	-1.1411	-1.1411	-1.1411	-0.6436	-0.6436	-0.6436
YMR070W	MOT3
YIL009W	FAA3					-0.8719	-0.8719	-0.8719	-0.8719	-0.8719	-0.8719	-0.8719	-0.8719	-0.8719	-0.8719	-0.8719	-0.8719	-0.8719	-0.8719	-0.8719	-0.8719	-0.8719	-0.0587	-0.0587	-0.0587	-0.0587	-0.0587	-0.0587	-0.0587	-0.0587	-0.0587	-0.0587															-0.7449	-0.7449	-0.7449
YDL085W	NDE2	-0.6696	-0.6696	-0.6696	-0.6696	-0.6696	-0.6696	-0.6696	-0.6696	-0.6696	-0.6696	-0.6696	-0.6696	-0.5281	-0.5281	-0.5281	-0.5281	-0.5281	-0.5281	-0.5281	-0.5281	-0.5281	-0.5281	-0.4403	-0.4403	-0.4403	-0.4403	-0.4403	-0.4403	-0.4403	-0.4403	-0.4403	-0.4403	-0.4403	-0.4403	-0.4403	-0.4403	-0.4403	-0.4403	-0.4403	-0.4403								-0.4058
YBR119W	MUD1
YIL137C	TMA108	-0.3576	-0.3576	-0.2921	-0.1392	-0.1392	-0.1392	-0.1392	-0.1392	-0.1392	-0.1392	-0.1392	-0.1392	-0.1392	-0.1392	-0.1392	-0.1392	-0.1392	-0.1392	-0.1392	-0.1392	-0.1392		-0.6843	-0.6843	-0.6843	-0.6843	-0.6843	-0.6843	-0.6843	-0.6843	-0.6843	-0.6843	-0.6843	-0.6843	-0.6843	-0.6843	-0.6843											-0.7261
YLR034C	SMF3	-0.8363	-0.8363	-0.8363	-0.8363	-0.8363	-0.8363	-0.8363	-0.8363	-0.8363	-0.8363	-0.8363	-0.8363	-0.8363	-0.8363	-0.8363	-0.8363	-0.5281	-0.5281	-0.5281	-0.5281	-0.5281	-0.5281	-0.5281	-0.5281	-0.5281	-0.5281	-0.5281	-0.5281	-0.5281	-0.5281	-0.5281		-0.4179	-0.4179	-0.4179	-0.4179	-0.4179	-0.4179	-0.4179	-0.4179	-0.4179	-0.4179	-0.4179
YOL009C	MDM12	-0.3732	-0.3732	-0.3732	-0.3732	-0.3732	-0.3732		-0.0532	-0.0532	-0.0532	-0.0532	-0.0532	-0.0532	-0.0532	-0.0532	-0.0532	-0.0532	-0.0532	-0.0532	-0.0532	-0.0532	-0.0532	-0.0532	-0.0532	-0.0532			0.1113	0.1113	0.1113	0.1113	0.1113	0.1113	0.1113	0.1113	0.1113	0.1113	0.1113	0.1113	0.1113	0.1113	0.1113	0.1113					-0.4042
YKL001C	MET14												-0.7056	-0.7056	-0.7056	-0.7056	-0.7056	-0.7056	-0.7056	-0.7056	-0.7056	-0.7056	-0.7056	-0.7056	-0.7056	-0.7056	-0.7056	-0.7056	-0.7056
YOL093W	TRM10		0.2449	0.2449	0.2449	0.2449	0.2449	0.2449	0.2449	0.2449	0.2449	0.2449	0.2449	0.2449	0.2449	0.2449	0.2449	0.2449	0.2449	0.2449	0.2449	-0.0766	-0.0766	-0.0766	-0.0766	-0.0766	-0.0766	-0.0766	-0.0766	-0.0766	-0.0766	-0.0766	-0.0766																-0.4942
YKR060W	UTP30																														-0.2513	-0.2513	-0.2513	-0.2513	-0.2513	-0.2513	-0.2513	-0.2513	-0.2513	-0.2513	-0.2513	-0.2513	-0.2513						-0.3573
YER132C	PMD1																														0.0933	0.0933	0.0933	0.0933	0.0933	0.0933	0.0933	0.0933	0.0933	0.0933	0.0933	0.0933	0.0933	0.0933	0.0933	0.0933	0.0933	-1.5811	-1.5811
YLR262C-A	TMA7	-0.2603	-0.2603	-0.2603	-0.2603	-0.2603		0.9007	0.9007	0.9007	0.9007	0.9007	0.9007	0.9007	0.9007	0.9007	0.9007	0.9007	0.9007										0.3618	0.3618	0.3618	0.3618	0.3618	0.3618	0.3618	0.3618	0.3618	0.3618	0.3618	0.3618	0.3618						-0.6171	-0.6171	-0.6171
YPR011C		-0.2852												-0.8192	-0.8192	-0.8192	-0.8192	-0.8192	-0.8192	-0.8192	-0.8192	-0.8192	-0.8192	-0.8192	-0.8192	-0.8192					-0.3217	-0.3217	-0.3217	-0.3217	-0.3217	-0.3217	-0.3217	-0.3217	-0.3217	-0.3217	-0.3217	-0.3217	-0.3217	-0.3217
YGR169C	PUS6	-0.089	-0.089	-0.089															-0.0993	-0.0993	-0.0993	-0.0993	-0.0993	-0.0993	-0.0993	-0.0993	-0.0993	-0.0993	-0.0993	-0.0993	-0.0993	-0.0993	-0.0993	-0.0993	-0.0993	-0.0993													-0.4737
YLR268W	SEC22	0.5196	0.5196	0.5196	0.5196	0.5196	0.5196	0.3507	-0.0434	-0.0434	-0.0434	-0.0434	-0.0434	-0.0434	-0.0434	-0.0434	-0.0434	-0.0434	-0.0434	-0.0781	-0.1823	-0.1823	-0.1823	-0.1823	-0.1823	-0.1823	-0.1823	-0.1823	-0.1823	-0.1823	-0.1823	-0.1823	-0.1823
YJR112W	NNF1	0.3888	0.3888	0.3888	0.3888	0.3888	0.3888	0.3888	0.3888	0.3888	0.3888	0.3888			0.025	0.025	0.025	0.025	0.025	0.025	0.025	0.025	0.025	0.025	0.025	0.025	0.025	0.025	0.025	0.025					0.2477	0.2477	0.2477	0.2477	0.2477	0.2477	0.2477	0.2477	0.2477	0.2477	0.2477	0.2477
YDL092W	SRP14	-0.7269	-0.7269	-0.7269	-0.7269	-0.7269	-0.7269	-0.7269	-0.7269	-0.7269	-0.7269					-0.1173	-0.1173	-0.1173	-0.1173	-0.1173	-0.1173	-0.1173	-0.1173	-0.1173	-0.1173	-0.1173	-0.1173	-0.1173	-0.1173	-0.1173	-0.1173	-0.1173	-0.1173	-0.1173															-0.3217
YNL254C	RTC4	-0.716	-0.716	-0.716	-0.716	-0.716				-0.6112	-0.6112	-0.6112	-0.6112	-0.6112	-0.6112	-0.6112	-0.6112	-0.6112	-0.6112	-0.6112	-0.6112	-0.6112	-0.593	-0.593	-0.593	-0.593	-0.593	-0.593	-0.593	-0.593	-0.593	-0.593		-0.5061	-0.5061	-0.5061	-0.5061	-0.5061	-0.5061	-0.5061	-0.5061	-0.5061	-0.5061	-0.5061	-0.5061		-0.3602	-0.3602	-0.3602
YIR030C	DCG1	-0.0456	-0.0456	-0.0456	-0.0456	-0.0456	-0.0456	-0.0456	-0.0456	-0.0456	-0.0456			-0.2832	-0.2832	-0.2832	-0.2832	-0.2832	-0.2832	-0.2832	-0.2832	-0.2832	-0.2832	-0.2832	-0.2832	-0.2832						-0.0885	-0.0885	-0.0885	-0.0885	-0.0885	-0.0885	-0.0885	-0.0885	-0.0885	-0.0885	-0.0885	-0.0885	-0.0885	-0.0885	-0.0885
YEL003W	GIM4					-0.1087	-0.1087	-0.1087	-0.1087	-0.1087	-0.1087	-0.1087	-0.1087	-0.1087	-0.1087	-0.1087	-0.1087	-0.1087	-0.1087	-0.1087						-0.7751	-0.7751	-0.7751	-0.7751	-0.7751	-0.7751	-0.7751	-0.7751	-0.7751	-0.7751	-0.7751	-0.7751	-0.7751	-0.7751	-0.7751
YOR305W		-0.129	-0.129	-0.129	-0.129	-0.2692	-0.2692	-0.2692	-0.2692	-0.2692	-0.2692	-0.2692	-0.2692	-0.2692	-0.2692	-0.2692	-0.2692	-0.2692	-0.2692						-0.0993	-0.0993	-0.0993	-0.0993	-0.0993	-0.0993	-0.0993	-0.0993	-0.0993	-0.0993	-0.0993	-0.0993
YDL012C		0.1977	0.1977	0.1977	0.1977	0.1977	0.1977	0.1977	0.1977	0.1977	0.1977	0.2798	0.2798	0.2798	0.2798	0.2798	0.2798	0.2798	0.2798	0.2798	0.2798															0.4977	0.4977	0.4977	0.4977	0.4977	0.4977	0.4977	0.4977	0.4977	0.4977	0.4977
YIL138C	TPM2	-0.1962	-0.1962	-0.1962	-0.7933	-0.7933	-0.7933	-0.7933	-0.7933	-0.7933	-0.7933	-0.7933	-0.7933	-0.7933	-0.7933	-0.7933	-0.7933	-0.7933	-0.7933			-0.4916	-0.4916	-0.4916	-0.4916	-0.4916	-0.4916	-0.4916	-0.4916	-0.4916	-0.4916	-0.4916	-0.4916	-0.4916	-0.4916	-0.4916	-0.4916
YGR082W	TOM20		0.3819	0.3819	0.3819	0.3819	0.3819	0.3819	0.3819	0.3819	0.3819	0.3819	0.3819	0.3819	0.3819	0.3819	0.3819	0.2572	0.2038	0.2038	0.2038	0.2038	0.2038	0.2038	0.2038	0.2038	0.2038	0.2038	0.2038	0.2038																		-0.4115	-0.4115
YOR150W	MRPL23				-0.121	-0.121	-0.121	-0.121	-0.121	-0.121	-0.121	-0.121	-0.121	-0.121	-0.121												-0.2222	-0.2222	-0.2222	-0.2222	-0.2222	-0.2222	-0.2222	-0.2222	-0.2222	-0.2222	-0.2222
YDR508C	GNP1
YIL033C	BCY1	-0.253	-0.253																			-0.5385	-0.5385	-0.5385	-0.5385	-0.5385	-0.5385	-0.5385	-0.5385	-0.5385	-0.5385	-0.5385	-0.7623	-0.7623	-0.7623	-0.7623	-0.7623	-0.7623	-0.7623	-0.7623	-0.7623	-0.7623	-0.7623	-0.7623	-0.7623	-0.7623	-0.7623	-0.7623	-0.7623
YDR328C	SKP1	-0.2286	-0.2286	-0.2286	-0.2286	-0.2286	-0.2286	-0.2286	-0.2286	-0.5785	-0.5785	-0.5785	-0.5785	-0.5785	-0.5785	-0.5785	-0.5785	-0.5785	-0.5785	-0.5785	-0.5785		-0.4049	-0.4049	-0.4049	-0.4049	-0.4049	-0.4049	-0.4049	-0.4049	-0.4049	-0.4049	-0.4049	-0.4049	-0.4049	-0.4049	-0.4049												-0.4092
YMR230W	RPS10B	-0.1231	-0.1231	-0.1231	-0.1231											-1.3997	-1.3997	-1.3997	-1.3997	-1.3997	-1.3997	-1.3997	-1.3997	-1.3997	-1.3997	-1.3997
YDR450W	RPS18A	-0.1373	-0.1373	-0.1373	-0.1373
YML107C	PML39				-0.1152	-0.1152	-0.1152	-0.1152	-0.1152	-0.1152	-0.1152	-0.1152	-0.1152	-0.1152	-0.1152	-0.1152			-0.2576	-0.2576	-0.2576	-0.2576	-0.2576	-0.2576	-0.2576	-0.2576	-0.2576	-0.2576	-0.2576																			-0.3503	-0.3503
YIR038C	GTT1	0.0262	0.0262	0.0262	0.0262	0.0262	0.0262	0.0262	0.0262	0.0262	0.0262	0.0262	0.0262	0.0262						-0.0614	-0.0614	-0.0614	-0.0614	-0.0614	-0.0614	-0.0614	-0.0614	-0.0614	-0.0614	-0.0614	-0.0614	-0.0614	-0.0614	-0.0614	-0.0614	0.4649	0.4649	0.4649	0.4649	0.4649	0.4649	0.4649	0.4649	0.4649	0.4649	0.4649			0.0748
YOL129W	VPS68					-0.3868	-0.3868	-0.3868	-0.3868	-0.3868	-0.3868	-0.3868	-0.3868	-0.3868	-0.3868	-0.3868	-0.3868	-0.3868																															-0.6349
YCR071C	IMG2	-0.2818	-0.2818	-0.2818	-0.2818	-0.2818	-0.2818	-0.2818	-0.2818	-0.2818	-0.2818	-0.2818	-0.2818	-0.2818	-0.2818	-0.2818	-0.2818	-0.2818	-0.2988	-0.3413	-0.3413	-0.3413	-0.3413	-0.3413	-0.3413	-0.3413	-0.3413	-0.3413	-0.3413	-0.3413	-0.3413	-0.3413	-0.3413														0.0324	0.0324	0.0324
YLL045C	RPL8B	-0.2193	-0.2193	-0.2193	-0.2193	-0.2193	-0.2193	-0.2193	-0.2193	-0.2193	-0.2193	-0.1548	-0.1477	-0.1477	-0.1477	-0.1477	-0.1477	-0.1477	-0.1477	-0.1477	-0.1477	-0.1477	-0.1477	-0.1477	-0.1477
YDL212W	SHR3	-0.4175	-0.5947	-0.5947	-0.5947	-0.5947	-0.5947	-0.5947	-0.5947	-0.5947	-0.5947	-0.5947	-0.5947	-0.5947	-0.5947	-0.5947							-0.8478	-0.8478	-0.8478	-0.8478	-0.8478	-0.8478	-0.8478	-0.8478	-0.8478	-0.8478	-0.8478	-0.8478	-0.8478	-0.8478	-0.8478	-0.8478									-0.4968	-0.4968	-0.4968
YLR328W	NMA1	-0.5696	-0.5696	-0.5696	-0.5696	-0.5696	-0.5696	-0.5696	-0.5696	-0.5696	-0.5696	-0.5696																						0.1929	0.1929	0.1929	0.1929	0.1929	0.1929	0.1929	0.1929	0.1929	0.1929	0.1929			-0.9067	-0.9067	-0.9067
YNR010W	CSE2					0.0186	0.0186	0.0186	0.0186	0.0186	0.0186	0.0186	0.0186	0.0186	0.0186	0.0186	0.0186	0.0186	0.0186	0.0186	0.0186	0.0186	0.0186	0.0186
YDL181W	INH1	-0.2265	-0.2265	-0.2265	-0.2265	-0.2265	-0.2265	-0.2265	-0.2265	-0.2265	-0.2265	-0.5448	-1.0221	-1.0221	-1.0221	-1.0221	-1.0221	-1.0221	-1.0221	-1.0221	-1.0221	-1.0221	-1.0221	-1.0221	-1.0221	-1.0221	-1.0221																		-0.3682	-0.3682	-0.3682	-0.3682	-0.3682
YMR255W	GFD1								-0.4651	-0.4651	-0.4651	-0.4651	-0.4651	-0.4651	-0.4651	-0.4651	-0.4651	-0.4651	-0.4651	-0.4651			-0.3541	-0.3541	-0.3541	-0.3541	-0.3541	-0.3541	-0.3541	-0.3541	-0.3541	-0.3541	-0.3541	-0.3541	-0.3541	-0.3541	-0.3541	-0.3541	-0.3541	-0.3541								-0.264	-0.264
YEL005C	VAB2	-0.3888	-0.3888	-0.3888	-0.3888	-0.3888	-0.3888	-0.3888					0.3337	0.3337	0.3337	0.3337	0.3337	0.3337	0.3337	0.3337	0.3337	0.3337				0.0608	0.0608	0.0608	0.0608	0.0608	0.0608	0.0608	0.0608	0.0608	0.0608	0.0608	0.0608			0.0153	0.0153	0.0153	0.0153	0.0153	0.0153	0.0153	0.0153	0.0153	0.0153
YNR064C		-0.5561	-0.5795	-0.5795	-0.5795	-0.5795	-0.5795	-0.5795	-0.5795	-0.5795	-0.5795	-0.5795	-0.5795	-0.5795	-0.5795	-0.5795	-0.5795	-0.5795	-0.325	0.0568	0.0568	0.0568	0.0568	0.0568	0.0568	0.0568	0.0568	0.0568	0.0568	0.0568		0.1454	0.1454	0.1454	0.1454	0.1454	0.1454	0.1454	0.1454	0.1454	0.1454						-0.278	-0.278	-0.278
YMR296C	LCB1	0.0645	0.0645	0.0645	0.0645	0.0645	0.0645	0.0645	0.0645	0.0645	0.0645	0.0645	0.0645	0.0645	0.0645
YCL033C		0.1489	0.1489	0.1489	0.1489	0.1489	0.1489	0.1489		0.2878	0.2878	0.2878	0.2878	0.2878	0.2878	0.2878	0.2878	0.2878	0.2878	0.2878	0.2878	0.2878	0.2878	0.2878	0.2878			0.5336	0.5336	0.5336	0.5336	0.5336	0.5336	0.5336	0.5336	0.5336	0.5336	0.5336	0.5336	0.5336	0.5336	0.5336							0.6043
YNL071W	LAT1	-0.4372	-0.4372	-0.4372	-0.4372	-0.4372	-0.4372	-0.4372	-0.4372	-0.4372	-0.4372	-0.4372	-0.4372	-0.4372	-0.4372	-0.3635	-0.3083	-0.3083	-0.3083	-0.3083	-0.3083	-0.3083	-0.3083	-0.3083	-0.3083	-0.3083	-0.3083	-0.3083	-0.3083	-0.242	-0.2255	-0.2255	-0.2255	-0.2255	-0.2255	-0.2255	-0.2255	-0.2255	-0.2255	-0.2255			-0.2759	-0.2759	-0.2759	-0.2759	-0.2759	-0.2759	-0.2759
YGL101W		-0.4074	-0.4074	-0.4074	-0.4074	-0.4074	-0.4074	-0.4074	-0.4074	-0.4074	-1.0045	-1.0045	-1.0045	-1.0045	-1.0045	-1.0045	-1.0045	-1.0045	-1.0045	-1.0045	-1.0045	-1.0045	-1.0045	-1.0045	-1.0045	-1.0045	-1.0045	-1.0045																				-1.1169	-1.1169
YOL031C	SIL1	-0.0168	-0.0168	-0.0168	-0.0168			-0.1411	-0.1411	-0.1411	-0.1411	-0.1411	-0.1411	-0.1411	-0.1411	-0.1411	-0.1411	-0.1411				-0.2492	-0.2492	-0.2492	-0.2492	-0.2492	-0.2492	-0.2492	-0.2492	-0.2492	-0.2492	-0.2492	-0.2492	-0.2492	-0.2492	-0.2492	0.0475	0.0475	0.0475	0.0475	0.0475	0.0475	0.0475	0.0475	0.0475	0.0475
YOR125C	CAT5	0.5714	0.5714	0.5714	0.5714	0.5714	0.2902	0.1028	0.1028	0.1028	0.1028	0.1028	0.1028	0.1028	0.1028	0.1028	0.1028	0.1028	0.1028	0.1028	0.1028		-0.4306	-0.4306	-0.4306	-0.4306	-0.4306	-0.4306	-0.4306	-0.4306	-0.4306	-0.4306	-0.4306	-0.4306														0.134	0.134
YLR070C	XYL2	-0.4313	-0.4313	-0.4313	-0.4313						-0.4119	-0.4119	-0.4119	-0.4119	-0.4119	-0.4119	-0.4119	-0.4119	-0.4119	-0.4119	-0.4119	-0.4119	-0.4119		-0.6222	-0.6222	-0.6222	-0.6222	-0.6222	-0.6222	-0.6222	-0.6222	-0.6222	-0.6222	-0.6222	-0.6222	-0.2546	-0.2546	-0.2546	-0.2546	-0.2546	-0.2546	-0.2546	-0.2546	-0.2546	-0.2546	-0.2546	-0.2546	-0.2546
YPL274W	SAM3	-0.6041	-0.6041	-0.6041	-0.6041	-0.7567	-0.8221	-0.8221	-0.8221	-0.8221	-0.8221	-0.8221	-0.8221	-0.8221	-0.8221	-0.8221	-0.8221	-0.8221	-0.8221	-0.8221	-0.8221	-0.8221	-0.8221																				-0.7763	-0.7763	-0.7763	-0.7763	-0.7763	-0.7763	-0.7763
YGL208W	SIP2	0.0334	0.0334	0.0334	0.0334	0.0334	0.0334	0.0334	0.0334			-0.1439	-0.1439	-0.1439	-0.1439	-0.1439	-0.1439	-0.1439	-0.1439	-0.1439	-0.1439	-0.1439				0.1731	0.1731	0.1731	0.1731	0.1731	0.1731	0.1731	0.1731	0.1731	0.1731	0.1731	0.1731	0.1731	0.1731	0.1637	0.1637	0.1637	0.1637	0.1637	0.1637	0.1637	0.1637	0.1637	0.1637
YDL209C	CWC2	0.3587	0.3587	0.3587	0.3587	0.3587	0.3587	0.3587	0.3587	0.3587	0.3587	0.3587	0.3587	0.3587	0.3587	-0.217	-0.217	-0.217	-0.217	-0.217	-0.217	-0.217	-0.217	-0.217	-0.217	-0.217	-0.217	-0.217	-0.217	-0.217	-0.217	-0.217
YMR039C	SUB1	-0.9738	-0.9738	-0.9738	-0.9738	-0.9738	-0.9738	-0.9738	-0.8577	-0.7997	-0.7997	-0.7997	-0.7997	-0.7997	-0.7997	-0.7997	-0.7997	-0.7997	-0.7997
YGR135W	PRE9	-0.5732	-0.5732	-0.5732	-0.5732	-0.5732	-0.5732	-0.5732	-0.5732	-0.5732	-0.5732	-0.5732	-0.5732	-0.5732	-0.5732					-0.107	-0.107	-0.107	-0.107	-0.107	-0.107	-0.107	-0.107	-0.107	-0.107	-0.107	-0.107	-0.107	-0.107	-0.107	-0.107	-0.107	-0.107								1.0653	1.0653	1.0653	1.0653	1.0653
YLR356W		-0.7671	-0.7671	-0.7671	-0.7671	-0.7671	-0.7671	-0.7671	-0.7671	-0.7671	-0.7671									-0.7087	-0.7087	-0.7087	-0.7087	-0.7087	-0.7087	-0.7087	-0.7087	-0.7087	-0.7087	-0.7087	-0.7087	-0.7087	-0.7087	-0.7087	-0.7087	-0.7087	-0.7087									0.1423	0.1423	0.1423	0.1423
YLR239C	LIP2	0.5302	0.5302	0.5302	0.5302	0.5302	0.5302	0.5302	0.5302	0.5302	0.6294	0.6294	0.6294	0.6294	0.6294	0.6294	0.6294	0.6294	0.6294	0.6294	0.6294	0.6294	0.6294	0.6243	0.6208	0.6208	0.6208	0.6208	0.6208	0.6208	0.6208	0.6208	0.6208	0.6208	0.6208	0.6208	0.6208	0.6208	0.6208										-0.1373
YJR008W		-0.4387	-0.4387	-0.4387	-0.4387	-0.4387	-0.4387	-0.4387	-0.4387	-0.4387	-0.4387	-0.4387	-0.4387	-0.4387	-0.4387	-0.4387		-0.2024	-0.2024	-0.2024	-0.2024	-0.2024	-0.2024	-0.2024	-0.2024	-0.2024	-0.2024										0.3888	0.3888	0.3888	0.3888	0.3888	0.3888	0.3888	0.3888	0.3888	0.3888	0.3888
YOR215C		-0.1411	-0.1411	-0.1411	-0.1411	-0.1411	-0.1411	-0.1411	-0.3779	-0.5358	-0.5358	-0.5358	-0.5358	-0.5358	-0.5358	-0.5358	-0.5358	-0.5358	-0.5358	-0.5358		-0.2881	-0.2881	-0.2881	-0.2881	-0.2881	-0.2881	-0.2881	-0.2881	-0.2881	-0.2881	-0.2881	-0.2881	-0.2881	-0.2881	-0.2881	-0.2881	-0.2881											-0.0262
YDL047W	SIT4
YJR122W	IBA57																					-0.7107	-0.7107	-0.7107	-0.7107	-0.7107	-0.7107	-0.7107	-0.7107	-0.7107	-0.7107	-0.7107	-0.7107	-0.7107	-0.7107	-0.7107													0.1335
YMR095C	SNO1	0.2354	0.1731	0.1731	0.1731	0.1731	0.1731	0.1731	0.1731	0.1731	0.1731	0.1731						0.0653	0.0653	0.0653	0.0653	0.0653	0.0653	0.0653	0.0653	0.0653	0.0653	0.0653	0.0653	0.0653	0.0653	0.0653	0.0653	0.0653	-0.1649	-0.2636	-0.2636	-0.2636	-0.2636	-0.2636	-0.2636	-0.2636	-0.2636	-0.2636	-0.2636	-0.2636	-0.2636	-0.2636	-0.2636
YCR051W			0.3664	0.3664	0.3664	0.3664	0.3664	0.3664	0.3664	0.3664	0.3664	0.3664	0.3664	0.3664	0.3664	0.3664	0.3664	0.3664	0.3664	-0.0757	-0.3409	-0.3409	-0.3409	-0.3409	-0.3409	-0.3409	-0.3409	-0.3409	-0.3409	-0.3409	-0.3409	-0.3409	-0.3409	-0.3409													-0.3122	-0.3122	-0.3122
YMR124W		-0.0179	-0.0179	-0.0179	-0.0179	-0.0179	-0.0179	-0.0179	-0.0179									-0.5651	-0.5651	-0.5651	-0.5651	-0.5651	-0.5651	-0.5651	-0.5651	-0.5651	-0.5651	-0.5651	-0.5651	-0.5651	-0.5651															-0.7116	-0.7116	-0.7116	-0.7116
YER186C			0.0298	0.0298	0.0298	0.0298	0.0298	0.0298	0.0298	0.0298	0.0298	0.0298	0.0298	0.0298	0.0298	0.0298	0.0298	0.134	0.134	0.134	0.134	0.134	0.134	0.134	0.134	0.134	0.134	0.134	0.134	0.134	0.134	0.134	0.134										-0.3573	-0.3573	-0.3573	-0.3573	-0.3573	-0.3573	-0.3573
YER044C	ERG28	0.0653	0.0653	0.0653	0.0653	0.0653	0.0653	0.0653	0.0653	0.0653			-0.9347	-0.9347	-0.9347	-0.9347	-0.9347	-0.9347	-0.9347	-0.9347	-0.9347	-0.9347	-0.5023	-0.5023	-0.5023	-0.5023	-0.5023	-0.5023	-0.5023	-0.5023	-0.5023	-0.5023	-0.5023	-0.5023	-0.5023	-0.5023													-1.2546
YPL066W																																																-0.9891	-0.9891
YDL067C	COX9	0.134	0.134	0.2556	0.438	0.438	0.438	0.438	0.438	0.438	0.438	0.438	0.438	0.438				0.0427	0.0427	0.0427	0.0427	0.0427	0.0427	0.0427	0.0427	0.0427	0.0427	0.0427	0.0427	0.0427	0.0427	0.0427	0.0427	0.0427	0.0427	0.0427			0.2681	0.2681	0.2681	0.2681	0.2681	0.2681	0.2681	0.2681	0.2681	0.2681	0.2681
YGL226W	MTC3					-0.4102	-0.4102	-0.4102	-0.4102	-0.4102	-0.4102	-0.4102	-0.4102	-0.4102	-0.4102	-0.4102	-0.4102	-0.4102	-0.4102	-0.4102	-0.4102	-0.4102	-0.3675	-0.3675	-0.3675	-0.3675	-0.3675	-0.3675	-0.3675	-0.3675	-0.3675	-0.3675	-0.3675	-0.3675	-0.3675	-0.3675	-0.3675	-0.3675	-0.3675	-0.3675
YKR003W	OSH6	-0.0835	-0.0835	-0.0835	-0.0835	-0.0835	-0.0835							-0.4669	-0.4669	-0.4669	-0.4669	-0.4669	-0.4669	-0.4669	-0.4669	-0.4669	-0.4669	-0.4669			0.1637	0.1637	0.1637	0.1637	0.1637	0.1637	0.1637	0.1637	0.1637	0.1637	0.1637	0.1637	0.1637	0.1637	0.1637	0.1637	0.1637	0.1637	0.1637
YIL077C		0.2266	0.2266	0.2266	0.2266	0.2266	0.2266	0.2266											0.7372	0.7372	0.7372	0.7372	0.7372	0.7372	0.7372	0.7372	0.7372	0.7372	0.7372	-0.2773	-0.2773	-0.2773	-0.2773	-0.2773	-0.2773	-0.2773	-0.2773	-0.2773	-0.2773	-0.2773	-0.2773	-0.2773	-0.2773	-0.2773	-0.2773
YMR295C		0.144	0.144	0.144	0.144	0.144	0.144	0.144	0.144	0.144	0.144	-0.2578	-0.5592	-0.5592	-0.5592	-0.5592	-0.5592	-0.5592	-0.5592	-0.5592	-0.5592	-0.5592	-0.5592	-0.5592	-0.5592	-0.5592	-0.5592					-0.5332	-0.5332	-0.5332	-0.5332	-0.5332	-0.5332	-0.5332	-0.5332	-0.5332	-0.5332	-0.5332	-0.5332			-0.5539	-0.5539	-0.5539	-0.5539
YJR145C	RPS4A
YLR150W	STM1	-0.5599	-0.5599	-0.5599	-0.5599	-0.5599	-0.5599	-0.5599	-0.5599	-0.5599	-0.5599	-0.5599	-0.5599	-0.5599	-0.5599	-0.5599
YCL001W	RER1	-0.2092	-0.2092	-0.0168	-0.0168	-0.0168	-0.0168	-0.0168	-0.0168	-0.0168	-0.0168	-0.0168	-0.0168	-0.0168	-0.0168	-0.0168								-0.2174	-0.2174	-0.2174	-0.2174	-0.2174	-0.2174	-0.2174	-0.2174	-0.2174	-0.2174	-0.2174	-0.2174	-0.2174
YEL060C	PRB1	-1.0554	-1.0554	-1.0554	-1.0554	-1.0554	-1.0554	-1.0554	-1.0554	-1.0554	-1.0554	-1.0554	-1.0554	-1.0554																																-0.0587	-0.0587	-0.0587	-0.0587
YPL051W	ARL3	0.5852	0.5852	0.5852	0.5852	0.5852				-0.5599	-0.5599	-0.5599	-0.5599	-0.5599	-0.5599	-0.5599	-0.5599	-0.5599	-0.5599	-0.5599	-0.5599											0.144	0.144	0.144	0.144	0.144	0.144	0.144	0.144	0.144	0.144	0.144
YOL082W	ATG19																																						-1.369	-1.369	-1.369	-1.369	-1.369	-1.369	-1.369	-1.369	-1.369	-1.369	-1.369
YNL093W	YPT53			-0.2198	-0.2198	-0.2198	-0.2198	-0.2198	-0.2198	-0.2198	-0.2198	-0.2198	-0.2198	-0.2198	-0.2198																							-0.3459	-0.3459	-0.3459	-0.3459	-0.3459	-0.3459	-0.3459	-0.3459	-0.3459	-0.3459	-0.3459	-0.3459
YHR088W	RPF1	-0.6329	-0.6329	-0.6329	-0.6329	-0.6329	-0.6329	-0.6329					-0.426	-0.426	-0.426	-0.426	-0.426	-0.426	-0.426	-0.426	-0.426	-0.426	-0.426	-0.426	-0.426	-0.426	-0.426	-0.426	-0.426	-0.426
YBR197C		-1.0042	-1.0042	-1.0042	-1.0042	-1.0042	-1.0042	-1.0042	-1.0042	-1.0042	-1.0042	-1.0042		-1.1697	-1.1697	-1.1697	-1.1697	-1.1697	-1.1697	-1.1697	-1.1697	-1.1697	-1.1697	-1.1697	-1.1697	-1.1697	-1.1697	-1.1697	-1.1697	-1.1697	-0.887	-0.3217	-0.3217	-0.3217	-0.3217	-0.3217	-0.3217	-0.3217	-0.3217	-0.3217	-0.3217
YML119W		-1.0322	-1.0322	-1.0322	-1.0322	-1.0322	-1.0322	-1.0322	-1.0322				-0.7588	-0.7588	-0.7588	-0.7588	-0.7588	-0.7588	-0.7588	-0.7588	-0.7588	-0.7588	-0.7588	-0.7588	-0.7588	-0.7588																							-0.037
YMR058W	FET3	-0.4372	-0.4372	-0.4372	-0.4372	-0.4372	-0.4372	-0.4372	-0.4372									0.2633	0.2633	0.2633	0.2633	0.2633	0.2633	0.2633	0.2633	0.2633	0.2633	0.2633	0.2633	0.2633	-0.1411	-1.0847	-1.0847	-1.0847	-1.0847	-1.0847	-1.0847	-1.0847	-1.0847	-1.0847	-1.0847	-1.0847	-1.0847					-0.0922	-0.0922
YJL024C	APS3									-0.8071	-0.8071	-0.8071	-0.8071	-0.8071	-0.8071	-0.8071	-0.8071	-0.8071	-0.8071	-0.8071	-0.8071																											-0.0085	-0.0085
YPR191W	QCR2	0.1057	0.1057	0.1057	0.1057	0.1057	0.1057	0.1057	0.1057	0.1057	0.1057	0.1057			-0.0608	-0.0608	-0.0608	-0.0608	-0.0608	-0.0608	-0.0608	-0.0608	-0.0608	-0.0608	-0.0608	-0.0608	-0.0608	-0.0608	-0.0608	-0.0608																-0.0076	-0.0076	-0.0076	-0.0076
YMR118C		-0.1904	-0.1904	-0.1904	-0.1904	-0.1904	-0.1904	-0.1904	-0.1904	-0.1904	-0.1904	-0.1904	-0.1904	-0.1904	-0.1477	-0.1477	-0.1477	-0.1477	-0.1477	-0.1477	-0.1477	-0.1477	-0.1477	-0.1477	-0.1477	-0.1477	-0.1477	-0.1477	-0.1477	-0.1477	-0.1477
YOR201C	MRM1	-0.6007	-0.6007	-0.6007	-0.6007	-0.7637	-0.8616	-0.8616	-0.8616	-0.8616	-0.8616	-0.8616	-0.8616	-0.8616	-0.8616	-0.8616	-0.8616	-0.8616	-0.8616	-0.8616	-0.8616	-0.8616	-1.1575	-1.1575	-1.1575	-1.1575	-1.1575	-1.1575	-1.1575	-1.1575	-1.1575	-1.1575	-1.1575	-1.1575	-1.1575	-1.1575	-1.1575
YLR250W	SSP120	0.0817	0.0817
YOR380W	RDR1		0.2908	0.2908	0.2908	0.2908	0.2908	0.2908	0.2908	0.2908	0.2908	0.2908	0.2908	0.2908	0.2908	0.2908	0.2908	0.4095	0.4332	0.4332	0.4332	0.4332	0.4332	0.4332	0.4332	0.4332	0.4332	0.4332	0.1032	0.1032	0.1032	0.1032	0.1032	0.1032	0.1032	0.1032	0.1032	0.1032	0.1032	0.1032
YOR004W	UTP23		-0.2744	-0.2744	-0.2744	-0.2744	-0.2744	-0.2744	-0.2744	-0.2744	-0.2744	-0.2744	-0.2744	-0.2744	-0.2744	-0.2744	-0.2744	-0.2744	-0.2744		0.1189	0.1189	0.1189	0.1189	0.1189	0.1189	0.1189	0.1189	0.1189	0.1189	0.1189	0.1189	0.1189	0.1189	0.1189
YNL290W	RFC3	-0.0587	-0.0587	0.1269	0.1269	0.1269	0.1269	0.1269	0.1269	0.1269	0.1269	0.1269	0.1269	0.1269	0.1269	0.1269	0.1269	0.1269	0.1269			0.3564	0.3564	0.3564	0.3564	0.3564	0.3564	0.3564	0.3564	0.3564	0.3564	0.3564	0.3564	0.3564	0.3564	0.3564
YMR132C	JLP2	0.2633	0.2633	0.2633	0.2633	0.2633	0.2633	0.2633	0.2633	0.2633	0.2633	0.2633	0.2633														0.144	0.144	0.144	0.144	0.144	0.144	0.144	0.144	0.144	0.144	0.144	0.144	0.144
YMR010W		-0.2622	-0.2622	-0.2622	-0.2622	-0.2622	-0.2622	-0.2622	-0.2622	-0.2622	-0.2622	-0.2622	-0.4696	-0.6251	-0.6251	-0.6251	-0.6251	-0.6251	-0.6251	-0.6251	-0.6251	-0.6251	-0.6251	-0.6251	-0.6251	-0.6251	-0.6251	-0.6251
YBR002C	RER2	0.1127	0.1127	0.5528	0.5528	0.5528	0.5528	0.5528	0.5528	0.5528	0.5528	0.5528	0.5528	0.5528	0.5528	0.5528	0.5528	0.5528			0.1246	0.1246	0.1246	0.1246	0.1246	0.1246	0.1246	0.1246	0.1246	0.1246	0.1246	0.1246	0.1246	0.1246	0.1246	0.1246	0.1246
YDL168W	SFA1				-0.3831	-0.3831	-0.3831	-0.3831	-0.3831	-0.3831	-0.3831	-0.3831	-0.3831	-0.3831	-0.3831	-0.3831	-0.3831						0.0527	0.0527	0.0527	0.0527	0.0527	0.0527	0.0527	0.0527	0.0527	0.0527	0.0527	0.0527													0.1681	0.1681	0.1681
YLR130C	ZRT2	-1.1327	-1.1327	-1.1327	-1.1327	-1.1327	-1.1327	-1.1327	-1.1327	-1.1327	-1.1327	-1.1327	-1.1327			-0.8179	-0.8179	-0.8179	-0.8179	-0.8179	-0.8179	-0.8179	-0.8179	-0.8179	-0.8179	-0.8179	-0.8179																				0.1779	0.1779	0.1779
YBR073W	RDH54	-0.3026	-0.3026	-0.3026	-0.3026	-0.3026	-0.3026	-0.3026	-0.3026	-0.3026	-0.3026	-0.3026	-0.3026	-0.3026	-0.3026	-0.3026	-0.3026		-0.3217	-0.3217	-0.3217	-0.3217	-0.3217	-0.3217	-0.3217	-0.3217	-0.3217	-0.3217	-0.3217	-0.3217	-0.3217	-0.3217	-0.3217	-0.3217	-0.3217	-0.3217												-0.2477	-0.2477
YDR318W	MCM21													0.2934	0.2934	0.2934	0.2934	0.2934	0.2934	0.2934	0.2934	0.2934	0.2934	0.2934	0.2934	0.2934	0.2934							-0.4042	-0.4042	-0.4042	-0.4042	-0.4042	-0.4042	-0.4042	-0.4042	-0.4042	-0.4042	-0.4042
YAR002C-A	ERP1	0.3993	0.3993	0.3746	0.1519	0.1519	0.1519	0.1519	0.1519	0.1519	0.1519	0.1519	0.1519	0.1519	0.1519	0.1519	0.1519	0.1519	0.1519	0.1009	-0.1029	-0.1029	-0.1029	-0.1029	-0.1029	-0.1029	-0.1029	-0.1029	-0.1029	-0.1029	-0.1029	-0.1029	-0.1029	-0.1029	-0.1029	-0.1029
YDL065C	PEX19	0.1072	0.1072	0.1072	0.3839	0.5025	0.5025	0.5025	0.5025	0.5025	0.5025	0.5025	0.5025	0.5025	0.5025	0.5025	0.5025	0.5025						-0.2842	-0.2842	-0.2842	-0.2842	-0.2842	-0.2842	-0.2842	-0.2842	-0.2842	-0.2842	-0.2842	-0.2842	-0.2842	-0.2842	-0.2842	-0.2842					0.6783	0.6783	0.6783	0.6783	0.6783	0.6783
YHR176W	FMO1	-0.0504	-0.0504	-0.0504	-0.0504	-0.0504	-0.0504	0.609	0.609	0.609	0.609	0.609	0.609	0.609	0.609	0.609	0.609	0.609	0.609	0.609	0.609	0.609	0.609	0.609	0.609		0.3304	0.3304	0.3304	0.3304	0.3304	0.3304	0.3304	0.3304	0.3304	0.3304	0.3304	0.3304	0.3304	0.3304	0.3304				0.0514	0.0514	0.0514	0.0514	0.0514
YML131W		-0.0262	-0.0262	-0.0262	-0.0262											-1.5332	-1.5332	-1.5332	-1.5332	-1.5332	-1.5332	-1.5332	-1.5332	-1.5332	-1.5332	-1.5332	-1.5332	-1.5332	-1.5332	-1.5332	-1.5332	-1.5332	-1.5332			-0.4852	-0.4852	-0.4852	-0.4852	-0.4852	-0.4852	-0.4852	-0.4852	-0.4852	-0.4852	-0.4852
YFR001W	LOC1																							-0.4804	-0.4804	-0.4804	-0.4804	-0.4804	-0.4804	-0.4804	-0.4804	-0.4804	-0.4804	-0.4804	-0.4804	-0.4804
YDR487C	RIB3	-0.553	-0.553	-0.553	-0.553	-0.553	-0.553	-0.553	-0.553	-0.553	-0.553	-0.553	-0.553
YPL003W	ULA1	-0.1808	-0.1808	-0.1808	-0.1808	-0.1808	-0.1808	-0.1808	-0.1808	-0.1808	-0.1808	-0.1808	-0.1808	-0.1808	-0.1675	-0.0872	-0.0872	-0.0872	-0.0872	-0.0872	-0.0872	-0.0872	-0.0872	-0.0872	-0.0872	-0.0872	-0.0872													0.0706	0.0706	0.0706	0.0706	0.0706	0.0706	0.0706	0.0706	0.0706	0.0706
YER158C																																					-0.866	-0.866	-0.866	-0.866	-0.866	-0.866	-0.866	-0.866	-0.866	-0.866	-0.866	-0.866	-0.866
YGL237C	HAP2	-0.4042	-0.4042	-0.4042	-0.4042	-0.4042	-0.4042	-0.4042	-0.4042	-0.3979	-0.3668	-0.3668	-0.3668	-0.3668	-0.3668	-0.3668	-0.3668	-0.3668	-0.3668	-0.3668	-0.6864	-0.8234	-0.8234	-0.8234	-0.8234	-0.8234	-0.8234	-0.8234	-0.8234	-0.8234	-0.8234	-0.8234	-0.8234	-0.8234	-0.8234	-0.8234												-0.3468	-0.3468
YML046W	PRP39	-0.1102	-0.1102		-0.3858	-0.3858	-0.3858	-0.3858	-0.3858	-0.3858	-0.3858	-0.3858	-0.3858	-0.3858	-0.3858	-0.3858	-0.3858	-0.3858		0.1779	0.1779	0.1779	0.1779	0.1779	0.1779	0.1779	0.1779	0.1779	0.1779	0.1779																	-0.1892	-0.1892	-0.1892
YBR020W	GAL1									0.2998	0.2998	0.2998	0.2998	0.2998	0.2998	0.2998	0.2998	0.2998	0.2998	0.2998	0.2998	0.3888	0.3888	0.3888	0.3888	0.3888	0.3888	0.3888	0.3888	0.3888	0.3888	0.3888	0.3888	0.3888	0.3888		-0.0403	-0.0403	-0.0403	-0.0403	-0.0403	-0.0403	-0.0403	-0.0403	-0.0403	-0.0403	-0.0403	-0.0403	-0.0403
YGR053C																																						-0.3217	-0.3217	-0.3217	-0.3217	-0.3217	-0.3217	-0.3217	-0.3217	-0.3217	-0.3217	-0.2409	-0.2062
YDL099W	BUG1	0.3047	0.3047	0.3047	0.3047			0.7658	0.7658	0.7658	0.7658	0.7658	0.7658	0.7658	0.7658	0.7658	0.7658	0.7658	0.7658	0.7658	0.7658	0.3279	0.1089	0.1089	0.1089	0.1089	0.1089	0.1089	0.1089	0.1089	0.1089	0.1089	0.1089	0.1089	0.1089	0.1089	0.1089	0.1089	0.1089	0.1089									-0.028
YNL035C														-0.1448	-0.1448	-0.1448	-0.1448	-0.1448	-0.1448	-0.1448	-0.1448	-0.1448	-0.1448	-0.1448	-0.1448	-0.1448	-0.1448	-0.1448	-0.1448	-0.1448
YHR092C	HXT4										0.0409	0.0409	0.0409	0.0409	0.0409	0.0409	0.0409	0.0409	0.0409	0.0409	0.0409	0.0409	0.0409	0.0409	0.0409	0.0409	0.0409	0.0409	0.0409			-0.8453	-0.8453	-0.8453	-0.8453	-0.8453	-0.8453	-0.8453	-0.8453	-0.8453	-0.8453	-0.8453	-0.8453
YPR063C				-0.7277	-0.7277	-0.7277	-0.7277	-0.7277	-0.7277	-0.7277	-0.7277	-0.7277	-0.7277	-0.7277	-0.7277	-0.3217	-0.3217	-0.3217	-0.3217	-0.3217	-0.3217	-0.3217	-0.3217	-0.3217	-0.3217	-0.3217	-0.3033	-0.3033	-0.3033	-0.3033	-0.3033	-0.3033	-0.3033	-0.3033	-0.3033	-0.3033	-0.3033	-0.3033	-0.3033	-0.3033	-0.3033							-0.3582	-0.3582
YNR074C	AIF1	-0.1067	-0.1067	-0.1067	-0.1067	-0.1067	-0.1067	-0.1067	-0.1067	-0.1067										0.1808	0.1808	0.1808	0.1808	0.1808	0.1808	0.1808	0.1808	0.1808	0.1808	0.1808
YIR029W	DAL2							0.1724	0.1724	0.1724	0.1724	0.1724	0.1724	0.1724	0.1724	0.1724	0.1724	0.1724												-0.0626	-0.0626	-0.0626	-0.0626	-0.0626	-0.0626	-0.0626	-0.0626	-0.0626	-0.0626	-0.0626	-0.0626	-0.0626	-0.0626
YDL124W													-1.3775	-1.3775	-1.3775	-1.3775	-1.3775	-1.3775	-1.3775	-1.3775	-1.3775	-1.3775	-1.3775	-1.3775	-1.3775	-1.3775	-1.3775	-1.3775	-1.3775	-1.3775					-0.8836	-0.8836	-0.8836	-0.8836	-0.8836	-0.8836	-0.8836	-0.8836	-0.8836	-0.8836	-0.8836	-0.8836	-0.8836	-0.8836
YIL008W	URM1															-0.4255	-0.4255	-0.4255	-0.4255	-0.4255	-0.4255	-0.4255	-0.4255	-0.4255	-0.4255	-0.4255	-0.4255	-0.4255	-0.4255	-0.4255	-0.4255		-0.5441	-0.5441	-0.5441	-0.5441	-0.5441	-0.5441	-0.5441	-0.5441	-0.5441	-0.5441	-0.5441
YGL004C	RPN14							-0.0993	-0.0993	-0.0993	-0.0993	-0.0993	-0.0993	-0.0993	-0.0993	-0.0993	-0.0993	-0.0993	-0.0993	-0.0993	-0.0993	-0.0993	-0.0993	-0.0993				-0.121	-0.121	-0.121	-0.121	-0.121	-0.121	-0.121	-0.121	-0.121	-0.121	-0.121	-0.121
YBR223C	TDP1	0.7741	0.7741	0.7741	0.7741	0.7741	0.7741					0.589	0.589	0.589	0.589	0.589	0.589	0.589	0.589	0.589	0.589	0.589										0.0933	0.0933	0.0933	0.0933	0.0933	0.0933	0.0933	0.0933	0.0933	0.0933	0.0933	0.0933	0.0933	0.0933				-0.4647
YGR159C	NSR1	-0.4066	-0.4066	-0.2947	-0.1269	-0.1269	-0.1269	-0.1269	-0.1269	-0.1269	-0.1269	-0.1269	-0.1269	-0.1269	-0.1269	-0.1269	-0.1269	-0.1269	-0.1269			-0.5261	-0.5261	-0.5261	-0.5261	-0.5261	-0.5261	-0.5261	-0.5261	-0.5261	-0.5261	-0.5261
YGR101W	PCP1	0.1417	0.1417	0.1417	0.1417	0.1417	0.1417	0.1417	0.1417	0.1417	0.1417	0.1417	0.1417	0.1417	0.1417	0.1417	0.1417	0.1417			0.1458	0.1458	0.1458	0.1458	0.1458	0.1458	0.1458	0.1458	0.1458	0.1458	0.1458	0.1458	0.1458	0.1458	0.1458														-0.1647
YHL012W							0.4153	0.4153	0.4153	0.4153	0.4153	0.4153	0.4153	0.4153	0.4153	0.4153	0.4153	0.4153	0.4153	0.4153	-0.2811	-0.2811	-0.2811	-0.2811	-0.2811	-0.2811	-0.2811	-0.2811	-0.2811	-0.2811	-0.2811	-0.2811															0.0095	0.0095	0.0095
YDR377W	ATP17	-0.3612	-0.3612	-0.3612	-0.3612	-0.3612	-0.3612	-0.3612	-0.3612	-0.3612	-0.3612	-0.3612	-0.3612	-0.3612	-0.3612	-0.0949	-0.0949	-0.0949	-0.0949	-0.0949	-0.0949	-0.0949	-0.0949	-0.0949	-0.0949	-0.0949	-0.0949	-0.0949	-0.0949
YBR185C	MBA1	0.5958	0.5958	0.5958	0.5958	0.5958	0.5958				-0.6336	-0.6336	-0.6336	-0.6336	-0.6336	-0.6336	-0.6336	-0.6336	-0.6336	-0.6336	-0.6336	-0.6336				-0.5775	-0.5775	-0.5775	-0.5775	-0.5775	-0.5775	-0.5775	-0.5775	-0.5775	-0.5775	-0.5775	-0.5775	-0.5775	-0.5775	-0.5775	-0.5775								0.1157
YGR156W	PTI1				-0.8242	-0.8242	-0.8242	-0.8242	-0.8242	-0.8242	-0.8242	-0.8242	-0.8242	-0.8242	-0.8242			-0.1904	-0.1904	-0.1904	-0.1904	-0.1904	-0.1904	-0.1904	-0.1904	-0.1904	-0.1904	-0.1904	-0.1904																		-0.1943	-0.1943	-0.1943
YDR403W	DIT1	0.3395	0.3395	0.3395	0.3395				0.3763	0.3763	0.3763	0.3763	0.3763	0.3763	0.3763	0.3763	0.3763	0.3763	0.3763	0.3763	0.3763	0.3763	0.3763	0.3763	0.3763									0.0002	0.0002	0.0002	0.0002	0.0002	0.0002	0.0002	0.0002	0.0002	0.0002	0.0002	0.0002	0.0002	0.0368	0.0734	0.0734
YML001W	YPT7	0.0204	0.0204	0.0204	0.0204	0.0204	0.0204	0.0204	0.0204	0.0204	0.0204	0.0204	0.0204	0.0204	0.0204	0.0204	0.0204	0.0204	0.0204																													-0.264	-0.264
YDR352W		-0.4472	-0.4472	-0.4472	-0.4472	-0.4472	-0.4472	-0.4472	-0.4472	-0.4472	-0.4868	-0.4868	-0.4868	-0.4868	-0.4868	-0.4868	-0.4868	-0.4868	-0.4868	-0.4868	-0.4868	-0.4868																										-0.1557	-0.1557
YPR061C	JID1	-0.356	-0.356	-0.356	-0.356	-0.356	-0.356	-0.356	-0.356	-0.356	-0.356	-0.356	-0.356	-0.356	-0.356	-0.4418	-0.5847	-0.5847	-0.5847	-0.5847	-0.5847	-0.5847	-0.5847	-0.5847	-0.5847	-0.5847	-0.5847	-0.5847	-0.5847	-0.5847	-0.5847	-0.5847							0.1929	0.1929	0.1929	0.1929	0.1929	0.1929	0.1929	0.1929	0.1929	0.1929	0.1929
YLR008C	PAM18	0.3727	0.3135	0.3135	0.3135	0.3135	0.3135	0.3135	0.3135	0.3135	0.3135	0.3135	0.3135	0.3135	0.3135	0.3135	0.3135				0.1962	0.1962	0.1962	0.1962	0.1962	0.1962	0.1962	0.1962	0.1962	0.1962	0.1962	0.1962								0.0345	0.0345	0.0345	0.0345	0.0345	0.0345	0.0345	0.0345	0.0345	0.0345
YPR003C		0.0527	0.0527	0.0527	0.0527	0.0527				-0.5847	-0.5847	-0.5847	-0.5847	-0.5847	-0.5847	-0.5847	-0.5847	-0.5847	-0.5847	-0.5847	-0.5847	-0.5847	-0.5847	-0.5847	-0.5847																							-0.0755	-0.0755
YFR003C	YPI1	0.0726	0.0726	0.0726	0.0726	0.4615	0.5263	0.5263	0.5263	0.5263	0.5263	0.5263	0.5263	0.5263	0.5263	0.5263	0.5263	0.5263	0.5263	0.5263	0.5263	0.5263	0.5078	0.4153	0.4153	0.4153	0.4153	0.4153	0.4153	0.4153	0.4153	0.4153	0.4153	0.4153	0.4153	0.4153	0.4153	0.4153	0.4954	0.4954	0.4954	0.4954	0.4954	0.4954	0.4954	0.4954	0.4954	0.4954	0.4954
YIL083C																														-0.3602	-0.3602	-0.3602	-0.3602	-0.3602	-0.3602	-0.3602	-0.3602	-0.3602	-0.3602	-0.3602	-0.3602	-0.3602	-0.3602					-0.5076	-0.5076
YML042W	CAT2	0.2218	0.2218	0.2218	0.2218	0.2218	0.2218	0.2218	0.2218	0.2218					0.3337	0.3337	0.3337	0.3337	0.3337	0.3337	0.3337	0.3337	0.3337	0.3337				0.8158	0.8158	0.8158	0.8158	0.8158	0.8158	0.8158	0.8158	0.8158	0.8158	0.8158					0.197	0.197	0.197	0.197	0.197	0.197	0.197
YGL091C	NBP35	-0.0702	-0.0702	-0.0702	-0.0702	0.0726	0.0726	0.0726	0.0726	0.0726	0.0726	0.0726	0.0726	0.0726	0.0726	0.0726	0.0726	0.0726	0.0726	0.0726	0.0726	0.0726	-0.0336	-0.1045	-0.1045	-0.1045	-0.1045	-0.1045	-0.1045	-0.1045	-0.1045	-0.1045	-0.1045	-0.1045	-0.1045	-0.1045	-0.1045	-0.1045	-0.1045	-0.1045
YDR148C	KGD2	0.4977	0.4977	0.4977	0.4977	0.4977	0.4977	0.4977	0.4977	0.4977	0.4977	0.4977	0.4977	0.4977	0.419	0.4102	0.4102	0.4102	0.4102	0.4102	0.4102	0.4102	0.4102	0.4102	0.4102	0.4102	0.4102	0.4102	0.4102	0.4102	0.4102								0.4027	0.4027	0.4027	0.4027	0.4027	0.4027	0.4027	0.4027	0.4027	0.4027	0.4027
YGL220W	FRA2	-0.24	-0.24	-0.24	-0.24	-0.24						-0.0221	-0.0221	-0.0221	-0.0221	-0.0221	-0.0221	-0.0221	-0.0221	-0.0221	-0.0221	-0.0221	-0.0221	-0.0221	-0.0221	-0.0221	0.1216	0.1832	0.1832	0.1832	0.1832	0.1832	0.1832	0.1832	0.1832	0.1832	0.1832	0.1832	0.1832	0.1832	0.1832	0.1832	0.1832				-0.3352	-0.3352	-0.3352
YGR085C	RPL11B
YPR001W	CIT3	0.1308	0.1308	0.1308	0.1308	0.1308	0.1308																									-0.3904	-0.3904	-0.3904	-0.3904	-0.3904	-0.3904	-0.3904	-0.3904	-0.3904	-0.3904	-0.3904	-0.9462	-0.9462	-0.9462	-0.9462	-0.9462	-0.9462	-0.9462
YLL012W	YEH1
YMR260C	TIF11	-0.2711	-0.2711	-0.2711	-0.2711							-0.4986	-0.4986	-0.4986	-0.4986	-0.4986	-0.4986	-0.4986	-0.4986	-0.4986	-0.4986	-0.4986	-0.4986
YOR056C	NOB1	-0.4916	-0.4916	-0.4916	-0.4916	-0.4916	-0.4916	-0.4916	-0.4916	-0.4916	-0.4916	-0.4916	-0.4916	-0.4916								-0.2062	-0.2062	-0.2062	-0.2062	-0.2062	-0.2062	-0.2062	-0.2062	-0.2062	-0.2062	-0.2062	-0.2062	-0.2062	-0.2062	-0.2062	-0.2062	-0.2062	-0.2062	-0.2062
YIL117C	PRM5	-1.0354							-0.8363	-0.8363	-0.8363	-0.8363	-0.8363	-0.8363	-0.8363	-0.8363	-0.8363	-0.8363	-0.8363	-0.8363																													-1.1448
YGR206W	MVB12	-0.217	-0.217	-0.217	-0.217	-0.217	-0.2711	-0.3794	-0.3794	-0.3794	-0.3794	-0.3794	-0.3794	-0.3794	-0.3794	-0.3794	-0.3794	-0.3794												-0.9998	-0.9998	-0.9998	-0.9998	-0.9998	-0.9998	-0.9998	-0.9998	-0.9998	-0.9998
YPL131W	RPL5	-0.5115	-0.5115							-1.2198	-1.2198	-1.2198	-1.2198	-1.2198	-1.2198	-1.2198	-1.2198	-1.2198	-1.2198	-1.2198
YFL044C	OTU1	0.3539	0.3539									0.0204	0.0204	0.0204	0.0204	0.0204	0.0204	0.0204	0.0204	0.0204	0.0204	0.0204	0.0204	0.0204	0.0204	0.0204	0.0204	-0.5683	-0.5683	-0.5683	-0.5683	-0.5683	-0.5683	-0.5683	-0.5683	-0.5683	-0.5683	-0.5683	-0.5683	-0.5683				0.0262	0.0262	0.0262	0.0262	0.0262	0.0262
YJR004C	SAG1	0.754	0.754	0.5074	0.3595	0.3595	0.3595	0.3595	0.3595	0.3595	0.3595	0.3595	0.3595	0.3595	0.3595	0.3595			-0.2451	-0.2451	-0.2451	-0.2451	-0.2451	-0.2451	-0.2451	-0.2451	-0.2451	-0.2451	-0.2451	-0.2451	-0.2451	-0.2451	-0.2451	-0.2451	-0.2451	-0.2451	-0.2451
YPL221W	FLC1																										-1.2332	-1.2332	-1.2332	-1.2332	-1.2332	-1.2332	-1.2332	-1.2332	-1.2332	-1.2332	-1.2332	-1.2332	-1.2332	-1.2332	-1.2332	-1.2332	-1.2332
YBR193C	MED8	0.2633	0.2633	0.2633	0.2633		0.6377	0.6377	0.6377	0.6377	0.6377	0.6377	0.6377	0.6377	0.6377	0.6377	0.6377	0.6377	0.6377	0.6377	0.6377	0.6377	0.6377	0.6377							-0.0664	-0.0664	-0.0664	-0.0664	-0.0664	-0.0664	-0.0664	-0.0664	-0.0664	-0.0664	-0.0664	-0.0664	-0.0664	-0.0664	-0.0664	-0.0664
YIL113W	SDP1	-0.7002	-0.7002	-0.7002	-0.7002												-1.1884	-1.1884	-1.1884	-1.1884	-1.1884	-1.1884	-1.1884	-1.1884	-1.1884	-1.1884	-1.1884	-1.1884	-1.1884	-0.3806	-0.3806	-0.3806	-0.3806	-0.3806	-0.3806	-0.3806	-0.3806	-0.3806	-0.3806	-0.3806	-0.3806			-0.2616	-0.2616	-0.2616	-0.2616	-0.2616	-0.2616
YKL117W	SBA1	0.972	0.972	0.972	0.972				0.0002	0.0002	0.0002	0.0002	0.0002	0.0002	0.0002	0.0002	0.0002	0.0002	0.0002	0.0002	0.0002	0.0002	0.0002																								-0.129	-0.129	-0.129
YPL218W	SAR1	-0.2628	-0.2628	-0.2628	-0.2628	-0.2628	-0.2628	-0.2628	-0.2628	-0.2628	-0.2628	-0.2628										-1.0684	-1.0684	-1.0684	-1.0684	-1.0684	-1.0684	-1.0684	-1.0684	-1.0684	-1.0684	-1.0684	-1.0684	-1.0684	-1.0684	-1.0684		-0.1448	-0.1448	-0.1448	-0.1448	-0.1448	-0.1448	-0.1448	-0.1448	-0.1448	-0.1448	-0.1448
YGR167W	CLC1	-0.7912	-0.7912	-0.7912	-0.7912	-0.7912	-0.7912	-0.7912	-0.7912	-0.7912	-0.7912	-0.7912						-0.3217	-0.3217	-0.3217	-0.3217	-0.3217	-0.3217	-0.3217	-0.3217	-0.3217	-0.3217	-0.3217	-0.3217	-0.3217	-0.3217	-0.3217	-0.3217	-0.3217	-0.3217														-0.2423
YMR180C	CTL1	-0.1041	-0.1041	-0.1041	-0.1041	-0.1041		-0.3217	-0.3217	-0.3217	-0.3217	-0.3217	-0.3217	-0.3217	-0.3217	-0.3217	-0.2961	-0.0654	-0.0654	-0.0654	-0.0654	-0.0654	-0.0654	-0.0654	-0.0654	-0.0654	-0.0654	-0.0654	-0.0654	-0.0654	-0.0654	-0.0654	-0.0654	-0.0654	-0.0654
YMR008C	PLB1	-0.9207	-0.9207	-0.9207	-0.9207	-0.9207	-0.9207	-0.9207	-0.9207	-0.9207		-0.888	-0.888	-0.888	-0.888	-0.888	-0.888	-0.888	-0.888	-0.888	-0.888	-0.888	-0.888	-0.888	-0.7836	-0.714	-0.714	-0.714	-0.714	-0.714	-0.714	-0.714	-0.714	-0.714	-0.714	-0.714				-0.6937	-0.6937	-0.6937	-0.6937	-0.6937	-0.6937	-0.6937	-0.6937	-0.6937	-0.6937
YLR448W	RPL6B	-1.0766	-1.0766	-1.0766	-1.0766	-1.0766	-1.0766	-1.0766	-1.0766	-1.0766	-1.0766
YHL036W	MUP3	0.1528	0.1528	0.1528											0.1583	0.1583	0.1583	0.1583	0.1583	0.1583	0.1583	0.1583	0.1583	0.1583	0.1583	0.1583	0.1583	0.1583	0.1583	0.1583	0.1583	0.0602	0.0602	0.0602	0.0602	0.0602	0.0602	0.0602	0.0602	0.0602	0.0602	0.0602	0.0602		-0.0379	-0.0379	-0.0379	-0.0379	-0.0379
YHR189W	PTH1	0.3373	0.3373	0.3373	0.3373	0.3373	0.3373	0.4037	0.4701	0.4701	0.4701	0.4701	0.4701	0.4701	0.4701	0.4701	0.4701	0.4701	0.4701	0.4701	0.4701	0.4701	0.4701	0.4701	0.4701	0.1258	0.1258	0.1258	0.1258	0.1258	0.1258	0.1258	0.1258	0.1258	0.1258	0.1258	0.1258	0.1258	0.1258	0.1258									-0.135
YJL173C	RFA3	-0.2193	-0.2193	-0.2193	-0.2193	-0.2193	-0.2193	-0.4453	-0.4453	-0.4453	-0.4453	-0.4453	-0.4453	-0.4453	-0.4453	-0.4453	-0.4453	-0.4453	-0.4453	-0.4453					-0.6557	-0.6557	-0.6557	-0.6557	-0.6557	-0.6557	-0.6557	-0.6557	-0.6557	-0.6557	-0.6557	-0.6557	-0.6557	-0.6557	-0.6557	-0.6557
YGR065C	VHT1	-0.4319	-0.4319	-0.4319				-0.369	-0.369	-0.369	-0.369	-0.369	-0.369	-0.369	-0.369	-0.369	-0.369	-0.369	-0.369	-0.369	-0.369	-0.369	-0.369	-0.4546	-0.6543	-0.6543	-0.6543	-0.6543	-0.6543	-0.6543	-0.6543	-0.6543	-0.6543	-0.6543	-0.6543	-0.6543	-0.6543	-0.6543	-0.6543							-0.3217	-0.3217	-0.3217	-0.3217
YDL093W	PMT5	-1.0221	-1.0221	-1.0221	-1.0221	-1.0221	-1.0221	-1.0221	-1.0221	-1.0221	-1.0221	-1.0221	-1.0221	-1.0221	-1.0221	-1.0221	-1.0221								-0.1749	-0.1749	-0.1749	-0.1749	-0.1749	-0.1749	-0.1749	-0.1749	-0.1749	-0.1749	-0.1749	-0.1749	-0.1749	-0.1749	-0.1749	-0.1749	-0.1749	-0.1749
YDL193W	NUS1	-0.0904							-0.3497	-0.3497	-0.3497	-0.3497	-0.3497	-0.3497	-0.3497	-0.3497	-0.3497	-0.3497	-0.3497																												0.2034	0.2034	0.2034
YNL280C	ERG24	-0.6139			-0.1411	-0.1411	-0.1411	-0.1411	-0.1411	-0.1411	-0.1411	-0.1411	-0.1411	-0.1411	-0.1411	-0.1411	-0.1411																							-0.455	-0.455	-0.455	-0.455	-0.455	-0.455	-0.455	-0.455	-0.455	-0.455
YCR079W	PTC6	0.5298	0.5298	0.5298	0.5298	0.5298	0.5298	0.5298	0.5949	0.5949	0.5949	0.5949	0.5949	0.5949	0.5949	0.5949	0.5949	0.5949	0.5949	0.5949	0.5949			0.3486	0.3486	0.3486	0.3486	0.3486	0.3486	0.3486	0.3486	0.3486	0.3486	0.3486	0.3486	0.3486	0.3486	0.3486	0.3486	0.3486	0.3486
YIL003W	CFD1										-0.1518	-0.1518	-0.1518	-0.1518	-0.1518	-0.1518	-0.1518	-0.1518	-0.1518	-0.1518	-0.1518		-0.3514	-0.3514	-0.3514	-0.3514	-0.3514	-0.3514	-0.3514	-0.3514	-0.3514	-0.3514	-0.3514	-0.3514	-0.3514	-0.3514	-0.3514	-0.3514	-0.3514	-0.3514
YLL042C	ATG10	-0.5804	-0.5804	-0.5804	-0.5804	-0.5804	-0.5804	-0.5804	-0.5804	-0.5804	-0.5804	-0.5804		-0.4066	-0.4066	-0.4066	-0.4066	-0.4066	-0.4066	-0.4066	-0.4066	-0.4066	-0.4066	-0.4066	-0.4066	-0.4066	-0.4066	-0.4066	-0.4066	-0.4066	-0.4066
YKR007W	MEH1	-0.1102	-0.1102	-0.1102	0.1024	0.1024	0.1024	0.1024	0.1024	0.1024	0.1024	0.1024	0.1024	0.1024	0.1024	0.1024	0.1024	0.1024	0.1024	0.1024		-0.0177	-0.0177	-0.0177	-0.0177	-0.0177	-0.0177	-0.0177	-0.0177	-0.0177	-0.0177	-0.0177	-0.0177	-0.0177	-0.0177	-0.0177	-0.0177	-0.0177
YMR222C	FSH2	-0.0773	-0.0773	-0.0773	-0.0773	-0.0773	-0.0773	-0.0773	-0.0773	-0.0773	-0.0773	-0.1332	-0.1332	-0.1332	-0.1332	-0.1332	-0.1332	-0.1332	-0.1332	-0.1332	-0.1332	-0.1332	-0.1332	-0.1332	-0.1332	-0.1332	-0.1332	-0.1332	-0.1332
YNR001C	CIT1	-0.7578	-0.7578	-0.7578	-0.7578	-0.7578	-0.7578	-0.7578	-0.7578	-0.7578	-0.7578								-0.8836	-0.8836	-0.8836	-0.8836	-0.8836	-0.8836	-0.8836	-0.8836	-0.8836	-0.8836	-0.8836										-0.6696	-0.6696	-0.6696	-0.6696	-0.6696	-0.6696	-0.6696	-0.6696	-0.6696	-0.6696	-0.6696
YJL218W			-0.4529	-0.4529	-0.4529	-0.4529	-0.4529	-0.4529	-0.4529	-0.4529	-0.4529	-0.4529	-0.4529	-0.4529	-0.4529	-0.4529					-0.1962	-0.1962	-0.1962	-0.1962	-0.1962	-0.1962	-0.1962	-0.1962	-0.1962	-0.1962	-0.1962	-0.1962	-0.1962	-0.1962												-0.5491	-0.5491	-0.5491	-0.5491
YOR100C	CRC1											-1.0552	-1.0552	-1.0552	-1.0552	-1.0552	-1.0552	-1.0552	-1.0552	-1.0552	-1.0552	-1.0552	-1.0552	-1.0552	-1.0552	0.1713	0.1713	0.1713	0.1713	0.1713	0.1713	0.1713	0.1713	0.1713	0.1713	0.1713	0.1713	0.1713	0.1713	0.1347	0.1347	0.1347	0.1347	0.1347	0.1347	0.1347	0.1347	0.1347	0.1347
YOR136W	IDH2	-0.9497	-0.9497	-0.9497	-0.9497	-0.9497	-0.9497	-0.9497	-0.9497	-0.9497	-0.9497	-0.9497	-0.9497	-0.9497	-0.9497	-0.9497	-0.9497
YMR220W	ERG8	-0.954	-0.954	-0.954	-0.954	-0.954	-0.954	-0.954	-0.954	-0.954	-0.954													-0.6139	-0.6139	-0.6139	-0.6139	-0.6139	-0.6139	-0.6139	-0.6139	-0.6139	-0.6139	-0.6139	-0.6139											-0.6076	-0.6076	-0.6076	-0.6076
YCL035C	GRX1	0.1575	0.1575	0.1575	0.1575	0.1575	0.1575	0.1575	0.1575	0.1575	0.1575	0.1575	0.1575	0.1575	0.1575	0.1575	0.1575	0.1575	0.1575										-0.5578	-0.5578	-0.5578	-0.5578	-0.5578	-0.5578	-0.5578	-0.5578	-0.5578	-0.5578	-0.5578	-0.5578	-0.5578	-0.5578	-0.5578	-0.5578	-0.5578				-0.1442
YMR274C	RCE1	-0.4061							-0.9591	-0.9591	-0.9591	-0.9591	-0.9591	-0.9591	-0.9591	-0.9591	-0.9591	-0.9591	-0.9591	-0.9591	-0.9591
YKL107W		-0.0262	-0.0262	-0.0262	-0.0262	-0.0262	-0.0262	-0.0262	-0.0262	-0.0262	-0.0262	-0.0262	-0.0262	-0.0262	-0.0262	-0.0262	-0.008	0.1015	0.1015	0.1015	0.1015	0.1015	0.1015	0.1015	0.1015	0.1015	0.1015	0.1015	0.1015	0.1015	0.1015	0.1015	0.1015	0.1015					0.2144	0.2144	0.2144	0.2144	0.2144	0.2144	0.2144	0.2144	0.2144	0.2144	0.2144
YDR079C-A	TFB5	0.6444	0.6444	0.6444	0.6444	0.6444	0.6444						-0.0035	-0.0035	-0.0035	-0.0035	-0.0035	-0.0035	-0.0035	-0.0035	-0.0035	-0.0035	-0.0035	-0.0035	-0.0035	-0.0035	-0.0035		0.3819	0.3819	0.3819	0.3819	0.3819	0.3819	0.3819	0.3819	0.3819	0.3819
YHR101C	BIG1	0.7953	0.7953	0.7953	0.7953	0.7953	0.7953	0.7953	0.7953	0.7953	0.7953	0.7953	0.7953	0.7953	0.7953	0.7953	0.7953	0.7953							0.1164	0.1164	0.1164	0.1164	0.1164	0.1164	0.1164	0.1164	0.1164	0.1164	0.1164	0.1164	0.1164						0.1668	0.1668	0.1668	0.1668	0.1668	0.1668	0.1668
YPR113W	PIS1	0.9529	0.9529	0.9529	0.9529	0.916	0.8605	0.8605	0.8605	0.8605	0.8605	0.8605	0.8605	0.8605	0.8605	0.8605	0.8605	0.5231	0.4857	0.4857	0.4857	0.4857	0.4857	0.4857	0.4857	0.4857	0.4857	0.4857	0.4857	0.4857																0.108	0.108	0.108	0.108
YML116W	ATR1	-0.7921	-0.7921	-0.7921	-0.7921	-0.7921	-0.7921	-0.7921	-0.7921	-0.7921	-0.7921	-0.7921	-0.7921	-0.7921	-0.7921	-0.7921	-0.7921	-0.7921	-0.7921				-0.3556	-0.3556	-0.3556	-0.3556	-0.3556	-0.3556	-0.3556	-0.3556	-0.3556	-0.3556	-0.3556	-0.4822	-0.4822	-0.4822	-0.4822	-0.4822	-0.4822	-0.4822	-0.4822	-0.4822	-0.4822	-0.4822	-0.4822	-0.4822
YER134C		-0.3761	-0.3761	-0.3761				0.0726	0.0726	0.0726	0.0726	0.0726	0.0726	0.0726	0.0726	0.0726	0.0726	0.0726	0.0726					0.1046	0.1046	0.1046	0.1046	0.1046	0.1046	0.1046	0.1046	0.1046	0.1046	0.1046	0.1046	0.1046	0.1046	0.1046	0.1046	0.5923	0.6532	0.6532	0.6532	0.6532	0.6532	0.6532	0.6532	0.6532	0.6532
YFR024C-A	LSB3	0.1764	0.1764	0.1764	0.1764	0.1764	0.1764	0.1764	0.1764	0.2025	0.2633	0.2633	0.2633	0.2633	0.2633	0.2633	0.2633	0.2633	0.2633	0.2633	0.2633	0.2633	0.2633							0.0153	0.0153	0.0153	0.0153	0.0153	0.0153	0.0153	0.0153	0.0153	0.0153	0.0153	0.0153	0.0153	0.0153	0.0153	0.0153	0.0153	0.0153	0.0811	0.0811
YGR193C	PDX1	-0.0114	-0.0114	-0.0114	-0.0114			0.0109	0.0109	0.0109	0.0109	0.0109	0.0109	0.0109	0.0109	0.0109	0.0109	0.0109	0.0109	0.0109	0.0109	0.0109			-0.1884	-0.1884	-0.1884	-0.1884	-0.1884	-0.1884	-0.1884	-0.1884	-0.1884	-0.1884	-0.1884
YPR143W	RRP15	1.0487	1.0487	1.0487	1.0487	1.0487	1.0487	1.0487	1.0487	1.0487	1.0487	1.0487	1.0487	1.0487	1.0487																																	-0.3217	-0.3217
YKL189W	HYM1	-0.2728	-0.2728	-0.2728	-0.2728	-0.2728	-0.2728	-0.2728	-0.2728																								-0.0717	-0.0717	-0.0717	-0.0717	-0.0717	-0.0717	-0.0717	-0.0717	-0.0717	-0.0717
YOR252W	TMA16	0.3139	0.3139	0.3139	0.3139	0.3139	0.1961	0.0193	0.0193	0.0193	0.0193	0.0193	0.0193	0.0193	0.0193	0.0193	0.0193	0.0193	0.0193	0.0193			0.2884	0.2884	0.2884	0.2884	0.2884	0.2884	0.2884	0.2884	0.2884	0.2884	0.2884	0.2884	0.2884	0.2884	0.2884	0.2884	0.2884	0.2884	0.2884						0.2486	0.2486	0.2486
YJL143W	TIM17			-0.3706	-0.3706	-0.3706	-0.3706	-0.3706	-0.3706	-0.3706	-0.3706	-0.3706	-0.3706	-0.3706	-0.8293	-0.8293	-0.8293	-0.8293	-0.8293	-0.8293	-0.8293	-0.8293	-0.8293	-0.8293	-0.8293	-0.8293	-0.8293	-0.8293	-0.8293	-0.8293			0.0153	0.0153	0.0153	0.0153	0.0153	0.0153	0.0153	0.0153	0.0153	0.0153	0.0153	0.0153	0.0153	0.0153
YLR025W	SNF7	-0.0904	-0.0904	-0.0904	-0.0904			0.3475	0.3475	0.3475	0.3475	0.3475	0.3475	0.3475	0.3475	0.3475	0.3475	0.3475	0.3475	0.3475	0.3475	0.3475	0.3475		0.0475	0.0475	0.0475	0.0475	0.0475	0.0475	0.0475	0.0475	0.0475	0.0475	0.0475	0.0475	0.0475	0.0475
YGR194C	XKS1																		0.1377	0.1377	0.1377	0.1377	0.1377	0.1377	0.1377	0.1377	0.1377	0.1377	0.1377							-0.106	-0.106	-0.106	-0.106	-0.106	-0.106	-0.106	-0.106	-0.106	-0.106	-0.106	-0.106	-0.106	-0.106
YOL055C	THI20	-0.2699	-0.2699	-0.2699	-0.2699			-0.5176	-0.5176	-0.5176	-0.5176	-0.5176	-0.5176	-0.5176	-0.5176	-0.5176	-0.5176	-0.5176	-0.5176	-0.5176	-0.5176	-0.5176																				-0.5281	-0.5281	-0.5281	-0.5281	-0.5281	-0.5281	-0.5281	-0.5281
YOL158C	ENB1	-0.5717	-0.5717	-0.5717	-0.5717					-0.6284	-0.6284	-0.6284	-0.6284	-0.6284	-0.6284	-0.6284	-0.6284	-0.6284	-0.6284	-0.6284	-0.6284	-0.6284	-0.6284	-0.6284	-0.6284	-0.6284	-0.6284
YJL063C	MRPL8	-0.2353	-0.2353	-0.2353	-0.2353	-0.2353	-0.2353	-0.2353	-0.2353	-0.2353	-0.2353	-0.2353	-0.2353	-0.2353	-0.2353			-0.1725	-0.1725	-0.1725	-0.1725	-0.1725	-0.1725	-0.1725	-0.1725	-0.1725	-0.1725	-0.1725	-0.1725	-0.1725	-0.1725	-0.1725	-0.1725	-0.2227	-0.2728	-0.2728	-0.2728	-0.2728	-0.2728	-0.2728	-0.2728	-0.2728	-0.2728	-0.2728	-0.2728	-0.2728	-0.2728	-0.2728	-0.2728
YHR115C	DMA1	-0.1102	-0.1102	-0.1102	-0.1102	-0.6925	-0.6925	-0.6925	-0.6925	-0.6925	-0.6925	-0.6925	-0.6925	-0.6925	-0.6925	-0.6925	-0.6925	-0.1968	0.175	0.175	0.175	0.175	0.175	0.175	0.175	0.175	0.175	0.175	0.3851	0.5112	0.5112	0.5112	0.5112	0.5112	0.5112	0.5112	0.5112	0.5112
YLR136C	TIS11	-0.1647	-0.1647	-0.1647	-0.1647	-0.1647												-0.4888	-0.4888	-0.4888	-0.4888	-0.4888	-0.4888	-0.4888	-0.4888	-0.4888	-0.4888	-0.4888	-0.4888	-0.4888	-0.4888	-0.4888	-0.4888	-0.4888				-0.732	-0.732	-0.732	-0.732	-0.732	-0.732	-0.732	-0.732	-0.732	-0.732	-0.732	-0.732
YPL196W	OXR1																															-0.2603	-0.2603	-0.2603	-0.2603	-0.2603	-0.2603	-0.2603	-0.2603	-0.2603	-0.2603	-0.2603							0.0568
YAL030W	SNC1	0.3867	0.0616	0.0616	0.0616	0.0616	0.0616	0.0616	0.0616	0.0616	0.0616	0.0616	0.0616	0.0616	0.0616	0.0616	0.0616		0.0359	0.0359	0.0359	0.0359	0.0359	0.0359	0.0359	0.0359	0.0359	0.0359	0.0359	0.0359	0.0359	0.0359	0.0359	0.0359	0.0359	0.0359												-0.2842	-0.2842
YFR022W	ROG3	-0.1109	-0.5374	-0.5374	-0.5374	-0.5374	-0.5374	-0.5374	-0.5374	-0.5374	-0.5374	-0.5374	-0.5374	-0.5374	-0.5374	-0.5374	-0.5374	-0.7919	-0.7919	-0.7919	-0.7919	-0.7919	-0.7919	-0.7919	-0.7919	-0.7919	-0.7919	-0.7919	-0.7919	-0.7919	-0.7919	-0.7919											-0.4578	-0.4578	-0.4578	-0.4578	-0.4578	-0.4578	-0.4578
YNR049C	MSO1	-0.4042	-0.4042	-0.4042	-0.4042	-0.4042	-0.4042	-0.4042	-0.1849	0.3268	0.3268	0.3268	0.3268	0.3268	0.3268	0.3268	0.3268	0.3268	0.3268	0.3268	0.3268									-0.8363	-0.8363	-0.8363	-0.8363	-0.8363	-0.8363	-0.8363	-0.8363	-0.8363	-0.8363	-0.8363	-0.8363	-0.8363	-0.8363	-0.8363	-0.8363	-0.8363	-0.8363	-0.8363
YMR150C	IMP1	0.62	0.62	0.62	0.075	-0.0159	-0.0159	-0.0159	-0.0159	-0.0159	-0.0159	-0.0159	-0.0159	-0.0159	-0.0159	-0.0159	-0.0159	-0.0159	-0.0159	-0.0159	-0.0159	0.2758	0.4008	0.4008	0.4008	0.4008	0.4008	0.4008	0.4008	0.4008	0.4008	0.4008	0.4008												0.3982	0.3982	0.3982	0.3982	0.3982
YLR180W	SAM1	-0.8265	-0.8265	-0.8265	-0.8265	-0.8265	-0.8265	-0.8265	-0.8265			-0.5441	-0.5441	-0.5441	-0.5441	-0.5441	-0.5441	-0.5441	-0.5441	-0.5441	-0.5441	-0.5441
YDL142C	CRD1	0.3615	0.3615	0.3615	0.3615	0.3615	0.3615	0.3615	0.3615	0.3615	0.0518	0.0518	0.0518	0.0518	0.0518	0.0518	0.0518	0.0518	0.0518	0.0518	0.0518	0.0518	0.0518	0.0518	0.0518	0.0518			-0.1719	-0.1719	-0.1719	-0.1719	-0.1719	-0.1719	-0.1719	-0.1719	-0.1719	-0.1719	-0.1719	-0.129	-0.129	-0.129	-0.129	-0.129	-0.129	-0.129	-0.129	-0.129	-0.129
YDR255C	RMD5	0.1736	0.1736	0.1736	0.1736	0.1736	0.1736	0.1736	0.1736	-0.0461	-0.2658	-0.2658	-0.2658	-0.2658	-0.2658	-0.2658	-0.2658	-0.2658	-0.2658	-0.2334	0.0586	0.0586	0.0586	0.0586	0.0586	0.0586	0.0586	0.0586	0.0586	0.0586
YJR047C	ANB1																																								-0.6909	-0.6909	-0.6909	-0.6909	-0.6909	-0.6909	-0.6909	-0.6909	-0.6909
YDL197C	ASF2	0.1564	0.1564	0.1564	0.1564	0.1564	0.1564	0.1564	0.1564	0.1564	0.1564	0.1564	0.1564	0.1564	0.1564	0.1564	0.1564	0.1564	0.3039	0.3039	0.3039	0.3039	0.3039	0.3039	0.3039	0.3039	0.3039	0.3039	0.3039	0.3039	0.3039	0.3039	0.3039																0.4636
YDR424C	DYN2	0.557	0.557							0.4087	0.4087	0.4087	0.4087	0.4087	0.4087	0.4087	0.4087	0.4087	0.4087	0.4087	0.4087	0.4087	0.4087	0.4087	0.4087			0.4902	0.4902	0.4902	0.4902	0.4902	0.4902	0.4902	0.4902	0.4902	0.4902	0.4902	0.4902										0.1219
YMR318C	ADH6	0.3157																0.2019	0.2019	0.2019	0.2019	0.2019	0.2019	0.2019	0.2019	0.2019	0.2019	0.2019	0.2019	0.2019	0.2019	0.2019	0.2019	-0.3623	-0.3623	-0.3623	-0.3623	-0.3623	-0.3623	-0.3623	-0.3623	-0.3623	-0.3623	-0.3623
YBR188C	NTC20										-0.2546	-0.2546	-0.2546	-0.2546	-0.2546	-0.2546	-0.2546	-0.2546	-0.2546	-0.2546	-0.2546	-0.2546	-0.2546	-0.2546																							0.2723	0.2723	0.2723
YNL194C		-0.5578	-0.5578	-0.5578	-0.5578	-0.5578	-0.5578	-0.5578	-0.5578	-0.5578	-0.5578	-0.5578	-0.5578	-0.3573	-0.3573	-0.3573	-0.3573	-0.3573	-0.3573	-0.3573	-0.3573	-0.3573	-0.3573	0.1355	0.1355	0.1355	0.1355	0.1355	0.1355	0.1355	0.1355	0.1355	0.1355	0.1355	0.1355	0.1355	0.1355	0.1355	0.1355	0.1355	0.1355						-0.2692	-0.2692	-0.2692
YMR208W	ERG12	0.1033	0.1033	0.1033	0.1033	0.1033	0.1033	0.1033	0.1033	0.1033	0.1033	0.1033	0.1033	0.1033	0.1033									-0.2603	-0.2603	-0.2603	-0.2603	-0.2603	-0.2603	-0.2603	-0.2603	-0.2603	-0.2603	-0.2603	-0.2603	-0.2603	0.0178	0.0178	0.0178	0.0178	0.0178	0.0178	0.0178	0.0178	0.0178	0.0178	0.0106	-0.0546	-0.0546
YBR056W		0.2693	0.2693					-1.2832	-1.2832	-1.2832	-1.2832	-1.2832	-1.2832	-1.2832	-1.2832	-1.2832	-1.2832	-1.2832	-1.2832	-1.2832	-1.2832	-1.2832	-1.2832	-1.2832	-1.2832																			0.7938	0.7938	0.7938	0.7938	0.7938	0.7938
YOR091W	TMA46	0.1637	0.1637	0.1637	0.1637	0.1637	0.1637	0.1637	0.1637	0.1637	0.1746	0.2723	0.2723	0.2723	0.2723	0.2723	0.2723	0.2723	0.2723	0.2723	0.1266	0.0683	0.0683	0.0683	0.0683	0.0683	0.0683	0.0683	0.0683	0.0683	0.0683	0.0683
YLR249W	YEF3
YPL119C	DBP1					0.3048	0.3048	0.3048	0.3048	0.3048	0.3048	0.3048	0.3048	0.3048	0.3048	0.3048	0.3457	0.3457	0.3457	0.3457	0.3457	0.3457	0.3457	0.3457	0.3457	0.3457	0.3457	0.3457	0.3457	0.3457	0.3457	0.3457	0.3457	0.3457	0.3457
YOR111W		-0.3217	-0.3217	-0.3217	-0.3217	-0.3217	-0.3217	-0.3217	-0.3217	-0.3217	-0.3217	-0.3217	-0.3217	0.1273	0.1273	0.1273	0.1273	0.1273	0.1273	0.1273	0.1273	0.1273	0.1273	0.1273	0.1273	0.1273	0.1273	0.1273	0.1273				0.1172	0.1172	0.1172	0.1172	0.1172	0.1172	0.1172	0.1172	0.1172	0.1172	0.1172					0.2633	0.2633
YKR048C	NAP1	0.0273	0.4062	0.4062	0.4062	0.4062	0.4062	0.4062	0.4062	0.4062	0.4062	0.4062	0.4062	0.4062	0.4062	0.4062	0.4062	0.4062	0.4062	0.2608	0.1154	0.1154	0.1154	0.1154	0.1154	0.1154	0.1154	0.1154	0.1154	0.1154	0.1154	0.1154	0.1154	0.1154	0.1154	0.1154	0.1154											0.3855	0.3855
YDL120W	YFH1	-0.5775	-0.5775	-0.5775	-0.5775	-0.5775	-0.5775							-0.6298	-0.6298	-0.6298	-0.6298	-0.6298	-0.6298	-0.6298	-0.6298	-0.6298	-0.6298	-0.6298	-0.6298	-0.6298	-0.6298	-0.6298	-0.6298	-0.6298	-0.6298	-0.6298																	0.2633
YAL049C		0.3274	0.3274			-0.066	-0.066	-0.066	-0.066	-0.066	-0.066	-0.066	-0.066	-0.066	-0.066	-0.066	-0.066	-0.066	-0.1594	-0.1594	-0.1594	-0.1594	-0.1594	-0.1594	-0.1594	-0.1594	-0.1594	-0.1594	-0.1594	-0.1594	-0.1594	-0.1594	-0.1594	-0.1594	-0.1594									-0.3648	-0.3648	-0.3648	-0.3648	-0.3648	-0.3648
YGL125W	MET13																																																-0.2793
YGL196W	DSD1	-0.3831	-0.3831	-0.3831	-0.3831	-0.3831	-0.3831	-0.3831	-0.3831	-0.3831	-0.3831	-0.3831	-0.4095	-0.4711	-0.4711	-0.4711	-0.4711	-0.4711	-0.4711	-0.4711	-0.4711	-0.4711	-0.4711	-0.4711				-0.5847	-0.5847	-0.5847	-0.5847	-0.5847	-0.5847	-0.5847	-0.5847	-0.5847	-0.5847	-0.5847	-0.5847		-1.0221	-1.0221	-1.0221	-1.0221	-1.0221	-1.0221	-1.0221	-1.0221	-1.0221
YOR301W	RAX1	-0.0693	-0.0693	-0.0693	-0.0693	-0.0693	-0.0693	-0.0693						-0.2024	-0.2024	-0.2024	-0.2024	-0.2024	-0.2024	-0.2024	-0.2024	-0.2024	-0.2024	-0.2024			0.1731	0.1731	0.1731	0.1731	0.1731	0.1731	0.1731	0.1731	0.1731	0.1731	0.1731	0.1731	0.1731	0.1731	0.1731	0.1731	0.1731	0.1731	0.1711	0.1612	0.1612	0.1612	0.1612
YGR074W	SMD1	-0.2885	-0.2885	-0.2885	-0.2885	-0.2885	-0.2885	-0.2885									0.2545	0.2545	0.2545	0.2545	0.2545	0.2545	0.2545	0.2545	0.2545	0.2545	0.2545	0.2545	0.2545	0.2545	0.2545																-0.3217	-0.3217	-0.3217
YBR101C	FES1	-0.0487	-0.0487	-0.0487	-0.0487	-0.0487	-0.0487	-0.0487	-0.0487	-0.0487	-0.0487	-0.0487	-0.265	-0.4092	-0.4092	-0.4092	-0.4092	-0.4092	-0.4092	-0.4092	-0.4092	-0.4092	-0.4092	-0.4092	-0.4092	-0.8742	-0.8742	-0.8742	-0.8742	-0.8742	-0.8742	-0.8742	-0.8742	-0.8742	-0.8742	-0.8742
YDR084C	TVP23	-0.2662	-0.2662	-0.2662			-0.8298	-0.8298	-0.8298	-0.8298	-0.8298	-0.8298	-0.8298	-0.8298	-0.8298	-0.8298	-0.8298	-0.8298	-0.8298	-0.8298	-0.8298	-0.8298	-0.8298	-0.8298														-0.1353	-0.1353	-0.1353	-0.1353	-0.1353	-0.1353	-0.1353	-0.1353	-0.1353	-0.1353	-0.1353	-0.1353
YHR112C		-0.0686	-0.0686	-0.0686			-0.1076	-0.1076	-0.1076	-0.1076	-0.1076	-0.1076	-0.1076	-0.1076	-0.1076	-0.1076	-0.1076	-0.1076	-0.1076	-0.1076	-0.1076	-0.1076	-0.1076	-0.1076	0.1564	0.1564	0.1564	0.1564	0.1564	0.1564	0.1564	0.1564	0.1564	0.1564	0.1564	0.1564	0.1564	0.1564	0.1564	0.1564
YGR091W	PRP31	-1.0904								-0.6055	-0.6055	-0.6055	-0.6055	-0.6055	-0.6055	-0.6055	-0.6055	-0.6055	-0.6055	-0.6055	-0.6055	-0.6055	-0.6055		0.0153	0.0153	0.0153	0.0153	0.0153	0.0153	0.0153	0.0153	0.0153	0.0153													-0.2699	-0.2699	-0.2699
YCL028W	RNQ1	0.1929	0.1929	0.1929	0.1929	0.1929	0.1929	0.1929		0.8135	0.8135	0.8135	0.8135	0.8135	0.8135	0.8135	0.8135	0.8135	0.8135	0.8135	0.8135	0.8135	0.8135	0.8135	0.8135	0.8135	0.8135	0.5274	0.3367	0.3367	0.3367	0.3367	0.3367	0.3367	0.3367	0.3367	0.3367	0.3367	0.3367	0.3367	0.3367	0.3367	0.3367	0.3367
YGR142W	BTN2				-0.439	-0.439	-0.439	-0.439	-0.439	-0.439	-0.439	-0.439	-0.439	-0.439	-0.439	-0.439	-0.439	-0.439	-0.439	-0.439	-0.439	-0.439	-0.439																				-0.1518	-0.1518	-0.1518	-0.1518	-0.1518	-0.1518	-0.1518
YNL195C		-0.0191	-0.0191	-0.0191	-0.0191	-0.0191	-0.0191	-0.0191	-0.0191	0.3023	0.3023	0.3023	0.3023	0.3023	0.3023	0.3023	0.3023	0.3023	0.3023	-0.0126	-0.0755	-0.0755	-0.0755	-0.0755	-0.0755	-0.0755	-0.0755	-0.0755	-0.0755	-0.0755	-0.0755
YDR064W	RPS13	-0.0634	-0.0634		0.0444	0.0444	0.0444	0.0444	0.0444	0.0444	0.0444	0.0444	0.0444	0.0444	0.0444	0.0444	0.0444	0.0444	0.0444
YBR082C	UBC4			-1.0922	-1.0922	-1.0922	-1.0922	-1.0922	-1.0922	-1.0922	-1.0922	-1.0922	-1.0922	-1.0922							-0.6436	-0.6436	-0.6436	-0.6436	-0.6436	-0.6436	-0.6436	-0.6436	-0.6436	-0.6436	-0.6436
YOR034C	AKR2	-0.7781	-0.7781	-0.7781	-0.7781	-0.7781	-0.7781	-0.7781	-0.7781	-0.7781	-0.7781	-0.7781	-0.7781	-0.7781						-0.0587	-0.0587	-0.0587	-0.0587	-0.0587	-0.0587	-0.0587	-0.0587	-0.0587	-0.0587	-0.0587																			-0.8363
YKL098W	MTC2	0.5353	0.5353	0.5353	0.5353	0.5353	0.3989	0.3716	0.3716	0.3716	0.3716	0.3716	0.3716	0.3716	0.3716	0.3716	0.3716		0.1077	0.1077	0.1077	0.1077	0.1077	0.1077	0.1077	0.1077	0.1077	0.1077	0.1077	0.1077	0.1077	0.1077	0.1077	0.1077														0.2633	0.2633
YMR178W		0.2126	0.2126	0.2126	0.2126	0.2126	0.2126	0.2126	0.2126	0.2126	0.2126	0.2126	0.2126	0.2126	0.2126	0.2126	0.2126	0.2126	0.144	0.144	0.144	0.144	0.144	0.144	0.144	0.144	0.144	0.144	0.144	0.144	0.144	0.144
YDR178W	SDH4	0.0871	0.0871	0.0871	0.1731	0.1731	0.1731	0.1731	0.1731	0.1731	0.1731	0.1731	0.1731	0.1731	0.1731	0.1731	0.1731	0.1731	0.1731	0.1731						-0.6187	-0.6187	-0.6187	-0.6187	-0.6187	-0.6187	-0.6187	-0.6187	-0.6187	-0.6187	-0.6187										0.0031	0.0031	0.0031	0.0031
YLR107W	REX3	0.1758	0.1758	0.1758	0.1758	0.1758	0.1758	0.1758	0.1758	0.1758	0.1758	0.1758					0.0298	0.0298	0.0298	0.0298	0.0298	0.0298	0.0298	0.0298	0.0298	0.0298	0.0298	0.0298	0.0298
YPL162C																						-0.6716	-0.6716	-0.6716	-0.6716	-0.6716	-0.6716	-0.6716	-0.6716	-0.6716	-0.6716	-0.6716	-0.6716	-0.6716				-0.8692	-0.8692	-0.8692	-0.8692	-0.8692	-0.8692	-0.8692	-0.8692	-0.8692	-0.8692	-0.8692	-0.8692
YGL146C		0.1929	0.1929	0.1929	0.1929	0.1929																																	-0.2877	-0.2877	-0.2877	-0.2877	-0.2877	-0.2877	-0.2877	-0.2877	-0.2877	-0.2877	-0.2877
YPL229W		-0.2392																	-0.7323	-0.7323	-0.7323	-0.7323	-0.7323	-0.7323	-0.7323	-0.7323	-0.7323	-0.7323	-0.7323	-0.7323	-0.7323	-0.7323	-0.7323	-0.7323	-0.7323	-0.7323
YIR034C	LYS1	-0.671	-0.671	-0.671	-0.671	-0.671	-0.671									0.2683	0.2683	0.2683	0.2683	0.2683	0.2683	0.2683	0.2683	0.2683	0.2683	0.2683	0.2683	0.2683	0.2683	0.2683	0.2683	0.2683	0.2683	0.2683					0.2633	0.2633	0.2633	0.2633	0.2633	0.2633	0.2633	0.2633	0.2633	0.2633	0.2633
YMR016C	SOK2																																	-1.5374	-1.5374	-1.5374	-1.5374	-1.5374	-1.5374	-1.5374	-1.5374	-1.5374	-1.5374	-1.5374	-1.5374	-1.5374	-1.5374	-1.5374	-1.5374
YHR193C	EGD2	0.5137	0.5137	0.5137	0.5137	0.5137	0.5137	0.5137	-0.0469	-0.1091	-0.1091	-0.1091	-0.1091	-0.1091	-0.1091	-0.1091	-0.1091	-0.1091	-0.521	-0.521	-0.521	-0.521	-0.521	-0.521	-0.521	-0.521	-0.521	-0.521
YDL236W	PHO13	-0.3195	-0.2437	-0.2437	-0.2437	-0.2437	-0.2437	-0.2437	-0.2437	-0.2437	-0.2437	-0.2437	-0.2437				0.6783	0.6783	0.6783	0.6783	0.6783	0.6783	0.6783	0.6783	0.6783	0.6783	0.6783	0.6783	0.6783	0.6783	0.6783	0.6783	0.6783	0.6783														-0.3217	-0.3217
YOR357C	SNX3	-0.3015	-0.3015	-0.3015	-0.3015	-0.3015	-0.3015	-0.3015	-0.3015	-0.3015	-0.3015	-0.3015	-0.3015	-0.3015	-0.3015	-0.3015	-0.3015	-0.3015	-0.3015	-0.3015				-0.5627	-0.5627	-0.5627	-0.5627	-0.5627	-0.5627	-0.5627	-0.5627	-0.5627	-0.5627	-0.5627	-0.5627	-0.5627	-0.5627	-0.5627	-0.5627	-0.5627
YLR146C	SPE4	0.2338	0.2338	0.2338	0.2338	0.2338	0.2338	0.2338	0.2338		0.6783	0.6783	0.6783	0.6783	0.6783	0.6783	0.6783	0.6783	0.6783	0.6783								0.3392	0.3392	0.3392	0.3392	0.3392	0.3392	0.3392	0.3392	0.3392	0.3392	0.3392	0.3392	0.3392	0.3392	0.3392	0.3392	0.3392
YGR195W	SKI6																												-0.3217	-0.3217	-0.3217	-0.3217	-0.3217	-0.3217	-0.3217	-0.3217	-0.3217	-0.3217							0.4373	0.4373	0.4373	0.4373	0.4373
YLR412W	BER1	0.0298	-0.1546	-0.1546	-0.1546	-0.1546	-0.1546	-0.1546	-0.1546	-0.1546	-0.1546	-0.1546	-0.1546	-0.1546	-0.1546	-0.1546											-1.4916	-1.4916	-1.4916	-1.4916	-1.4916	-1.4916	-1.4916	-1.4916	-1.4916	-1.4916		0.4153	0.4153	0.4153	0.4153	0.4153	0.4153	0.4153	0.4153	0.4153	0.341	-0.253	-0.253
YOL053W		-0.7323	-0.7323	-0.7323	-0.7323	-0.7323	-0.7323			-0.3349	-0.3349	-0.3349	-0.3349	-0.3349	-0.3349	-0.3349	-0.3349	-0.3349	-0.3349	-0.3349	-0.3349	-0.3349																		0.2633	0.2633	0.2633	0.2633	0.2633	0.2633	0.2633	0.2633	0.2633	0.2633
YKL119C	VPH2	0.0002	0.0002	0.0002	0.0002	0.0002	0.0002	0.0002	0.0002			0.972	0.972	0.972	0.972	0.972	0.972	0.972	0.972	0.972	0.972	0.972	0.972	0.972	0.972	0.1189	0.1189	0.1189	0.1189	0.1189	0.1189	0.1189	0.1189	0.1189	0.1189	0.1189	0.1189									-0.3783	-0.3783	-0.3783	-0.3783
YLR220W	CCC1	-0.48	-0.48	-0.48	-0.48	-0.48	-0.48	-0.48	-0.48	-0.48	-0.48	-0.48	-0.48	-0.48	-0.48	-0.0793	-0.0348	-0.0348	-0.0348	-0.0348	-0.0348	-0.0348	-0.0348	-0.0348	-0.0348	-0.0348	-0.0348	-0.0348	-0.0348	-0.0348	-0.0348	-0.0348	-0.0348
YOL038C-A			0.4954	0.4954	0.4954	0.4954	0.4954	0.4954	0.4954	0.4954	0.4954	0.4954	0.4954	0.4954	0.4954	0.4954			0.1393	0.1393	0.1393	0.1393	0.1393	0.1393	0.1393	0.1393	0.1393	0.1393	0.1393	0.1393	0.1393	0.1393	0.1393	0.1393	0.1393										-0.578	-0.578	-0.578	-0.578	-0.578
YDR510W	SMT3
YGR214W	RPS0A
YOR016C	ERP4						0.4684	0.4684	0.4684	0.4684	0.4684	0.4684	0.4684	0.4684	0.4684	0.4684	0.4684	0.4684	0.4684	0.4684	0.4684	0.4684	0.4684	0.5658	0.5658	0.5658	0.5658	0.5658	0.5658	0.5658	0.5658	0.5658	0.5658	0.5658	0.5658	0.5658	0.5658	0.5658	0.5658
YBL064C	PRX1	0.1399	0.1399	0.1399	0.1399	0.1399	0.1399	0.1399	0.1399	0.1399	0.1399	0.1399	0.1399	0.1399	0.1399	0.1399	0.2924	0.2924	0.2924	0.2924	0.2924	0.2924	0.2924	0.2924	0.2924	0.2924	0.2924
YPR166C	MRP2	0.1579							-0.2148	-0.2148	-0.2148	-0.2148	-0.2148	-0.2148	-0.2148	-0.2148	-0.2148	-0.2148			-0.503	-0.503	-0.503	-0.503	-0.503	-0.503	-0.503	-0.503	-0.503	-0.503	-0.503	-0.503	-0.503	-0.503	-0.503	-0.503	-0.503
YDR410C	STE14	-0.1732	-0.1732	-0.0385	-0.0385	-0.0385	-0.0385	-0.0385	-0.0385	-0.0385	-0.0385	-0.0385	-0.0385	-0.0385	-0.0385	-0.0385	-0.0385	-0.0385	-0.195	-0.4296	-0.4296	-0.4296	-0.4296	-0.4296	-0.4296	-0.4296	-0.4296	-0.4296	-0.4296	-0.4296	-0.4296	-0.4296	-0.4296
YGR033C	TIM21																																															-0.4626	-0.4626
YBR285W		-0.0168	-0.0168	-0.0168	-0.0168	-0.0311	-0.1594	-0.1594	-0.1594	-0.1594	-0.1594	-0.1594	-0.1594	-0.1594	-0.1594	-0.1594	0.157	0.157	0.157	0.157	0.157	0.157	0.157	0.157	0.157	0.157	0.157		-0.3742	-0.3742	-0.3742	-0.3742	-0.3742	-0.3742	-0.3742	-0.3742	-0.3742	-0.3742	-0.3742	-0.3742
YHL040C	ARN1	-0.2021	-0.2021	-0.2021	-0.2021	-0.2021	-0.2021	-0.2021	-0.2021	-0.2021	-0.2021	-0.2021	-0.2021	-0.2021	-0.2021	-0.2021	-0.2021			0.2172	0.2172	0.2172	0.2172	0.2172	0.2172	0.2172	0.2172	0.2172	0.2172	0.2172	0.2172	0.2172							-0.0922	-0.0922	-0.0922	-0.0922	-0.0922	-0.0922	-0.0922	-0.0922	-0.0922	-0.0463	-0.0348
YML098W	TAF13	0.2913	0.2913	0.2913	0.2913	0.2913	0.2913	0.2913	0.2913	0.2913	0.2913	0.2913	0.2913	0.2913	0.2913			0.0409	0.0409	0.0409	0.0409	0.0409	0.0409	0.0409	0.0409	0.0409	0.0409	0.0409	0.0409	0.0409	0.0409	0.0409	0.0409
YDL052C	SLC1	-0.3217	-0.3217	-0.3217	-0.3217	-0.3217	-0.3217	-0.2265	-0.2265	-0.2265	-0.2265	-0.2265	-0.2265	-0.2265	-0.2265	-0.2265	-0.2265	-0.2265	-0.2265	-0.2265	-0.2265	-0.2265
YOR003W	YSP3	-0.2616	-0.2616	-0.2616	-0.2616	-0.2616	-0.2616	-0.2616							0.113	0.113	0.113	0.113	0.113	0.113	0.113	0.113	0.113	0.113	0.113	0.113	0.113	-0.2616	-0.2616	-0.2616	-0.2616	-0.2616	-0.2616	-0.2616	-0.2616	-0.2616	-0.2616	-0.2616	-0.2616	-0.2616	-0.2616	-0.2616	-0.2616	-0.2616	-0.7117	-0.8242	-0.8242	-0.8242	-0.8242
YDR210W		-0.4372	-0.4372																								-0.7154	-0.7154	-0.7154	-0.7154	-0.7154	-0.7154	-0.7154	-0.7154	-0.7154	-0.7154	-0.7154	-0.7154	-0.7154	-0.7154	-0.7154	0.1219	0.1219	0.1219	0.1219	0.1219	0.1219	0.1219	0.1219
YGL035C	MIG1	-1.0587	-1.0587	-1.0587	-1.0587	-1.0587	-1.0587	-1.0587	-1.0587	-1.0587		-0.5754	-0.5754	-0.5754	-0.5754	-0.5754	-0.5754	-0.5754	-0.5754	-0.5754	-0.5754
YBL107C		0.1997	0.1997	0.1997	0.1997			-0.1091	-0.1091	-0.1091	-0.1091	-0.1091	-0.1091	-0.1091	-0.1091	-0.1091	-0.1091	-0.1091	-0.1091	-0.1091	-0.1091	-0.1091	-0.1091	-0.1091	-0.8023	-0.8023	-0.8023	-0.8023	-0.8023	-0.8023	-0.8023	-0.8023	-0.8023	-0.8023	-0.8023	-0.8023
YDR539W							-0.3217	-0.3217	-0.3217	-0.3217	-0.3217	-0.3217	-0.3217	-0.3217	-0.3217	-0.3217	-0.3217						-0.6792	-0.6792	-0.6792	-0.6792	-0.6792	-0.6792	-0.6792	-0.6792	-0.6792	-0.6792	-0.6792				-0.5023	-0.5023	-0.5023	-0.5023	-0.5023	-0.5023	-0.5023	-0.5023	-0.5023	-0.5023	-0.5023	-0.5023
YDR079W	PET100	-0.4128	-0.4128	-0.4128	-0.4128				-0.3806	-0.3806	-0.3806	-0.3806	-0.3806	-0.3806	-0.3806	-0.3806	-0.3806	-0.3806	-0.3806	-0.3806	-0.3806	-0.3806	-0.3806	-0.3806	-0.015	-0.015	-0.015	-0.015	-0.015	-0.015	-0.015	-0.015	-0.015	-0.015	-0.015	-0.015	-0.015	-0.015	-0.015	-0.015	-0.015	-0.015
YDR085C	AFR1																			-0.5399	-0.5399	-0.5399	-0.5399	-0.5399	-0.5399	-0.5399	-0.5399	-0.5399	-0.5399	-0.5399	-0.5399	-0.5399	-0.338	0.1329	0.1329	0.1329	0.1329	0.1329	0.1329	0.1329	0.1329	0.1329	0.1329		-0.5441	-0.5441	-0.5441	-0.5441	-0.5441
YOL123W	HRP1		-0.7754	-0.7754	-0.7754	-0.7754	-0.7754	-0.7754	-0.7754	-0.7754	-0.7754	-0.7754	-0.7754	-0.7754	0.0095	0.0095	0.0095	0.0095	0.0095	0.0095	0.0095	0.0095	0.0095	0.0095	0.0095	0.0095	0.0095	0.0095	0.0095	0.0095
YPR153W		-0.1827	-0.1827	-0.1827	-0.1827	-0.1827	-0.1827	-0.1827	-0.1827				0.3344	0.3344	0.3344	0.3344	0.3344	0.3344	0.3344	0.3344	0.3344	0.3344	0.3344	0.3344	0.3344	0.3344	0.0117	0.0117	0.0117	0.0117	0.0117	0.0117	0.0117	0.0117	0.0117	0.0117	0.0117										-0.1939	-0.1939	-0.1939
YNL312W	RFA2	0.5757	0.5757	0.5757	0.5757	0.5757	0.5757	0.5757	0.5757	0.5757	0.5757	0.5757	0.5757	0.5757	0.5757	0.5757	0.4323	0.3749	0.3749	0.3749	0.3749	0.3749	0.3749	0.3749	0.3749	0.3749	0.3749	0.3749	0.3749	0.3749	0.3749	0.3749	0.3749														0.0933	0.0933	0.0933
YLR185W	RPL37A		0.2633	0.2633	0.2633	0.2633	0.2633	0.2633	0.2633	0.2633	0.2633	0.2633
YGR250C		-0.3997	-0.3997	-0.3997	-0.3997	-0.3997	-0.3997				-1.193	-1.193	-1.193	-1.193	-1.193	-1.193	-1.193	-1.193	-1.193	-1.193	-1.193	-1.193	-1.193	-1.193	-1.193	-1.193	-1.193							-0.6436	-0.6436	-0.6436	-0.6436	-0.6436	-0.6436	-0.6436	-0.6436	-0.6436	-0.6436	-0.6436	-0.6436
YOL146W	PSF3					0.0171	0.0171	0.0171	0.0171	0.0171	0.0171	0.0171	0.0171	0.0171	0.0171	0.0171	0.0171	0.0171	0.0171	0.0153	0.0117	0.0117	0.0117	0.0117	0.0117	0.0117	0.0117	0.0117	0.0117	0.1385	0.1702	0.1702	0.1702	0.1702	0.1702	0.1702	0.1702	0.1702		-0.5143	-0.5143	-0.5143	-0.5143	-0.5143	-0.5143	-0.5143	-0.5143	-0.5143	-0.5143
YOL133W	HRT1	-0.6722	-0.5669	0.3806	0.3806	0.3806	0.3806	0.3806	0.3806	0.3806	0.3806	0.3806	0.3806	0.3806	0.3806	0.3806	0.3806	-0.2107	-0.2107	-0.2107	-0.2107	-0.2107	-0.2107	-0.2107	-0.2107	-0.2107	-0.2107	-0.2107																				-0.3217	-0.3217
YNL232W	CSL4		-0.9788	-0.9788	-0.9788	-0.9788	-0.9788	-0.9788	-0.9788	-0.9788	-0.9788	-0.9788	-0.9788	-0.9788	-0.9788	-0.9788	-0.7692	-0.7692	-0.7692	-0.7692	-0.7692	-0.7692	-0.7692	-0.7692	-0.7692	-0.7692	-0.7692
YLR306W	UBC12	0.5396	0.5396	0.5396	0.5754	0.6112	0.6112	0.6112	0.6112	0.6112	0.6112	0.6112	0.6112	0.6112	0.6112	0.6112					0.3497	0.3497	0.3497	0.3497	0.3497	0.3497	0.3497	0.3497	0.3497	0.3497	0.3497	0.3497	0.3497	0.3497	0.3497	0.3497	0.3497	0.3497	0.3497					0.1758	0.1758	0.1758	0.1758	0.1758	0.1758
YPR118W	MRI1							0.4767	0.4767	0.4767	0.4767	0.4767	0.4767	0.4767	0.4767	0.4767	0.4767	0.4767	0.4767	0.4767	0.4767			-0.6561	-0.6561	-0.6561	-0.6561	-0.6561	-0.6561	-0.6561	-0.6561	-0.6561	-0.6561	-0.6561	-0.6561
YDR298C	ATP5												-0.5061	-0.5061	-0.5061	-0.5061	-0.5061	-0.5061	-0.5061	-0.5061	-0.5061	-0.5061	-0.5061	-0.5061	-0.3472	-0.3472	-0.3472	-0.3472	-0.3472	-0.3472	-0.3472	-0.3472	-0.3472	-0.3472	-0.3472	-0.3472	-0.3472	-0.3472	-0.3472	-0.3472	-0.3472	-0.3472
YML004C	GLO1	-0.8363	-0.8363	-0.8363	-0.8363	-0.8363	-0.8363		-0.71	-0.71	-0.71	-0.71	-0.71	-0.71	-0.71	-0.71	-0.71	-0.71	-0.71	-0.71	-0.71	-0.71	-0.71					-0.5265	-0.5265	-0.5265	-0.5265	-0.5265	-0.5265	-0.5265	-0.5265	-0.5265	-0.5265	-0.5265	-0.5265	-0.5265							-0.2546	-0.2546	-0.2546
YLR420W	URA4	-0.8287	-0.8287	-0.8287	-0.8287	-0.8287	-0.8287				-0.6543	-0.6543	-0.6543	-0.6543	-0.6543	-0.6543	-0.6543	-0.6543	-0.6543	-0.6543	-0.6543	-0.6561	-0.6561	-0.6561	-0.6561	-0.6561	-0.6561	-0.6561	-0.6561	-0.6561	-0.6561	-0.6561	-0.6561	-0.6561	-0.6561	-0.6561	-0.6561	-0.6561	-0.6561	-0.6561
YOR317W	FAA1	-1.3217	-1.3217	-1.3217	-1.3217	-1.3217	-1.3217	-1.3217	-1.3217	-0.6839	-0.0461	-0.0461	-0.0461	-0.0461	-0.0461	-0.0461	-0.0461	-0.0461	-0.0461	-0.0461	-0.0461	-0.0461	-0.0461
YIL127C		0.3709	0.3709	0.3709	0.3709	0.3709	0.3709	0.3709	0.3709	0.3709	0.3709	0.3709	0.1647	0.0764	0.0764	0.0764	0.0764	0.0764	0.0764	0.0764	0.0764	0.0764	0.0764	0.0764	0.0764	0.0764	0.0764	0.0764																					0.0963
YOL144W	NOP8	0.3945	0.3945	0.3945	0.3945	0.3945	0.3945	0.3945	0.3945	0.3945	0.3945	0.3945	0.3945	0.3945	0.3945	0.3945	0.3945	0.3551	0.3157	0.3157	0.3157	0.3157	0.3157	0.3157	0.3157	0.3157	0.3157	0.3157	0.3157	0.3157	0.3157	0.3157
YKR059W	TIF1				-0.3527	-0.3527	-0.3527	-0.3527	-0.3527	-0.3527	-0.3527	-0.3527	-0.3527	-0.3527	-0.3527	-0.3527	-0.3527	-0.3527	-0.3527	-0.3527	-0.3527	-0.6851	-0.9067	-0.9067	-0.9067	-0.9067	-0.9067	-0.9067	-0.9067	-0.9067	-0.9067	-0.9067	-0.9067	-0.9067	-0.9067	-0.9067
YBL006C	LDB7				0.5263	0.5263	0.5263	0.5263	0.5263	0.5263	0.5263	0.5263	0.5263	0.5263	0.5263						0.2126	0.2126	0.2126	0.2126	0.2126	0.2126	0.2126	0.2126	0.2126	0.2126	0.2126	0.2126							0.4268	0.4268	0.4268	0.4268	0.4268	0.4268	0.4268	0.4268	0.4268	0.4268	0.4268
YLR243W		-0.3217	-0.3217	-0.3217	-0.3217	-0.3217	-0.3217	-0.3217	-0.3217	-0.3217	-0.3217	-0.3217	-0.3217	-0.3217	-0.3217	-0.3217	-0.3217	-0.3217	0.285	0.285	0.285	0.285	0.285	0.285	0.285	0.285	0.285	0.285	0.285	0.285	0.2026	0.2026	0.2026	0.2026	0.2026	0.2026	0.2026	0.2026	0.2026	0.2026	0.2026	0.2026	0.2026	0.2026	0.2026	0.2026	0.2026	0.2026
YBR264C	YPT10	0.0763	0.0763	0.0763	0.0763	0.0763	0.0763	0.0168	0.0168	0.0168	0.0168	0.0168	0.0168	0.0168	0.0168	0.0168	0.0168	0.0168	0.0168	0.0168	0.0168	0.0168	0.0168	0.0168	-0.2937	-0.2937	-0.2937	-0.2937	-0.2937	-0.2937	-0.2937	-0.2937	-0.2937	-0.2937	-0.2937
YLL033W	IRC19		0.7115	0.7115	0.7115	0.7115	0.7115	0.7115	0.7115	0.7115	0.7115	0.7115	0.7115	0.7115	0.7115	0.7115	0.7115	0.7115	0.7115	0.4739	0.4739	0.4739	0.4739	0.4739	0.4739	0.4739	0.4739	0.4739	0.4739	0.4739	0.4739	0.4739	0.4739	0.4739	0.4739	0.4739										-0.7754	-0.7754	-0.7754	-0.7754
YDR378C	LSM6	-0.1238	-0.1238	-0.1238	-0.1238	-0.1238	-0.1238		-0.0416	-0.0416	-0.0416	-0.0416	-0.0416	-0.0416	-0.0416	-0.0416	-0.0416	-0.0416							-0.9067	-0.9067	-0.9067	-0.9067	-0.9067	-0.9067	-0.9067	-0.9067	-0.9067	-0.9067	-0.9067	-0.9067	-0.9067			0.6451	0.6451	0.6451	0.6451	0.6451	0.6451	0.6451	0.6451	0.6451	0.6451
YPL266W	DIM1	-0.4286	-0.4286	-0.2602	-0.2265	-0.2265	-0.2265	-0.2265	-0.2265	-0.2265	-0.2265	-0.2265	-0.2265	-0.2265	-0.2265	-0.3217	-0.3217	-0.3217	-0.3217	-0.3217	-0.3217	-0.3217	-0.3217	-0.3217	-0.3217	-0.3217	-0.3217																						0.0223
YER094C	PUP3	-0.015	-0.015	-0.015	-0.015	-0.015	-0.015							-0.5046	-0.5046	-0.5046	-0.5046	-0.5046	-0.5046	-0.5046	-0.5046	-0.5046	-0.7056	-0.9067	-0.9067	-0.9067	-0.9067	-0.9067	-0.9067	-0.9067	-0.9067	-0.9067	-0.9067	-0.9067	-0.9067	-0.9067	-0.9067	-0.9067	-0.4748	0.1731	0.1731	0.1731	0.1731	0.1731	0.1731	0.1731	0.1731	0.1731	0.1731
YBR183W	YPC1	0.3497	0.3497	0.3497	0.3497	0.3497	0.3497	0.3497	0.3497	-0.5992	-0.5992	-0.5992	-0.5992	-0.5992	-0.5992	-0.5992	-0.5992	-0.5992	-0.5992	-0.5992
YJL117W	PHO86				-0.3746	-0.3746	-0.3746	-0.3746	-0.3746	-0.3746	-0.3746	-0.3746	-0.3746	-0.3746	-0.3746	-0.3746	-0.3746	-0.3746	-0.3961	-0.3997	-0.3997	-0.3997	-0.3997	-0.3997	-0.3997	-0.3997	-0.3997	-0.3997	-0.3997	-0.3997	-0.3997	-0.3997	-0.3997	-0.3997	-0.3997														-0.4491
YNL025C	SSN8	-0.8987	-0.8987	-0.8987	-0.8987	-0.8987	-0.8987	-0.8987	-0.8987	-0.8987	-0.8987	-0.8987	-0.8987	-0.8987	-0.8987
YNL322C	KRE1	-0.0769	-0.0769	-0.0769	-0.0769	-0.0769	-0.0769	-0.0769	-0.0769	-0.0769	-0.0769	-0.0769	-0.0769	-0.0769	-0.0769	-0.0769		0.2633	0.2633	0.2633	0.2633	0.2633	0.2633	0.2633	0.2633	0.2633	0.2633	0.2633	0.2633		0.1072	0.1072	0.1072	0.1072	0.1072	0.1072	0.1072	0.1072	0.1072	0.1072	0.1072	0.1072	0.1072	0.1072	0.1072
YKL007W	CAP1																																																-0.4573
YIL155C	GUT2	-0.2546	-0.3183	-0.892	-0.892	-0.892	-0.892	-0.892	-0.892	-0.892	-0.892	-0.892	-0.892	-0.892	-0.892	-0.892	-0.892	-0.892			-0.609	-0.609	-0.609	-0.609	-0.609	-0.609	-0.609	-0.609	-0.609	-0.609	-0.609	-0.609									-0.4451	-0.4451	-0.4451	-0.4451	-0.4451	-0.4451	-0.4451	-0.4451	-0.4451
YBR122C	MRPL36	-0.7569	-0.7569	-0.7569	-0.7569	-0.7569	-0.7569	-0.7569	-0.7569	-0.7569	-0.7569	-0.7569	-0.7569	-0.7569	-0.7569	-0.7569	-0.7569								-0.4372	-0.4372	-0.4372	-0.4372	-0.4372	-0.4372	-0.4372	-0.4372	-0.4372	-0.4372															0.2563
YJR099W	YUH1	0.747	0.747	0.747	0.747	0.747	0.747	0.747	0.747	0.747	0.747	0.747	0.747		0.1724	0.1724	0.1724	0.1724	0.1724	0.1724	0.1724	0.1724	0.1724	0.1724	0.1724	0.1724	0.1724	0.1724	0.1724									0.7868	0.7868	0.7868	0.7868	0.7868	0.7868	0.7868	0.7868	0.7868	0.7868	0.7868	0.7868
YKR083C	DAD2	-0.5769	-0.5769	-0.5769	-0.5769	-0.5769	-0.5769	-0.5769	-0.5769	-0.5769	-0.5769	-0.5769	-0.5769	-0.5769	-0.7655	-0.954	-0.954	-0.954	-0.954	-0.954	-0.954	-0.954	-0.954	-0.954	-0.954	-0.954			-0.8319	-0.8319	-0.8319	-0.8319	-0.8319	-0.8319	-0.8319	-0.8319	-0.8319	-0.8319	-0.8319	-0.8319	-0.8319
YOR089C	VPS21	-0.2952	-0.2952	-0.2952	-0.2952	-0.2952	-0.2952	-0.2952	-0.2952	-0.2952	-0.2952	-0.2952	-0.203	-0.203	-0.203	-0.203	-0.203	-0.203	-0.203	-0.203	-0.203	-0.203	-0.203	-0.203	-0.203	-0.203	-0.203	-0.203	-0.203
YBR162W-A	YSY6	-0.8836	-0.8836	-0.8836	-0.8836	-0.8836
YER056C	FCY2
YLR010C	TEN1	-0.129	-0.129	-0.129	-0.129	-0.129	-0.129	-0.129	0.0785	0.286	0.286	0.286	0.286	0.286	0.286	0.286	0.286	0.286	0.286	0.286	0.286	0.286	0.286																								-0.6213	-0.6213	-0.6213
YJL006C	CTK2	-0.0679	-0.0679	-0.0679	-0.0679	-0.0679	-0.0679	-0.0679	-0.0679	-0.0679	-0.0679	-0.0679													-0.0442	-0.0442	-0.0442	-0.0442	-0.0442	-0.0442	-0.0442	-0.0442	-0.0442	-0.0442	-0.0442	-0.0442	-0.0442	-0.0442	-0.0442	-0.0442
YOR066W	MSA1	0.4857						-0.8009	-0.8009	-0.8009	-0.8009	-0.8009	-0.8009	-0.8009	-0.8009	-0.8009	-0.8009
YNR062C		-0.1868	-0.1868	-0.1868						-0.0842	-0.0842	-0.0842	-0.0842	-0.0842	-0.0842	-0.0842	-0.0842	-0.0842	-0.0842	-0.0842	-0.0842	-0.0842	-0.0842	-0.0842	0.072	0.072	0.072	0.072	0.072	0.072	0.072	0.072	0.072	0.072						-0.1656	-0.1656	-0.1656	-0.1656	-0.1656	-0.1656	-0.1656	-0.1656	-0.1656	-0.1656
YLR408C		-1.0587	-1.0587	-1.0587	-1.0587	-1.0587	-1.0587	-1.0587	-1.0587	-1.0587	-1.0587	-1.0587	-1.0587	-1.0587				-0.6514	-0.6514	-0.6514	-0.6514	-0.6514	-0.6514	-0.6514	-0.6514	-0.6514	-0.6514	-0.6514	-0.6514	-0.6514	-0.6514	-0.6514	-0.6514	-0.6514															0.0095
YML054C	CYB2								-0.1674	-0.1674	-0.1674	-0.1674	-0.1674	-0.1674	-0.1674	-0.1674	-0.1674	-0.1674	-0.1674	-0.1674	0.11	0.11	0.11	0.11	0.11	0.11	0.11	0.11	0.11	0.11	0.11	0.11					-0.1067	-0.1067	-0.1067	-0.1067	-0.1067	-0.1067	-0.1067	-0.1067	-0.1067	-0.1067	-0.1067	-0.1067	-0.1067
YDR046C	BAP3																																														-0.9517	-0.9517	-0.9517
YDL002C	NHP10	0.1258	0.1258	0.1258	0.1258	0.1258	0.1258	0.1258	0.1258	0.1258	0.1258	0.1258	0.1258	0.1258	0.1258	-0.0645	-0.0645	-0.0645	-0.0645	-0.0645	-0.0645	-0.0645	-0.0645	-0.0645	-0.0645	-0.0645	-0.0645	-0.0645	-0.0645	-0.0645	-0.0645	-0.0645
YOR374W	ALD4	-1.3904	-1.3904	-1.3904	-1.3904	-1.3904	-1.3904	-1.3904	-1.3904	-1.3904	-1.3904	-1.3904	-1.3904																															0.2019	0.2019	0.2019	0.2019	0.2019	0.2019
YKR035W-A	DID2	-0.0549	-0.0549	-0.0643	-0.0738	-0.0738	-0.0738	-0.0738	-0.0738	-0.0738	-0.0738	-0.0738	-0.0738	-0.0738	-0.0738	-0.0738	-0.0738	-0.0738	-0.0738	-0.0738	-0.1234	-0.3217	-0.3217	-0.3217	-0.3217	-0.3217	-0.3217	-0.3217	-0.3217	-0.3217	-0.3217	-0.3217	-0.3217	-0.3217
YER007C-A	TMA20							-0.7742	-0.7742	-0.7742	-0.7742	-0.7742	-0.7742	-0.7742	-0.7742	-0.7742	-0.7742	-0.7742	-0.7742	-0.9331	-0.9331	-0.9331	-0.9331	-0.9331	-0.9331	-0.9331	-0.9331	-0.9331	-0.9331	-0.9331	-0.9331	-0.9331	-0.9331	-0.9331
YOL127W	RPL25	-0.5061	-0.5061																																														-0.9998
YML041C	VPS71
YGR023W	MTL1																						-0.7087	-0.7087	-0.7087	-0.7087	-0.7087	-0.7087	-0.7087	-0.7087	-0.7087	-0.7087	-0.7087	-0.7087	-0.7087	-0.7087	-0.7087	-0.7087	-0.7087	-0.7087	-0.7087
YPL117C	IDI1
YNL115C										-0.8836	-0.8836	-0.8836	-0.8836	-0.8836	-0.8836	-0.8836	-0.8836	-0.8836	-0.8836										-1.1582	-1.1582	-1.1582	-1.1582	-1.1582	-1.1582	-1.1582	-1.1582	-1.1582	-1.1582	-1.1582	-1.1582	-0.7171	-0.6436	-0.6436	-0.6436	-0.6436	-0.6436	-0.6436	-0.6436	-0.6436
YCL044C	MGR1	-0.3033	-0.3033	-0.3033	-0.3033	-0.3033	-0.3033	-0.3033	-0.3033	-0.3033	-0.3033	-0.3033	-0.3033	-0.2945	-0.2856	-0.2856	-0.2856	-0.2856	-0.2856	-0.2856	-0.2856	-0.2856	-0.2856	-0.2856	-0.2856	-0.2856	-0.2856	-0.2856	-0.2856	-0.2856	-0.2856																		-0.3844
YNL240C	NAR1	-0.2719	-0.2719	-0.2719	-0.2719	-0.2719	-0.2719	-0.2719	-0.2719	-0.2719	-0.2719	-0.2719	-0.2719	-0.2719	-0.2719	-0.4968	-0.4968	-0.4968	-0.4968	-0.4968	-0.4968	-0.4968	-0.4968	-0.4968	-0.4968						-0.7176	-0.7176	-0.7176	-0.7176	-0.7176	-0.7176	-0.7176	-0.7176	-0.7176	-0.7176							-0.55	-0.55	-0.55
YPL041C		-0.2847	-0.2847	-0.2847	-0.2847	-0.2847	-0.2847	-0.2847	-0.2847	-0.2847								-0.4916	-0.4916	-0.4916	-0.4916	-0.4916	-0.4916	-0.4916	-0.4916	-0.4916	-0.4916	-0.4916	-0.4916	-0.4916	-0.4916	-0.4916	-0.4916			0.2486	0.2486	0.2486	0.2486	0.2486	0.2486	0.2486	0.2486	0.2486	0.2486	0.2486
YDR259C	YAP6
YGR241C	YAP1802	-0.7406	-0.7406	-0.7406	-0.7406	-0.7406	-0.7406	-0.7406	-0.7406	-0.7406	-0.7406	-0.7406	-0.7406		-0.6046	-0.6046	-0.6046	-0.6046	-0.6046	-0.6046	-0.6046	-0.6046	-0.6046	-0.6046	-0.6046	-0.6046	-0.6046	-0.6046								-0.2062	-0.2062	-0.2062	-0.2062	-0.2062	-0.2062	-0.2062	-0.2062	-0.2062	-0.2062	-0.2062	-0.6627	-0.6627	-0.6627
YBR111C	YSA1	-1.1557	-1.1557	-1.1557	-1.1557	-1.1557	-1.1557	-1.1557							-0.6436	-0.6436	-0.6436	-0.6436	-0.6436	-0.6436	-0.6436	-0.6436	-0.6436	-0.6436	-0.6436	-0.6436	-0.6436	-0.6436	-0.6436			-0.4212	-0.4212	-0.4212	-0.4212	-0.4212	-0.4212	-0.4212	-0.4212	-0.4212	-0.4212	-0.4212	-0.4212	-0.3837	-0.3612	-0.3612	-0.3612	-0.3612	-0.3612
YCL002C		0.0868	0.0868	0.0868					-0.2524	-0.2524	-0.2524	-0.2524	-0.2524	-0.2524	-0.2524	-0.2524	-0.2524	-0.2524	-0.2524	-0.2524	-0.2524	-0.2524	-0.2524	-0.2524	-0.5265	-0.5265	-0.5265	-0.5265	-0.5265	-0.5265	-0.5265	-0.5265	-0.5265	-0.5265	-0.5265	-0.5265	-0.5265	-0.5265	-0.5265	-0.5265	-0.5265
YKL087C	CYT2	-0.8535	-0.8535	-0.8535	-0.8535	-0.8535	-0.8535	-0.8535	-0.8535	-0.8535	-0.8535	-0.8535	-0.8535	-0.8535	-0.8535														0.3787	0.3787	0.3787	0.3787	0.3787	0.3787	0.3787	0.3787	0.3787	0.3787	0.3787	0.3787	0.3787								0.3063
YPL094C	SEC62						0.3606	0.3606	0.3606	0.3606	0.3606	0.3606	0.3606	0.3606	0.3606	0.3606	0.0472	-0.1878	-0.1878	-0.1878	-0.1878	-0.1878	-0.1878	-0.1878	-0.1878	-0.1878	-0.1878	-0.1878	-0.1878	-0.1878
YPR193C	HPA2	-0.0057	-0.0057	-0.0057	-0.0057	-0.0057	-0.0057	-0.0057	-0.0057	-0.0057	-0.0057	-0.0057	-0.0057	-0.0057	-0.0057	-0.0057	-0.0057	-0.0057	-0.0057																							0.7938	0.7938	0.7938	0.7938	0.7938	0.7938	0.7938	0.7938
YOR223W		-0.4288	-0.442	-0.442	-0.442	-0.442	-0.442	-0.442	-0.442	-0.442	-0.442	-0.5972	-0.6145	-0.6145	-0.6145	-0.6145	-0.6145	-0.6145	-0.6145	-0.6145	-0.6145	-0.6145	-0.6145																										-0.4778
YCR052W	RSC6					0.0568	0.0568	0.0568	0.0568	0.0568	0.0568	0.0568	0.0568	0.0568	0.0568	0.0568	0.3304	0.3304	0.3304	0.3304	0.3304	0.3304	0.3304	0.3304	0.3304	0.3304			-0.0322	-0.0322	-0.0322	-0.0322	-0.0322	-0.0322	-0.0322	-0.0322	-0.0322	-0.0322	-0.0322	-0.0322	-0.0322	-0.0322	-0.0322	-0.0322	-0.0322
YNL187W	SWT21		0.4559	0.4559	0.4559	0.4559	0.4559	0.4559	0.4559	0.4559	0.4559	0.4559	0.3942	0.3325	0.3325	0.3325	0.3325	0.3325	0.3325	0.3325	0.3325	0.3325	0.3325	0.3325										0.0095	0.0095	0.0095	0.0095	0.0095	0.0095	0.0095	0.0095	0.0095	0.0095	0.0095	0.0095	0.0095	0.0095	0.0095	-0.2258
YOR311C	DGK1
YPL059W	GRX5	0.0933	0.0933	0.0933	0.0933	0.0933	0.0933								-1.0835	-1.0835	-1.0835	-1.0835	-1.0835	-1.0835	-1.0835	-1.0835	-1.0835	-1.0835
YOL007C	CSI2	-0.3217	-0.3217	-0.3217	-0.3217	-0.3217	-0.3217	-0.3217	-0.3217	-0.3217	-0.3217	-0.3217	-0.3217	-0.3217	-0.3217	-0.3217	-0.3217	-0.3217	-0.3217														-0.8928	-0.8928	-0.8928	-0.8928	-0.8928	-0.8928	-0.8928	-0.8928	-0.8928	-0.8928	-0.8928	-0.8928	-0.8928	-0.8928	-0.8928	-0.8928	-0.8928
YDR412W	RRP17	0.2049	0.2049	0.2049	0.2049	0.2049	0.2049	0.2049	0.2049	0.2049	0.2049	0.2049	0.2049	0.2049	0.2049	0.2049	0.2049	0.2049	-0.1983	-0.1983	-0.1983	-0.1983	-0.1983	-0.1983	-0.1983	-0.1983	-0.1983	-0.1983	-0.1983	-0.1983	-0.1983	-0.1983	-0.1983	-0.1983	-0.1983														-0.5938
YJR109C	CPA2	0.6556	0.6556	0.6556	0.6556	0.6556	0.6556	0.6556	0.6556	0.6556	0.6556	0.6556	0.6556																														-0.8671	-0.8671	-0.8671	-0.8671	-0.8671	-0.8671	-0.8671
YMR065W	KAR5	-0.4248	-0.4248	-0.6124	-0.6436	-0.6436	-0.6436	-0.6436	-0.6436	-0.6436	-0.6436	-0.6436	-0.6436	-0.6436	-0.6436	-0.6436	-0.6436	-0.6436	-0.8872	-0.9915	-0.9915	-0.9915	-0.9915	-0.9915	-0.9915	-0.9915	-0.9915	-0.9915	-0.9915														-0.7222	-0.7222	-0.7222	-0.7222	-0.7222	-0.7222	-0.7222
YDR284C	DPP1									-0.0934	-0.0934	-0.0934	-0.0934	-0.0934	-0.0934	-0.0934	-0.0934	-0.0934	-0.0934	-0.0934	-0.0934																											-0.6358	-0.6358
YER024W	YAT2	0.0433		-0.0253	-0.0253	-0.0253	-0.0253	-0.0253	-0.0253	-0.0253	-0.0253	-0.0253	-0.0253	-0.0253	-0.1147	-0.4721	-0.4721	-0.4721	-0.4721	-0.4721	-0.4721	-0.4721	-0.4721	-0.4721	-0.4721	-0.4721	-0.4721	-0.4721	-0.4721	-0.4721	-0.4721				-0.2546	-0.2546	-0.2546	-0.2546	-0.2546	-0.2546	-0.2546	-0.2546	-0.2546	-0.2546				-0.2222	-0.2222
YNL117W	MLS1																		-0.9924	-0.9924	-0.9924	-0.9924	-0.9924	-0.9924	-0.9924	-0.9924	-0.9924	-0.9924	-0.9924	-0.9924	-0.9924	-0.9924	-0.9924
YNL192W	CHS1	-1.0847	-1.0847	-1.0847	-1.0847	-1.0579	-0.9244	-0.9244	-0.9244	-0.9244	-0.9244	-0.9244	-0.9244	-0.9244	-0.9244	-0.9244	-0.9244	-0.9244	-0.9244	-0.9244	-0.9244	-0.9244																										-0.3217	-0.3217
YJR052W	RAD7	-0.0766	-0.0766	-0.0766	-0.0766	-0.0766	-0.0766	-0.0766	-0.0766	-0.0766	-0.0766					-0.1518	-0.1518	-0.1518	-0.1518	-0.1518	-0.1518	-0.1518	-0.1518	-0.1518	-0.1518	-0.1518	-0.1518	-0.1518	-0.1518	-0.1518	-0.1518
YIL160C	POT1	0.5981	0.5981	0.5981	0.5981	0.5981	0.5981	0.5981	0.5981	0.4564	0.3146	0.3146	0.3146	0.3146	0.3146	0.3146	0.3146	0.3146	0.3146	0.3146	0.3146	0.3146	0.3146	0.3146	0.3146	0.3146							1.0409	1.0409	1.0409	1.0409	1.0409	1.0409	1.0409	1.0409	1.0409	1.0409	1.0409	1.0409	1.0409	1.0409	0.6901	0.5731	0.5731
YOR304C-A		0.0602	0.0602	0.0602	0.0602	-0.0521	-0.0521	-0.0521	-0.0521	-0.0521	-0.0521	-0.0521	-0.0521	-0.0521	-0.0521	-0.0521	-0.0521	-0.0521	-0.0521	-0.0521	-0.0541	-0.0723	-0.0723	-0.0723	-0.0723	-0.0723	-0.0723	-0.0723	-0.0723	-0.0723	-0.0723	-0.0723	-0.0723	-0.0723	-0.0723	-0.0723	-0.0723	-0.0723
YLR021W	IRC25	0.1929	0.1929	0.1929	0.1929	0.1929	0.1929	0.1929	0.1929	-0.0766	-0.0766	-0.0766	-0.0766	-0.0766	-0.0766	-0.0766	-0.0766	-0.0766	-0.0766	-0.0766	-0.0766	-0.0766	-0.0766	-0.0766				-0.1619	-0.1619	-0.1619	-0.1619	-0.1619	-0.1619	-0.1619	-0.1619	-0.1619	-0.1619	-0.1619	-0.1619	-0.1619	-0.1619	-0.1619
YML019W	OST6	-0.3066	-0.3066	-0.5407	-0.5407	-0.5407	-0.5407	-0.5407	-0.5407	-0.5407	-0.5407	-0.5407	-0.5407	-0.5407	-0.5407	-0.5407	-0.5407	-0.5407	-0.5407			-0.253	-0.253	-0.253	-0.253	-0.253	-0.253	-0.253	-0.253	-0.253	-0.253	-0.253
YIR019C	MUC1	0.4559	0.4559	0.4559	0.4559	0.4559	0.4559	0.4559	0.4559	0.4559	0.4559	0.4559			0.1409	0.1409	0.1409	0.1409	0.1409	0.1409	0.1409	0.1409	0.1409	0.1409	0.1409	0.1409	0.1409	0.1409	0.1409	0.1409	0.1409							-0.2286	-0.2286	-0.2286	-0.2286	-0.2286	-0.2286	-0.2286	-0.2286	-0.2286	-0.2286	-0.2286	-0.2286
YDR075W	PPH3					-0.5441	-0.5441	-0.5441	-0.5441	-0.5441	-0.5441	-0.5441	-0.5441	-0.5441	-0.5441	-0.5441	-0.5441	-0.5441	-0.5441																													-0.2711	-0.2711
YDR309C	GIC2																																														-0.5847	-0.5847	-0.5847
YLR028C	ADE16	-0.866	-0.866	-0.866	-0.866	-0.866	-0.866	-0.866	-0.866	-0.866	-0.866	-0.866	-0.866	-0.866								-1.3455	-1.3455	-1.3455	-1.3455	-1.3455	-1.3455	-1.3455	-1.3455	-1.3455	-1.3455	-1.3455	-1.3455	-1.3455	-1.3455
YGL040C	HEM2	-0.8811	-0.8811	-0.8811	-0.8811	-0.8811	-0.8811	-0.8811	-0.8811	-0.8811			-1.1019	-1.1019	-1.1019	-1.1019	-1.1019	-1.1019	-1.1019	-1.1019	-1.1019	-1.1019	-1.1019	-1.1019	-1.1019	-1.1019	-1.1019	-1.1019																			-0.3541	-0.3541	-0.3541
YMR025W	CSI1	0.3204	0.3204							0.1246	0.1246	0.1246	0.1246	0.1246	0.1246	0.1246	0.1246	0.1246	0.1246					-0.1052	-0.1052	-0.1052	-0.1052	-0.1052	-0.1052	-0.1052	-0.1052	-0.1052	-0.1052	-0.1052	-0.1052	-0.1052	-0.1052	-0.1052	-0.1052	-0.1052	-0.1052
YPL063W	TIM50	0.5061	0.5061	0.5061	0.5061	0.5061	0.447	0.447	0.447	0.447	0.447	0.447	0.447	0.447	0.447	0.447	0.447	0.447	0.447	0.447	-0.5403	-0.5403	-0.5403	-0.5403	-0.5403	-0.5403	-0.5403	-0.5403	-0.5403	-0.5403	-0.5403	-0.5403	-0.5403	-0.5403	-0.5403	-0.5403	-0.5403
YLR195C	NMT1										0.4509	0.4509	0.4509	0.4509	0.4509	0.4509	0.4509	0.4509	0.4509	0.4509	0.4509	0.4509	0.4509	0.4509					-0.6696	-0.6696	-0.6696	-0.6696	-0.6696	-0.6696	-0.6696	-0.6696	-0.6696	-0.6696	-0.6696	-0.6696	-0.6696	-0.6696	-0.6696				-0.0993	-0.0993	-0.0993
YBR161W	CSH1	-0.4136	-0.4136																														-0.7763	-0.7763	-0.7763	-0.7763	-0.7763	-0.7763	-0.7763	-0.7763	-0.7763	-0.7763	-0.7763	-0.7763	-0.7763	-0.7763	-0.7763	-0.7763
YPR176C	BET2	0.1329			0.5263	0.5263	0.5263	0.5263	0.5263	0.5263	0.5263	0.5263	0.5263	0.5263	0.5263	0.5263	0.5263	0.5263	0.5263	0.5263	0.5263								-0.2907	-0.2907	-0.2907	-0.2907	-0.2907	-0.2907	-0.2907	-0.2907	-0.2907	-0.2907	-0.2907
YOR045W	TOM6				0.0288	0.0288	0.0288	0.0288	0.0288	0.0288	0.0288	0.0288	0.0288	0.0288	0.0288	0.0288				0.0933	0.0933	0.0933	0.0933	0.0933	0.0933	0.0933	0.0933	0.0933	0.0933	0.0933	0.0933	0.0933	0.0933	0.0933	0.0933	0.0933													0.1559
YOL152W	FRE7	-0.8468	-0.8468	-0.8468	-0.8468	-0.8468	-0.8468	-0.8468	-0.8468	-0.8468	-0.8468						-0.2885	-0.2885	-0.2885	-0.2885	-0.2885	-0.2885	-0.2885	-0.2885	-0.2885	-0.2885	-0.2885	-0.2885		-0.8692	-0.8692	-0.8692	-0.8692	-0.8692	-0.8692	-0.8692	-0.8692	-0.8692	-0.8692	-0.8692	-0.8692	-0.8692	-0.8692	-0.8692	-0.8692
YML106W	URA5	-0.1322	-0.1322	-0.3006	-0.3217	-0.3217	-0.3217	-0.3217	-0.3217	-0.3217	-0.3217	-0.3217	-0.3217	-0.3217	-0.3217	-0.3217	-0.3217	-0.3217	-0.3217	-0.3324	-0.3503	-0.3503	-0.3503	-0.3503	-0.3503	-0.3503	-0.3503	-0.3503	-0.3503	-0.3503	-0.3503	-0.3503	-0.3503	-0.3503	-0.3503
YOR313C	SPS4	-0.8522	-0.8522	-0.8522	-0.8522	-0.8522	-0.8522	-0.8522	-0.8522	-0.8522	-0.8522	-0.8522	-0.0807	-0.0807	-0.0807	-0.0807	-0.0807	-0.0807	-0.0807	-0.0807	-0.0807	-0.0807	-0.0807								-0.5441	-0.5441	-0.5441	-0.5441	-0.5441	-0.5441	-0.5441	-0.5441	-0.5441	-0.5441	-0.5441	-0.5441	-0.5441	-0.5441	-0.5441	-0.5441	-0.5441
YOR044W	IRC23	-0.5847	-0.5847	-0.5847	-0.5847	-0.5847	-0.5847	-0.5847	-0.5847	-0.5847	-0.5847	-0.5847				-0.5754	-0.5754	-0.5754	-0.5754	-0.5754	-0.5754	-0.5754	-0.5754	-0.5754	-0.5754	-0.5754		-0.705	-0.705	-0.705	-0.705	-0.705	-0.705	-0.705	-0.705	-0.705	-0.705	-0.705	-0.705
YCR048W	ARE1	0.578	0.578	0.578	0.578	0.578	0.578	0.578	0.578	0.578	0.578	0.578	0.578	0.578	0.578	0.578	0.419	0.101	0.101	0.101	0.101	0.101	0.101	0.101	0.101	0.101	0.101
YFL027C	GYP8																									-1.5973	-1.5973	-1.5973	-1.5973	-1.5973	-1.5973	-1.5973	-1.5973	-1.5973	-1.5973	-1.5973	-1.5973	-1.5973	-1.5973
YLR142W	PUT1	-1.3031	-1.3031	-1.3031	-1.3031	-1.3031	-1.3031	-1.3031	-1.3031	-1.3031	-1.3031	-1.3031																			-0.7017	-0.7017	-0.7017	-0.7017	-0.7017	-0.7017	-0.7017	-0.7017	-0.7017	-0.7017	-0.7017	-0.7017	-0.7017	-0.7017	-0.7017	-0.7017	-0.7017
YOR187W	TUF1	-0.2658			0.2633	0.2633	0.2633	0.2633	0.2633	0.2633	0.2633	0.2633	0.2633	0.2633	0.2633	0.2633	0.2633	0.2633	0.2633
YOR246C																																																-0.6567	-0.6567
YBR297W	MAL33	-0.1728	-0.1728	-0.1728	-0.1728	-0.1728	-0.1728	-0.1728	-0.1728	-0.1728	-0.1728							-0.9305	-0.9305	-0.9305	-0.9305	-0.9305	-0.9305	-0.9305	-0.9305	-0.9305	-0.9305	-0.9305	-0.9305	-0.9305				-0.2392	-0.2392	-0.2392	-0.2392	-0.2392	-0.2392	-0.2392	-0.2392	-0.2392	-0.2392
YLR439W	MRPL4	-0.6599	-0.6599	-0.6599	-0.6599	-0.6599	-0.6599	-0.6599	-0.6599	-0.6599	-0.6599	-0.6428	-0.6086	-0.6086	-0.6086	-0.6086	-0.6086	-0.6086	-0.6086	-0.6086	-0.6086	-0.6086	-0.6086	-0.6086	-0.4592	-0.4592	-0.4592	-0.4592	-0.4592	-0.4592	-0.4592	-0.4592	-0.4592	-0.4592	-0.4592	-0.4592	-0.4592	-0.4592	-0.4592	-0.4592							0.3846	0.3846	0.3846
YGL005C	COG7	-0.3783	-0.3783	-0.3783	-0.3865	-0.3865	-0.3865	-0.3865	-0.3865	-0.3865	-0.3865	-0.3865	-0.3865	-0.3865	-0.3865	-0.3865	-0.3865	-0.3865	-0.3865	-0.3865	-0.3865	-0.3865		-0.4737	-0.4737	-0.4737	-0.4737	-0.4737	-0.4737	-0.4737	-0.4737	-0.4737	-0.4737	-0.4737	-0.4737	-0.4737	-0.4737	-0.2692	-0.2692	-0.2692	-0.2692	-0.2692	-0.2692	-0.2692	-0.2692	-0.2692	-0.2692	-0.2692	-0.5245
YGR042W								-0.593	-0.593	-0.593	-0.593	-0.593	-0.593	-0.593	-0.593	-0.593	-0.593	-0.593	-0.593	-0.593	-0.593	-0.593	-0.593	-0.593			0.0051	0.0051	0.0051	0.0051	0.0051	0.0051	0.0051	0.0051	0.0051	0.0051	0.0051	0.0051						0.1902	0.1902	0.1902	0.1902	0.1902	0.1902
YOL002C	IZH2										-0.6213	-0.6213	-0.6213	-0.6213	-0.6213	-0.6213	-0.6213	-0.6213	-0.6213	-0.6213	-0.7997	-0.7997	-0.7997	-0.7997	-0.7997	-0.7997	-0.7997	-0.7997	-0.7997	-0.7997	-0.7997	-0.7997	-0.7997	-0.7997	-0.7997	-0.7997	-0.7997											-0.3217	-0.3217
YFL046W	FMP32	0.154	0.154	0.154	0.154	0.154					0.0298	0.0298	0.0298	0.0298	0.0298	0.0298	0.0298	0.0298	0.0298	0.0298	0.0298				0.1258	0.1258	0.1258	0.1258	0.1258	0.1258	0.1258	0.1258	0.1258	0.1258	0.1258
YLR126C		-0.1697	-0.1697	-0.1697	-0.1697	-0.1697	-0.1697	-0.1697	-0.1697	-0.1697	-0.1697	-0.1697	-0.1697	-0.1697	-0.1697	-0.1697	-0.1697	-0.1697	-0.1697	-0.3806	-0.3806	-0.3806	-0.3806	-0.3806	-0.3806	-0.3806	-0.3806	-0.3806	-0.3806	-0.3806	-0.3806	-0.3806			0.0788	0.0788	0.0788	0.0788	0.0788	0.0788	0.0788	0.0788	0.0788	0.0788	0.0788	0.0788	0.0788
YEL001C	IRC22	-0.4957	-0.4957	-0.4957	-0.4957	-0.4957	-0.4957	-0.4957	-0.4957	-0.4957	-0.4957	-0.4957	-0.4957	-0.4957	-0.4957			-0.9777	-0.9777	-0.9777	-0.9777	-0.9777	-0.9777	-0.9777	-0.9777	-0.9777	-0.9777	-0.9777		0.144	0.144	0.144	0.144	0.144	0.144	0.144	0.144	0.144	0.144	0.144
YKR094C	RPL40B	-0.7367	-0.7367						-0.0221	-0.0221	-0.0221	-0.0221	-0.0221	-0.0221	-0.0221	-0.0221	-0.0221	-0.0221		-0.0856	-0.0856	-0.0856	-0.0856	-0.0856	-0.0856	-0.0856	-0.0856	-0.0856	-0.0856	-0.0856
YMR052W	FAR3	-0.8873	-0.8873	-0.8873	-0.8873	-0.8873	-0.8873	-0.8873	-0.8873	-0.8873	-0.8873																																				-0.5061	-0.5061	-0.5061
YDR305C	HNT2	0.2964	0.2964	0.2964	0.2964	0.2964	0.2964			-0.0262	-0.0262	-0.0262	-0.0262	-0.0262	-0.0262	-0.0262	-0.0262	-0.0262	-0.0262	-0.0262	-0.0262	-0.0262	-0.0262	-0.0262	-0.0262				-0.6843	-0.6843	-0.6843	-0.6843	-0.6843	-0.6843	-0.6843	-0.6843	-0.6843	-0.6843	-0.6843	-0.6843	-0.6843								-0.1087
YDR113C	PDS1	0.0043	0.0043	0.0043	0.0043	0.0043	0.0043	0.0043	0.0043	0.0043	0.0043	0.0043	0.0043	0.0043																-0.9067	-0.9067	-0.9067	-0.9067	-0.9067	-0.9067	-0.9067	-0.9067	-0.9067	-0.9067	-0.9067	-0.9067
YGL061C	DUO1	0.53	0.53	0.53	0.53	0.53	0.53	0.3535	0.3535	0.3535	0.3535	0.3535	0.3535	0.3535	0.3535	0.3535	0.3535	0.3535	0.3535	0.3535	0.3535	0.3535	0.3535		0.0298	0.0298	0.0298	0.0298	0.0298	0.0298	0.0298	0.0298	0.0298	0.0298	0.0298	0.0298	0.0298	0.0298	0.0298	0.0298									-0.1173
YBR255C-A		0.3813	0.3813	0.3813	0.3813	0.3813	0.3813	0.3813	0.3813	0.3813																	-0.3217	-0.3217	-0.3217	-0.3217	-0.3217	-0.3217	-0.3217	-0.3217	-0.3217	-0.3217	-0.3217	-0.3217	0.1783	0.6783	0.6783	0.6783	0.6783	0.6783	0.6783	0.6783	0.6783	0.6783	0.6783
YCL018W	LEU2
YGL162W	SUT1	-1.1518	-1.1518	-1.1518	-1.1518	-1.1518																						-0.419	-0.419	-0.419	-0.419	-0.419	-0.419	-0.419	-0.419	-0.419	-0.419	-0.419	-0.419	-0.419	-0.419	-0.419
YOL112W	MSB4	-0.1164	-0.1164	-0.1164	-0.1164	-0.1164	-0.1164	-0.1164	-0.1164	-0.1164	-0.1164	-0.1164	-0.1164	-0.1164	-0.1164	-0.1164	-0.1164	-0.0959	0.0882	0.0882	0.0882	0.0882	0.0882	0.0882	0.0882	0.0882	0.0882	0.0882	0.0882	0.0882																	-0.0943	-0.0943	-0.0943
YIL023C	YKE4	0.2512	0.2512	0.2512	0.2512	0.2512	0.2512	0.2512	0.2512	0.2512	0.2512	0.2512	-0.0136	-0.0136	-0.0136	-0.0136	-0.0136	-0.0136	-0.0136	-0.0136	-0.0136	-0.0136	-0.0136	-0.0136	-0.0136	-0.0136	-0.0136	-0.0136	-0.0136	-0.0136	-0.0136													-0.5143	-0.5143	-0.5143	-0.5143	-0.5143	-0.5143
YGL205W	POX1							0.1046	0.1046	0.1046	0.1046	0.1046	0.1046	0.1046	0.1046	0.1046	0.1046																										-0.3661	-0.3661	-0.3661	-0.3661	-0.3661	-0.3661	-0.3661
YKR017C		-0.1332	-0.1332	-0.1332	-0.1332	-0.1332	-0.1332	-0.1332	-0.1332	-0.1332	-0.1332	-0.0664	-0.0664	-0.0664	-0.0664	-0.0664	-0.0664	-0.0664	-0.0664	-0.0664	-0.1339	-0.7408	-0.7408	-0.7408	-0.7408	-0.7408	-0.7408	-0.7408	-0.7408	-0.7408	-0.7408	-0.7408	-0.7408	-0.7408	-0.7408	-0.7408	-0.7408	-0.3217	-0.3217	-0.3217	-0.3217	-0.3217	-0.3217	-0.3217	-0.3217	-0.3217	-0.3217	-0.3217	-0.3217
YJR050W	ISY1			0.7087	0.7087	0.7087	0.7087	0.7087	0.7087	0.7087	0.7087	0.7087	0.7087	0.7087	0.7087	0.7087	0.7087	0.7087	0.7087	0.7087	0.7087				0.2368	0.2368	0.2368	0.2368	0.2368	0.2368	0.2368	0.2368	0.2368	0.2368	0.2368	0.2368	0.2368	0.2368	0.4786	0.6398	0.6398	0.6398	0.6398	0.6398	0.6398	0.6398	0.6398	0.6398	0.6398
YJR101W	RSM26						-0.7289	-0.7289	-0.7289	-0.7289	-0.7289	-0.7289	-0.7289	-0.7289	-0.7289	-0.7289	-0.7289	-0.7289	-0.7289	-0.7289	-0.7289	-0.7289	-0.7289
YAL042W	ERV46	0.8615	0.8615	0.8615	0.8615	0.8615	0.8615	0.8615	0.8615	0.8615	0.8615	0.8615	0.8615					0.4936	0.4936	0.4936	0.4936	0.4936	0.4936	0.4936	0.4936	0.4936	0.4936	0.4936	0.4936	0.4936	0.4936	0.4936	0.4936
YHR072W	ERG7	-0.182	-0.182	-0.182	-0.182	-0.182							0.3439	0.3439	0.3439	0.3439	0.3439	0.3439	0.3439	0.3439	0.3439	0.3439	0.3439	-0.4852	-0.4852	-0.4852	-0.4852	-0.4852	-0.4852	-0.4852	-0.4852	-0.4852	-0.4852	-0.4852	-0.4852														-0.4309
YJL068C		0.5371	0.5371	0.5371			0.1828	0.1828	0.1828	0.1828	0.1828	0.1828	0.1828	0.1828	0.1828	0.1828	0.1828	0.1828	0.1828	0.1828	0.1828	0.1516	-0.129	-0.129	-0.129	-0.129	-0.129	-0.129	-0.129	-0.129	-0.129	-0.129	-0.129	-0.129	-0.129	-0.129	-0.129					0.7778	0.7778	0.7778	0.7778	0.7778	0.7778	0.7778	0.7778
YGR029W	ERV1	-0.3012	-0.3012	-0.3012	-0.3012	-0.3012	-0.3012	-0.3012	-0.3012	-0.3012	-0.3012			-0.0766	-0.0766	-0.0766	-0.0766	-0.0766	-0.0766	-0.0766	-0.0766	-0.0766	-0.0766																								-0.2907	-0.2907	-0.2907
YPR158W	CUR1																		-0.9067	-0.9067	-0.9067	-0.9067	-0.9067	-0.9067	-0.9067	-0.9067	-0.9067	-0.9067	-0.9067	-0.9067	-0.9067
YGR040W	KSS1						-1.2107	-1.2107	-1.2107	-1.2107	-1.2107	-1.2107	-1.2107	-1.2107	-1.2107	-1.2107	-1.2107	-1.2107	-1.2107	-1.2107	-1.2107	-1.2107	-1.2107	-0.6885	-0.6885	-0.6885	-0.6885	-0.6885	-0.6885	-0.6885	-0.6885	-0.6885	-0.6885	-0.6885	-0.6885	-0.6885									-0.7912	-0.7912	-0.7912	-0.7912	-0.7912
YKL053C-A	MDM35	-0.0863	-0.0863	-0.0863	-0.0863	0.022	0.2747	0.2747	0.2747	0.2747	0.2747	0.2747	0.2747	0.2747	0.2747	0.2747	0.2747	0.2747	0.2747				-0.2583	-0.2583	-0.2583	-0.2583	-0.2583	-0.2583	-0.2583	-0.2583	-0.2583	-0.2583	-0.2583	-0.2583	-0.2583	-0.2583	-0.2583
YBR084C-A	RPL19A
YFL045C	SEC53	-0.5763	-0.5763	-0.5763	-0.5763	-0.5763	-0.5763	-0.5763	-0.5763	-0.5763	-0.5763	-0.5763	-0.5763	-0.5763	-0.5763	-0.5763	-0.5763	-0.5763		-0.7367	-0.7367	-0.7367	-0.7367	-0.7367	-0.7367	-0.7367	-0.7367	-0.7367	-0.7367	-0.7367	-0.7367	-0.7367	-0.7367	-0.7367
YOR123C	LEO1		-1.0221	-1.0221	-1.0221	-1.0221	-1.0221	-1.0221	-1.0221	-1.0221	-1.0221	-1.0221	-1.0221	-1.0221	-1.0221			-0.7547	-0.7547	-0.7547	-0.7547	-0.7547	-0.7547	-0.7547	-0.7547	-0.7547	-0.7547	-0.7547	-0.7547	-0.7547	-0.7547	-0.7547	-0.7547	-0.7547	-0.7547	-0.7547													0.1399
YJL181W		-0.2392	-0.2392	-0.2392	0.0212	0.0212	0.0212	0.0212	0.0212	0.0212	0.0212	0.0212	0.0212	0.0212	0.0212	0.0212	0.0212	0.0933	0.0933	0.0933	0.0933	0.0933	0.0933	0.0933	0.0933	0.0933	0.0933	0.0933	0.0933	0.0933	0.0933	0.0933
YKL058W	TOA2	0.1308	0.1308	0.1308	0.1308	0.1308	0.1308	0.1308	0.1308	0.1308	0.1308	0.1308	0.1308	0.1308	0.1308	0.1308	0.1308	0.1308	0.1308									-0.1466	-0.1466	-0.1466	-0.1466	-0.1466	-0.1466	-0.1466	-0.1466	-0.1466	-0.1466	-0.1466											-0.1131
YGR110W					-0.6018	-0.6018	-0.6018	-0.6018	-0.6018	-0.6018	-0.6018	-0.6018	-0.6018	-0.6018	-0.6018	-0.6018	-0.6018	-0.6018									0.4939	0.4939	0.4939	0.4939	0.4939	0.4939	0.4939	0.4939	0.4939	0.4939											-0.5578	-0.5578	-0.5578
YHR123W	EPT1	0.0756	0.0756	0.0756	0.0756	0.0756	0.0756	0.0756	0.0756	0.0756	0.0756	0.0756	0.0756	0.0756				0.5408	0.5408	0.5408	0.5408	0.5408	0.5408	0.5408	0.5408	0.5408	0.5408	0.5408		-0.4313	-0.4313	-0.4313	-0.4313	-0.4313	-0.4313	-0.4313	-0.4313	-0.4313	-0.4313	-0.4313	-0.4313	-0.4313	-0.4313	-0.4313
YPR128C	ANT1	0.5667	0.5667	0.5667	0.5667	0.5667	0.5667	0.5667	0.5667	0.5667	0.5667	0.5667	0.5667	0.5667	0.5667														-0.1719	-0.1719	-0.1719	-0.1719	-0.1719	-0.1719	-0.1719	-0.1719	-0.1719	-0.1719	-0.1719	-0.1719	-0.1719	-0.1719	-0.1719	-0.1719	-0.1719	-0.1719		-0.2244	-0.2244
YHR083W	SAM35					-0.3497	-0.3497	-0.3497	-0.3497	-0.3497	-0.3497	-0.3497	-0.3497	-0.3497	-0.3497	-0.3497	-0.3497	-0.3497	-0.3497	-0.8645	-0.8645	-0.8645	-0.8645	-0.8645	-0.8645	-0.8645	-0.8645	-0.8645	-0.8645	-0.8645	-0.8645	-0.8645	-0.8645	-0.8645	-0.8645			0.4488	0.4488	0.4488	0.4488	0.4488	0.4488	0.4488	0.4488	0.4488	0.4488	0.4488	0.4488
YCR047C	BUD23	0.0135	0.0135	0.0135	0.0135	0.0135	0.0135	0.0135	0.0135	0.0135	0.0135	0.0135	0.0135	0.0135	0.0135	0.0135	0.0135	-0.0131	-0.1195	-0.1195	-0.1195	-0.1195	-0.1195	-0.1195	-0.1195	-0.1195	-0.1195	-0.1195	-0.1195	-0.1195	-0.1195	-0.1195	-0.1195	-0.1195
YHR163W	SOL3		-0.6071	-0.6071	-0.6071	-0.6071	-0.6071	-0.6071	-0.6071	-0.6071	-0.6071	-0.6071	-0.6071	-0.6071	-0.6071	-0.6071	-0.6071	-0.6071	-0.6071	-0.7578	-0.7578	-0.7578	-0.7578	-0.7578	-0.7578	-0.7578	-0.7578	-0.7578	-0.7578	-0.7578	-0.7578	-0.7578														-0.3888	-0.3888	-0.3888	-0.3888
YIL004C	BET1	-0.0532											-0.3514	-0.3514	-0.3514	-0.3514	-0.3514	-0.3514	-0.3514	-0.3514	-0.3514	-0.3514	-0.3514	-0.3514	-0.3514	-0.3514	-0.3514	-0.3514	-0.3514	-0.3514		-0.1518	-0.1518	-0.1518	-0.1518	-0.1518	-0.1518	-0.1518	-0.1518	-0.1518	-0.1518	-0.1518
YJR003C		-0.8577	-0.8577	-0.8577	-0.8577	-0.8577	-0.8577	-0.8577	-0.8577	-0.8577	-0.8577	-0.8577	-0.7653	-0.7653	-0.7653	-0.7653	-0.7653	-0.7653	-0.7653	-0.7653	-0.7653	-0.7653
YOL026C	MIM1	-0.4413	-0.4413	-0.4413																													-0.6372	-0.6372	-0.6372	-0.6372	-0.6372	-0.6372	-0.6372	-0.6372	-0.6372	-0.6372
YCL034W	LSB5	-0.1442	-0.1442	-0.1442	-0.1442	-0.1442	-0.1442	-0.1442	-0.1442	-0.1442	-0.1442	-0.1442	-0.1442	-0.1442	-0.1442	-0.1442				-0.5578	-0.5578	-0.5578	-0.5578	-0.5578	-0.5578	-0.5578	-0.5578	-0.5578	-0.5578	-0.5578	-0.5578	-0.5578	-0.5578	-0.5578	-0.5578	-0.5578										0.1575	0.1575	0.1575	0.1575
YML077W	BET5	-0.0924	-0.0711	-0.0711	-0.0711	-0.0711	-0.0711	-0.0711	-0.0711	-0.0711			0.4237	0.4237	0.4237	0.4237	0.4237	0.4237	0.4237	0.4237	0.4237	0.4237	0.4237	0.4237	0.4237	0.4237	0.4237	0.4237	0.4237									0.3091	0.3091	0.3091	0.3091	0.3091	0.3091	0.3091	0.3091	0.3091	0.3091	0.3091
YGR127W		-0.129	-0.129	-0.129	-0.129	-0.129						-0.1749	-0.1749	-0.1749	-0.1749	-0.1749	-0.1749	-0.1749	-0.1749	-0.1749	-0.1749	-0.1749	-0.1749	-0.1749	-0.1749	-0.1749	-0.1749	-0.1749	-0.0185	0.216	0.216	0.216	0.216	0.216	0.216	0.216	0.216	0.216	0.216
YNL001W	DOM34	-0.5143	-0.5143	-0.5143	-0.5143	-0.5143	-0.5143	-0.5143	-0.5143	-0.5143	-0.5143	-0.5143			-0.6843	-0.6843	-0.6843	-0.6843	-0.6843	-0.6843	-0.6843	-0.6843	-0.6843	-0.6843	-0.6843	-0.6843	-0.6843	-0.6843	-0.6843																			-0.2121	-0.2121
YER124C	DSE1																							-0.3742	-0.3742	-0.3742	-0.3742	-0.3742	-0.3742	-0.3742	-0.3742	-0.3742	-0.3742	-0.3742	-0.3742	-0.3742	-0.3742	-0.3742	-0.3742	-0.3742	-0.3742			-0.3742	-0.3742	-0.3742	-0.3742	-0.3742	-0.3742
YPL181W	CTI6			-1.0136	-1.0136	-1.0136	-1.0136	-1.0136	-1.0136	-1.0136	-1.0136	-1.0136	-1.0136	-1.0136	-1.0136	-1.0136	-1.0136	-0.6018	-0.6018	-0.6018	-0.6018	-0.6018	-0.6018	-0.6018	-0.6018	-0.6018	-0.6018	-0.6018	-0.6018	-0.6018
YNL168C	FMP41	-1.2075	-1.2075	-1.2075	-1.2075											-0.6732	-0.6732	-0.6732	-0.6732	-0.6732	-0.6732	-0.6732	-0.6732	-0.6732	-0.6732	-0.6732	-0.4061	-0.4061	-0.4061	-0.4061	-0.4061	-0.4061	-0.4061	-0.4061	-0.4061	-0.4061	-0.4061	-0.4061	-0.4061	-0.4061	-0.4061	-0.4061
YLR113W	HOG1																			-0.0322	-0.0322	-0.0322	-0.0322	-0.0322	-0.0322	-0.0322	-0.0322	-0.0322	-0.0322	-0.1755	-0.6055	-0.6055	-0.6055	-0.6055	-0.6055	-0.6055	-0.6055	-0.6055	-0.6055	-0.6055	-0.6055	-0.6055
YJR069C	HAM1	-0.0717	-0.0717	-0.0717	-0.0717	-0.0717	-0.0717	-0.0717	-0.0717	-0.0717	0.1095	0.1095	0.1095	0.1095	0.1095	0.1095	0.1095	0.1095	0.1095	0.1095	0.1095	0.1095	0.1095	0.1095	0.1095	0.1095	0.1095			-0.7367	-0.7367	-0.7367	-0.7367	-0.7367	-0.7367	-0.7367	-0.7367	-0.7367	-0.7367	-0.7367	-0.7367	-0.7367	-0.7367	0.447	0.447	0.447	0.447	0.447	0.447
YDR151C	CTH1	0.5885				-0.2121	-0.2121	-0.2121	-0.2121	-0.2121	-0.2121	-0.2121	-0.2121	-0.2121	-0.2121	-0.2121	-0.2121	-0.2121	-0.2121
YPL087W	YDC1	-0.3422	-0.3422	-0.3422	-0.3422	-0.3422	-0.3422	-0.3422	-0.3422	-0.3422	-0.3422	-0.3422	-0.1557	-0.1557	-0.1557	-0.1557	-0.1557	-0.1557	-0.1557	-0.1557	-0.1557	-0.1557	-0.1557							-0.1697	-0.1697	-0.1697	-0.1697	-0.1697	-0.1697	-0.1697	-0.1697	-0.1697	-0.1697	-0.1697	-0.1697	-0.1697	-0.1697	-0.1697	-0.1697	-0.1697	-0.1697	-0.1697
YER026C	CHO1	-0.3623	-0.3623	-0.3623	-0.3623	-0.3623	-0.3623	-0.3623	-0.3623	-0.3623	-0.3623	-0.3623	-0.3623	-0.3623	-0.3623	-0.3623	-0.3623								-1.028	-1.028	-1.028	-1.028	-1.028	-1.028	-1.028	-1.028	-1.028	-1.028	-1.028	-1.028	-1.028	-1.028
YMR214W	SCJ1	-0.0793	-0.0793	-0.4873	-0.4873	-0.4873	-0.4873	-0.4873	-0.4873	-0.4873	-0.4873	-0.4873	-0.4873	-0.4873	-0.4873	-0.4873		-0.4424	-0.4424	-0.4424	-0.4424	-0.4424	-0.4424	-0.4424	-0.4424	-0.4424	-0.4424	-0.4424	-0.4424	-0.4424	-0.4424	-0.4424	-0.4424	-0.4424	-0.4424										0.0742	0.0742	0.0742	0.0742	0.0742
YLR119W	SRN2	-0.3217	-0.3217	-0.3217					0.1859	0.1859	0.1859	0.1859	0.1859	0.1859	0.1859	0.1859	0.1859	0.1859	0.1859	0.1859	0.1859	0.1859	0.1859		-0.0108	-0.0108	-0.0108	-0.0108	-0.0108	-0.0108	-0.0108	-0.0108	-0.0108	-0.0108	-0.0108	-0.0108	-0.0108	-0.0108
YGR104C	SRB5										-0.2628	-0.2628	-0.2628	-0.2628	-0.2628	-0.2628	-0.2628	-0.2628	-0.2628	-0.2628	-0.2628	-0.2628	-0.2628	-0.2628	-0.2628	-0.3753	-0.5627	-0.5627	-0.5627	-0.5627	-0.5627	-0.5627	-0.5627	-0.5627	-0.5627	-0.5627	-0.5627	-0.5627	-0.5627	-0.5627	-0.5627	-0.5627	-0.5627
YPL186C	UIP4	-0.5007	-0.5007	-0.5007	-0.5007	-0.5007	-0.5007	-0.5007	-0.5007	-0.5007	-0.5007	-0.5007				-0.714	-0.714	-0.714	-0.714	-0.714	-0.714	-0.714	-0.714	-0.714	-0.714		-0.9641	-0.9641	-0.9641	-0.9641	-0.9641	-0.9641	-0.9641	-0.9641	-0.9641	-0.9641	-0.9641	-0.9641	-0.9641	-0.9641	-0.9641	-0.9641	-0.9641
YML100W	TSL1	-0.748	-0.748	-0.748	-0.748	-0.748	-0.748	-0.748	-0.748																									-1.1411	-1.1411	-1.1411	-1.1411	-1.1411	-1.1411	-1.1411	-1.1411	-1.1411	-1.1411	-1.1411	-1.1411
YHR089C	GAR1		0.2633	0.2633	0.2633	0.2633	0.2633	0.2633	0.2633	0.2633	0.2633	0.2633	0.2633	-0.5947	-0.5947	-0.5947	-0.5947	-0.5947	-0.5947	-0.5947	-0.5947	-0.5947	-0.5947	-0.5947	-0.5947																							0.6451	0.6451
YNL245C	CWC25	-0.4637	-0.4637	-0.4637	-0.4637	-0.4637	-0.4637							-0.2561	-0.2561	-0.2561	-0.2561	-0.2561	-0.2561	-0.2561	-0.2561	-0.2561	-0.2561	-0.8255	-0.8887	-0.8887	-0.8887	-0.8887	-0.8887	-0.8887	-0.8887	-0.8887	-0.8887	-0.8887	-0.8887	-0.8887										-0.9067	-0.9067	-0.9067	-0.9067
YKR090W	PXL1	0.284	0.284	0.284	0.284	0.284	-0.3997	-0.3997	-0.3997	-0.3997	-0.3997	-0.3997	-0.3997	-0.3997	-0.3997	-0.3997	-0.3997	-0.1464	-0.0379	-0.0379	-0.0379	-0.0379	-0.0379	-0.0379	-0.0379	-0.0379	-0.0379	-0.0379	-0.0379	-0.0379	-0.0379	-0.0379
YHR133C	NSG1			0.2221	0.2221	0.2221	0.2221	0.2221	0.2221	0.2221	0.2221	0.2221	0.2221	0.2221	0.2221	0.2221	0.2221	0.2221	0.2221	0.2221	0.2221	0.2221	0.4298	0.4298	0.4298	0.4298	0.4298	0.4298	0.4298	0.4298	0.4298	0.4298	0.4298	0.4298	0.4298	0.4298	0.4298	0.4298			-0.3612	-0.3612	-0.3612	-0.3612	-0.3612	-0.3612	-0.3612	-0.3612	-0.3612
YLR407W																										-0.7367	-0.7367	-0.7367	-0.7367	-0.7367	-0.7367	-0.7367	-0.7367	-0.7367	-0.7367	-0.7367	-0.7367	-0.7367	-0.7367	-0.7367
YJR100C					-0.7289	-0.7289	-0.7289	-0.7289	-0.7289	-0.7289	-0.7289	-0.7289	-0.7289	-0.7289	-0.7289	-0.7289	-0.7289	-0.7289	-0.7289	-0.7289	-0.7289									-0.159	-0.159	-0.159	-0.159	-0.159	-0.159	-0.159	-0.159	-0.159	-0.159	-0.159	-0.159	-0.159	-0.159	-0.159	-0.159	-0.159	-0.159	-1.0587	-1.0587
YHR062C	RPP1	-0.4133	-0.4133	-0.4133	-0.4133	-0.4133	-0.4133	-0.4133	-0.4133	-0.4133	-0.4133	-0.4133	-0.4133			-0.1674	-0.1674	-0.1674	-0.1674	-0.1674	-0.1674	-0.1674	-0.1674	-0.1674	-0.1674	-0.1674	-0.1674	-0.1674	-0.1674	-0.1674	-0.1674	-0.1674	-0.1403	-0.0322	-0.0322	-0.0322	-0.0322	-0.0322	-0.0322	-0.0322	-0.0322	-0.0322	-0.0322
YHR002W	LEU5	-0.3514	-0.3514																						-0.1411	-0.1411	-0.1411	-0.1411	-0.1411	-0.1411	-0.1411	-0.1411	-0.1411	-0.1411	-0.1411	-0.1411	-0.1411	-0.1411	-0.1411	-0.1411	-0.1411	-0.1411	-0.1411				-0.1122	-0.1122	-0.1122
YMR311C	GLC8	-0.2842	-0.2842	-0.2842	-0.2842	-0.2842		0.4153	0.4153	0.4153	0.4153	0.4153	0.4153	0.4153	0.4153	0.4153	0.4153	0.4153														-0.2711	-0.2711	-0.2711	-0.2711	-0.2711	-0.2711	-0.2711	-0.2711	-0.2711	-0.2711
YMR310C		-0.1152	-0.1152	-0.1152	-0.1152	-0.1152	-0.1905	-0.2658	-0.2658	-0.2658	-0.2658	-0.2658	-0.2658	-0.2658	-0.2658	-0.2658	-0.2658	-0.2658	-0.2658	-0.2658	-0.2658	-0.2658			-0.705	-0.705	-0.705	-0.705	-0.705	-0.705	-0.705	-0.705	-0.705	-0.705	-0.705	-0.705											0.2269	0.2269	0.2269
YPL010W	RET3		0.1736	0.1736	0.1736	0.1736	0.1736	0.1736	0.1736	0.1736	0.1736	0.1736	0.1736	0.1736	0.1736	0.1736	0.1736	0.1736	0.1736	0.1736	0.1736	0.023	0.023	0.023	0.023	0.023	0.023	0.023	0.023	0.023	0.023	0.023	0.023	0.023	0.023			-0.0587	-0.0587	-0.0587	-0.0587	-0.0587	-0.0587	-0.0587	-0.0587	-0.0587	-0.0587	-0.0587	-0.0587
YCR090C					-0.0354	-0.0354	-0.0354	-0.0354	-0.0354	-0.0354	-0.0354	-0.0354	-0.0354	-0.0354	-0.0354	-0.0354	-0.0354	-0.0354	-0.0354																														-0.4822
YPL239W	YAR1	-1.4212	-1.4212												-0.6909	-0.6909	-0.6909	-0.6909	-0.6909	-0.6909	-0.6909	-0.6909	-0.6909	-0.6909	-0.6909	-0.6909	-0.6909
YNL051W	COG5	-0.6191					-0.2947	-0.2947	-0.2947	-0.2947	-0.2947	-0.2947	-0.2947	-0.2947	-0.2947	-0.2947	-0.2947																															0.2189	0.2189
YKL094W	YJU3	0.2226	0.2226	0.2226	0.2226	0.2226	-0.376	-0.6326	-0.6326	-0.6326	-0.6326	-0.6326	-0.6326	-0.6326	-0.6326	-0.6326	-0.6326	-0.6326	-0.6326											-0.3217	-0.3217	-0.3217	-0.3217	-0.3217	-0.3217	-0.3217	-0.3217	-0.3217	-0.3217	-0.3217	-0.3217	-0.3217	-0.3217	-0.3217	-0.3217	-0.3217			-0.1016
YLR063W		-0.4168	-0.4168	-0.4168	-0.4168	-0.8396	-1.1214	-1.1214	-1.1214	-1.1214	-1.1214	-1.1214	-1.1214	-1.1214	-1.1214	-1.1214	-1.1214	-1.1214	-1.1214	-1.1214	-1.1214	-1.1214	-1.1214
YPL267W	ACM1				-0.2148	-0.2148	-0.2148	-0.2148	-0.2148	-0.2148	-0.2148	-0.2148	-0.2148	-0.2148	-0.2148	-0.2148										0.1219	0.1219	0.1219	0.1219	0.1219	0.1219	0.1219	0.1219	0.1219	0.1219	0.1219	0.1219	0.1219	0.1219	0.1219	0.1219	0.1219	0.1219						-0.4916
YEL047C		-0.6284	-0.6284	-0.6284	-0.6284	-0.6284				-0.1238	-0.1238	-0.1238	-0.1238	-0.1238	-0.1238	-0.1238	-0.1238	-0.1238	-0.1238	-0.1238	-0.1238	-0.1238	-0.1238																									-0.5609	-0.5609
YPR071W		-0.7912	-0.7912	-0.7912	-0.7912	-0.7912	-0.7912	-0.7912	-0.7912	-0.7912	-0.7912	-0.7912	-0.7912	-0.7912	-0.7912		-0.4148	-0.4148	-0.4148	-0.4148	-0.4148	-0.4148	-0.4148	-0.4148	-0.4148	-0.4148	-0.4148	-0.4148				0.0002	0.0002	0.0002	0.0002	0.0002	0.0002	0.0002	0.0002	0.0002	0.0002	0.0002	0.0002	0.0002	0.0002	-0.4395	-0.4395	-0.4395	-0.4395
YPL034W				0.0933	0.0933	0.0933	0.0933	0.0933	0.0933	0.0933	0.0933	0.0933	0.0933	0.0933																										0.3642	0.3642	0.3642	0.3642	0.3642	0.3642	0.3642	0.3642	0.3642	0.3642
YOR308C	SNU66
YDR506C																																																	-0.4195
YGL043W	DST1	0.2121	0.2121	0.2121	0.2121	0.2121	0.2121	0.2121	0.2121	0.2121	0.2121	0.2121	0.2121	0.2121	0.2121				0.4774	0.4774	0.4774	0.4774	0.4774	0.4774	0.4774	0.4774	0.4774	0.4774	0.4774	0.4774	0.4774	0.4774	0.4774	0.4774	0.4774	0.4774											-0.0943	-0.0943	-0.0943
YLR368W	MDM30								-0.2628	-0.2628	-0.2628	-0.2628	-0.2628	-0.2628	-0.2628	-0.2628	-0.2628	-0.2628	-0.2628	-0.2628	-0.2628	-0.2628	-0.2628	-0.2628	-0.2628	-0.2628	-0.6459	-0.6885	-0.6885	-0.6885	-0.6885	-0.6885	-0.6885	-0.6885	-0.6885	-0.6885	-0.6885
YML052W	SUR7																		-1.1373	-1.1373	-1.1373	-1.1373	-1.1373	-1.1373	-1.1373	-1.1373	-1.1373	-1.1373	-1.1373	-1.1373	-1.1373	-1.1373	-1.1373	-1.1373	-1.1373
YOR057W	SGT1	0.1747	0.1747	0.1747	0.1747	0.1747	0.1747	0.1747	0.1747	0.1747	0.1747											-0.2062	-0.2062	-0.2062	-0.2062	-0.2062	-0.2062	-0.2062	-0.2062	-0.2062	-0.2062	-0.2062	-0.2062	-0.2062	-0.2062	-0.2062	-0.2062	-0.2062	-0.2062	-0.2062								-0.4916	-0.4916
YGR148C	RPL24B	-1.5181	-1.5181	-1.5181	-1.5181	-1.5181	-1.5181	-1.5181	-1.5181	-1.5181	-1.5181	-1.5181	-1.5181	-1.5181																																			-0.6482
YHR171W	ATG7		-0.2658	-0.2658	-0.2658	-0.2658	-0.2658	-0.2658	-0.2658	-0.2658	-0.2658	-0.2658	-0.2658	-0.2658	-0.2658	-0.2658	-0.2658	-0.2658	-0.2658							-0.4685	-0.4685	-0.4685	-0.4685	-0.4685	-0.4685	-0.4685	-0.4685	-0.4685	-0.4685	-0.4685	-0.4685												-0.4437
YOR077W	RTS2	0.5	0.5	0.5	0.5	0.5	0.5	0.5	0.5	0.5	0.5	0.5	0.5	0.5	0.5				0.4047	0.4047	0.4047	0.4047	0.4047	0.4047	0.4047	0.4047	0.4047	0.4047	0.4047	0.4047	0.4047	0.4047	0.4047	0.4047	0.4047												-0.0645	-0.0645	-0.0645
YIL049W	DFG10	-0.2957	-0.2957	-0.2957							-0.8797	-0.8797	-0.8797	-0.8797	-0.8797	-0.8797	-0.8797	-0.8797	-0.8797	-0.8797	-0.8797
YDR336W		-0.2121	-0.2121	-0.2121	-0.2121	-0.2121	-0.2121	-0.2121	-0.2121	-0.2121	-0.2121	-0.2121	-0.2121	-0.2121	-0.2121		-0.6284	-0.6284	-0.6284	-0.6284	-0.6284	-0.6284	-0.6284	-0.6284	-0.6284	-0.6284	-0.6284	-0.6284													0.0616	0.0616	0.0616	0.0616	0.0616	0.0616	0.0616	0.0616	0.0616
YJL091C	GWT1	0.0085	0.0085	0.0085	0.0085	0.0085	0.0085	0.0085	0.023	0.023	0.023	0.023	0.023	0.023	0.023	0.023	0.023	0.023	0.023	0.023	0.023	0.0037	-0.1697	-0.1697	-0.1697	-0.1697	-0.1697	-0.1697	-0.1697	-0.1697	-0.1697	-0.1697	-0.1697	-0.1697	-0.1697	-0.1697	-0.1697	-0.1697	-0.1697	-0.1697
YDR054C	CDC34																					-0.6587	-0.6587	-0.6587	-0.6587	-0.6587	-0.6587	-0.6587	-0.6587	-0.6587	-0.6587	-0.6587	-0.6587	-0.6587	-0.6587	-0.6587	-0.6587	-0.6587	-0.6587	-0.6587
YER120W	SCS2	-0.451	-0.451	-0.451	-0.451	-0.451	-0.451	-0.451	-0.451	-0.451	-0.451	-0.451	-0.451	-0.451			-0.496	-0.496	-0.496	-0.496	-0.496	-0.496	-0.496	-0.496	-0.496	-0.496	-0.496	-0.496	-0.496	-0.496	-0.496	-0.496	-0.496														-0.5544	-0.5544	-0.5544
YKL049C	CSE4	-0.5181	-0.5181	-0.5181	-0.5181	-0.5181	-0.5181	-0.5181	-0.5181	-0.5181	-0.5181			-0.3938	-0.3938	-0.3938	-0.3938	-0.3938	-0.3938	-0.3938	-0.3938	-0.3938	-0.3938	-0.3938	-0.3938	-0.3938	-0.3938	-0.3938												0.5597	0.5597	0.5597	0.5597	0.5597	0.5597	0.5597	0.5597	0.5597	0.5597
YCR036W	RBK1	0.0849	0.0849	0.0849	0.0849	0.0849	0.0849	0.0849	0.0849								0.0933	0.0933	0.0933	0.0933	0.0933	0.0933	0.0933	0.0933	0.0933	0.0933	0.0933	0.0933	0.0933	0.0933	0.0933	0.0933
YOL056W	GPM3	-0.3217	-0.3217	-0.3217	-0.3217	-0.328	-0.3534	-0.3534	-0.3534	-0.3534	-0.3534	-0.3534	-0.3534	-0.3534	-0.3534	-0.3534	-0.3534	-0.3534	-0.3534	-0.3534	-0.3534	-0.3534	-0.3534									0.0193	0.0193	0.0193	0.0193	0.0193	0.0193	0.0193	0.0193	0.0193	0.0193	0.0193							-0.5143
YLR128W	DCN1	0.9382	0.9382	0.9382	0.9382	0.9382	0.9382	0.9382	0.9382	0.9382	0.9382	0.9382	0.9382	0.9382	0.9382		0.132	0.132	0.132	0.132	0.132	0.132	0.132	0.132	0.132	0.132	0.132	0.132	0.132	0.132	0.132	0.132	0.132						0.8326	0.8326	0.8326	0.8326	0.8326	0.8326	0.8326	0.8326	0.8326	0.8326	0.8326
YLR068W	FYV7	0.3012	0.0872	-0.0733	-0.0733	-0.0733	-0.0733	-0.0733	-0.0733	-0.0733	-0.0733	-0.0733	-0.0733	-0.0733	-0.0733	-0.0733	-0.0733	-0.0733	-0.0733	-0.0733		0.132	0.132	0.132	0.132	0.132	0.132	0.132	0.132	0.132	0.132	0.132	0.132	0.132	0.132	0.132	0.132	0.132											-0.2148
YBR104W	YMC2	-0.3217	-0.3217	-0.3217	-0.3217	-0.3217	-0.3217	-0.3217	-0.3217						-0.5627	-0.5627	-0.5627	-0.5627	-0.5627	-0.5627	-0.5627	-0.5627	-0.5627	-0.5627	-0.5627					0.2377	0.2377	0.2377	0.2377	0.2377	0.2377	0.2377	0.2377	0.2377	0.2377	0.2377	0.2377	0.2377	0.2377	0.2377	0.2377
YBR045C	GIP1	0.3846	0.3846	0.3846	0.3846	0.3846	0.3846	0.3846	0.3846	0.3846	0.3846	0.3846	0.3846	0.3846		-0.1477	-0.1477	-0.1477	-0.1477	-0.1477	-0.1477	-0.1477	-0.1477	-0.1477	-0.1477	-0.1477	-0.1477	-0.1477	-0.1477	-0.1477	-0.1477	-0.1477																-0.3806	-0.3806
YNL079C	TPM1	-0.5332	-0.5332	-0.5332	-0.5332	-0.5332	-0.608	-0.9822	-0.9822	-0.9822	-0.9822	-0.9822	-0.9822	-0.9822	-0.9822	-0.9822	-0.9822	-0.9822	-0.9822	-0.9822	-0.9822	-0.9822	-0.9822	-0.9822			-0.5485	-0.5485	-0.5485	-0.5485	-0.5485	-0.5485	-0.5485	-0.5485	-0.5485	-0.5485	-0.5485	-0.5485	-0.5485	-0.5485
YER030W	CHZ1	-0.5441	-0.5441	-0.5441	-0.5441	-0.5441	-0.5441	-0.5441	-0.5441	-0.5441	-0.5441	-0.5441	-0.5441	-0.5441		-0.4916	-0.4916	-0.4916	-0.4916	-0.4916	-0.4916	-0.4916	-0.4916	-0.4916	-0.4916	-0.4916		-0.9384	-0.9384	-0.9384	-0.9384	-0.9384	-0.9384	-0.9384	-0.9384	-0.9384	-0.9384	-0.9384	-0.9384	-0.9384	-0.9384	-0.9384
YDL219W	DTD1	0.6217	0.6217	0.6217		-0.2477	-0.2477	-0.2477	-0.2477	-0.2477	-0.2477	-0.2477	-0.2477	-0.2477	-0.2477	-0.2477	-0.2477	-0.2477	-0.2477	-0.2477	-0.2477	-0.2477	-0.2477	-0.3393	-0.553	-0.553	-0.553	-0.553	-0.553	-0.553	-0.553	-0.553	-0.553	-0.553	-0.553	-0.553	-0.553	-0.553	-0.1102	-0.1102	-0.1102	-0.1102	-0.1102	-0.1102	-0.1102	-0.1102	-0.1102	-0.1102
YNL100W		0.1929	0.1929						-0.8319	-0.8319	-0.8319	-0.8319	-0.8319	-0.8319	-0.8319	-0.8319	-0.8319	-0.8319	-0.8319	0.0538	0.0538	0.0538	0.0538	0.0538	0.0538	0.0538	0.0538	0.0538	0.0538	0.0538
YBR257W	POP4	-0.3217	-0.3217	-0.3217	-0.3217	-0.3217	-0.3217	-0.3217	-0.3217	-0.3217	-0.3217	-0.3217													0.1113	0.1113	0.1113	0.1113	0.1113	0.1113	0.1113	0.1113	0.1113	0.1113	0.1113	0.1113	0.1113	0.1113	0.1113
YGR028W	MSP1																																														-0.6265	-0.6265	-0.6265
YPL090C	RPS6A	-1.7547	-1.7547	-1.7547	-1.7547	-1.7547
YDR021W	FAL1	0.0345	0.0345											-0.3541	-0.3541	-0.3541	-0.3541	-0.3541	-0.3541	-0.3541	-0.3541	-0.3541	-0.3541	-0.3541			0.0602	0.0602	0.0602	0.0602	0.0602	0.0602	0.0602	0.0602	0.0602	0.0602	0.0602	0.0602
YDL150W	RPC53	0.2714	0.2525	0.2525	0.2525	0.2525	0.2525	0.2525	0.2525	0.2525	0.2525	0.2525	0.2525	0.2525	0.2525	0.2525	0.2525	0.2525			-0.2692	-0.2692	-0.2692	-0.2692	-0.2692	-0.2692	-0.2692	-0.2692	-0.2692	-0.2692
YER117W	RPL23B	0.1721	0.1721	0.1721	0.1721	0.1721	0.1721	0.1721	0.1721	0.1721	0.1721	0.1721	0.1721	0.1721
YMR266W	RSN1																															-0.4092	-0.4092	-0.4092	-0.4092	-0.4092	-0.4092	-0.4092	-0.4092	-0.4092	-0.4092	-0.4092	-0.4092	-0.4092	-0.4092	-0.4092	-0.4092	-0.6696	-0.6696
YOR193W	PEX27
YOR090C	PTC5	-0.0437	-0.0437	-0.0437	-0.0437	-0.0437	-0.0437						0.2453	0.2453	0.2453	0.2453	0.2453	0.2453	0.2453	0.2453	0.2453	0.2453	0.2453	0.2453	0.2453	0.2453	0.2453	0.2453	0.2453	0.2453	0.2453											-0.3806	-0.3806	-0.3806	-0.3806	-0.3806	-0.3806	-0.3806	-0.3806
YDL098C	SNU23	-0.3896			-0.4883	-0.4883	-0.4883	-0.4883	-0.4883	-0.4883	-0.4883	-0.4883	-0.4883	-0.4883	-0.4883	-0.4883	-0.4883	-0.5804	-0.5804	-0.5804	-0.5804	-0.5804	-0.5804	-0.5804	-0.5804	-0.5804	-0.5804	-0.5804	-0.5804																			-0.4622	-0.4622
YLR022C	SDO1
YBL042C	FUI1																																															-0.3623	-0.3623
YHR151C	MTC6	0.2453	0.2453	0.2453	0.2453	0.2453	0.2453	0.2453	0.2453	0.2453				-0.2014	-0.2014	-0.2014	-0.2014	-0.2014	-0.2014	-0.2014	-0.2014	-0.2014	-0.2014	-0.2014	-0.2014	-0.2014	-0.2014	-0.2014	-0.2014
YCR009C	RVS161				-0.9432	-0.9432	-0.9432	-0.9432	-0.9432	-0.9432	-0.9432	-0.9432	-0.9432	-0.9432	-0.9432	-0.9432	-0.9432	-0.9432	-0.9432	-0.9432	-0.9432	-0.9432	-0.9432	-0.9807	-0.9807	-0.9807	-0.9807	-0.9807	-0.9807	-0.9807	-0.9807	-0.9807	-0.9807	-0.9807	-0.9807	-0.9807	-0.9807	-0.9807	-0.9807
YHL021C		0.1731	0.1731	0.1731	0.1731	0.1731	0.1731	0.1731	0.1344	0.1344	0.1344	0.1344	0.1344	0.1344	0.1344	0.1344	0.1344	0.1344	0.1344	0.1344	0.1344	0.1344	0.1344															-0.0348	-0.0348	-0.0348	-0.0348	-0.0348	-0.0348	-0.0348	-0.0348	-0.0348	-0.0348	-0.0348	-0.0348
YHR049W	FSH1	-0.2125	-0.2125	-0.2125	-0.2125	-0.2125	-0.2125	-0.3735	-0.3735	-0.3735	-0.3735	-0.3735	-0.3735	-0.3735	-0.3735	-0.3735	-0.3735	-0.3735	-0.3735	-0.3735	-0.3735	-0.3735	-0.3735	-0.3735	-0.3735																				0.4041	0.4041	0.4041	0.4041	0.4041
YDL198C	GGC1		-0.7222	-0.7222	-0.7222	-0.7222	-0.7222	-0.7222	-0.7222	-0.7222	-0.7222	-0.7222	-0.7222			-0.7566	-0.7566	-0.7566	-0.7566	-0.7566	-0.7566	-0.7566	-0.7566	-0.7566	-0.7566		-0.7578	-0.7578	-0.7578	-0.7578	-0.7578	-0.7578	-0.7578	-0.7578	-0.7578	-0.7578	-0.7578	-0.7578							-0.6436	-0.6436	-0.6436	-0.6436	-0.6436
YMR106C	YKU80																										-0.6265	-0.6265	-0.6265	-0.6265	-0.6265	-0.6265	-0.6265	-0.6265	-0.6265	-0.6265	-0.6265	-0.6265	-0.6265	-0.6265
YKL108W	SLD2	-0.9641	-0.9641	-0.9641	-0.9641	-0.9641	-0.9641
YPL200W	CSM4											-0.3661	-0.3661	-0.3661	-0.3661	-0.3661	-0.3661	-0.3661	-0.3661	-0.3661	-0.3661	-0.3661	0.0602	0.0602	0.0602	0.0602	0.0602	0.0602	0.0602	0.0602	0.0602	0.0602	0.0602	0.0602	0.0602	0.0602	0.0602	0.0602	0.0602	0.0088	-0.0168	-0.0168	-0.0168	-0.0168	-0.0168	-0.0168	-0.0168	-0.0168	-0.0168
YDL110C	TMA17	-0.6213	-0.6213	-0.6213	-0.6213	-0.6213	-0.6213	-0.6213	-0.6213	-0.6213	-0.6213									-0.7951	-0.7951	-0.7951	-0.7951	-0.7951	-0.7951	-0.7951	-0.7951	-0.7951	-0.7951	-0.7951	-0.7951	-0.3626	-0.1773	-0.1773	-0.1773	-0.1773	-0.1773	-0.1773	-0.1773	-0.1773	-0.1773	-0.1773	-0.1773	-0.1773	-0.1773	-0.3723	-0.3723	-0.3723	-0.3723
YBR249C	ARO4	-0.58	-0.58	-0.58	-0.58	-0.58	-0.58	-0.58						-0.6983	-0.6983	-0.6983	-0.6983	-0.6983	-0.6983	-0.6983	-0.6983	-0.6983	-0.6983	-0.6983	-0.6983	-0.5562	-0.5562	-0.5562	-0.5562	-0.5562	-0.5562	-0.5562	-0.5562	-0.5562	-0.5562	-0.5562
YGL068W	MNP1					0.1637	0.1637	0.1637	0.1637	0.1637	0.1637	0.1637	0.1637	0.1637	0.1637	0.1637	0.1637	0.1637	0.1637	0.1637							0.1637	0.1637	0.1637	0.1637	0.1637	0.1637	0.1637	0.1637	0.1637	0.1637	0.1637	0.1637	0.1637								-0.0538	-0.0538	-0.0538
YPR013C		-1.1182	-1.1182	-1.1182	-1.1182	-1.1182	-1.1182	-1.1182	-1.1182	-1.2832	-1.2832	-1.2832	-1.2832	-1.2832	-1.2832	-1.2832	-1.2832	-1.2832	-1.2832	-1.2832	-1.2832	-1.2832	-1.2832	-1.2832						-1.4113	-1.4113	-1.4113	-1.4113	-1.4113	-1.4113	-1.4113	-1.4113	-1.4113	-1.4113	-1.4113	-1.4113	-1.4113	-1.4113					-0.5143	-0.5143
YLR380W	CSR1	-0.5645	-0.5645	-0.5645	-0.5645	-0.5645										-1.9193	-1.9193	-1.9193	-1.9193	-1.9193	-1.9193	-1.9193	-1.9193	-1.9193	-1.9193	-1.9193	-1.9193	-1.9193	-1.9193	-1.9193	-1.9193	-1.9193	-1.9193	-1.6072	-0.8269	-0.8269	-0.8269	-0.8269	-0.8269	-0.8269	-0.8269	-0.8269	-0.8269	-0.8269	-0.8269	-1.4248	-1.4248	-1.4248	-1.4248
YDR256C	CTA1		0.293	0.293	0.293	0.293	0.293	0.293	0.293	0.293	0.293	0.293	0.293	-0.0262	-0.0262	-0.0262	-0.0262	-0.0262	-0.0262	-0.0262	-0.0262	-0.0262	-0.0262	-0.0262	-0.0262	-0.0262	-0.0262	-0.0262	-0.0262	-0.0262	-0.0262	-0.1884	-0.1884	-0.1884	-0.1884	-0.1884	-0.1884	-0.1884	-0.1884	-0.1884	-0.1884	-0.1884	-0.1884	-0.1884	-0.1884	-0.1884	-0.1884		-0.0587
YEL056W	HAT2	0.1189	0.1189	0.1189	0.1189	0.1189	0.1189	0.1189	0.1189	0.1189	-0.1557	-0.1557	-0.1557	-0.1557	-0.1557	-0.1557	-0.1557	-0.1557	-0.1557	-0.1557	-0.1557	-0.1557	-0.1557	-0.1557	-0.1557	-0.1557	-0.1557						0.2377	0.2377	0.2377	0.2377	0.2377	0.2377	0.2377	0.2377	0.2377	0.2377	0.2377	0.2377	0.2377	0.2377
YNL281W	HCH1	-0.9591	-0.9591	-0.9591	-0.6382	-0.4243	-0.4243	-0.4243	-0.4243	-0.4243	-0.4243	-0.4243	-0.4243	-0.4243	-0.4243	-0.4243	-0.4243	-0.4445	-0.5656	-0.5656	-0.5656	-0.5656	-0.5656	-0.5656	-0.5656	-0.5656	-0.5656	-0.5656	-0.5656	-0.5656	-0.5656	-0.5656	-0.5656	-0.5656	-0.5656	-0.5656												-0.3217	-0.3217
YML087C		-0.2974	-0.2974	-0.2974	-0.2974	-0.2974	-0.2974	-0.2974									-0.7367	-0.7367	-0.7367	-0.7367	-0.7367	-0.7367	-0.7367	-0.7367	-0.7367	-0.7367	-0.7367	-0.7367	-0.7367						-0.129	-0.129	-0.129	-0.129	-0.129	-0.129	-0.129	-0.129	-0.129	-0.129	-0.129	-0.129	-0.129	-0.129	-0.129
YBR085W	AAC3																																																-0.2062
YKR006C	MRPL13	-0.5512	-0.5512	-0.5512	-0.5512								0.3365	0.3365	0.3365	0.3365	0.3365	0.3365	0.3365	0.3365	0.3365	0.3365	0.2764	0.1362	0.1362	0.1362	0.1362	0.1362	0.1362	0.1362	0.1362	0.1362	0.1362	0.1362	0.1362	0.1362	0.1362											-0.0177	-0.0177
YMR090W		0.7461	0.7461	0.7461	0.7461		0.0219	0.0219	0.0219	0.0219	0.0219	0.0219	0.0219	0.0219	0.0219	0.0219	0.0219	0.0219	0.0219	0.0219				-0.2408	-0.2408	-0.2408	-0.2408	-0.2408	-0.2408	-0.2408	-0.2408	-0.2408	-0.2408	-0.2408	-0.2408	-0.2408	-0.2408	-0.2408	-0.2408	-0.2408			-0.3217	-0.3217	-0.3217	-0.3217	-0.3217	-0.3217	-0.3217
YIL018W	RPL2B	-0.0085	-0.0085
YGL076C	RPL7A	-1.7623	-1.7623	-1.7623	-1.7623	-1.7623	-1.7623	-1.7623	-0.3217	-0.3217	-0.3217	-0.3217	-0.3217	-0.3217	-0.3217	-0.3217	-0.3217	-0.3217	-0.3217	-0.3217
YJL126W	NIT2	-0.0587	-0.0587			0.3846	0.3846	0.3846	0.3846	0.3846	0.3846	0.3846	0.3846	0.3846	0.3846	0.3846	0.6965	0.6965	0.6965	0.6965	0.6965	0.6965	0.6965	0.6965	0.6965	0.6965	0.6965	0.6965		0.4015	0.4015	0.4015	0.4015	0.4015	0.4015	0.4015	0.4015	0.4015	0.4015	0.4015	0.4015						-0.2148	-0.2148	-0.2148
YDR475C	JIP4						-0.6473	-0.6473	-0.6473	-0.6473	-0.6473	-0.6473	-0.6473	-0.6473	-0.6473	-0.6473	-0.6473	-0.6473	-0.6473	-0.6473	-0.6473	-0.6473	-0.6473	-0.6473	-0.6473					-1.0766	-1.0766	-1.0766	-1.0766	-1.0766	-1.0766	-1.0766	-1.0766	-1.0766	-1.0766	-1.0766	-1.0766
YLR017W	MEU1	0.0033	0.0033	0.0033	0.0033	0.0033	0.0033							-0.1815	-0.1815	-0.1815	-0.1815	-0.1815	-0.1815	-0.1815	-0.1815	-0.1815	-0.1815	-0.1815	-0.1815	-0.1815	-0.1815	-0.1815	-0.1815	0.0968	0.0968	0.0968	0.0968	0.0968	0.0968	0.0968	0.0968	0.0968	0.0968	0.0968	0.0968	0.0968	0.0968	0.0968
YLR077W	FMP25	-0.6885	-0.6885	-0.6885	-0.6885	-0.6885	-0.6885									-0.7261	-0.7261	-0.7261	-0.7261	-0.7261	-0.7261	-0.7261	-0.7261	-0.7261	-0.7261	-0.7261	-0.7261	-0.7261	-0.7261	-0.7261	-0.7261	-0.7261																-0.2014	-0.2014
YJL124C	LSM1	-0.2728	-0.2728	-0.2728		-0.631	-0.631	-0.631	-0.631	-0.631	-0.631	-0.631	-0.631	-0.631	-0.631	-0.631	-0.631			-0.8036	-0.8036	-0.8036	-0.8036	-0.8036	-0.8036	-0.8036	-0.8036	-0.8036	-0.8036	-0.8036	-0.8036	-0.8036	-0.8036	-0.0461	-0.0461	-0.0461	-0.0461	-0.0461	-0.0461	-0.0461	-0.0461	-0.0461	-0.0461	-0.0461		-0.812	-0.812	-0.812	-0.812
YMR021C	MAC1	-0.1518		-0.2222	-0.2222	-0.2222	-0.2222	-0.2222	-0.2222	-0.2222	-0.2222	-0.2222	-0.2222	-0.2222	-0.2222	-0.2222	-0.2222	-0.2222	-0.2222	-0.2222	0.1552	0.1552	0.1552	0.1552	0.1552	0.1552	0.1552	0.1552	0.1552	0.1552	0.1552	0.1552	0.1634	0.2285	0.2285	0.2285	0.2285	0.2285	0.2285	0.2285	0.2285	0.2285	0.2285			0.0073	0.0073	0.0073	0.0073
YIL153W	RRD1	0.1377	0.1377	0.1377	0.1377	0.1377	-0.3217	-0.3217	-0.3217	-0.3217	-0.3217	-0.3217	-0.3217	-0.3217	-0.3217	-0.3217	-0.3217	-0.3217	-0.3217	-0.3217	-0.3217	-0.3217			0.0933	0.0933	0.0933	0.0933	0.0933	0.0933	0.0933	0.0933	0.0933	0.0933	0.0933	0.0933	0.0933	0.0933	0.0933	0.0933	0.0933
YDR516C	EMI2	-0.2197	-1.2869	-1.2869	-1.2869	-1.2869	-1.2869	-1.2869	-1.2869	-1.2869	-1.2869	-1.2869	-1.2869	-1.2869	-1.2869	-1.2869	-1.2869	-1.2869	-1.2869	-1.2869												-1.3761	-1.3761	-1.3761	-1.3761	-1.3761	-1.3761	-1.3761	-1.3761	-1.3761	-1.3761	-1.3761	-1.3761	-1.3761	-1.3761	-1.3761	-1.3761	-1.3761
YPL096W	PNG1	-0.0322	-0.0322	-0.0322									0.2442	0.2442	0.2442	0.2442	0.2442	0.2442	0.2442	0.2442	0.2442	0.2442	0.2442	0.2442	0.2442	0.2442		0.3829	0.3829	0.3829	0.3829	0.3829	0.3829	0.3829	0.3829	0.3829	0.3829	0.3829											-0.1997
YML050W		-0.299	-0.299	-0.299	-0.299	-0.2338	-0.2265	-0.2265	-0.2265	-0.2265	-0.2265	-0.2265	-0.2265	-0.2265	-0.2265	-0.2265	-0.134	-0.1238	-0.1238	-0.1238	-0.1238	-0.1238	-0.1238	-0.1238	-0.1238	-0.1238	-0.1238	-0.1238	-0.1238	-0.1238	-0.1238	-0.1238	-0.1238	-0.1238	-0.0379	-0.0379	-0.0379	-0.0379	-0.0379	-0.0379	-0.0379	-0.0379	-0.0379	-0.0379	-0.0379	-0.0379
YKR026C	GCN3	0.1281	0.1281	0.1281	0.1281													-0.0262	-0.0262	-0.0262	-0.0262	-0.0262	-0.0262	-0.0262	-0.0262	-0.0262	-0.0262	-0.0262	-0.0262						-0.0587	-0.0587	-0.0587	-0.0587	-0.0587	-0.0587	-0.0587	-0.0587	-0.0587	-0.0587	-0.0587	-0.0587
YBR222C	PCS60	-1.0587	-1.0587	-1.0587	-1.0587	-1.0587	-1.0587												-1.0136	-1.0136	-1.0136	-1.0136	-1.0136	-1.0136	-1.0136	-1.0136	-1.0136	-1.0136	-1.0136	-1.0136	-1.0136	-1.0136	-1.0136	-1.0136	-1.0136													-0.6891	-0.6891
YKL204W	EAP1	-0.5918	-0.5918	-0.5918									0.7563	0.7563	0.7563	0.7563	0.7563	0.7563	0.7563	0.7563	0.7563	0.7563	0.7563	0.7563	0.7563			-0.1152	-0.1152	-0.1152	-0.1152	-0.1152	-0.1152	-0.1152	-0.1152	-0.1152	-0.1152	-0.1152										0.02	0.02
YOL011W	PLB3	-0.5847	-0.5847	-0.5847																								-0.9347	-0.9347	-0.9347	-0.9347	-0.9347	-0.9347	-0.9347	-0.9347	-0.9347	-0.9347	-0.9347	-0.7002	-0.7002	-0.7002	-0.7002	-0.7002	-0.7002	-0.7002	-0.7002	-0.7002	-0.7002	-0.7002
YPL077C				0.2542	0.2542	0.2542	0.2542	0.2542	0.2542	0.2542	0.2542	0.2542	0.2542	0.2542	0.2542	0.2542	0.2542	0.2542	0.2542	0.2542	0.2542		-0.0247	-0.0247	-0.0247	-0.0247	-0.0247	-0.0247	-0.0247	-0.0247	-0.0247	-0.0247	-0.0247	-0.0247															0.3727
YDR069C	DOA4	-0.051	-0.051	-0.051	-0.051	-0.051	-0.051	-0.051	-0.051	-0.051	-0.051	-0.051	-0.051	-0.051	-0.051	-0.051	-0.051	-0.051	-0.063	-0.1049	-0.1049	-0.1049	-0.1049	-0.1049	-0.1049	-0.1049	-0.1049	-0.1049	-0.1049																		-0.7847	-0.7847	-0.7847
YMR201C	RAD14						-0.2298	-0.2298	-0.2298	-0.2298	-0.2298	-0.2298	-0.2298	-0.2298	-0.2298	-0.2298	-0.2298	-0.2298	-0.2298	-0.2298										0.1377	0.1377	0.1377	0.1377	0.1377	0.1377	0.1377	0.1377	0.1377	0.1377	0.1377	0.1377	0.1377	0.1377	0.1377	0.1377	0.1377	0.1377	0.1377
YKR027W	BCH2	-0.2342	-0.2342	-0.2342	-0.2342	-0.2342	-0.2342	-0.2342	-0.2342	-0.2342	-0.2342	-0.2342	-0.2342	-0.2342																					-1.0738	-1.0738	-1.0738	-1.0738	-1.0738	-1.0738	-1.0738	-1.0738	-1.0738	-1.0738	-1.0738	-1.0738	-1.0738	-1.0738	-1.0738
YGR212W	SLI1	-0.0934	-0.0934	-0.0934	-0.0934			-0.71	-0.71	-0.71	-0.71	-0.71	-0.71	-0.71	-0.71	-0.71	-0.71	-0.71	-0.71	-0.71	-0.71	-0.71	-0.71	-0.8692	-0.8692	-0.8692	-0.8692	-0.8692	-0.8692	-0.8692	-0.8692	-0.8692	-0.8692	-0.8692
YFR044C	DUG1	0.562	0.562	0.562	0.562			-0.3217	-0.3217	-0.3217	-0.3217	-0.3217	-0.3217	-0.3217	-0.3217	-0.3217	-0.3217	-0.3217	-0.3217	-0.3217	-0.3217	-0.3217	-0.3217	0.0857	0.0857	0.0857	0.0857	0.0857	0.0857	0.0857	0.0857	0.0857	0.0857	0.0857	0.0857	0.0857	0.0857	0.0857
YPR154W	PIN3	-0.4115	-0.4115	-0.4115	-0.4115	-0.4115	-0.4115	-0.4115			0.4208	0.4208	0.4208	0.4208	0.4208	0.4208	0.4208	0.4208	0.4208	0.4208	0.4208	0.4208			-0.0807	-0.0807	-0.0807	-0.0807	-0.0807	-0.0807	-0.0807	-0.0807	-0.0807	-0.0807	-0.0807	-0.0807	-0.0807									0.153	0.153	0.153	0.153
YKL218C	SRY1	-0.3497	-0.3497	-0.3497	-0.3497	-0.3497	-0.3497	-0.3497	-0.3497	-0.3497	-0.3497	-0.3497	-0.3497					0.2258	0.2258	0.2258	0.2258	0.2258	0.2258	0.2258	0.2258	0.2258	0.2258	0.2258	0.2258	0.2258	0.2258	0.2258	0.2258	0.2258	0.2258	0.2258													-0.442
YER183C	FAU1	0.6572	0.6572	0.6435	0.5196	0.5196	0.5196	0.5196	0.5196	0.5196	0.5196	0.5196	0.5196	0.3889	0.1929	0.1929	0.1929	0.1929	0.1929	0.1929	0.1929	0.1929	0.1929	0.1929	-0.3396	-0.3396	-0.3396	-0.3396	-0.3396	-0.3396	-0.3396	-0.3396	-0.3396	-0.3396	-0.3396	-0.3396	-0.3396	-0.3396	-0.3396	-0.3396	-0.3396	-0.3396
YHR168W	MTG2	0.0076	0.0076	0.0076	0.0076	0.1932	0.286	0.286	0.286	0.286	0.286	0.286	0.286	0.286	0.286	0.286	0.286	0.286	0.286	0.286	0.286	0.286	0.286	-0.253	-0.253	-0.253	-0.253	-0.253	-0.253	-0.253	-0.253	-0.253	-0.253	-0.253	-0.253	-0.253	-0.253	-0.0363	-0.0363	-0.0363	-0.0363	-0.0363	-0.0363	-0.0363	-0.0363	-0.0363	-0.0363	-0.0363	-0.0363
YML108W		-0.484			-0.6646	-0.6646	-0.6646	-0.6646	-0.6646	-0.6646	-0.6646	-0.6646	-0.6646	-0.6646	-0.6646	-0.6646	-0.6646	-0.6646	-0.6646	-0.6646	-0.6646	-0.6646	-0.6646					-0.3976	-0.3976	-0.3976	-0.3976	-0.3976	-0.3976	-0.3976	-0.3976	-0.3976	-0.3976	-0.3976	-0.3976										0.2824
[truncated: 3,211 more rows]
[truncated: 602 more columns]
